# Supplementary material for: Lipid extraction from dried blood spots and dried milk spots for untargeted high throughput lipidomics
Source: Royal Society of Chemistry journal article supplement (doi:10.1039/d0mo00102c), 2020-09-10
Supplement: d0mo00102c2.xlsx [file d0mo00102c2.xlsx]

## Sheet: +ve
DBS time course (+ve)
				00h	00h	00h	00h	00h	00h	00h	00h	00h	00h	00h	00h	00h	00h	00h	00h	16h	16h	16h	16h	16h	16h	16h	16h	16h	16h	16h	16h	16h	16h	16h	16h	24h	24h	24h	24h	24h	24h	24h	24h	24h	24h	24h	24h	24h	24h
				2.13673e+06	1.43235e+06	1.81607e+06	2.24942e+06	2.44721e+06	3.38504e+06	1.69596e+06	2.33314e+06	2.55947e+06	1.54328e+06	2.2486e+06	2.10627e+06	2.15769e+06	3.11399e+06	2.25992e+06	1.98936e+06	1.93666e+06	2.10353e+06	3.27421e+06	2.80388e+06	3.60961e+06	3.77858e+06	1.26021e+06	4.98991e+06	2.9163e+06	1.65413e+06	2.96217e+06	3.35578e+06	3.16132e+06	4.69248e+06	2.25152e+06	3.94663e+06	2.74918e+06	4.39817e+06	2.63824e+06	4.23267e+06	4.84931e+06	4.26087e+06		3.9659e+06	2.84214e+06	2.58285e+06	3.31084e+06	2.58265e+06	2.5637e+06	4.64814e+06
				27	47	36	29	22	11	31	24	35	37	26	30	27	27	25	37	45	30	10	25	9	20	59	10	27	59	20	9	18	3	29	10	8	19	24	27	2	7		11	13	15	10	15	20	5
				DBS_00h_01_Box1	DBS_00h_02_Box1	DBS_00h_03_Box1	DBS_00h_04_Box1	DBS_00h_05_Box1	DBS_00h_06_Box1	DBS_00h_07_Box1	DBS_00h_08_Box1	DBS_00h_09_Box1	DBS_00h_10_Box1	DBS_00h_11_Box1	DBS_00h_12_Box1	DBS_00h_13_Box1	DBS_00h_14_Box1	DBS_00h_15_Box1	DBS_00h_16_Box1	DBS_16h_01_Box1	DBS_16h_02_Box1	DBS_16h_03_Box1	DBS_16h_04_Box1	DBS_16h_05_Box1	DBS_16h_06_Box1	DBS_16h_07_Box1	DBS_16h_08_Box1	DBS_16h_09_Box1	DBS_16h_10_Box1	DBS_16h_11_Box1	DBS_16h_12_Box1	DBS_16h_13_Box1	DBS_16h_14_Box1	DBS_16h_15_Box1	DBS_16h_16_Box1	DBS_24h_01_Box1	DBS_24h_02_Box1	DBS_24h_03_Box1	DBS_24h_04_Box1	DBS_24h_05_Box1	DBS_24h_06_Box1	DBS_24h_07_Box1	DBS_24h_08_Box1	DBS_24h_09_Box1	DBS_24h_10_Box1	DBS_24h_11_Box1	DBS_24h_12_Box1	DBS_24h_13_Box1	DBS_24h_14_Box1
x.targets.name	targets.mz	Deviations	0s	Furse_Ex048_A10_DBS_00h_01_Box1.mzXML	Furse_Ex048_B10_DBS_00h_02_Box1.mzXML	Furse_Ex048_C10_DBS_00h_03_Box1.mzXML	Furse_Ex048_D10_DBS_00h_04_Box1.mzXML	Furse_Ex048_E10_DBS_00h_05_Box1.mzXML	Furse_Ex048_F10_DBS_00h_06_Box1.mzXML	Furse_Ex048_G10_DBS_00h_07_Box1.mzXML	Furse_Ex048_H10_DBS_00h_08_Box1.mzXML	Furse_Ex048_A11_DBS_00h_09_Box1.mzXML	Furse_Ex048_B11_DBS_00h_10_Box1.mzXML	Furse_Ex048_C11_DBS_00h_11_Box1.mzXML	Furse_Ex048_D11_DBS_00h_12_Box1.mzXML	Furse_Ex048_E11_DBS_00h_13_Box1.mzXML	Furse_Ex048_F11_DBS_00h_14_Box1.mzXML	Furse_Ex048_G11_DBS_00h_15_Box1.mzXML	Furse_Ex048_H11_DBS_00h_16_Box1.mzXML	Furse_Ex048_A08_DBS_16h_01_Box1.mzXML	Furse_Ex048_B08_DBS_16h_02_Box1.mzXML	Furse_Ex048_C08_DBS_16h_03_Box1.mzXML	Furse_Ex048_D08_DBS_16h_04_Box1.mzXML	Furse_Ex048_E08_DBS_16h_05_Box1.mzXML	Furse_Ex048_F08_DBS_16h_06_Box1.mzXML	Furse_Ex048_G08_DBS_16h_07_Box1.mzXML	Furse_Ex048_H08_DBS_16h_08_Box1.mzXML	Furse_Ex048_A09_DBS_16h_09_Box1.mzXML	Furse_Ex048_B09_DBS_16h_10_Box1.mzXML	Furse_Ex048_C09_DBS_16h_11_Box1.mzXML	Furse_Ex048_D09_DBS_16h_12_Box1.mzXML	Furse_Ex048_E09_DBS_16h_13_Box1.mzXML	Furse_Ex048_F09_DBS_16h_14_Box1.mzXML	Furse_Ex048_G09_DBS_16h_15_Box1.mzXML	Furse_Ex048_H09_DBS_16h_16_Box1.mzXML	Furse_Ex048_A06_DBS_24h_01_Box1.mzXML	Furse_Ex048_B06_DBS_24h_02_Box1.mzXML	Furse_Ex048_C06_DBS_24h_03_Box1.mzXML	Furse_Ex048_D06_DBS_24h_04_Box1.mzXML	Furse_Ex048_E06_DBS_24h_05_Box1.mzXML	Furse_Ex048_F06_DBS_24h_06_Box1.mzXML	Furse_Ex048_G06_DBS_24h_07_Box1.mzXML	Furse_Ex048_H06_DBS_24h_08_Box1.mzXML	Furse_Ex048_A07_DBS_24h_09_Box1.mzXML	Furse_Ex048_B07_DBS_24h_10_Box1.mzXML	Furse_Ex048_C07_DBS_24h_11_Box1.mzXML	Furse_Ex048_D07_DBS_24h_12_Box1.mzXML	Furse_Ex048_E07_DBS_24h_13_Box1.mzXML	Furse_Ex048_F07_DBS_24h_14_Box1.mzXML
2H-IS_CE1_[M+H-H2O]1+	374.383	1.93652	0.15	821.942	408.869	911.861	586.338	182.121	757.508	123.028	0	1198.04	325.464	529.21	987.284	369.577	373.903	0	58.9998	199.01	0	259.36	370.063	198.092	380.883	0	361.295	125.491	59.5962	169.923	350.621	70.4405	243.674	0	446.355	142.069	56.4208	133.748	0	363.015	539.123	0	134.054	279.915	0	357.281	66.9949	0	346.327
2H-IS_CE1_[M+NH4]1+	675.681	8.70233	0.7125	0	0	130.413	0	224.096	0	79.1881	0	0	0	0	264.408	0	227.607	0	0	138.711	0	0	0	0	0	67.2007	0	0	0	0	0	0	0	0	0	0	0	96.6284	0	0	79.1062	0	82.237	0	0	119.71	0	0	0
2H-IS_CE2_[M+H-H2O]1+	375.389	4.51134	0.0125	33197.7	22435.5	26201.9	27249.8	20836.8	30273.9	10853.8	17851.9	29624.2	22240.8	27178.2	28067.4	19037.6	26610.5	14585.5	17848.8	15724.2	10305.2	17422.1	17983.2	17735.5	14995.3	1577.73	18527.1	15814.6	10908.2	18021.6	19557.7	14878.2	21960.3	6965.39	19280.8	15975.5	13645.2	20054.8	6990.72	18674	19651.8	1956.83	13838.1	18058.8	11344.7	18645.6	12903.7	16066.5	19256.4
2H-IS_CE2_[M+NH4]1+	676.696	11.4028	0.65	0	0	0	72.4396	0	0	144.172	75.6553	88.8836	0	0	66.1659	0	127.83	153.832	94.4871	0	58.8319	0	82.1903	68.8295	380.245	71.7975	0	0	0	0	0	190.502	341.209	0	67.5784	155.527	34.9563	0	0	0	0	118.346	0	57.608	0	0	0	0	0
2H-IS_CE3_[M+H-H2O]1+	376.392	4.99618	0.0125	8244.33	5584.87	6237.79	6707.03	4542.8	6571.13	1924.76	4489.02	7616.33	5483.83	6820.64	7096.51	4578.17	7060.03	3754.06	4077.3	3364.2	1388.5	3397.11	3424.65	3698.43	2724.16	150.294	4248.94	3143.58	1782.81	4204.84	5018.74	2650.14	5198.66	363.17	4764.84	3624.27	2316.92	5227.6	522.153	4632.99	4884.45	132.057	2247.45	3829.21	1829.08	4269.78	2239.51	3580.62	4852.74
2H-IS_CE3_[M+NH4]1+	677.69	8.68692	0.4875	111.574	61.8099	0	183.836	0	101.575	213.962	73.6759	67.8198	0	0	95.1358	81.6816	231.1	283.626	133.716	0	107.65	149.03	0	79.2609	0	228.443	102.621	0	0	75.7247	0	74.7756	0	0	157.406	63.087	0	0	88.1281	123.295	351.284	86.7163	216.09	125.903	0	129.621	86.5886	0	130.055
2H-IS_CE4_[M+H-H2O]1+	377.395	7.6771	0.5375	156.332	148.822	0	129.988	58.1271	179.606	0	0	177.585	0	177.16	79.45	212.421	0	147.412	139.849	53.7868	0	0	0	55.5301	0	0	68.5982	0	0	0	53.7697	0	0	0	78.7602	64.8489	0	62.774	0	84.3015	0	0	0	58.1558	0	62.7053	0	0	67.271
2H-IS_CE4_[M+NH4]1+	678.693	10.6495	0.5875	0	0	0	0	113.941	124.517	0	74.56	0	0	0	83.8194	142.045	211.142	206.004	0	39.2023	0	64.1651	47.8525	75.8504	18.3524	179.511	81.7754	164.235	0	0	0	0	0	73.4212	0	0	349.221	187.9	0	61.9649	0	0	0	0	0	53.6195	0	30.3069	187.523
2H-IS_Cer1_[M+H - H2O]1+	548.684	5.4494	0.3875	78.6594	70.4797	0	158.234	0	179.108	0	70.2798	0	0	0	148.657	80.2572	504.427	338.809	67.1785	0	0	61.0154	161.763	140.981	0	0	0	66.7739	0	52.0548	142.828	0	104.645	0	213.482	0	0	0	194.118	161.959	138.973	112.217	0	146.82	68.2492	60.5476	65.2852	88.7543	352.464
2H-IS_Cer1_[M+H]1+	565.689	12.3743	0.7625	0	76.6427	0	0	111.153	0	0	0	0	55.7609	0	199.529	0	103.411	97.5713	0	0	0	0	0	0	22.4788	0	40.751	0	0	0	0	0	0	0	0	80.9005	0	0	0	79.0736	66.0678	0	0	0	0	0	0	0	0
2H-IS_Cer2_[M+H - H2O]1+	549.69	1.73189	0.0125	8969.58	5773.27	7480.77	8694.79	8135.27	13850.3	6839.43	10680.5	9798.62	6491.4	6841.66	9390.81	6128.73	11709.2	8945	9605.1	6087.22	3656.53	7651.35	7435.31	8674.93	8221.96	2070.88	12820.1	5235.97	3364.9	6703.94	9487.33	6853.67	10053	5987.03	11031.8	5903.2	5954.19	7779.85	4107.3	8864.64	9714.28	2133.56	7557.02	5675.47	4017.29	7401.7	6811.23	7067.21	9174.46
2H-IS_Cer2_[M+H]1+	566.694	11.7151	0.9125	0	0	0	0	0	0	0	0	67.5605	0	0	0	83.1547	0	206.238	0	0	0	0	0	49.8464	0	0	0	0	0	0	0	0	0	0	0	0	0	0	0	0	0	0	0	0	0	0	0	0	0
2H-IS_Cer3_[M+H - H2O]1+	550.695	2.35013	0	58531.8	46097.1	55192.4	57976.5	58677.8	92794.3	49888.7	67989.1	66395.3	41582.6	49319.5	60969.6	49261.8	84204.1	60237.3	67931.4	40968.9	32211.1	50569.6	54995.7	58556.2	55024.1	23975.5	82453.3	40668.1	30429.9	48013.6	59804.1	45536	71986.4	40833.8	72884.8	43405.9	43991.2	52687.9	34841.9	61447.5	71519.2	21522.6	52050.6	42510.8	39688.9	53014.4	48852.7	53410.5	65316.7
2H-IS_Cer3_[M+H]1+	567.7	6.20526	0.4375	0	0	0	183.572	143.922	79.3104	0	365.557	63.0532	0	127.381	240.38	285.542	122.942	234.195	278.789	0	0	85.586	236.246	48.2625	146.047	73.3446	98.3024	0	0	0	0	0	208.3	0	169.644	0	0	80.688	0	0	283.69	0	83.5355	84.1317	85.9141	90.1488	69.7144	0	134.401
2H-IS_Cer4_[M+H - H2O]1+	551.701	2.02568	0	194542	154077	181660	191100	192363	309429	164285	229159	215322	137690	168936	191943	162548	281630	198059	224384	135947	107474	173116	180819	193679	181853	78544.6	274318	134580	94886.8	157048	199267	154350	235904	141994	249139	142431	145955	173203	116328	211814	233641	71178.4	180289	138693	126799	173525	160227	175492	218209
2H-IS_Cer4_[M+H]1+	568.706	3.31123	0.025	1976.72	1713.78	1913.71	1602.05	2195.4	6194.88	2586.41	3818.14	2401.21	1077.65	1186.02	2592.02	1327.57	5292.26	4526.47	3146.03	439.784	409.247	1990.34	2129.39	1933.63	2075.14	232.3	5452.37	484.884	230.578	1081.07	2791.72	1681.34	4389.71	1709.33	4069.31	566.946	1514.91	1404.6	1184.89	3473.45	4115.43	148.447	3103.97	506.937	968.033	1216.99	1921.38	1419.63	3855.02
2H-IS_Cer5_[M+H - H2O]1+	552.706	1.70551	0.0125	71701.5	55845.5	63940.3	69106.4	68856.8	109901	57856.4	83674.7	78029.3	49365.5	59480.9	69028.3	59801.2	100655	68754	81943.2	49638.2	39533.9	62949.1	64222.4	69797.8	64461.6	28688.9	98531.2	49193.2	35607.6	56077.2	68532.4	55100.8	82745.8	50534	87457.3	52058.5	54394.3	66754.9	41596.6	72956.7	82427.8	26033.4	64545.2	51360.6	45661.3	62018.2	57000.6	63094.4	75924.5
2H-IS_Cer5_[M+H]1+	569.711	4.5732	0	11297.1	7580.29	10704.3	10951.3	12497.1	23926.6	12142.1	15580	13253.7	6701.11	9306.11	12561.7	9279.35	20584.7	16540	15013.9	4835.27	4254.97	9192.62	11293.8	11568.6	10760.2	3614.75	21904.8	4979.42	2917.9	8364.07	12411.3	8119.25	16429.1	10449.9	18059.3	5659.46	8825.28	9546.49	9014.05	14978.3	17433.3	2509.27	11821.1	5977.76	6395.19	9824.96	10251.1	10224.5	15541.4
2H-IS_Cer6_[M+H]1+	570.716	2.49748	0.0125	3012.97	1860.45	2100.65	2678.49	3998.35	7692.39	3106.31	5136.69	3126.98	1235.25	1728.63	3939.55	1922.77	6781.97	5089.34	4162.63	705.745	902.76	1945.9	3308.51	3342.76	2543.39	509.094	8213.43	760.866	365.878	1722.95	3573.37	2016.53	5378.04	2844.09	6838.04	663.823	1642.84	2177.3	1856.61	3554.4	5640.1	225.774	3878.94	1130.54	955.729	1788.57	1833.9	2909.75	5256.72
2H-IS_Cer7_[M+H]1+	571.72	7.55086	0.4875	69.3666	0	0	209.933	82.3077	187.647	159.489	66.6754	0	0	83.4807	0	63.7408	221.52	160.875	150.39	0	0	218.577	0	0	0	64.0584	200.582	0	0	0	0	0	0	0	12.2394	0	67.3057	0	0	0	81.5331	0	84.3419	74.8472	67.5164	0	0	0	0
2H-IS_LPC1_[M+H]1+	420.544	2.59158	0	32603.3	22501.7	25030.5	32085.6	29580.5	43729.3	26441.1	31574.6	39675.2	19331.6	25955.2	30701.5	28409.2	43616.1	32718.9	34245.4	12184.1	9449.21	19084.8	19650.7	21330.4	17723.7	6030.24	28097.7	12480.5	9521.18	16952.2	19632.3	15905.7	23258.5	13498.1	22956	13690.9	13986.8	16554.3	10532.3	22252.8	24089.5	6198.16	19465.9	13214.4	12126.5	16629.7	14753	16727.9	22978.1
2H-IS_LPC2_[M+H]1+	421.55	2.95901	0	169483	115386	124628	162653	146754	220366	135827	153303	206068	97860.5	129326	155507	148743	224395	162300	164942	62792.1	51209.9	92744.5	100376	109133	93547.6	34729.6	141626	63219.1	44960.7	83341.9	107886	80753.3	121015	72054.8	118109	65955.1	70106.8	82814.4	51550.2	110587	124866	33196.4	102538	65943.1	61280.8	84012.3	75363.7	87797.4	119617
2H-IS_LPC3_[M+H]1+	422.555	2.66533	0	513746	341236	399199	503923	442518	660701	405403	459446	615553	302978	394680	481832	437236	667056	490328	509092	184052	158095	288430	304609	328987	282688	108123	428576	191723	137909	257310	331836	247136	368541	213959	360645	203397	225982	261459	158121	340810	375614	100455	310907	206159	181524	265627	233246	270044	373260
2H-IS_LPC4_[M+H]1+	423.559	3.26349	0	105966	70691.8	77297.5	98602.1	90457.1	134836	82669.5	93736	125408	58098.3	79130	97655.3	88431.7	133488	99613.5	104358	37755.8	32513.8	57332.8	58930.3	66794.8	56851	20348.7	86253.4	40218.9	28662.7	49565.6	66213.5	50634.2	74688.2	42999	73031.4	40202.5	44280.6	53231	32091.8	68098.3	75961.1	19699.1	60796.4	40617	36894.4	51003.8	46017	53341.8	74841.1
2H-IS_LPC5_[M+H]1+	424.562	3.4485	0	6259.29	3148.52	4894.07	5831.31	4457.68	8143.46	3369.28	4815.7	7671.75	2706.01	4924.49	5457.53	5092.03	7246.02	5797.29	5104.05	1295.63	700.996	2839.59	2611.13	2592.42	2633.36	202.728	4446.49	1368.62	667.113	1947.98	3115.59	1936.05	3355.26	1881.56	3111.38	1607.31	1836.43	2265.3	966.655	3709.43	3895.14	471.857	2745.06	1324.58	1136.38	2271.82	1665.6	2068.5	4255.33
2H-IS_PC1_[M+H]1-	788.76	0.467841	0	39851.4	28752.3	34173.1	37617.4	38305.9	60948.2	27891	40917	49340.2	23112.5	31443.3	37675.6	35768.8	53448	34318.7	35340.7	21255.9	19550.8	30741.7	35527.4	38560	35448.2	10453.1	55571.7	23070.1	15854.6	28241.1	37799.7	27828.3	45191.7	28038.4	46283.2	23732.6	25046.2	26667.4	16745.2	41863	43473.7	11332.2	37410.4	22917.2	22820.4	30849.7	29155.5	33699	42067
2H-IS_PC2_[M+H]1-	789.765	2.03225	0	177966	131010	145571	170439	168883	267730	124812	177672	223856	105733	138315	169553	155177	240027	158571	156758	98649.3	86910.2	137764	153747	166945	153120	47279.9	247647	102188	76932.5	128337	166133	124771	202099	126812	206392	102410	111003	124819	74405.9	183179	192527	48377.1	163734	98963	101832	134626	125244	145076	180960
2H-IS_PC3_[M+H]1-	790.771	2.09131	0	288189	203615	238987	273670	274907	446915	203562	290724	370146	168517	223123	271229	255664	400967	255085	253517	153630	141401	224002	257252	274925	248757	74734.8	414634	163893	120402	209668	273792	207463	333591	205411	331806	164007	177015	202622	122341	300577	314061	81919.7	275942	157991	165717	217481	202470	238370	296875
2H-IS_PC4_[M+H]1-	791.776	1.07827	0	196397	139054	161504	184792	187055	298930	135069	194840	249017	112784	153958	186661	174083	264401	169026	173381	104776	95334.3	151939	168818	185052	170176	50603.5	275233	110716	80250.4	140877	182925	136188	223898	139213	223327	116022	120259	136651	80991.8	205010	211260	53982.3	181852	108051	109852	148731	141136	160218	200483
2H-IS_PC5_[M+H]1-	792.78	2.38402	0	67186.4	48219.2	55982.2	62979.5	64538.2	97846.4	45728.6	64078.3	82202.6	38854.2	51210.2	61940.9	58495.7	86734.6	58179.6	55448.6	35583.9	30599.1	49250.7	56522.5	60250.6	56284.2	16624.7	91668.4	35934.5	27276.1	47170.8	62497.1	46800.3	75223.8	45765.6	75699.3	36972.7	39619.5	44476.5	26872.3	65910.1	71672.7	17541.2	60446.4	35079.8	37619.2	48633.2	45947.7	52847.1	67601.2
2H-IS_PC6_[M+H]1-	793.784	1.84874	0	13756.9	10168.7	10742.8	13060.5	11779	21332.3	9298.08	12805.4	17825.2	8127.78	10272.6	13857.3	11880.7	18527.4	12705.3	12688.6	6917.78	6852.21	10418.3	10907.2	12328.2	12636.7	2851.77	18724.3	7165.47	5604.06	9704.01	12787.2	9573.89	15584.1	9265.64	15659.6	7982.14	8518.68	9524.23	5744.04	13990	15126.1	2464.34	12442.3	7941.35	7236.62	10000.1	10284.5	12026.3	14824
2H-IS_PE1_[M+H]1-	745.707	6.48081	0.3	0	0	351.997	157.709	0	86.3458	175.726	0	0	80.4077	160.348	79.9072	0	79.9559	207.605	0	150.785	70.7818	137.549	125.469	0	140.995	138.756	185.719	57.5403	0	64.9506	0	0	137.076	75.7325	161.026	80.823	171.719	222.408	0	75.6276	99.7915	173.207	0	129.772	0	102.489	0	75.5209	153.493
2H-IS_PE2_[M+H]1-	746.713	0.681468	0.0125	4926.69	3287.63	4660.29	4799.54	4408.34	7511.61	2689.71	4270.2	4320.32	2775.74	3364.03	4313.08	3375.48	6286.5	4892.61	3512.4	4055.08	2856.7	5136.78	4800.46	6362.35	5263.97	1042.66	8022.65	4339.6	2022.91	5381.86	6393.49	4111.32	6838.17	3448.32	7168.67	4117.69	5076.07	5356.17	2634.52	7417.37	7585.95	738.732	5509.6	4934.52	3243.61	5372.23	4475.64	4875.22	6536.14
2H-IS_PE3_[M+H]1-	747.719	1.74709	0.0125	25808.3	22300.5	27215.4	28180.3	24449.1	42493.6	21896.5	28455.1	28429.9	19990.5	26565.7	27241.1	24449.9	38546.6	30769	24234.8	26117.4	21396.7	32257	32606	35464.3	29548	12865.5	41946	26854.6	18947.9	31441.6	33806.5	26647.6	37871.4	24595.4	35973.8	27498.2	27078.1	31391.5	18300.4	37737.8	37591.6	13872.9	29943.5	28304.4	24127.8	30648.8	26290.7	30688.2	35161.5
2H-IS_PE4_[M+H]1-	748.724	1.60773	0	44048.8	37929.6	47251.9	49330.1	43911.7	69343.4	35891.9	46803.2	49835.1	33907.3	41645.4	48602.1	39150.9	60359.1	51761.8	41745.9	43866	35700.5	53801.4	54524.3	58420.8	50446.7	21946.8	71517.9	44612.4	32933.1	53973	58465.3	46141.5	66293.5	41037.7	63477.4	46400.3	46909.3	54136.6	30654.3	61045.9	64817	23914.4	52614.9	46351.5	39388.4	53333.6	45523.4	50951.9	62350.4
2H-IS_PE5_[M+H]1-	749.73	0.411416	0.0125	29983.6	25617.1	30827.7	32683.7	27954.3	45208.5	23254.9	29582.8	32025.2	22579.5	29789.4	30835.1	26652.1	40608	32132.2	26696.2	29649.4	24184.4	37746	35482.7	38174.3	32873.8	14342.3	46299.7	30335.9	21843.1	36476.9	39234.3	29188.3	44486.7	26015.4	40456.9	29939.8	30251.1	34872.2	21138.3	40538	41930.9	16018.3	33341.7	32129.3	27369.7	34467.8	29945.1	32500.6	43553.9
2H-IS_PE6_[M+H]1-	750.734	1.94409	0.0125	8896.01	7895.66	10147.9	10208.7	9236.34	16134.6	8218.53	10537	10181.4	7083.12	8761.71	10208.6	8840.85	13111.9	11206.6	8211.36	9313.25	7543.59	12088	11356	12973.6	10908.3	3300	15460.5	9411.84	7242.45	10951.6	11381.8	10094.8	14566.2	8171.89	14007.3	10788.1	10027.2	11033.8	6493.07	13048.5	13922	5732.61	10306.6	10781.8	9099.46	11318.6	9663.24	10581.4	13724
2H-IS_PE7_[M+H]1-	751.738	1.67881	0.0125	1010.54	598.665	1013.66	1176	1067.04	2042.67	596.268	463.016	919.993	587.772	1157.55	1081.85	475.08	1505.38	878.627	445.225	661.194	482.375	1995.36	1509.02	2355.23	465.625	161.827	2118.26	1460.89	344.146	1458.06	2200.42	850.531	1846.12	805.579	2025.44	1358.59	648.125	1941.43	420.147	1874.62	1664.17	95.667	875.902	1270.19	1002.27	1455.2	922.58	1761.39	1924.57
2H-IS_PI_1[M+NH4]1+	882.751	8.71831	0.0375	1135.57	292.073	304.337	171.16	784.522	1468.75	188.418	478.689	1088	240.775	160.862	84.4689	143.228	751.467	267.336	529.822	133.242	349.95	382.583	187.278	959.155	324.703	0	816.577	724.794	87.4918	260.917	370.804	87.6218	784.244	135.992	562.642	746.56	1079.9	603.891	346.392	694.048	967.309	0	382.808	241.919	208.555	983.256	289.403	535.322	267.274
2H-IS_PI_2[M+NH4]1+	883.757	10.469	0.0875	152.915	148.381	195.642	376.62	80.9937	463.942	139.394	416.658	374.218	268.331	194.493	416.44	174.186	0	87.3027	310.321	42.1809	45.4974	80.8723	87.6324	196.728	276.71	72.2276	620.654	59.4281	0	244.632	46.8916	203.787	235.681	157.836	566.355	119.593	571.611	522.234	158.073	465.543	252.301	78.2615	112.697	452.348	63.2472	241.029	62.7661	156.828	480.322
2H-IS_PI_3[M+NH4]1+	884.763	9.33365	0.2875	65.0999	125.067	0	0	45.3417	176.776	0	171.043	162.803	75.7017	76.1581	229.325	40.7359	0	0	117.804	0	83.4233	74.4968	61.9895	76.8036	0	0	263.532	0	0	75.7126	0	71.411	0	0	85.6266	65.0149	190.005	153.193	154.331	146.541	384.84	38.7891	121.937	223.626	94.2701	0	156.534	331.905	59.459
2H-IS_PI_4M+NH4]1+	885.768	6.97352	0.8125	0	0	0	0	0	0	0	53.2047	0	105.404	0	0	0	0	279.38	0	0	0	0	0	0	0	0	0	0	0	43.5301	0	0	0	61.2146	0	0	0	0	0	0	0	0	0	63.7706	0	0	78.695	0	0
2H-IS_PI_5[M+NH4]1+	886.773	7.54985	0.8375	0	0	0	37.857	0	0	0	0	74.5299	0	0	0	0	0	0	0	0	0	0	0	0	0	0	0	0	0	0	0	0	82.0577	0	0	0	0	62.7586	0	0	445.044	0	0	0	0	75.5658	0	175.339	0
2H-IS_PI_6[M+NH4]1+	887.776	7.15946	0.85	0	0	0	0	0	134.613	53.18	93.2495	0	0	80.6991	79.7373	0	0	0	0	0	0	0	0	42.508	0	0	0	0	0	0	0	0	0	0	71.7026	0	57.6974	0	0	0	0	0	0	93.0449	0	48.1451	0	0	145.829
2H-IS_PS1_[M+H]1+	728.751	4.69093	0.6875	64.9358	144.607	0	0	78.4967	0	0	61.5291	0	0	0	0	0	173.052	53.9291	0	0	0	0	0	0	0	0	0	0	0	0	0	74.8719	81.3625	0	0	0	60.731	0	0	0	62.7913	38.9298	0	0	0	153.881	36.3069	0	0
2H-IS_PS2_[M+H]1+	729.757	2.81738	0.0625	470.618	74.0122	344.038	316.78	174.022	866.431	474.655	140.665	445.594	79.9306	204.708	301.187	300.666	200.234	180.624	263.111	136.363	406.194	409.895	305.702	297.405	265.307	64.891	1198.08	319.709	166.695	0	241.306	394.169	634.558	94.1905	359.756	201.307	141.468	156.81	125.957	483.764	0	0	105.087	294.185	215.711	229.013	326.297	485.328	428.646
2H-IS_PS3_[M+H]1+	730.763	3.61791	0.0125	2345.53	1671.16	3241.37	2701.05	1871.81	5270.05	2134.49	3671.37	1883.46	1892.97	2074.26	2797.58	2844.29	3404.88	3193.89	2133.69	2191.08	1341.49	4340.29	3691.34	3576.63	2981.1	596.349	5879.07	2932.17	1047.86	2965.4	4143.67	2922.93	5206.8	1995.17	4435.43	2542.62	2238.22	3919.24	748.525	4518.51	333.712	816.722	3306.89	2853.98	1593.98	3399.43	2254.47	3151.22	4255.32
2H-IS_PS4_[M+H]1+	731.769	2.1121	0.0125	5567.5	4096.74	6051.69	6396.54	6252.44	11469.4	4878.9	6522.63	6399.26	4076.72	6789.45	7317.59	5796.64	6495.93	8890.23	6342.5	6375.3	4491.66	7498.21	7562.55	7519.01	6775.74	1746.21	12377.3	5837.18	3886.87	6846.79	7972.41	5425.32	9210.63	5974.35	9371.51	5693.23	7464.58	7382.78	3268.87	8794.33	689.732	2318.8	7477.04	6740.11	4620.14	7276.34	5486.62	7230.4	8593.29
2H-IS_PS5_[M+H]1+	732.775	1.86142	0.0125	7086.45	6449.26	7618.75	8355.34	7099.02	13724.6	6385.77	8530.51	7521.7	5669.21	7316.22	8576.71	6176.47	8049.06	9238.94	6610.07	7205.34	5223.2	8678.38	8773.44	9012.46	7584.08	3286.18	14140.4	7038.3	5483.34	7576.83	9175.63	6762.05	11045.6	6565.39	10865.8	6970.09	8064.91	8870.16	3327.74	10449.1	12586.5	2918.43	8695.8	8352.24	5717.87	8527.17	6337.55	8212.95	11065.7
2H-IS_PS6_[M+H]1+	733.781	26.1147	0	49249.3	41385.9	58511.8	67874.2	71631.7	111726	51692.4	71857	62006.9	33270.2	54973.5	73825.7	59285.5	102949	66193.7	63793.5	43568.2	37017.6	60857.8	73723.9	71337.1	72114.2	22437.8	113904	43370.1	31060.8	58705.9	76742.9	58898.7	86479.6	55498.4	89327.1	46745.5	48475	56993.4	34400.8	81812.1	83711.1	23099.9	75894.9	44021.2	45058.4	61466	57624.5	70999.9	86153.5
2H-IS_PS7_[M+H]1+	734.787	24.3846	0	157519	129984	189445	223186	226139	365441	163728	236812	196945	110623	177171	231470	195891	347262	223558	201063	134434	115975	199763	239308	237542	236753	70740.1	382853	138600	99958.2	188224	250685	191855	286490	177214	303481	146814	155726	180935	110495	267191	272522	74405.2	250369	138371	143995	195642	189506	225547	284808
2H-IS_PS8_[M+H]1+	735.791	26.6295	0	63109.4	52842.7	77200.3	86690.5	92244.1	147007	63917.7	94138.7	81420.7	44627.9	72544.3	94430.8	79992.3	133023	87721.8	79452.5	55872.6	47310.7	79073.5	93882.1	92406.7	92799.7	29746.3	147927	58052.6	40285.7	77206.6	98439.5	76176.9	111691	68642.3	120808	58762.3	61240.6	72813.9	44793.2	105507	105968	30072.5	98509	54756.2	56416.1	80115.6	75805	88522.3	112088
2H-IS_PS9_[M+H]1+	736.795	21.3458	0	13563.8	836.697	15470	17636.3	17642	26718.6	12908.3	18134.2	15603.6	571.538	15010.7	18025.4	15034.5	28859.5	16822.7	15890.2	988.095	838.535	17520.8	18282.9	18744.8	17540.1	747.708	29600.8	998.693	769.109	1607.33	20008.6	15758.7	23860.8	14807.2	23715.6	1252.44	11903.3	14167.4	1133.72	22259.9	21741.2	773.421	19922.1	1204.76	1430.58	16014.7	15125.7	18320.8	22605.3
2H-IS_SM1_[M+H]1+	732.756	1.81666	0.0125	7080.61	5103.91	9548.7	9833.32	10672	17558.4	7198.18	10857.2	9052.79	3526.99	8694.8	10418.1	8113.14	17104.9	10742.2	9983.99	5811.6	3872.61	9695.46	12265.2	11934.5	11208.3	2201.48	17520.3	6228.47	3730.17	8949.29	11543.2	8176.99	13813.1	7779.35	14251.3	5999	6494.2	8640.64	3276.71	13331.2	12586.5	2580.98	11159.9	6000.48	5688.3	9059.42	8359.25	11035.3	13379.2
2H-IS_SM2_[M+H]1+	733.762	2.48718	0	49249.3	41385.9	58511.8	67874.2	71631.7	111726	51692.4	71857	62006.9	33270.2	54973.5	73825.7	59285.5	102949	66193.7	63793.5	43568.2	37017.6	60857.8	73723.9	71337.1	72114.2	22437.8	113904	43370.1	31060.8	58705.9	76742.9	58898.7	86479.6	55498.4	89327.1	46745.5	48475	56993.4	34400.8	81812.1	83711.1	23099.9	75894.9	44021.2	45058.4	61466	57624.5	70999.9	86153.5
2H-IS_SM3_[M+H]1+	734.768	1.8473	0	157519	129984	189445	223186	226139	365441	163728	236812	196945	110623	177171	231470	195891	347262	223558	201063	134434	115975	199763	239308	237542	236753	70740.1	382853	138600	99958.2	188224	250685	191855	286490	177214	303481	146814	155726	180935	110495	267191	272522	74405.2	250369	138371	143995	195642	189506	225547	284808
2H-IS_SM4_[M+H]1+	735.771	1.25718	0	63109.4	52842.7	77200.3	86690.5	92244.1	147007	63917.7	94138.7	81420.7	44627.9	72544.3	94430.8	79992.3	133023	87721.8	79452.5	55872.6	47310.7	79073.5	93882.1	92406.7	92799.7	29746.3	147927	58052.6	40285.7	77206.6	98439.5	76176.9	111691	68642.3	120808	58762.3	61240.6	72813.9	44793.2	105507	105968	30072.5	98509	54756.2	56416.1	80115.6	75805	88522.3	112088
2H-IS_SM5_[M+H]1+	736.774	0.991849	0	13563.8	10625.9	15470	17636.3	17642	26718.6	12908.3	18134.2	15603.6	7853.35	15010.7	18025.4	15034.5	28859.5	16822.7	15890.2	10916.7	9298.26	17520.8	18282.9	18744.8	17540.1	5406.94	29600.8	11310.3	8344.68	14754.3	20008.6	15758.7	23860.8	14807.2	23715.6	11563.4	11903.3	14167.4	8724.03	22259.9	21741.2	5369.67	19922.1	11172.2	12074.4	16014.7	15125.7	18320.8	22605.3
2H-IS_TG45_1[M+NH4]1+	867.25	1.59932	0.0125	6765.85	4396.51	3397.76	3766.81	5315.25	7449.58	4926.56	6648.13	6733.88	2961.52	4994.25	4861.04	3609.12	7308.98	3137.05	7389.85	1373.7	1209.24	2092.82	3232.51	3553.45	3372.81	636.852	7775.81	1249.15	999.721	2346.79	3852.11	2748.96	5101.51	2345.57	6154.95	1893.02	1162.12	2254.67	1219.79	4080.48	5675.92	217.328	4704.95	1502.65	1079.39	3242.08	1625.83	3093.84	4769.39
2H-IS_TG45_2[M+NH4]1+	868.256	2.30638	0.0125	31416.3	21610.4	19118.5	20351	25691.3	33397.9	22909.1	29395.7	28885.6	18404.9	20598.1	22399.3	19910.1	29357.9	21430	31074	11114.4	10416.9	14650.8	17732.3	15730.1	17593.2	9875.23	31009.3	12356.6	10764.6	16196.5	19646.4	15147.4	25700.7	14777.6	28954.3	12021.8	13382.4	16436.4	9367.96	22538.5	24703	5613.79	20986.7	12949.9	11913.4	16215	15624	17439.2	23385.4
2H-IS_TG45_3[M+NH4]1+	869.262	0.639911	0	81842	54802.8	49684.5	55682.3	69914.4	94774.7	61386.4	78952.6	76019.1	48815.5	57481.6	61063.4	55197.4	81984.7	60994	85071.8	30414.3	29255.7	41794.6	50142.1	47356.7	51957.7	27439.4	84990.8	32865.1	28134.1	40930.4	55857.9	43257.5	70176.7	43978.2	78657.4	32568.6	30816.5	43129.1	26425.5	58640	69055.3	17390.7	56311.8	34188.4	31230	44928.3	43920.8	48886.1	61485.8
2H-IS_TG45_4[M+NH4]1+	870.267	1.61588	0	115377	78810.9	74181.3	80532.1	99429	133542	88442.1	112152	110657	68837	83812.7	85149.7	77433.7	114604	86910.1	124244	42125.8	41954.9	61664.7	71528.8	68647.6	76511.7	39950.6	127644	49477.2	39296.9	59050.3	81737.5	62001.1	99742.6	62051.6	111829	47945	45981.4	59820.7	37707.7	82743.4	100757	24808.8	81275.6	48541.3	45288.8	63632	61839.4	71776.8	89234.3
2H-IS_TG45_5[M+NH4]1+	871.271	1.7841	0.0125	51675.7	35845.2	33360.3	37195.4	43353.6	58447.8	38691.7	50947.6	49551.3	29881.6	38506.9	38568.6	34538.1	54451.5	38523.1	56263.8	20239.7	18739	27839.8	32146.4	29722.8	34475.8	17024.7	54448.1	22041.3	18265.7	26669.8	36469	29081.2	45327.9	27893.7	50759.7	22107.7	20441.3	27625	16650.7	38422.4	45645.5	10531.4	37473.2	20858.8	20140	29029.5	26836.3	31676.1	39491.3
2H-IS_TG45_6[M+NH4]1+	872.274	1.25534	0	14074.6	9559.18	8437.55	9611.44	10797.7	15197.3	9976.04	11977.5	13758.3	7690.43	9125.65	10055.1	8483	12891.2	9685.47	13217.4	4028.26	3928.71	6897.57	7294.14	8009.1	7555.07	3308.42	13806.6	4504.74	3164.66	6553.74	8184.82	6686.73	11574.6	5956.81	11455	3728.05	4130.1	6790.4	3174.47	9484.36	10510.8	970.822	8678.86	4229.65	4381.01	6944.84	6293.1	7799.69	10102.1
2H-IS_TG45_7[M+NH4]1+	873.278	2.3164	0.1375	1173.81	218.771	263.134	374.063	186.758	1236.95	161.872	535.444	616.661	73.8952	134.321	236.923	274.113	308.714	188.76	812.864	0	0	87.431	187.407	83.0893	203.721	136.083	572.504	151.93	226.247	144.724	78.3902	340.955	100.461	144.42	847.014	73.4866	154.775	171.461	59.1454	205.848	197.849	0	179.966	215.021	100.525	64.4268	72.7277	260.001	291.68
2H-IS_TG48_1[M+NH4]1+	915.335	4.8841	0.8125	0	0	0	0	0	0	95.8549	69.5543	86.39	0	0	0	0	95.1945	0	0	0	0	0	0	0	0	0	0	0	77.8759	0	0	0	0	0	0	0	0	0	0	0	80.6184	0	130.618	0	0	0	0	79.4583	108.422
2H-IS_TG48_2[M+NH4]1+	916.341	1.797	0.1625	890.085	203.22	95.8682	338.065	725.231	978.326	602.959	965.473	1034.12	447.354	476.189	365.164	434.513	344.096	548.065	990.049	0	0	350.664	84.926	380.823	280.214	0	1053.55	476.988	0	100.509	846.932	278.914	666.875	182.908	965.112	69.9861	80.7769	298.135	0	530.336	756.546	0	345.103	0	69.197	186.044	235.005	284.24	502.157
2H-IS_TG48_3[M+NH4]1+	917.347	1.67675	0.0125	6041.14	4045.64	1755.78	1636.89	3537.64	4551.26	3870.5	4546.33	5110.55	2312	3142.17	3110.21	2561.18	4418.07	2001.66	5545.01	1013.39	478.235	1751.8	1971.47	1995.84	1658.34	903.354	5982.32	1429.04	592.184	2265.93	2857.34	1854.02	3817.41	1601.86	5234.72	747.408	690.599	1577.33	757.173	3457.73	3612.28	209.914	2736.27	988.976	849.328	2718.14	1650.6	2048.04	3235.8
2H-IS_TG48_4[M+NH4]1+	918.352	2.48657	0.0125	7144.79	6018.33	3573.1	2513.75	5980.71	7188.14	4540.7	5885.06	7722.07	3561.67	3856.83	3968.13	3221.11	6896.35	4573.28	7054.85	1818.41	1444.75	3373.72	4067.43	3040.98	2312.09	1043.47	6744.92	1429.77	1118.95	3741.35	4596.42	2770.7	4987.53	2786.01	6450.15	1412.64	1472.72	2451.41	1167.57	4860.62	5114.13	213.146	3645.2	1653.36	809.56	3409.63	2631.84	3895.68	3532.49
2H-IS_TG48_5[M+NH4]1+	919.357	3.2506	0.0375	2090.57	1552.98	1004.27	381.919	1251.86	1723.14	1010.63	1726.66	1469.4	780.066	485.351	1158.62	614.342	813.912	747.33	1475.31	153.606	68.0235	1162.79	752.199	660.035	810.86	84.8949	1824.42	283.772	236.298	501.519	1204.3	458.861	1310.93	486.394	1768.57	415.526	481.578	543.883	68.0267	774.377	1077.16	0	395.386	434.5	293.599	434.636	645.936	721.849	718.487
2H-IS_TG48_6[M+NH4]1+	920.361	4.1121	0.7125	169.375	88.5545	0	83.6061	0	0	164.448	0	0	0	61.0649	0	84.0544	0	0	0	0	0	0	0	65.5705	0	0	109.437	0	0	0	93.2234	0	0	0	0	0	0	0	0	0	0	0	85.4404	0	76.5349	0	0	0	0
2H-IS_TG54_1[M+NH4]1+	1011.5	3.7469	0.9625	0	0	0	0	0	0	0	0	0	0	0	0	0	0	0	0	0	0	0	0	0	0	0	0	0	0	0	0	0	0	0	0	0	0	0	0	0	0	0	0	0	0	0	0	0	0
2H-IS_TG54_2[M+NH4]1+	1012.51	6.60899	0.8875	73.7042	0	0	0	47.6304	0	0	0	0	0	0	0	0	0	0	0	0	80.9441	0	0	0	0	0	0	0	0	0	0	0	0	0	159.392	0	0	70.0859	0	0	0	0	0	0	0	92.4364	0	0	0
2H-IS_TG54_3[M+NH4]1+	1013.52	3.77752	0.7625	90.3556	81.7141	0	0	0	0	120.166	0	0	120.717	0	0	0	0	0	0	0	0	74.6352	0	0	76.8858	0	0	0	0	0	0	0	0	62.8528	528.364	76.8976	0	85.9795	0	0	145.743	0	86.0352	0	85.5265	0	0	0	0
2H-IS_TG54_4[M+NH4]1+	1014.52	3.9069	0.7625	72.7292	0	189.765	0	0	0	0	0	110.635	0	0	77.1598	0	0	0	151.539	75.6651	0	168.551	144.735	0	77.8398	0	0	0	0	0	0	0	0	0	396.759	0	99.5196	0	0	0	98.8557	0	0	0	0	0	256.28	0	0
2H-IS_TG54_5[M+NH4]1+	1015.52	5.5944	0.825	122.511	0	0	83.7842	0	0	0	36.0227	0	0	0	0	0	55.8414	0	0	0	0	0	0	0	0	0	0	0	0	57.1761	0	0	0	0	121.805	0	0	0	0	0	0	0	0	0	78.8597	67.7221	0	143.822	0
2H-IS_TG54_6[M+NH4]1+	1016.53	5.98114	0.8875	0	0	0	64.6912	0	0	0	0	0	0	0	0	0	0	0	0	0	0	0	0	0	0	0	0	0	0	0	70.7118	0	0	0	0	0	0	0	0	0	0	0	0	66.377	0	0	92.9314	0	0
CE(16:00)_[M+Na]1+	647.574	2.3611	0.075	333.526	0	63.6693	162.397	221.464	407.984	243.394	306.761	683.331	207.139	71.591	199.371	69.4222	0	0	229.363	573.102	295.716	802.138	291.817	1924.28	751.485	0	1158.95	1373.37	234.833	1411.45	1136.04	539.967	980.32	0	346.605	1393.16	428.46	1113.8	0	1246.17	895.596		165.24	628.427	507.333	736.295	167.769	204.997	526.717
CE(18:01)_[M+Na]1+	673.589	4.62174	0.025	660.619	250.381	301.163	407.268	0	371.126	70.9651	103.735	1386.33	569.091	418.691	779.768	80.7565	179.796	82.3236	295.382	2507.33	979.085	2754.3	870.57	5636.36	999.576	0	438.842	2451.45	833.485	3419.47	2625.21	936.917	1619.57	198.056	1253.82	3356.95	1590.43	2493.88	286.667	2237.85	1039.37		234.153	2198.33	1354.67	2985.16	420.574	403.967	1422.85
CE(18:02)_[M+Na]1+	671.574	4.49364	0	6393.92	4535.54	3002.5	3727.86	1482.18	3719.2	623.611	1728.59	6715.03	5712.43	3084.88	4541.82	1754.84	1902.07	508.127	3874.49	9491.79	7006.97	11749	7782.58	18851.8	6393.32	228.108	6231.11	12136.5	6116.16	13249	10868.1	8432.43	9641.78	1987.26	6338.48	12292.8	8191.78	11430.4	2884.3	10527.1	7937.26		2179.99	10451.6	6718.03	11876.9	5595.22	6113.43	8183.91
CE(20:03)_[M+Na]1+	697.589	8.81738	0.3375	65.1	70.1439	81.9444	0	218.639	368.971	108.117	0	143.135	0	0	150.321	71.2028	0	102.453	243.706	71.2791	69.1206	163.666	0	208.132	168.288	0	459.865	80.8971	0	149.574	181.615	72.4818	265.674	31.0896	436.041	108.225	0	67.4544	72.2088	789.298	647.363		265.96	64.7833	86.2576	0	76.6343	124.025	336.75
Cer(34:01)_[M+H-H2O]1+	520.509	2.25351	0	3491.47	154.893	291.34	3706.54	757.092	4603.98	598.267	955.051	398.33	472.935	2290.61	358.925	886.187	1363.93	2124.51	885.612	1232.83	3032.69	4190.96	1501.12	2209.63	3455.28	960.95	7510.01	6747	2502.95	2176.6	2257.02	5825.58	4002.18	671.159	2791.56	2018.68	3353.44	1845	652.171	5359.04	2106.17		3878.34	1554.49	2848.61	2407.2	1184.27	1737.61	2489.52
Cholesterol)_[M+H-H2O]1+ & lathosterol_[M+H-H2O]1+	369.352	4.11601	0	312979	251279	275540	329121	327128	456726	251788	302174	368568	280898	287931	310938	236720	408801	312639	299333	320294	296343	414174	355237	470592	482293	147712	595175	384888	238903	429258	407866	385886	557731	298192	484814	377079	289041	357273	210959	592040	523984		400978	290967	331320	359238	284069	310864	485233
DG(18:00)_[M+H-H2O]1+	355.285	3.29818	0	1667.94	1019.33	1937.68	1311.71	2881.89	6406.76	2687.94	4595.98	865.171	1661.36	4482.04	1714.34	8533.36	3054.7	1027.62	1788.33	219.126	486.632	8819.67	1281.02	4343.13	1104.09	1170.98	4793.8	5064.72	597.818	4611	7075.35	3294.61	10350.6	782.346	6841.07	9425.08	70800.7	10002.7	87414	10769	15468.8		5981.37	26039.5	9676.72	20272.3	15047.6	6018.75	32823
DG(20:00)_[M+H-H2O]1+	383.316	5.67743	0	8058.01	2950.18	6928.29	6030.34	11115.4	17757.7	9524.06	16532.3	38261.6	8705	11368.6	7745.46	28439.8	9625.16	4275.36	6488.43	4130.23	5164.57	31884.8	8459.24	16180.1	52091.8	6069.88	17670.7	21835.5	4702.59	17256.2	23459.3	16065.7	36590.8	4799.45	25105	29822	241680	36178.6	292400	36700.7	53450.9		20491.3	96990.6	34715.5	70429	50872.1	20754.1	110508
DG(22:00)_[M+H-H2O]1+	411.347	2.65469	0	4429.69	1201.13	3917.9	2682.14	6328.82	11844	4600.67	8852.15	1574.16	5712.78	9046.26	4334.28	17381.8	6280.18	1264.17	2987.34	2436.29	3251.89	20213.8	4911.44	11128.9	4249.15	3092.33	12526.7	14934.1	1639.01	12028.1	14962.1	10873.2	24773.7	3359.55	15687.5	20441	152104	23511.2	191192	22964.2	35176		11954.5	63879.5	22653.5	44915	34076.1	13333.8	71215.5
DG(23:00)_[M+H-H2O]1+	425.363	6.24806	0.425	0	62.0767	0	0	164.955	90.2983	0	0	0	0	0	0	0	64.6991	0	0	60.902	56.5949	142.904	62.2861	74.2696	0	58.6592	0	0	0	0	65.4708	166.702	320.442	0	175.745	144.365	5789.96	163.372	6822.2	126.692	240.997		0	628.292	239.721	599.95	372.803	0	1821.52
DG(24:00)_[M+H-H2O]1+	439.378	2.79739	0	2185.76	658.71	2053.75	1308.82	4763.1	6979.11	2324.67	5049.31	678.586	2625.87	6387.83	2067.56	9049.21	4464.05	963.695	1475.06	975.517	1086.68	9503.05	1861.22	6131.19	1894.95	787.24	7072.43	7429.98	616.925	6517.78	7564.45	5787.5	13013.3	1293.88	9691.55	11817.6	80783.8	13135.5	96863.9	12531.2	18299		6024.72	35636.1	12602	23807.6	16916.3	6242.67	36778.2
DG(24:01)_[M+H-H2O]1+	437.363	3.25662	0.05	435.74	0	79.2678	165.095	755.83	1424.48	385.427	1153.7	0	141.14	879.626	208.61	3243.5	429.65	81.0921	421.692	69.9724	229.013	4559.02	276.154	1340.03	126.226	200.226	1317.73	2034.88	0	983.903	2206.65	1813.87	5162.01	151.274	2305.8	3525.29	34653.3	5132.72	43553.4	4792.91	7519.01		1627.87	14617.6	5361.68	11050.2	7463.23	2379.03	16515.6
DG(25:00)_[M+H-H2O]1+	453.394	6.45922	0.45	0	0	0	57.3299	0	75.2141	0	61.0658	0	0	0	0	0	0	206.614	9.66491	0	0	0	55.8615	0	69.158	0	0	0	0	63.0822	65.542	64.1644	260.563	0	128.384	70.5097	5058.44	127.498	5965.06	305.858	230.938		58.2415	2041.71	68.4818	171.72	339.469	68.2171	1520.15
DG(26:00)_[M+H-H2O]1+	467.409	2.00433	0	2566.64	306.281	1671.24	949.586	3025.67	6712.78	2366.98	4446.78	1277.79	2736.73	6472.57	2120.78	9804.29	2926.54	1013.34	1871.85	859.027	1316.06	10717.1	1558.55	5043.33	2213.38	884.695	6287.6	7544.18	615.958	6143.46	8389.82	6303.75	14122.6	1051.94	8906.63	12512.6	85049.7	14792.1	101350	11165.3	18071		6247.79	38056.6	13142.4	24997.9	18282.7	7904.56	37908.2
DG(26:01)_[M+H-H2O]1+	465.394	2.65686	0.05	316.48	141.91	134.345	158.591	590.21	701.561	72.5744	428.875	294.203	53.5451	793.527	387.525	2055.09	119.376	223.377	362.979	276.887	131.76	2037.39	253.505	480.394	56.8206	0	1496.72	1664.76	64.6089	908.833	1449.4	930.108	3200.7	168.135	1776.08	2546.08	25187.6	2905.46	31260.9	2920.04	5382.34		945.62	11131.9	2987.41	6157.11	5258.69	1085.62	12099.7
DG(26:02)_[M+H-H2O]1+	463.379	4.72975	0.375	0	0	55.914	60.0487	117.02	208.568	110.672	83.631	0	0	62.0846	78.1875	81.5319	142.774	62.6075	0	0	0	0	0	144.169	0	0	0	0	73.4196	69.8566	0	0	165.759	190.367	0	0	875.259	123.033	1585.34	65.0025	704.562		61.3588	148.661	0	117.22	102.253	62.0234	303.919
DG(28:00)_[M+H-H2O]1+	495.441	2.96732	0	2824.26	822.679	2310.82	2742.35	4245.99	6736.52	2394.97	4750.15	1208.25	3255.68	6481.79	1713.42	10276.9	3372.8	2001.37	1609.2	1281.4	1512.58	12187.6	2907.8	6104.46	4425.29	802.449	7773.23	8166.7	1139.83	6739.63	9398.35	6534.84	14203.2	1550.87	10490.4	11995.5	88446.2	14738.8	103426	12271.6	19994.8		7110.13	38885.8	13769.3	25485.9	18670.4	8698.43	38280.6
DG(28:01)_[M+H-H2O]1+	493.425	2.49515	0.0125	383.805	57.9968	66.4721	148.339	820.377	1331.77	433.11	975.942	62.5532	473.906	841.802	344.191	2335.87	197.667	181.955	308.672	129.307	124.358	3655.34	311.046	1172.91	658.07	121.434	897.169	2626.48	0	1566.7	1841.28	752.067	4578.59	145.91	3313.78	3978.52	33109.5	5216.42	42001.4	3208.76	7287.87		2082.51	14376.3	4594.77	9231.05	7113.54	1410.76	14256.7
DG(28:02)_[M+H-H2O]1+	491.409	4.29736	0.3875	0	0	0	61.2033	80.9577	117.829	0	0	0	0	0	67.5921	155.729	72.9023	0	0	0	57.7843	127.48	0	59.9801	0	0	62.8532	0	0	66.9678	378.222	68.3393	230.162	0	203.922	290.154	4425.62	368.166	7198.56	491.028	471.103		131.854	1156.12	63.0887	643.988	277.548	0	1611.25
DG(29:00)_[M+H-H2O]1+	509.456	2.4645	0.05	482.564	67.7126	545.086	1414.6	483.168	419.96	134.5	621.591	216.767	128.118	1182.46	165.466	291.569	709.318	816.088	67.3387	55.5004	0	704.859	159.35	233.255	156.541	0	493.364	134.235	181.519	386.412	148.585	329.546	1066.44	69.8208	757.343	915.655	10423	1043.82	11615.6	678.456	1408.61		393.771	3318.87	1384.5	2409.92	1223.13	543.235	4394.55
DG(30:00)_[M+H-H2O]1+	523.472	2.30953	0	10001.5	4627.34	8094.27	10582.7	10798	14613.9	8249.59	12060.4	7753.59	8759.8	11958.5	8492.09	18367	11525.1	9044.38	7674.41	5413.08	5575.2	21184.2	7959.61	15086.9	10608	4907.4	17166.6	16276.8	5081.51	13443	19743.3	12990.9	28102.9	5902.6	21422	23183.8	147507	25621.4	170423	23920.1	35394.1		15352.6	67760.3	26075.5	45031.1	33090.3	15932.7	67094.1
DG(30:01)_[M+H-H2O]1+	521.456	2.49806	0	2138.35	666.829	1674.51	2929.64	2827.6	3056.1	1122.62	2731.11	1052.05	1496.92	4530.51	1615.36	5165.54	2210.32	468.995	1483.03	1343.54	1315.73	6222.13	2171.55	3677.15	3019.55	533.773	4222.67	4972.56	562.407	4025.98	4790.74	3676.35	7768.48	1053.4	5925.71	7080.83	42331.1	7925	52443.5	7886.71	11639.4		3831.37	20239.7	7341.82	14056.7	9859.89	3444.33	20276.9
DG(30:02)_[M+H-H2O]1+	519.441	3.85361	0.275	72.2054	0	0	74.0845	78.7424	0	58.6165	146.216	0	123.995	213.796	0	86.1803	277.199	69.3902	0	0	0	93.3503	0	79.0823	0	0	274.276	183.651	57.8088	82.4163	138.914	0	173.641	80.952	68.6156	73.6031	4052.08	281.934	6066.29	311.324	390.404		80.6256	1110.03	163.126	537.865	148.036	127.866	995.248
DG(31:00)_[M+H-H2O]1+	537.488	2.03416	0	2379.05	559.492	1332.06	3701.22	809.468	2445.47	714.556	2790.32	1179.35	1322.13	3844.24	982.017	2618.19	2307.25	3941.29	1460.86	231.358	342.387	3316.13	579.41	2700.24	1114.83	123.042	2731.97	2434.85	438.031	1720.99	2253.92	2540.66	5536.25	486.272	4327.92	3651.62	23807.3	4923.61	26633.5	4254.07	6216.97		2442.58	10696	4047.27	7668.99	5369.4	2564.64	11189.4
DG(31:01)_[M+H-H2O]1+	535.472	3.82256	0.175	60.158	140.32	308.478	603.937	240.191	432.292	73.9145	243.471	0	123.454	994.986	0	191.628	70.0206	201.871	97.9744	96.1402	0	213.521	69.9935	65.3818	59.5015	0	389.14	0	0	0	57.923	74.7666	572.008	62.5829	222.233	57.6778	2928.44	434.311	4516.85	271.362	247.115		77.4875	910.847	85.0499	458.238	351.892	136.014	1651.41
DG(32:00)_[M+H-H2O]1+	551.503	2.90116	0	27106.7	16080.7	20626.1	25884.5	24775.7	35003.6	20166.5	29238.5	21963.6	21653.8	27613.5	21246.4	39266.6	29213.4	20447.9	20822.1	16282.2	16783.2	45583	23705.1	31574.5	28928.2	11423.5	39726.5	36512.6	13959.1	32513.2	41072.3	33827.5	59421.3	18649.1	45484.9	45907.4	237718	49691.9	267992	50026.6	67483.6		33345.5	116301	49687.4	77594	59899.9	34111.6	112398
DG(32:01)_[M+H-H2O]1+	549.488	2.63758	0	12633.8	9723.63	12276	13997.7	14056.1	18362.5	11676.5	14329.3	13808.5	12149.2	16682.9	11705.3	18334.3	16194.7	10620.1	11355.7	10641.8	10401.6	22640.5	13166.5	19008.7	18204.5	6585.21	22629.6	20203.8	8568.57	18459.9	20467.8	18126.3	30450.8	11097.3	22696.4	23816.5	88935.7	23238.8	104663	26960.7	33954.7		18782.2	46782.7	22755.4	35086.3	26741.3	17063.7	49323.9
DG(32:02)_[M+H-H2O]1+	547.472	2.33315	0	2440.37	981.437	2140.41	2848.9	2759.43	4289.86	1817.64	2582.55	3832.59	1489.93	3249.12	1490.31	2613.4	2674.85	1208.2	2410.18	862.595	2189.41	4056.88	2280.09	3888.7	3573.96	505.468	5124.34	3836.04	491.281	3146.45	4364.99	3485.19	6837.8	1988.02	5311.93	4187.49	15738.8	4382.53	18624.9	6638.73	6325.74		4364.83	7778.97	4105.27	7049.98	4875.22	2672.52	9845.07
DG(33:00)_[M+H-H2O]1+	565.519	2.58366	0.0125	1034.73	79.4444	160.028	1342.45	384.033	1375.63	88.1185	1184.13	575.187	549.698	1072.01	474.837	1148.41	314.526	1044.48	801.785	68.8365	84.5399	1982.05	377.654	856.593	630.041	152.471	1435.48	1232.66	0	679.4	1537.15	1582.48	2714.15	218.873	1884.87	1659.88	15007.5	2162.37	18645.4	1757.92	3556.72		721.818	7745.49	2095.74	4433.19	2640.94	1328.25	7911.87
DG(33:01)_[M+H-H2O]1+	563.503	2.3025	0	880.512	286.794	1013.43	1673.81	953.913	1734.69	176.877	1284.9	608.518	675.99	1990.69	446.431	890.258	486.724	316.149	546.847	384.569	284.653	2303.48	620.832	960.33	1232.54	449.11	1587.53	1568.49	58.4452	1046.38	1647.38	1238.05	3029.85	413.647	1955.91	2023.15	12616.8	2654.95	16376.7	2334.67	3864.3		1018.73	7109	1600.52	3302.76	2089.7	1294.48	6383.35
DG(33:02)_[M+H-H2O]1+	561.488	2.96572	0.1	76.9182	198.59	76.057	170.04	246.808	164.677	67.6141	0	96.2327	61.5988	154.261	73.5748	135.731	160.443	153.749	338.188	72.8339	0	183.811	108.608	242.657	181.63	95.3348	529.668	107.172	0	166.067	213.945	262.636	403.251	153.177	287.411	148.429	792.168	0	1110.28	607.352	691.744		0	284.931	76.3964	177.686	141.873	154.851	541.315
DG(34:00)_[M+H-H2O]1+	579.535	4.94044	0	12209.2	7706.64	8503.29	9937.64	10816.2	14622.9	8206.79	11718.4	10659.4	9335.55	13110.5	9357.59	15817.9	13804.1	8300.17	8373.58	8295.8	8426.66	19065.2	10111.9	14662.9	12766.9	4400.03	16688.7	15671.3	6812.57	13894	17367.2	14980.4	25865.3	8141.15	19622.1	21524.8	99548.3	23045.8	105585	21455.1	25879.4		14302.9	48045.7	21119.1	33366.3	24934.8	14452.5	44496.4
DG(34:01)_[M+H-H2O]1+	577.519	2.91439	0	84595.9	64138	70684.2	77918	86870.2	105687	59989.5	83480	96601.7	71177.3	87139.7	77142.3	87624.9	101424	65312.2	72579.8	72774.7	77358.7	118107	90740.4	112999	114568	39259	129990	109990	58872.8	102048	114027	97812.7	152650	69816.6	125291	109245	230241	110262	241277	145455	146312		100762	147378	99539.7	136363	102558	88965.5	169065
DG(34:02)_[M+H-H2O]1+	575.503	2.55857	0	38204.2	29196.2	32770.4	34265.6	40540.1	50276.2	29829.8	39031.6	45119.1	30448.3	38458.3	33898.3	34917.5	47888.3	30957.8	32244.8	33950.5	35762	54932.3	43211.7	56022.9	58260.9	20880.7	65717	49435.9	29505.9	47022.1	54477.6	49606.9	72427.2	36795.7	61307.5	46679.9	63255.2	45435	61191.1	67337.2	66594.8		51682.1	49338.5	45154.1	55255.8	42343.4	48289.2	65756.6
DG(34:03)_[M+H-H2O]1+	573.488	1.99151	0	5357.93	3478.31	3450.01	3648.05	5079.75	7412.38	3873.14	5195.77	5807.26	3520.65	4881.47	4531.24	4280.43	6861.74	4211.76	4708.9	3844.91	4148.83	7101.93	5750.8	7548.38	8645.79	1591.97	9789.9	6395.12	2484.57	6380.12	7257.14	7101.62	10153.6	4893.64	8312.17	5496.14	8366.74	6419.24	8154.17	10703	9720.23		6867.11	5889.61	5658.19	6968.78	5630.66	8749.1	9664.25
DG(35:01)_[M+H-H2O]1+	591.535	2.56914	0.025	363.972	74.3438	429.437	524.465	718.636	442.773	144.717	398.202	248.305	68.4916	687.275	386.692	643.259	348.155	310.515	170.792	84.9935	165.469	454.132	499.544	495.705	629.499	73.2221	268.845	803.014	179.728	509.763	660.99	515.117	1955.05	123.11	791.996	840.152	6654.04	1637.59	7992.86	1086.52	1814.23		459.963	2688.74	405.978	1205.2	768.295	497.865	2930.42
DG(35:02)_[M+H-H2O]1+	589.519	2.97433	0.1	127.787	142.192	67.3289	0	291.223	299.674	108.823	0	223.914	102.214	340.18	87.0523	203.162	270.375	148.513	69.9002	134.549	0	285.49	79.3886	252.124	210.093	140.364	359.156	149.886	109.053	130.191	233.939	272.823	724.39	0	339.17	355.115	2225.55	294.047	2177.12	568.102	660.27		85.4971	802.532	442.046	900.749	174.146	478.145	909.003
DG(35:05)	618.51	8.93737	0	2696.55	1753.67	2347.69	2685.34	3548.96	5134	2703.61	3223.73	3421.31	2423.48	3118.31	2758.68	3096.29	5826.63	3074.06	2586.55	1087.54	1742.37	2811.53	2338.62	3504.22	2799.62	174.411	6430.04	2027.99	284.372	1762.52	3535.06	2928.46	6084.02	2495.78	4982.41	1861.53	1634.87	2864.93	1906.79	3843.93	4966.09		2639.59	1669.48	1761.52	2631.73	2111.73	2607.35	4281
DG(36:00)_[M+H-H2O]1+	607.566	8.18895	0	1407.1	209.067	794.908	985.544	972.371	1514.44	225.561	449.608	1457.53	1033.87	1060.92	857.511	1210.96	1027.31	619.636	690.871	565.35	411.021	2020.04	684.542	701.661	1183.46	129.351	1508.43	2791.68	366.061	1121.83	1135.6	1709.87	2710.01	398.245	1807.02	2428.88	11824.1	2585.43	12542.5	1916.64	2363.56		646.051	6002.42	2055.21	3612.34	2192.37	937.35	5474.16
DG(36:01)_[M+H-H2O]1+	605.55	3.40652	0	24077.3	13706.9	15708.6	22712	18409.7	25848.7	12110.5	18257.9	20021.2	16213	24111.7	15635.3	19600.8	20394.4	14420.7	15270.3	17182.9	18268.7	29217.4	19951	22727.4	23854.4	8546.45	27564.8	32538.1	18443.7	21696.2	24523.2	26613.8	34056	12633.8	25427.5	24678.2	52923.8	26536.8	48048.2	34072.4	26484.1		20199.8	35463.7	23134.8	31721.3	22615.8	19488	33502.6
DG(36:03)_[M+H-H2O]1+	601.519	2.98811	0	41649.2	30781	32865.5	36045.7	42437	52893.2	31444	41364.6	45850	31167.3	38636.6	36049.2	35929	51797	32394.3	36734	31013.4	31353.9	44375.6	40497.8	48705	52900.7	18734.6	61408.2	42420.7	25762	40265.5	48021.2	45205.2	63046.7	34364.1	59972.2	38652	41239.6	41240.6	35667.4	61068.8	56501.1		45313.6	36989.2	36288.7	43643.6	37374.2	38967.4	53985.7
DG(36:04)_[M+H-H2O]1+	599.503	2.98559	0	18984.8	13171	15785.7	17699.6	21133.4	24330	12407.4	19190.3	21661.6	15903.8	20744.9	16366	16835.6	24705.6	16181.3	16513.6	16055	15732.4	22768.5	20068.2	24168.2	26584.3	8545.33	27834.3	23017.5	14386.6	20554	24805.8	23410.2	32864.9	16216.5	25954.8	19465.8	20886.2	20073.8	15948.4	30819.1	26456.8		23363	17586.1	18935.9	21954.8	17407.4	21141.7	24093.1
DG(36:05)_[M+H-H2O]1+	597.488	2.23083	0	239.375	582.818	583.632	515.827	1026.47	1978.44	550.665	740.881	1228.02	479.829	853.284	610.099	916.917	1592.54	459.382	562.373	364.531	374.21	1335.97	762.108	852.465	1367.42	77.9293	2020.64	613.894	198.124	587.52	879.061	1437.2	2005.06	737.575	1670.12	633.656	818.386	725.429	627.202	1702.73	2225.88		1309.45	435.006	524.309	928.296	588.585	1852.62	1798.89
DG(38:03)_[M+H-H2O]1+	629.55	4.92415	0	1893.61	1028.43	1271.1	2224.84	1346.92	1188.68	209.167	722.728	1325.65	1131.93	2781.6	584.908	1035.57	1377.19	959.887	434.411	3526.21	3544.1	5348.18	3472.11	4104.44	4460.36	458.437	4214.01	6650.72	2937.63	4469.31	4798.97	5030.73	6580.53	1599.36	3832.22	4216.46	4154.01	3477.19	5287.06	5570.16	1261.97		3325.01	3637.72	3843.71	5467.57	2991.58	3090.38	2913.75
DG(38:04)_[M+H-H2O]1+	627.535	2.24284	0	20664.2	10680	12750.2	24225.2	13417	19105.7	8613.01	12195.4	13125.6	11071.9	27802.3	11079.7	15041.6	13504.1	11779.9	7739.77	25512.9	26552.6	35069.6	24807.6	29336.2	29191.4	11305.7	31282.3	42363.5	26469.3	26281.1	31609.8	31997.8	37672.6	15189.3	26286.1	30048	28778.1	25664.4	13027.2	40592.7	15942.6		24482.4	26634.5	26369.1	34593.2	22854.9	23353.6	27817.1
DG(38:05)_[M+H-H2O]1+	625.519	3.42485	0	3050.08	1678.3	2287.49	3628.5	3076.37	3234.14	1032.42	1240.3	2098.21	1755.71	4831.29	2285.49	3070.62	3356.77	1078.6	889.644	4942.03	5637.92	7255.85	5354.34	6515.32	6922.62	770.801	6987.6	8571.29	4409.93	5470.24	6613.02	5982.72	7977.09	2488.11	5656.04	5706.5	5023.18	5262.06	2372.63	8483.12	5518.14		5266.24	5436.4	5302.58	8184.39	4318.09	4157.8	5442.28
DG(38:06)_[M+H-H2O]1+	623.503	2.0187	0	758.879	136.134	356.962	535.151	1024.14	1100	159.208	811.855	535.689	79.6222	619.709	404.922	486.518	124.112	656.706	161.559	922.783	1300.8	1616.22	881.19	1628.58	1745.89	75.658	1533.56	1665.62	782.379	1658.54	2128.16	1780.14	2330.45	455.58	1043.51	1287.84	1370.06	990.017	603.788	2401.1	1454.22		1091.56	764.744	748.354	1727.73	372.06	716.75	1020.85
DG(40:03)_[M+H-H2O]1+	657.582	6.0829	0.175	90.8763	0	0	0	173.925	88.8039	72.926	355.923	0	157.015	86.3787	0	314.518	185.617	0	175.143	0	16.8559	460.721	0	177.049	0	0	664.949	186.033	71.227	217.911	244.315	330.94	1619.09	112.573	501.439	605.981	16192.1	829.408	23419	887.681	2982.7		242.97	5162.92	450.897	2907.47	2213.23	212.052	7995.86
DG(40:04)_[M+H-H2O]1+	655.566	3.60689	0.0125	390.313	114.975	208.11	432.47	190.101	209.826	175.179	151.915	258.128	182.854	923.001	73.3384	447.92	80.5091	298.096	0	1079.88	1283.26	2469.44	1345.42	2241.3	1341.95	198.388	973.413	3008.54	1245.76	1078.87	1948.85	1637.02	2349.24	578.866	941.691	1592.37	2467.7	1543.83	4018.91	2824.87	151.012		606.645	1069.21	1216.1	2774.44	732.752	614.496	719.138
DG(40:05)_[M+H-H2O]1+	653.55	2.97886	0	740.628	142.074	445.323	1244.37	499.299	150.68	87.1371	572.3	342.212	138.855	757.256	315.182	676.647	322.904	321.14	196.604	1715.12	1578.81	3827.98	1741.46	2219.8	2107.07	83.5818	1684.45	3795.56	1217.37	2233.28	2319.79	1820.18	3004.37	847.329	1897.35	2445.48	2020.79	2046.69	316.166	3935.84	391.549		1585.45	2163.33	2069.88	3815.97	1174.18	1363.59	1680.59
DG(40:07)_[M+H-H2O]1+	649.519	4.56748	0.375	0	87.6601	0	87.2011	103.162	0	134.379	0	0	0	0	0	0	0	0	0	0	78.1337	150.15	68.5175	0	184.746	0	331.965	170.617	0	88.3461	0	0	237.902	64.7027	0	139.47	0	68.387	0	84.7363	225.609		81.154	77.5413	61.7206	134.748	58.6962	66.6711	0
DG(42:03)_[M+H-H2O]1+	685.613	4.43933	0.1875	80.2144	77.2178	0	0.278187	156.79	322.621	95.5995	69.3919	0	0	164.918	0	417.361	0	0	126.619	0	0	694.251	217.307	211.998	79.4468	72.3764	421.602	149.172	0	146.082	72.3609	174.888	1738.62	0	635.212	819.251	17089.2	1194.98	22845.7	865.867	3747.26		318.382	4706.98	1045.19	3616.47	2196.25	435.131	7174.11
DG(42:04)_[M+H-H2O]1+	683.597	6.26503	0.3125	0	0	0	0	108.078	80.4187	171.316	151.001	0	0	0	0	346.127	0	63.778	0	0	66.0571	202.632	76.3806	71.4978	0	0	407.638	226.188	0	131.112	195.805	0	1013.74	96.0689	282.268	522.018	11036.3	250.402	16686	379.644	1752.78		160.402	2800.58	378.758	2587.91	1093.7	168.388	4762.17
DG(44:03)_[M+H-H2O]1+	713.644	4.59913	0.2875	105.279	92.056	0	0	0	0	0	71.3489	0	0	143.658	0	182.212	0	248.685	0	0	0	277.913	95.622	0	0	0	90.9567	82.3389	0	98.6287	198.977	91.1285	457.072	0	86.9567	344.219	12330.7	679.958	16502.2	417.55	1510.68		343.412	3230.33	419.671	1518.27	927.582	268.358	5006.26
DG(44:04)_[M+H-H2O]1+	711.629	5.17332	0.3375	0	0	158.876	93.7967	0	0	39.7893	0	0	88.3881	0	85.4819	115.203	74.2491	139.961	0	0	0	261.127	67.0211	66.2475	0	60.0033	164.303	0	0	0	65.6652	70.7219	377.832	117.209	174.081	76.4335	8927.09	545.22	13648.9	463.062	932.282		0	2126.44	131.466	1231.75	533.99	100.225	4109.21
Hydroxycholesterol)_[M+H-2H2O]1+ & Desmosterol_[M+H-H2O]1+	367.336	3.35162	0	16754.5	13387.9	15737.8	19344.9	20349.6	29169.7	16417.4	18725.9	21192.7	15353.9	16367.6	17981.1	12870.6	27143.7	22505.1	17848.1	17437.5	18195.6	24607.4	22175.4	31175.3	31149.7	9851.87	36701.9	21724.9	12353.1	27125.4	26740.6	24472	35523.6	19055.4	29317.7	23521.7	16595	19923.7	13405.1	38886.2	36321.7		26573.4	16926.1	20463.4	19040	18245.8	18598.9	32413.7
LPC(16:00)	496.34	2.53169	0	40212	30460.5	43566.8	56184.7	56214.2	88712.4	46683.2	56586.4	49386.6	34524	46424.5	55582.8	52455.8	74497.5	60986.1	54033.9	30174.6	28622.7	44195.2	44048.8	50717.3	53424.7	20132.9	73478.8	37730.8	23356.2	43893.2	47193.4	43401.5	57023.2	35095.5	51423.2	38700.8	30998.8	36327.7	21086.7	66786.5	56112.7		52747.8	28611.8	32883.9	39972.2	33149.2	52877.7	52779.1
LPC(18:00) & PC-O(18:00)	524.372	3.08099	0	19134.5	14110.2	20281.4	27520.3	31193.8	42904.2	23246.3	27809.7	23109.1	14135.4	23143.5	29270.1	25747.7	38542.2	30950.6	26112.4	16367.4	16647.1	26433.1	28594	32323.9	32995.9	11157.7	48685.6	21681.9	14160.9	24931.3	30455.1	27157.9	36389	19896.3	32722.7	21901.2	18426.1	20580.3	12474.8	39267.8	34815.3		35583.5	16564.1	19689.8	23326.5	20595.4	24839	33671.6
LPC(18:01) & PC-P(18:00)	522.356	2.40876	0	5455.69	3306.03	5549.1	7716.55	7289.38	11988.2	4953.79	7734.92	6484.47	3804.98	6574.25	7425.11	6590.54	9784.25	8188.98	6133.58	4673.39	3899.1	6289.88	7593.59	9255.65	8344.37	1667.5	10260.3	5100.39	2889.7	5866.99	7234.65	5999.54	8998.71	5259.39	7682.96	5032.4	3993.53	5038.48	2256.8	11207.4	8334.51		7496.5	3691.27	4292.18	4579.8	4431.79	8079.26	8726.78
LPC(18:02)	520.34	2.81284	0	4805.4	3393.33	6133.06	7090.09	6639.79	12317.6	6063.73	7324.48	7243.26	4553.86	5520.36	7595.61	6818.11	10055.2	7444.82	7018.13	3838.53	3189.83	5347.76	5382.54	7592.52	7605.78	1352.99	8325.51	4087.29	1696.58	6120.68	6480.68	5669.05	7443.76	4227.42	6709.19	5166.32	3170.73	4011.11	2120.8	9069.78	8480.49		6905.08	3147.5	4049.9	4982.33	3836.2	13960.8	7907.42
LPC(20:04)	544.34	2.40559	0.0125	441.151	56.7229	638.869	562.726	390.213	1466.86	489.606	426.647	750	283.819	1222.16	335.257	587.656	982.906	1000.05	736.232	146.315	134.751	749.103	730.229	1413.34	803.699	0	1160.47	513.616	63.3536	563.412	552.491	581.656	820.461	146.312	1167.75	485.427	133.114	453.149	186.5	1155.03	657.052		605.086	211.611	66.7032	362.271	403.165	535.838	989.057
LPC-O(16:00)	482.361	4.85358	0.1375	63.6063	199.168	293.446	380.895	311.318	653.205	152.345	455.176	0	0	189.1	288.552	186.146	190.871	229.66	156.298	0	51.4126	176.073	158.223	220.7	134.623	0	335.418	69.2187	60.0349	284.83	462.846	203.752	72.2011	0	89.9409	130.152	244.957	0	63.5261	519.286	95.3453		155.73	0	174.472	86.9388	183.501	128.511	332.604
LPC-O(18:01)_[M+H]1+	508.376	3.03909	0.25	61.4889	110.094	76.6769	259.614	208.469	732.634	68.9493	124.217	0	50.7619	0	87.9692	216.875	458.971	75.5228	93.8782	87.1558	0	164.974	67.0822	215.04	0	71.041	311.342	0	0	0	134.481	0	156.279	63.8988	146.683	225.279	71.2092	0	79.0038	284.811	269.779		138.66	64.3939	152.254	69.5733	194.036	0	255.56
LPC-O(18:02) & LPC-P(18:01)	506.361	2.42056	0.05	0	243.371	319.54	411.292	249.455	351.371	62.5848	170.014	167.588	110.781	340.303	155.094	432.537	293.235	324.923	211.209	1055.21	74.2389	660.866	819.383	1035.19	133.567	0	628.576	828.533	289.668	535.368	603.419	537.233	1172.52	292.325	750.548	1085.28	226.241	626.41	0	1651.01	1105.43		567.803	620.987	408.952	939.591	534.726	364.687	712.834
LPC-P(16:01)	478.33	2.92685	0	916.574	1033.91	1531.7	2880.33	1840.98	4675.89	635.74	1947.27	2341.67	1313.9	2196.13	1969.95	1837.84	3132.16	2288.26	1110.06	3659.47	2311.36	4668.63	3849.1	4192.62	3623.36	409.646	4003.6	3836.37	1266.18	3375.66	3612.18	2667.58	4993.14	1800.26	3355.95	4409.88	1888.67	2884.22	650.01	5691.38	5086.09		1587.54	3121.16	2006.86	4021.1	2268.97	3390.05	3735.61
LPE(18:04)_[M+H]1+	474.262	4.89854	0.075	11073.6	1097.89	59.8031	258.307	239.737	685.963	1208.64	2385.97	6974.01	259.147	84.2202	105.638	73.4553	1381.02	17124.9	2783.11	1995.61	64.9351	505.157	1516.7	343.602	1330.1	48820.7	3212.58	1412.72	58.6305	0	99.7497	1492.39	3967.26	270.244	4078.98	1298.05	1115.38	4842.17	12868.4	4563.22	5404.74		28041.4	583.704	252.679	3421.62	4708.87	121.415	1163.64
LPE(22:06)_[M+H]1+	526.293	7.32236	0.4	0	0	0	46.1755	0	0	0	0	0	0	0	0	0	46.3924	67.11	62.4319	0	685.161	2346.04	62.7755	309.717	871.497	0	1030.21	0	0	77.0754	0	0	0	320.369	0	80.1855	1214.64	0	0	532.697	63.6004		0	543.225	67.7161	185.55	0	0	5551.17
Oxocholesterol)_[M+H-H2O]1+	383.331	3.355	0	29978.4	24465.9	25855.9	31290.5	31907	43853.2	24031.6	29978.1	38261.6	27245.6	26592.4	31327.3	20405.9	43481.4	30557.6	27310.1	33972.3	32961.6	43232.3	35988.7	52753.3	52091.8	14944.9	61551.5	39368.8	22478.4	44982	44058.1	40606.1	59192.8	33218.9	47714.1	40380.5	29977.6	35571.2	23374.3	62222.1	57520.9		42869.2	29911.6	33841	34957.5	28956.1	30216.4	52498.6
PA(41:04)_[M+Na]1+	789.54	7.4917	0	2361.15	1808.19	2549.55	3873.71	5841.54	8315.16	3016.02	5195.26	5932.6	1668.27	3864.49	4277.47	4134.42	8110.43	3993.31	3444.42	2405.06	3290.3	5863.56	5349.6	7734.63	7997.78	834.285	12031.6	4154.23	2088.4	5449.64	7882.93	6053.92	10383.5	5055.76	9815.55	2766.7	2500.39	3492.68	1576.73	9146.89	7583.34		7561.05	2032.19	3227.37	3483.2	3126.67	4549.94	7612.69
PC(32:00) & PE(35:00)	734.57	3.80325	0	34577.4	19755.4	24217.5	36304.5	33955.3	50066.9	23806.4	32689.1	38227.5	19429.6	35108.7	29174.2	32496.6	44615.4	33095.3	27324.7	22514.8	29312.2	43323.8	39053	48677.7	55487.3	18114.8	76037.6	40947.5	24866.1	37122.2	45500.1	48192.1	65793.8	32268	54866.8	32162.3	30519.9	28497.8	18164.9	68382.5	52756.4		59345.3	21233.9	31460.6	38094.8	31034.4	34035.9	53660.9
PC(32:01) & PE(35:01)	732.554	3.59871	0	7049.04	3612.79	5205.43	7326.2	8202.92	11714.6	5064.81	6468.15	7591.47	3305.44	7030.06	6012.76	7053.22	10694.9	7209.52	6129.93	5195.8	6181.06	9786.09	9356.94	11134.5	13624.7	2909.76	16987.4	8246.81	4731.3	9032.65	11106	11179.8	15031.7	7942.72	12400	6510.17	6257.97	5965.07	3845.52	16715.6	13444.6		13869.8	4553.51	7384.85	7583.15	6216.48	7342.6	12532.6
PC(34:01) & PE(37:01)	760.586	1.8752	0	118260	68655.8	85800.8	127236	120718	180137	80985.9	113456	133208	69191.3	124471	100142	105151	161372	115104	97431.3	83180.1	97703.1	143738	136918	173124	181308	55833.9	261085	131492	82476.8	130080	153221	156849	226458	109717	189981	112419	102416	103990	64589.4	246051	195119		192736	79752.4	106184	124676	103429	111756	184268
PC(34:02) & PE(37:02)	758.57	2.18998	0	179362	122027	152709	181004	216312	292715	150587	197293	238267	119655	172322	181308	182413	284237	197901	170666	157923	185454	261153	254336	322994	342636	102826	459712	224098	140289	244702	288135	265325	399703	219315	352185	207309	177656	187093	119198	423052	360672		350584	153183	202957	226540	190779	212569	342633
PC(34:03) & PE(37:03)	756.554	2.37095	0	10079.8	7031.09	10384.1	11207.5	15736.3	20074.6	9879.46	13339.6	13437.9	7699.85	10219.8	13378.2	11426.7	18465.8	11736	10844.8	10980.9	12239.1	17673.2	17876.5	23695.2	25019.2	5450.91	27785.6	14043.4	7785.32	18331.6	19927.1	16962.9	24717.2	15297.3	21590.7	15429.8	11421.8	12927.2	8467.96	28472.9	24257.7		23456.4	8989.01	14568.1	14678.3	13221.8	16400.9	22192.6
PC(36:01) & PE(39:01)	788.617	2.07959	0	38384	18885.6	21621.6	36955.5	27652.9	45127.2	19444.3	26965.6	33233.9	18249	38669	23999.1	29247.1	37507	27579.1	25450	20383	27517.3	36743.5	33890.8	39007.6	43294.1	14741.9	60093.7	39190.5	24311.2	31836.6	37005	42800.9	53015.9	24577.4	45050.2	26458.4	27042.7	24217.5	15706.3	60968.5	43284.9		45971.9	20309.6	27819.1	32751.4	23631.7	28383.2	41427.4
PC(36:02) & PE(39:02)	786.601	2.58867	0	126553	81986.9	99441.2	124316	135719	187025	94441.3	125271	159723	80082.4	121873	116986	116546	170735	121641	112177	104031	120436	167634	159415	200806	211782	65277.7	275658	150210	93087.8	159873	181568	174019	245014	133999	216987	134403	118620	120981	76250.2	263909	216903		215882	99234.6	132087	148226	122446	136592	205168
PC(36:03) & PE(39:03)	784.586	2.45352	0	51596.1	35651.7	39426.3	52385.1	60413.5	80314.8	40666.8	56079.6	68036.3	35219.1	52343.3	51062.8	51474.7	74232.4	50565.7	48988.9	46037	49743.5	72566.8	70127.6	89008.6	95761.2	29633.1	118448	65467.9	39307.5	69652.3	80534.9	76402.9	109554	60040.5	95792.4	59391.2	49384.6	53084.6	34240.7	117663	96669.2		92573.3	42074.1	56866.5	64107.9	54047.4	60698.9	89871.5
PC(36:04) & PE(39:04)	782.57	2.04455	0	89903.6	54329.4	63134.2	88767.9	83768.8	126266	60633	80342.1	102161	53796.2	84183.6	76428.6	76262.3	106170	72545.1	77056.9	65931.9	78197.2	109100	104435	134341	144485	43969.1	186122	100392	63559.4	104522	118678	119299	164457	91168.3	141132	88047	79316	81784.4	49011.8	173523	144565		142928	64449.9	85036	99210.4	81801.3	94764.9	137439
PC(36:05) & PE(39:05)	780.554	4.98524	0	20816.9	10673.5	10167.7	12807	11601.8	14107.4	7271.04	10167.3	31416.2	11134.4	12240.8	14995.4	12328.6	14887.6	7115	14566.3	14965.4	13877.9	20059.4	14590.2	29743.5	16029.4	2608.42	17135.8	18283.8	11936.4	19928.9	19834.5	15063.1	20059	8913.67	15039.3	18834.8	14531	15016.8	5685.16	22540.6	16375.2		16377.1	14357.5	12878.2	17230.8	10908.9	12940	16843.9
PC(38:03) & PE(41:03)	812.617	2.06893	0	10186.5	5753.43	5808.62	8958.41	9964.24	13872.6	7074.49	9000.12	10924.1	5360.26	9451.05	9041.59	8590.25	12151.8	7932.26	7265.12	7752.77	9384.99	12752	11861.1	15232.7	15232.9	3787.88	19980.5	11596.3	7117.43	11339.1	13351.3	12341.5	18041.3	9907.25	16345.2	10673.8	9747.83	9079.87	4767.65	19741.3	15828.3		15994	6809.17	10506.2	11362.4	8230.43	9220.61	14980
PC(38:04) & PE(41:04)	810.601	2.38249	0	45792.7	25628.4	28433.3	45717.6	37058.6	58068.9	28588.7	36144.1	44929.4	25844.7	44217.6	32042	33401.6	49599.2	34030.4	34926.4	31141.5	36438.1	49364	47388.6	61096.1	63183.2	20783.9	84599.7	49555.9	31310.9	47803.5	54821.7	55091.5	73359.6	41786.8	66059.9	39259.7	36994	38214.8	22304.1	83187.3	65116.3		63860	29774.8	38511.8	45440.4	36958.9	41994	60833.8
PC(38:05) & PE(41:05)	808.586	2.73781	0	19882.2	10320.2	10327.9	18260.9	13368	23070.4	9526.38	13298.9	20809.7	10526.4	17950.8	13399.2	11697	18397	12634.1	13388.8	13011.7	14181.7	19846.7	18492.4	27064.3	22520.4	5270.06	29933.4	19012.8	11993	19767.7	21252.3	21861.2	26750	14414.6	24808.2	15976.2	14132	15373.6	7227.08	30034.9	24516.1		24304.3	11514.5	14485.9	17289.7	13117.2	16073.1	23102
PC(38:06)	806.57	3.41725	0	16829.8	10195.8	11118.6	15478.8	15699.3	23244.1	10922.4	15110.9	19815.8	10022.6	15292.6	12877.8	13043.3	19959.8	13219.1	13718.4	12923.3	14913.5	20425.5	18976.3	24830.4	25571.2	7118.27	33838.5	18546.2	11665.5	20567.2	21651.2	21836.3	30349.5	16073	26212.8	16553.3	15143.8	14967.1	9072.74	32678.7	24771.6		26770.5	12020.2	16016.6	18544.9	15154.7	16806.8	24699.7
PC(38:07)	804.554	7.94384	0	5027.14	745.697	1076.67	1644.07	858.716	2501.58	1229.55	1534.64	6389.07	1328.34	1770.29	2145.74	971.001	2049.13	208.952	2312.14	1658.26	1916.5	2387.3	1984.16	5196.62	2346.06	92.8396	2888.73	3450.82	1296.25	3914.59	3566.45	1913.63	3716.35	699.55	1382.69	3100.04	1903.99	2279.58	312.836	3984.43	2701.82		2071.8	1944.3	1717.67	3179.16	1418.08	2124.29	2424.17
PC(40:05) & PE(43:05)	836.617	3.10775	0.0125	1078.26	177.939	257.167	917.608	635.045	2042.52	477.961	817.949	490.69	237.518	1582.97	412.671	478.632	263.466	231.102	354.575	248.684	610.901	424.379	1114.75	1766.37	991.854	0	2367.47	652.962	357.049	1010.77	715.144	1528.38	1665.89	430.273	1291.64	505.682	852.803	210.46	130.971	2626.08	1549.1		1453.38	236.798	648.863	700.804	594.999	1172.4	1171.29
PC(40:06) & PE(43:06)	834.601	3.8806	0	3423.35	1237.12	1050.67	3147.44	1909.51	4464.34	1403.59	2429.01	4152.53	1616.67	3636.89	1973.96	2169.47	3564.02	1994.33	1618.37	1758.59	2594.45	4516.36	4485.84	6083.6	6304.2	665.096	8298.83	3843.02	2148.55	4869.59	4033.31	4360.3	7111.61	2902.56	5784.14	3966.25	2073.08	2663.77	1026.18	7644.39	5761.61		6473.29	1963.84	2474.33	4241.61	2842.69	3633.45	5443.93
PC(42:08)_[M+H]1+	858.601	8.54002	0.0375	203.507	33.2069	279.143	359.502	1057.7	1149.98	463.392	481.442	535.132	72.5185	225.307	530.997	197.683	2792.42	383.327	350.728	155.755	51.3045	476.537	379.677	527.885	586.923	31.1517	1794.51	52.1	47.2826	221.169	637.856	272.775	554.559	484.051	487.092	65.4107	155.811	34.3915	29.4573	638.032	391.779		462.885	56.3491	186.324	199.018	110.979	212.71	484.657
PC(42:10)_[M+H]1+	854.569	8.8143	0.15	0	0	559.146	0	149.868	41.2663	930.694	731.68	135.51	1287.85	42.6385	63.6323	97.514	573.907	0	0.620429	95.7066	60.6169	59.9013	431.712	405.908	444.043	0	163.44	0	0	114.624	110.489	219.908	312.959	0	461.05	41.7142	73.4161	134.788	92.7986	224.555	843.881		306.791	565.983	134.256	45.7313	278.335	361.713	978.884
PC(44:00) & PE(47:00)	902.758	7.23298	0.375	72.6884	64.0833	0	136.262	0	55.8556	50.191	57.0956	0	0	0	65.4016	53.9908	0	92.7547	0	0	0	126.568	97.5722	50.417	72.2747	56.2574	111.146	75.9204	317.482	56.3616	215.481	117.818	106.653	0	34.3843	0	0	0	0	247.977	0		276.715	84.5602	0	197.747	0	0	167.646
PC-2O(40:00)_[M+H]1+	818.736	8.86066	0.3375	0	68.9031	39.8457	0	0	96.723	76.5789	0	0	0	106.842	0	45.3165	65.5528	0.991226	0	0	0.175627	78.3816	0	61.9429	56.9337	0	92.5402	0	87.016	0	51.1549	73.6425	0.82843	44.0998	198.77	30.7585	559.633	49.8402	725.05	178.865	111.258		267.805	53.067	62.3208	175.81	0	71.3418	370.988
PC-O(32:01) & PC-P(32:00)	718.575	3.80262	0	666.334	95.831	278.82	1547.21	335.521	2354.77	304.396	279.375	450.464	79.7668	261.167	471.229	557.605	880.619	674.602	331.197	263.268	477.095	1140.44	1087.81	1221.63	2274.31	193.229	4028.68	578.896	311.929	1326.1	1281.41	1974.43	3005.8	726.838	1441.87	495.705	280.06	530.146	247.512	3770.75	2070.33		2803.53	144.6	436.241	1297.44	379.533	1104.6	1477.9
PC-O(34:00)	748.622	2.98682	0.025	446.747	0	154.74	412.057	472.144	934.979	165.085	337.467	396.818	134.835	349.341	232.049	686.779	588.069	292.098	234.672	177.845	668.762	488.255	396.69	706.21	1350.77	82.6643	2272.74	661.959	829.825	266.133	1171.84	1129.57	1620.56	351.905	1138.63	256.761	135.695	261.453	183.338	1939.43	1308		1817.62	329.875	288.97	752.775	333.797	89.0301	1130.78
PC-O(34:01) & PC-P(34:00)	746.606	3.09902	0	8575.26	2287.38	3053.32	8999.28	5167.99	12489.2	3713.5	5608.69	4760.59	2917.75	7245.18	3300.57	3376.64	7372.96	4099.99	5050.97	1846.9	5050.94	7898.59	6664.73	8240.21	9182.41	1907.72	15258.7	7627.19	4533.14	5366.46	7372.65	10016	12316.6	5303.93	9577.39	3587.17	4965.07	3338.39	1105.45	13227.2	8551.82		11236.3	2157.4	4739.3	5567.39	4543.72	5546.55	8703.14
PC-O(34:02)_[M+H]1+ / PE-O(37:02)_[M+H]1+	744.59	1.17428	0	5519.83	1671.16	2018.24	6151.88	3167.84	8192.95	2371.93	3429.63	3325.04	1093.64	4514.15	2377.18	2863.54	4970.06	2867.55	3775.95	1598.72	3296.74	4580.57	5222.91	6162	7637.59	1020.95	11242.7	4872.55	2095.93	4448.69	5688.84	7018.51	10508.1	4068.43	8116.24	3225.7	3185.99	2691.34	1306.45	10647.3	6387.82		8345.71	2138.59	2536.87	4274.95	3217.19	3968.93	8363.93
PC-O(36:01) & PC-P(36:00)	774.638	4.83175	0.025	571.26	133.495	103.081	318.883	220.332	1371.81	146.277	387.627	168.709	124.462	653.327	180.794	304.057	87.7607	378.782	0	240.085	150.62	180.751	225.732	252.778	1150.82	95.0537	1435.64	420.208	132.301	151.254	292.566	914.789	972.809	20.667	381.218	61.5141	213.618	215.17	0	1077.06	270.845		926.182	181.562	162.303	327.817	137.76	222.714	498.241
PC-O(36:04)_[M+H]1+	768.59	2.21678	0	6139.69	1549.08	2146.9	7606.82	3703.55	9445.51	2988.86	3544.94	4833.55	1866.95	7362.02	2807.25	2857.99	4957.39	3295.93	4196.91	2144.15	3416.62	5312.71	6461.04	6356.28	8672.11	951.013	13135.5	5265.45	2775.6	4893.27	6767.42	7995.6	9741.89	5283.45	9075.28	3474.76	3610.65	3940.03	1405.45	11544.7	8290.72		10023.2	2314.58	4067.2	4885.04	3520.09	5407.39	7971.8
PC-O(37:00)	790.669	8.53802	0.1875	0	0	62.5219	83.3691	102.887	130.338	86.2618	126.404	71.0857	139.79	0	214.73	0	0	353.971	114.531	0	190.735	220.913	169.4	59.3372	129.635	65.2369	267.976	0	169.979	107.952	58.0655	0	454.658	63.4025	61.374	57.9508	158.086	0	2.9696	202.532	363.509		106.624	41.9069	164.995	164.151	205.721	81.2575	262.416
PC-O(38:04)_[M+H]1+	796.621	0.663274	0	2301.72	468.655	147.628	2518.62	843.862	4412.56	671.943	780.067	877.508	461.618	3025.65	538.176	486.419	1022.33	341.755	537.892	422.445	670.166	1935.11	1924.79	1527.72	2437.09	80.5873	5173	1433.23	340.613	1307.26	2078.18	3153.24	3112.67	1089.37	2743.85	931.72	904.742	1231.3	203.218	5228.66	2912.35		3052.1	438.779	970.073	1112.89	853.993	1844.93	2000
PC-O(41:00)	846.732	8.70062	0	96.2031	37.1032	144.787	122.947	72.4023	107.648	47.4962	90.4208	121.859	99.0295	22.092	3.03491	67.0835	61.7444	3.54743	211.009	95.0333	131.777	280.303	192.21	155.29	295.402	5.90833	258.923	104.025	65.8948	104.87	148.563	182.618	291.987	1.83132	293.752	240.492	575.645	125.354	961.24	684.054	417.761		357.002	257.643	151.325	254.131	102.557	42.4453	564.596
PC-O(46:00)	916.81	7.81696	0.4625	59.389	63.3535	0	0	86.5331	341.154	0	83.5686	68.1364	0	0	131.883	62.7306	0	66.927	125.789	51.5119	0	75.5154	0	0	47.1619	76.7959	287.594	0	0	0	83.4302	163.264	41.779	51.3211	226.516	0	0	0	79.2015	73.3793	103.692		155.839	76.3449	0	0	0	0	44.5049
PC-P(35:04) & PE-O(38:05)_[M+H]1+	752.559	4.10077	0	4418.96	1194.14	724.029	4927.71	784.355	3908.82	760.43	1278.27	1183.51	992.183	6056.02	711.837	1130.89	1929.64	1422.83	956.418	1694.54	2582.23	5498.75	3590.64	3298.08	5819.28	1777.13	6026.72	8304.17	5046.67	3621.71	4192.8	7285.1	7251.35	994.015	4148	3664.21	3995.2	3399.59	1273.65	7802.17	2745.3		5675.49	2438.16	3272.28	4983.8	1651.02	3328.36	4579.2
PC-P(41:00) & PC-O(41:01)	844.716	7.7207	0.125	75.1146	0	107.279	137.513	92.7132	0.329238	0	0	58.2965	0	152.915	37.4783	0.0936768	0.0587329	0.129891	0	86.7157	165.987	214.421	105.753	29.1875	203.101	0	137.622	207.027	0	158.952	38.3878	162.631	152.418	62.7558	46.6872	98.2979	0	43.3931	151.656	243.421	205.138		199.568	44.3328	0	80.5531	70.1477	27.2127	167.329
PC-P(41:02) & PC-O(41:03)	840.685	8.442	0.175	43.9843	0	0	57.2488	162.121	43.4188	40.8733	34.1324	0	0	0	0	0	110.172	0	0	55.9037	0	126.199	36.1241	108.456	45.8186	0	365.637	68.1329	97.8678	42.7077	418.178	2.05766	472.678	57.6356	210.997	96.0375	0	60.6375	0.624018	273.576	424.349		53.4983	58.6905	19.2804	84.6648	60.3101	150.237	143.94
PC-P(41:04) & PC-O(41:05)	836.653	8.63121	0.075	72.3738	76.4127	0	0	60.1856	82.2244	51.9452	68.4412	374.735	206.085	249.569	103.462	117.555	0	41.9279	0	324.873	454.783	651.772	292.978	3856.93	152.833	0	512.87	855.996	236.462	660.066	915.972	471.743	1577.29	66.312	0	696.743	353.573	379.036	65.4006	1072.16	229.651		126.697	372.674	444.16	345.184	118.861	42.9688	584.943
PC-P(42:09) & PC-O(42:10)	840.591	8.32272	0.1375	26.5431	46.1016	109.591	56.978	147.369	157.178	0	119.394	0.373412	0	52.4495	0	0	203.19	129.033	72.4807	41.6049	169.539	142.259	207.353	187.837	60.5111	0	353.502	189.721	52.9894	0.099143	167.736	211.696	374.976	24.4041	134.819	199.725	0	0	0	263.564	0		247.758	0	56.1075	0.231302	30.5559	238.652	100.854
PE(34:00) & PC(31:00)	720.554	8.63259	0.0875	128.355	0	142.624	0	0	108.09	0	74.7808	76.0281	56.193	0	76.4751	69.4379	184.413	189.706	69.3345	141.171	70.94	241.085	426.041	352.783	302.115	143.719	395.144	282.284	69.7974	65.2845	139.961	0	203.006	82.5513	198.96	71.0234	89.5479	116.041	74.7548	292.366	145.755		542.321	51.4152	255.64	317.722	146.625	72.0861	212.806
PE(34:01) & PC(31:01)	718.539	4.06344	0	1642.66	1248.27	3138.59	1310.84	4389.09	4997.25	1495.73	2369.94	2532.72	1606.42	3327.11	2137.91	2706.09	3822.96	4204.51	1253.52	4278.88	5028.98	7353.37	4635.89	6808.67	8216.79	2735.95	10257.4	6527.64	3270.47	5896.67	6429.07	6576.96	8796.86	4407.81	7044.51	6208.23	4621.39	4758.17	1760.73	8850.4	7708.41		7990.02	4593.13	3859.1	7274.75	1912.81	4016.89	7505.57
PE(34:02)	716.523	3.13156	0	386.78	244.915	381.118	300.702	174.261	283.553	249.476	168.876	343.943	178.253	241.831	343.325	242.38	759.289	567.396	364.491	511.197	374.852	1099.81	848.473	1250.74	1181.88	325.958	2142.99	1681.21	561.151	1519.69	1081.99	1644.17	2570.56	587.728	2539.15	937.39	734.213	853.102	151.189	1627.85	1529.84		1602.07	524.416	666.862	1355.1	373.306	1252.46	1586.08
PE(36:01) & PC(33:01)	746.57	2.30627	0	1382.44	290.705	365.579	1350.65	601.202	2019.43	637.384	835.608	1142.36	438.258	1639.37	782.726	818.764	1581.15	314.734	625.926	529.034	1522.16	2414.44	1573.63	2308.35	2450.14	160.649	4902.8	2768.49	1641.38	1647.52	1785.67	3075.82	4259.83	622.009	2490.55	1684.39	946.181	871.193	663.369	5138.48	2769.67		3004.51	297.163	1333.32	1891.53	753.833	1120.18	2984.91
PE(36:02) & PC(33:02)	744.554	2.28841	0	2944.18	1261.09	3202.46	3822.97	3307.44	5509.57	1878.8	2538.3	4341.9	2295.67	4070.37	3334	3753.41	5072.68	3031.96	2168.86	2247.49	2890.95	5757.98	4418.3	6153.63	6873.69	1961.86	6936.48	4891.03	2098.44	4061.07	5565.85	5445.47	7798.02	2418.96	5591.17	4229.17	3150.24	3795.27	1218.33	7071.79	5868.5		5381	3072.91	3018.24	3566.09	2458.25	2975.13	6232.99
PE(36:04)	740.523	3.12301	0	1436.51	870.33	839.661	562.655	637.257	1690.32	158.048	1035.34	1225.84	486.596	1440.5	1449.09	980.085	1415.91	1606.38	247.785	1770.04	1913.42	3325.18	2099.75	3685.48	2872.61	862.645	3907.32	3372.91	1342.05	3354.21	2912.81	3411.45	3945.86	1170.89	2997.12	2810.59	2054.32	2036.58	361.76	4601.44	2570.98		4328.6	1762.72	2277.07	2956	1309.62	1932.02	3040.34
PE(36:05)	738.507	6.28971	0.3375	75.5694	0	70.2014	100.718	77.3545	182.881	0	140.877	69.1141	46.0893	0	0	116.226	0	74.1046	72.0962	0	0	265.809	0	109.572	0	0.19108	0	88.973	0	74.2066	249.275	65.8652	65.5582	0	116.123	210.301	0	0	0	64.5558	0		0	72.1182	0	308.561	69.5829	82.4886	168.917
PE(38:01) & PC(35:01)	774.601	2.92955	0	393.79	589.113	239.713	720.754	385.007	1805.33	92.9759	840.348	1053.35	137.661	714.306	354.291	695.802	733.836	741.203	797.917	317.314	978.001	1479.48	980.24	2240.35	2130.65	421.174	3710.27	1710.92	670.637	1227.29	921.561	1303.1	2543.42	953.504	1697.97	592.115	664.801	430.724	256.387	3752.42	2156.92		2053.74	620.682	812.265	783.786	265.52	842.856	1985.66
PE(38:02) & PC(35:02)	772.586	3.18182	0	3785.12	1010.24	2851.63	3594.7	3663.16	5059.81	1006.91	2473.12	5007.87	1892.28	2698.33	3193.41	2774.39	4731.08	3163.96	2010.71	2800.73	2314.75	5092.72	3643.93	5503.16	5534.49	942.304	8774.49	4463.7	1729.42	3718.54	5840.41	4535.98	7848.93	3050.28	5362.19	3253.67	2154.82	3053.8	843.505	7840.76	6021.64		6622.3	2660.31	3481.92	4622.8	2905.36	3698.88	5359.73
PE(38:06)	764.523	3.39897	0.1375	96.067	0	0	224.228	76.2679	199.353	0	113.249	132.721	74.5669	91.478	0	0	427.746	154.797	77.9052	159.167	245.88	661.207	139.977	290.323	308.234	0	188.718	335.055	86.4393	347.377	485.524	500.574	642.385	144.801	534.116	271.184	452.616	0	82.156	632.485	185.511		257.227	473.376	92.969	0	196.757	69.8663	419.481
PE(40:04) & PC(37:04)	796.586	4.32383	0.075	252.849	71.6412	194.58	229.006	345.749	193.936	0	136.405	163.022	215.139	366.409	290.203	166.584	151.454	0	65.2603	0	63.5444	641.774	268.958	395.8	749.952	0	961.432	527.041	60.4322	518.619	194.922	798.704	1083.18	409.216	423.486	338.629	333.895	449.11	0	779.645	515.183		829.276	319.761	380.48	424.367	258.602	401.549	572.639
PE(42:06) & PC(39:06)	820.586	7.63949	0.3	0	341.387	149.014	58.6973	218.31	1023.45	50.8126	343.226	135.379	75.7862	138.605	723.64	90.4657	559.621	203.965	73.0861	0	0	172.277	92.0439	74.156	153.053	0	65.9218	0	0	0	0	0	152.357	72.8047	0	90.382	325.985	0	66.9456	125.455	239.352		81.9303	0	144.174	0	332.877	77.8496	170.849
PE-O(42:00)_[M+H]1+ / PC-O(39:00)_[M+H]1+	818.7	8.85473	0.05	0	0	226.052	76.545	155.616	67.6311	106.797	146.159	0	146.328	249.232	75.3875	55.0834	178.531	385.301	72.9235	76.5836	353.139	526.597	408.442	651.869	750.623	70.9759	1226.87	530.068	121.374	381.511	892.189	752.121	1262.71	173.458	701.452	361.37	303.635	288.632	188.535	1206.33	1003.73		651.701	270.133	541.645	557.668	99.4957	210.536	747.886
PE-P(38:06)_[M+H]1+	748.528	7.11338	0.375	47.0018	0	92.6171	70.0189	76.4279	92.6082	75.2032	64.2264	0	0	84.559	53.1459	0	0	157.192	133.042	0	0	0	63.0473	0	120.429	0	73.5835	58.7215	0	65.6351	114.125	11.9079	270.438	0	45.9452	70.2894	63.4114	0	0	246.436	76.222		152.567	91.8406	106.435	63.84	832.608	65.4808	0
PE-P(42:06)_[M+H]1+	804.59	7.75305	0.4	197.72	0	296.632	0.582726	0	53.8331	60.9466	68.6024	0	0	153.865	55.4574	0	149.3	140.095	0	0	0	0	0	70.9119	80.2224	0	0	0	0	80.8951	0	0	132.367	0	64.2181	82.9833	0	0	0	130.288	58.7462		57.8279	0	63.4999	58.406	107.174	178.172	69.4111
PG(36:00)_[M+H]1+	779.58	5.58331	0.3625	0	0	162.371	0	0	256.997	63.7713	149.704	0	0	0	72.2392	78.4901	0	0	0	76.7823	166.256	118.343	68.4406	80.1017	71.658	0	84.7291	98.6098	57.7234	66.1856	133.773	219.008	89.7753	84.787	0	65.4554	87.8138	91.8828	0	154.263	97.3371		46.1643	148.483	0	233.169	0	0	139.762
PG(36:01)_[M+H]1+	777.564	7.63067	0.0875	91.032	23.3737	67.3291	0	56.5266	0.781991	18.9364	25.3373	0	59.241	100.798	0	73.4095	121.144	80.4948	80.0382	86.468	22.3972	95.5351	72.1144	200.866	237.525	0	182.857	156.581	116.031	240.293	192.311	233.265	459.054	194.184	105.205	109.94	168.398	70.2931	95.0718	265.236	89.0915		214.321	73.909	112.173	20.2747	41.6393	104.144	311.935
PG(39:07)_[M+H]1+	807.517	8.49405	0.175	0	0	0	0	0	0	220.521	0	0	0	0	0	0	0	0	166.181	225.428	26.96	236.149	169.877	511.421	431.416	145.672	525.871	166.742	77.0127	304.441	479.671	120.409	476.935	7.08158	372.541	150.062	76.7156	50.3906	5.06773	520.646	673.637		202.99	148.908	27.1798	125.882	59.6794	194.65	247.914
PG-O(39:00)_[M+H]1+ / TG(47:04)_[M+Na]1+	807.647	8.51609	0.3875	0	0	0	0	0	77.2677	0	316.058	45.0794	46.116	114.324	76.6559	0	60.4169	71.8245	0	66.7521	48.8062	54.8659	135.869	238.967	65.1496	85.4526	0	165.192	0	229.289	0	116.541	62.4692	0	51.6667	82.7515	144.766	134.297	0	257.394	0		103.25	108.44	137.451	0	0	0	0
PG-O(40:01)_[M+Na]1+	841.629	7.48812	0.4375	0	0	0	0	99.7574	0	0	0	0	154.484	0	0	58.4776	70.0344	0	0	57.0833	220.76	0	0	59.6498	67.9364	0	274.885	0	0	0	88.5201	0	67.148	0	0	64.7062	0	0	0	148.037	311.357		123.955	59.6345	75.9775	62.0633	0	72.225	76.5575
PG-O(40:01)_[M+NH4]1+	836.674	7.35717	0.075	161.135	197.467	0	0	90.9549	169.423	105.566	122.212	811.344	275.957	529.88	130.032	221.985	0	253.937	0	582.475	747.201	1068.27	714.554	3856.93	436.33	0	675.091	1651.87	491.93	1227.17	1168.17	1306.76	1577.29	128.039	0	1418.25	742.892	929.107	133.9	1285.89	241.318		297.686	670.813	719.946	715.014	433.575	96.4005	698.836
PI(33:00)_[M+NH4]1+	842.575	7.71616	0.175	201.778	62.7466	88.4126	183.762	301.858	473.458	211.732	383.76	102.832	121.145	198.047	611.75	63.3337	620.247	242.709	326.059	0	78.8843	120.749	57.5243	152.789	57.5721	0	422.409	127.827	0	126.377	298.144	225.87	230.502	217.416	77.0461	76.4812	0	0	0	557.616	241.792		240.208	0	0	77.0234	94.5207	49.6302	318.504
PI(33:05)_[M+NH4]1+	832.497	7.54883	0.2125	79.5656	84.281	0	0	0	0	0	0	78.8843	0	86.8584	77.7591	0	0	0	0	786.917	663.592	1062.51	169.125	631.708	72.0558	0	409.756	998.593	461.356	1327.68	621.948	449.378	236.65	0	261.597	1503.21	399.342	786.111	0	505.665	234.468		0	567.305	280.168	781.54	291.885	0	303.68
PI(34:00)_[M+H]1+	839.564	7.25651	0.225	121.916	0	89.3568	66.2861	33.2792	300.299	0	0	207.851	66.9327	122.878	207.497	243.01	382.704	0	59.1008	106.735	158.735	163.499	163.981	0	58.5133	132.378	91.567	70.735	69.9699	80.404	71.6262	75.2662	275.478	101.223	102.98	75.5152	0	138.261	0	197.509	84.9582		200.824	0	0	80.7471	124.96	2.05081	0
PI(37:03)_[M+NH4]1+	892.591	7.33543	0.2625	0	0	0	0	0	0	0	0	96.906	0	0	0	0	0	0	0	192.66	81.4355	156.504	0	933.819	607.365	0	764.223	125.711	90.6832	0	153.229	90.5543	770.299	74.3491	308.431	150.775	217.891	0	140.364	1524.46	1098.84		808.673	93.8407	77.2931	188.57	95.3482	0	509.723
PI-O(33:01)_[M+NH4]1+	826.58	8.66565	0.125	101.284	62.1486	194.681	63.4279	252.963	122.593	46.7991	53.5932	152.567	0	235.375	189.791	232.778	391.222	219.437	287.278	0	72.8249	148.011	125.225	439.023	426.266	0	623.096	0	0	205.153	93.2838	45.9575	610.411	35.8716	581.322	161.816	182.063	0	96.2754	683.578	404.466		500.201	67.3327	58.2588	31.3182	216.322	155.31	168.299
PI-O(33:02)_[M+H]1+	807.538	3.97969	0	100.872	55.0318	54.9482	198.393	76.5612	400.097	122.449	75.3561	114.875	74.7712	38.1598	131.043	49.955	289.673	166.553	55.112	375.295	996.551	1956.41	3229.6	5122.78	5704.6	655.409	6830.5	1814.17	846.534	3414.81	4369.28	2838.91	5612.16	3211.66	4450.05	1476.23	1315.5	1230.62	915.114	6807.39	5796.34		4571.45	427.132	1378.24	1526.38	1330.55	2865.32	4104.4
PI-O(35:02)_[M+H]1+	835.569	4.96752	0.15	77.3418	0	0	0	0	0.0298944	0	0	0	0	43.5781	41.1491	0	0.55831	78.0656	0	146.569	365.845	397.567	402.101	896.548	1524.03	44.7331	1872.53	438.791	323.624	333.369	605.132	303.01	1105.2	405.188	890.247	210.758	215.613	475.637	0	1692.62	1711.84		1261.9	0	225.632	408.176	198.296	316.984	1207.37
PI-P(35:02)_[M+H]1+	833.554	7.29999	0.3625	0	0	0	0	50.2586	333.051	0	71.0151	84.2571	0	69.22	24.3215	0.956301	104.591	0.504035	98.5045	0	0	43.6954	80.7963	121.957	278.091	0	156.425	0	46.2784	46.9838	0.133238	167.75	215.044	0	82.3707	71.7398	78.4513	0	0	140.487	0.921166		118.193	89.9117	69.9373	0	78.1761	0	198.445
PS(31:00)_[M+H]1+ / PG(31:02)_[M+NH4]1+	722.497	6.0502	0	21999.4	1322.48	6312.49	4079.47	6320.22	14269.2	11163.5	14106.6	13719.1	8272.28	2335.84	5841.07	3479.41	15715.8	51435.9	9517.97	6512.3	4776.94	11171.3	17397.7	11634	13517	65027	26688.6	6130.13	2138.9	6860.42	6355.13	16369.9	27835.1	8682.64	29819.7	6053.2	11361.8	17932	27687.6	31820.6	29330.7		238703	9283.68	7230.3	18441.3	26692.7	7787.8	19865.2
PS(36:01)_[M+H]1+ / PG(36:03)_[M+NH4]1+	790.559	2.55515	0	21204.6	16484.2	24492.4	28844.4	35362.7	47678.3	25333.1	33113.5	26795.9	18043.1	26234.5	32528	25977.9	46371.3	29311.3	27133.5	11253.1	12451.8	20040.7	19590.5	24873.2	27152.2	6228.91	32619.2	15833	9869.06	19760.9	22024.4	20713.3	28497.7	16016.9	23783.2	15311.2	11769.3	13122.6	8640.55	32606.2	25110.5		25810.5	10666.2	14971.2	15210.9	13902.9	15610.9	27984.1
PS(36:02)_[M+H]1+ / PG(36:04)_[M+NH4]1+	788.544	2.50582	0	7480.68	6659.98	8825.55	10951.5	15521	19047.5	9321.22	12868.9	13119.7	5918.89	9041.48	12721.2	11389.1	18904.5	12320.2	10348.2	8418.66	9354.4	15011.8	15775.4	19622.8	17814	4214.89	26441.6	11665.4	6156.16	13918.1	18955.9	15626.1	23035.7	13269.8	19088.9	8827.17	9000.53	9843.01	6383.1	21889.2	17237		18088.9	6860.02	9435.48	10327.8	9495.93	12096	16952.7
PS(38:01)_[M+H]1+ / PG(38:03)_[M+NH4]1+	818.591	0.804737	0	5909.51	5193.95	7689.75	10214.9	12401.5	17202.7	8875.46	10822.4	9033.86	5680.2	7724.57	10801.4	8724.5	16368.4	11346	8981.85	2689.7	3048.16	6774.3	7096.56	9997.91	9705.25	761.877	11962.2	4118.67	1959.87	7952.31	7421.22	6267.96	10635	5520.79	7964.96	3849.86	2638.78	3777.89	1279.87	9884.75	10679.7		8408.35	2441.68	3264.94	4653.62	3412	4812.91	9107.93
PS(38:02)_[M+H]1+ / PG(38:04)_[M+NH4]1+	816.575	2.38215	0	4886.93	4343.05	5647.62	7738.52	10091.6	12885.8	5960.61	9360.9	8730.17	3842.99	6034.61	8556.53	6327.5	13435	8058.94	7606.46	3574.04	5709.32	8318.13	8549.14	10292.4	11038.2	1708.69	14594	5249.01	2384.49	8031.02	9836.88	7936.01	11516.3	6530.41	10786.5	5085.26	3317.53	4230.51	1896.06	12135	10372.9		10793.6	2368.34	4070.08	4471.16	5233.95	6260.97	9593.06
PS(38:03)_[M+H]1+ / PG(38:05)_[M+NH4]1+ / PS(36:00)_[M+Na]1+	814.559	2.03107	0	2496.99	1309.29	3783.74	4356.8	6367.14	8256.74	4002.85	5168.89	4194.58	1532.78	3302.74	4590.11	4090.47	7413.71	5246.93	3578.68	1495.49	2325.99	4086.47	4377.38	5886.89	5845.55	479.743	8003.69	3717.71	1304.39	3612.55	5710.43	5017.67	6975.16	3464.43	6049.78	2798.5	2533.44	1878.38	973.718	7800.39	5253.59		5603.65	1037.44	1741.81	3706.8	3217.06	2834.68	5788.2
PS(38:04)_[M+H]1+ / PG(38:06)_[M+NH4]1+ / PS(36:01)_[M+Na]1+	812.544	2.73753	0	3962.51	1497.21	2777.05	4349.3	3269.2	6308.36	1586.54	2642.34	5125.92	1746.61	5015.11	3208.93	2545.65	4003.81	4244.25	2037.22	4796.78	5774.58	9253.79	5938.52	9421.52	8507.5	2103.48	11462	8324.75	5884.85	7219.66	8724.52	8587.91	11800.2	4766.36	9645.94	6334.55	6468.89	6378.75	2284.63	11982.3	2932.51		8554.85	4802.76	5309.67	8319.56	5430.99	4771.28	8415.55
PS(39:05)_[M+Na]1+	846.526	7.07303	0.1625	80.6952	132.958	0.574696	0.398455	95.9533	81.1232	132.977	103.475	56.3054	2.73078	0	156.557	1.67633	132.082	0.138057	0.19541	0	55.3877	141.588	269.094	283.258	778.19	0.138169	682.172	0	0	201.141	49.3289	158.652	279.536	200.427	387.468	313.261	0	120.705	0	659.846	349.892		137.812	85.3832	116.796	0	83.1315	64.5192	169.411
PS(40:04)_[M+H]1+ / PG(40:06)_[M+NH4]1+ / PS(38:01)_[M+Na]1+	840.575	3.23588	0.0625	205.846	68.1553	192.75	90.1309	496.305	414.656	82.2003	218.9	233.771	270.234	75.2128	107.852	0	783.512	281.006	167.139	70.583	264.387	636.424	491.161	585.344	225.702	0	774.223	369.829	150.769	156.674	624.114	544.417	955.816	99.3944	256.789	264.892	78.1754	89.3548	53.2115	621.593	0		399.423	0	90.7175	159.671	211.366	703.1	227.585
PS(42:06)_[M+H]1+ / PG(42:08)_[M+NH4]1+	864.575	8.88239	0.0625	0	0	60.3421	53.6848	0	258.086	149.164	103.727	302.123	118.228	48.1502	117.636	274.052	127.571	104.426	0	0	0.46921	88.0486	17.7507	239.481	72.322	41.0967	684.12	31.1634	0.453065	134.788	231.365	3.01284	359.364	340.979	349.404	56.5115	38.5177	11.4995	1.63437	327.142	320.852		448.185	0.00950413	57.369	341.895	64.6819	89.6764	405.361
PS-O(34:00)_[M+Na]1+	772.546	0.562008	0	15676.4	12933.2	19061.8	22939	28672.3	36979.7	18719.8	24710.6	25186.6	14199	20113.8	28433.3	22609.7	37344.5	23915.4	19562	13851.2	16127	26915.9	26097.3	36307.7	38020.8	8005.81	46976.2	18826.4	9698.42	24896.1	31298.4	26679.5	39664.4	24525.9	34732.9	19276.7	16261.7	16997.1	12430.3	45561.8	39936.7		38143.1	12379.9	17843.8	19595.3	18634.8	21324.1	38345.3
PS-O(36:01)_[M+Na]1+ / PS-O(38:04)_[M+H]1+ / PG-O(38:06)_[M+NH4]1+	798.562	0.676216	0	1866.73	1680.41	1902.59	3947.91	5290.5	7572.77	2670.66	4407.26	4470.48	1839.31	3123.77	5097.62	3596.79	7245.29	3912.78	3749.34	2186.5	2384.87	5063.94	4847.64	6891.75	7299.81	1140.94	9967.6	2974.67	1365.67	5551.31	6376.96	4735.21	8944.23	4401.37	7324.43	3002.45	2113.16	2751.43	1270.22	9635.37	8014.84		7961.86	1309.16	3239.22	3103.98	2694.22	3523.55	7153.69
PS-O(36:02)_[M+H]1+ / PG-O(36:04)_[M+NH4]1+	774.564	1.56217	0	7660.66	6027.03	8962.77	10114.6	13918.3	18897	9790.38	12350.2	11846.7	5575.4	8618.71	12244.7	9892.19	17060.4	12669.3	10597.4	7858.15	8616.5	13747.4	13911.2	18242.9	19765	3809.4	24341.7	10124.9	4971.02	13609.5	15614.4	13318.2	21552.8	12081.2	18886	9627.82	7827.98	9694.46	5461.51	23753	20755.4		20757.3	6282.66	9795.17	10626.4	9255.81	10548.2	19139.7
PS-O(36:03)_[M+Na]1+ / PS-O(38:06)_[M+H]1+	794.531	3.04996	0.1375	327.802	63.8279	312.89	153.479	386.778	279.548	90.2688	172.674	468.308	175.095	0	0	195.229	440.085	78.4752	0	76.8531	203.321	146.807	250.536	726.115	89.9086	0	252.648	158.212	74.831	0	93.7771	73.4508	208.114	163.451	98.3319	178	155.464	153.877	0	466.361	331.379		234.01	83.9836	271.289	273.739	0	62.1358	144.132
PS-O(38:02)_[M+H]1+ / PG-O(38:04)_[M+NH4]1+	802.596	0.672115	0	1329.71	835.864	1062.94	2081.02	3276.52	4575.77	1581.96	1535.63	2930.24	685.852	1583.77	2182.34	1879.01	4317.28	3520.25	1334.34	1389.65	2081.42	3186.92	2459.13	5031.39	4843.16	741.915	7872.9	1782.87	824.777	3605.14	3793.61	3031.58	5507.34	2809.96	3729.93	1381.02	679.555	1569.11	526.757	6860.95	5670.63		5254.24	799.647	2242.4	1846.35	1544.9	2082.28	2960.76
PS-O(38:03)_[M+H]1+ / PG-O(38:05)_[M+NH4]1+ / PS-O(36:00)_[M+Na]1+	800.58	1.32092	0	6779.06	5253.44	7903.66	9543.14	13325.5	17275.5	7111.19	10153	11262.2	6154.47	9274.81	11653.8	9865.9	18371.4	10868.9	8867.67	6026.08	6780.7	10287.9	12824.6	17638.6	17461	2772.37	23209	8375.25	3816.66	12539.3	15586.6	11265.2	19441.7	10781.7	16525.7	9044.61	7166.44	8311.76	5104.67	20470.2	19258.5		19199.3	5595.43	8336.71	8394.46	9119.09	10351.3	17686.7
PS-O(38:03)_[M+Na]1+ / PS-O(40:06)_[M+H]1+	822.562	2.27744	0.2375	95.5637	62.4768	140.248	88.9299	0	219.394	76.9588	84.672	82.4097	70.448	184.38	248.178	242.347	131.849	0	0	93.6885	0	69.9869	163.386	261.394	301.189	0	296.807	0	0	87.637	92.0907	285.912	373.177	284.537	273.901	89.6906	0	0	81.4301	369.453	193.627		328.276	160.254	0	80.0317	84.2282	152.205	319.749
PS-O(40:04)_[M+H]1+ / PG-O(40:06)_[M+NH4]1+ / PS-O(38:01)_[M+Na]1+	826.596	2.36931	0.1	152.194	104.464	254.818	82.966	327.843	142.895	217.536	72.3507	184.127	60.1867	258.628	255.127	373.992	612.597	311.32	339.773	0	78.8401	180.865	194.969	611.741	571.51	0	1005.13	0	0	275.833	113.255	81.951	905.857	75.7579	914.557	263.99	238.272	0	137.938	996.623	633.337		788.042	125.24	63.6388	86.7233	344.549	254.52	361.785
SM(34:01)_[M+H]1+	703.575	2.51748	0	81683	62532	94178.6	117034	144902	190456	97937.3	141367	102141	62958.4	111321	121252	117193	189721	150165	109554	116975	134451	207939	197730	231029	255498	88274.1	396755	175257	102736	182067	220184	208957	304764	155117	264983	154492	139663	145030	90773.7	314193	260190		279331	112748	149553	179791	146432	164979	259567
SM(34:02)_[M+H]1+	701.559	4.39347	0	6940.53	6116.59	9322.47	10069.5	13969.8	19667.3	9788.58	12993.1	10111.4	6206.33	10237.4	11975.8	11479.6	18131.8	13431.1	10383	11038.2	12350.1	19419.5	18653.3	21561.3	24413.6	7991.4	35261	15309.5	8733.86	18602.9	21095.4	19170.9	27694.5	15239	25465.3	14729.2	12873.5	12709.4	8389.73	30719.9	25744.8		25750.8	10721.7	13810.5	17361.8	14609.3	14353.2	25128.9
SM(36:01)_[M+H]1+	731.606	2.2686	0	7504.05	6867.09	9746.6	11498.9	16453.2	19897.8	9247.34	13821.6	12136.1	6074.85	11455.4	13218.7	12527.4	20642.3	15664.5	9953.11	13305.8	14002.4	23631.4	21995.1	25734.7	29072.5	9557.56	40152.1	19013.3	11396.6	21904	25086.9	21997	33862.7	17140.6	29098.6	18221.1	14700.3	16816.7	9825.84	34236.5	28073		30457.4	11606	16523.3	22126.6	16231.5	18656	28216.9
SM(36:02)_[M+H]1+	729.591	2.86751	0	1278.08	999.153	3767.29	3390.84	5345.28	6257.43	2394.48	4703.4	2623.71	1496.99	2782.24	3822.8	3681.59	8186.34	5143.8	2965.25	4302.58	4405.12	7418.57	7610.41	9495.53	10380.5	1941.98	14466.1	6417.11	3186.14	7966.83	8362.99	7617.75	12458	6693.04	10380.5	5555.87	4774.1	5203.35	2819.65	12014.9	9992.7		10411.1	3594.9	5498.76	6591.28	5673.07	6129.02	10824.5
SM(36:04)	725.559	5.45441	0	6000.49	2698.86	4914.63	6255.38	2554.22	4613.32	1186.25	1913.77	8209.93	5184.35	5903.95	6055.71	3573.59	4351.02	3451.56	1477.8	7704.16	7595.23	11549.7	6575.32	17666	8053.06	365.911	8255.91	12489.3	6603.75	12565.7	10121.8	8672.62	11653.5	3078.28	6135.7	10928.8	8317.57	8770.7	2242.44	11089.4	7899.59		8711.63	9292.86	7305.5	10061.8	4825.75	5041.78	9000.12
SM(38:01)_[M+H]1+	759.638	2.66081	0	3137.49	1374.37	2421.11	4838.23	5582.98	8102.43	2759.58	4362.65	3915.35	1224.24	4910.32	3300.26	3966.14	8286.4	4907.49	3428.62	3203.44	4513.01	8074.42	7673.94	8882.13	11236.6	2157.7	15828.2	6168.68	3724.37	7207.14	9010.5	9031.22	13634.6	6163.37	9067.05	6879.36	5764.68	6045.17	2414.27	13690.7	10722.5		10772	3751.8	6309.82	7279.02	5141.44	5671.54	11470.1
SM(40:01)_[M+H]1+	787.669	1.89758	0	23429.3	16760	24332.5	32688.7	34091.2	44996.6	20627	32085.8	26450.6	16527.8	34906.4	28625.7	27932.2	44901.4	32153.3	23723.8	29496.2	33977.1	51315.6	45663.6	54331.3	61390.8	20647.5	83678.9	46230.7	26556.8	44930.9	50979.6	51361	70957.1	35678.3	59833.5	38291.8	35694.5	35877.9	20680.4	77083.8	58843.8		60664.5	29410.3	37656.2	45177.2	35262.1	39688.4	59813.6
SM(40:02)_[M+H]1+	785.653	1.5874	0	9363.93	6331.86	11680.4	13526	15130.6	20164.9	9938.31	14636.3	12398.7	7300.13	12612.5	12449.6	12722.5	21308.7	14705.6	10181.5	14426.4	14871.6	22787.2	21402.5	26907.8	28567.7	9138.83	37885.2	18770	11867.6	21171.1	24638.2	23938.4	33467.7	17549.8	28451.5	16831.3	15108.4	15526.4	10324.9	34159.6	28414.2		27291.1	13089.9	17094.5	20015.1	17080	18215.7	28786.4
SM(42:01)_[M+H]1+	815.7	0.493645	0	36976.4	30188.5	48240.2	48070.5	65329.3	69773.3	35473.9	57549.8	53267.4	30902.9	53167.8	50852.6	55365.9	80216.1	59382	38442.2	53671.8	63053.5	91830.5	82104.3	95048.4	103161	37861.9	139258	82159.7	48886.2	80195	95890.9	87987.7	130208	59257.9	104455	73110.3	59835.8	64329.5	41215.2	126483	100571		104298	54778.6	67340.2	83347.2	61466	68418.4	102769
SM(42:02)_[M+H]1+	813.684	0.844114	0	48061.5	40272	65203.5	64237.7	87508.5	98958.1	49266.1	77104.3	68519.9	38322.5	68692	66143.1	74530.8	107603	76529.2	52948.3	72989.2	82220.5	123149	111274	131082	149388	51764.6	192996	108317	65582.3	109969	128814	121015	173065	82976.8	144693	95241.2	81604.2	87350.3	55726.3	174869	140106		146286	71890.6	90062.5	111836	85279.2	94535.3	143058
SM(42:03)_[M+H]1+	811.669	0.920942	0	15622.7	13251.2	20794.4	22407.5	30072.7	32121.1	15607.7	25927.5	23977.9	12348.5	22613.6	20927.1	24408.6	36703.7	25178.8	18443.8	25825.1	28607.6	42102.8	37798.1	45103.2	50292.5	17430.2	64679.3	36634.7	21389.9	37228.3	42500.7	40230.1	58485	29664.2	50532	32660.2	28477.1	29534.5	18098.8	60765.8	48999.1		50666.7	24992.2	31235.2	37589.8	30217.6	33845.3	50924.1
SM(42:04)	809.653	2.144	0	1124.93	252.967	786.674	1582.95	678.428	786.031	151.725	732.201	1332.59	635.871	1461.7	1294.63	775.825	1285.26	1025.69	649.726	1807.62	2651.49	3566.8	2076.21	5924.06	4185.28	403.471	5560.16	3515.15	1598.27	3305.33	3146.92	3849.79	5584.02	1815.94	4044.43	3290.6	1600.82	2012.68	604.833	4667.66	4078.88		4200.03	2185.39	2240.27	3463.85	1783.72	2443.71	4414.67
SM(42:05)	807.638	5.42696	0.35	0	0	0	0	0	91.2771	0	254.694	80.5859	67.1779	143.171	86.0911	0	102.713	83.1517	0	77.8461	64.1689	99.0654	146.975	281.739	149.754	99.7546	0	261.926	0	366.168	0	149.286	96.8964	0	129.199	82.7515	158.842	151.102	0	260.929	0		118.233	136.32	152.643	0	0	0	0
SM(44:01)_[M+H]1+	843.731	1.54242	0	421.812	211.509	406.792	235.511	403.663	682.535	216.574	462.649	945.095	160.512	622.872	344.406	851.109	1063.59	536.254	89.3977	245.615	788.97	1460.46	886.077	1600.97	2567.13	113.251	3753.96	1340.43	343.251	1003.27	1712.88	702.708	2308.53	519.806	2147.7	848.071	376.315	690.857	84.8031	3658.04	1564.37		1577.07	665.804	1114.18	1386.84	479.65	951.078	2259.38
SM(44:06)	833.653	5.27455	0.1125	76.9136	0	276.233	99.3123	87.6991	273.689	0	238.481	651.27	62.7589	203.27	162.576	253.05	151.893	98.8506	0	313.069	401.896	400.253	156.262	1076.27	402.751	0	0	414.337	193.355	617.337	417.228	109.723	565.776	114.841	96.2421	509.577	376.426	373.196	77.5767	416.204	435.534		205.426	0	0	770.308	161.09	95.3419	161.877
SM(46:00)	873.778	7.09997	0	3944.88	2007.22	2134.71	2070.41	3170.89	5398.5	1983.1	4614.1	4069.57	1987.78	2400.7	1531.04	1974.88	4673.34	2719.37	4555.94	2795.02	2744.77	4302.63	3691.26	4799.48	6596.95	1509.64	9198.08	3594.76	1784.86	4336.05	4441.3	5102.42	8639.03	4218.98	8770.16	3125.77	3653.25	4023.85	3371.8	6975.31	7149.57		6833.73	2772.39	2840.29	3689.65	3384.02	3914.73	7276.17
Stigmasterol_[M+H-H2O]1+	395.367	3.01759	0	209.899	63.6618	397.835	350.374	428.51	160.665	127.116	165.578	364.765	277.575	304.289	193.716	131.241	796.441	394.855	104.5	2331.31	2279.07	2996.44	2376.84	2759.46	3947.32	418.282	3524.16	3027.53	1195.78	4033.67	3680.5	2061.18	4390.82	955.611	3054.56	2909.51	2935.58	2520.04	1625.37	4216.84	3155.05		2376.35	3461	1891.87	3273.89	1840.61	2090.67	2983.53
TG(36:00)_[M+NH4]1+	656.582	3.84724	0	318.436	87.0382	154.859	225.054	303.842	1626.24	390.188	1368.47	66.3189	513.113	812.069	257.079	3083.33	242.711	460.577	380.682	44.4189	386.003	3678.73	295.786	1913.72	425.645	151.327	2865.47	2102.05	140.131	982.372	2175.38	1673.4	6511.21	223.748	4381.91	4271.31	40613.5	5350.29	52664.3	6854.65	11117.7		3096.43	13718.3	4623.19	10475.2	8453.84	2132.86	21901.5
TG(36:01)	654.567	8.4335	0.1	69.72	0	0	0	132.401	169.756	100.801	68.7508	106.118	158.851	189.576	0	235.264	0	119.693	94.0997	218.626	55.2978	283.137	303.229	439.034	201.341	0	373.179	383.371	224.577	137.562	371.955	215.564	986.464	0	503.184	428.39	9673.97	383.152	12958.1	848.234	852.277		190.455	2299.22	159.776	1180.76	969.839	114.315	4250.25
TG(37:00)_[M+NH4]1+	670.598	7.35954	0.475	0	0	93.7578	216.163	0	186.452	0	0	0	0	197.847	0	131.284	0	0	0	0	0	0	0	0	0	0	102.772	0	0	0	71.6056	70.9372	0	0	0	0	4032.76	0	6289.62	69.6628	137.103		0	484.389	92.2938	260.212	75.9187	0	592.55
TG(38:00)_[M+NH4]1+	684.614	4.17916	0.075	725.506	80.4197	91.8713	173.333	301.909	1991.82	419.293	2006.58	84.16	260.604	258.211	179.561	3971.01	135.77	249.308	169.165	133.851	88.8408	3890.92	200.97	669.747	320.193	239.019	2682.04	1626.84	0	1352.47	2458.51	1861.21	6407.01	0	3939.55	3945.04	39495.7	6103.23	54391.5	5501.39	10473.5		2327.39	14980	3852.16	11478	8770.87	2173.24	21375.1
TG(38:01)_[M+NH4]1+	682.598	3.82895	0.125	400.157	281.128	0	0	250.195	816.44	163.547	407.335	20.0073	71.7021	141.468	0	1263.3	23.247	179.524	145.631	71.0474	64.3468	1734.59	130.301	341.141	139.727	63.1962	1383.79	837.185	0	409.921	991.082	849.546	3848.98	0	1985.36	2714.63	28583.2	3382.23	37418.5	4389.09	7224.57		1970.18	9792.42	2104.62	6757.36	5917.2	739.605	14205.3
TG(40:00)_[M+NH4]1+	712.645	4.03622	0.05	258.484	64.31	57.5255	200.792	409.753	270.498	98.5649	653.054	66.7459	74.0354	154.899	368.876	1690.11	188.635	149.599	292.849	51.753	0	1442.35	83.0238	629.011	140.602	0	1025.93	973.933	120.599	340.548	721.347	359.979	3347.97	137.45	2428.4	1629.14	27297.2	3347.75	36047.5	2290.38	5549.52		1010.29	10564.3	2338.83	6967.91	4675.81	836.467	12225.3
TG(40:01)_[M+NH4]1+	710.629	3.44765	0.1375	186.022	0	219.208	87.072	86.8148	332.739	85.7001	155.615	65.4501	78.7063	131.179	0	503.776	0	133.789	0	0	102.991	1197.48	0	105.434	140.669	71.8694	760.887	369.91	0	85.2515	496.594	555.273	1780.97	65.9382	808.425	1442.06	20894	2542.63	29803.3	1884.16	4882.71		664.604	7811.74	1402.19	5164.64	3052.06	303.469	11259.5
TG(40:02)	708.614	6.21995	0.475	0	0	0	0	38.5345	111.381	0	0	0	0	234.457	0	0	0	0	122.241	67.4304	68.3008	205.405	0	86.3533	0	0	0	0	0	0	0	0	148.562	0	89.263	0	6146.11	135.155	11295.8	306.14	1005.53		0	1137.87	173.305	664.822	365.368	120.242	2389.95
TG(42:00)_[M+NH4]1+	740.676	3.32395	0.1	98.8503	0	46.7543	57.5133	82.7032	499.521	171.352	370.766	0	77.5644	70.0926	86.9546	677.587	95.0701	244.12	0	0	61.4978	1345.67	78.1945	275.148	99.7354	0	488.27	755.312	0	699.075	1280.3	273.812	3416.77	70.9305	2355.53	2663.83	23229.3	2459.55	30562.3	1868.34	3596.27		693.893	9064.95	2638.67	5112.74	3749.3	1011.13	10720
TG(42:01)_[M+NH4]1+	738.661	3.90668	0.2875	65.1821	65.2231	0	129.164	0	376.472	0	0	0	0	133.436	0	301.101	85.187	194.373	247.566	0	0	395.86	69.8461	152.892	0	69.6139	265.526	226.83	0	89.6762	193.165	0	1197.94	0	89.7421	627.561	12914.2	1130.1	18869.1	1109.33	2125.18		273.47	5517.38	959.425	3052.94	1060.18	201.737	6588.06
TG(44:00)_[M+NH4]1+	768.708	5.67219	0.0125	438.091	114.628	315.872	375.97	350.461	815.727	93.1284	351.423	158.268	311.316	618.764	463.953	1627.45	384.1	138.914	371.861	255.668	123.005	1797.76	0	571.669	140.159	68.3063	1344.93	955.269	169.68	1149.2	1396.54	673.23	3572.88	244.278	1630.2	2447.32	23273.2	3050.89	28369.2	2097.36	4761.37		1037.9	9823.67	2155.74	6203.4	3754.9	896.946	11360
TG(44:01)_[M+NH4]1+	766.692	4.36559	0.1625	0	78.4329	68.0216	212.658	96.866	468.704	59.0099	165.992	45.6843	260.455	0	75.2199	336.095	75.3963	200.03	75.191	0	128.397	778.718	0	84.81	89.9265	140.402	510.566	601.454	62.2677	525.786	239.636	0	1349.96	52.4132	503.158	971.135	15442.6	1312.58	22353	1043.93	2674.72		614.015	6742.44	1139.08	3104.71	2428.93	328.958	9347.65
TG(46:00)_[M+NH4]1+	796.739	2.70528	0.0625	152.87	0	218.181	73.9373	102.741	498.872	0	420.727	263.892	132.934	242.633	75.5425	903.777	60.8296	88.1173	0	135.641	179.931	1299.38	0	149.485	158.715	135.435	938.123	527.007	235.242	167.562	966.731	532.463	2547.1	97.3124	1773.25	1875.3	23078.2	2169.36	27811.7	994.651	4476.43		701.026	9573.24	3118.63	5300.13	3169.4	767.482	10026.2
TG(46:01)_[M+NH4]1+	794.723	3.20948	0.075	183.794	0	214.466	288.437	266.298	264.719	171.943	450.972	156.989	220.448	568.74	98.1099	955.927	92.1676	97.5992	151.265	0	179.396	1624.76	251.936	269.012	111.209	0	1055.69	844.511	0	435.464	725.622	617.556	2897.1	90.7701	1916.01	2028.43	18887.1	2967.72	23946.4	2446.49	5312.36		1055.7	8237.03	2397.12	4395.12	3665.18	493.219	10022.1
TG(46:02)_[M+NH4]1+	792.708	5.57583	0.3	45.9539	227.088	112.111	257.262	0	0	0	0	0	58.813	166.363	94.7137	0	106.198	159.742	0	0	68.1448	0	0	126.629	0	79.0313	212.594	64.6454	0	0	67.8884	82.4755	111.826	67.4335	332.614	124.236	4753.18	322.551	7959.76	340.782	332.594		93.0976	1595.75	132.667	1249.61	425.712	80.2609	1635.96
TG(46:04)_[M+NH4]1+	788.676	6.85643	0	10766.6	7823.47	11345.6	15877.9	16085.6	22603.5	10252.8	16084.2	12686.8	7467.91	17105.9	12866.9	13895.2	20697.4	15156.9	11347.6	13592.2	16180.5	24169.9	23040.2	25760.6	29220.9	9637.6	41981.7	22353.9	14465.6	21806.2	25732.6	26767.2	34935	16689.5	30659.1	18551.6	16108.2	17756.9	11359.3	37785	30442.2		29453.9	14861.7	18372.5	20689.8	15040.7	19833.9	29033.7
TG(48:00)_[M+NH4]1+	824.77	1.27308	0.0375	871.912	244.843	255.772	746.457	391.566	614.044	209.123	991.129	340.389	443.073	965.28	100.483	815.348	796.132	1287.79	312.67	69.5682	108.074	1064.73	263.589	539.785	307.888	169.555	1046.2	501.932	0	398.672	1225.53	889.519	3112.33	72.0722	2247.24	1580.18	21698.7	2629.95	22731.2	1769.53	3872.25		1694.46	8868.66	2720.19	4132.77	4529.98	1082.86	9496.19
TG(48:01)_[M+NH4]1+	822.755	2.69548	0	2560.75	927.778	1075.38	1519.45	1730.48	3362.21	1535.83	1990.75	1188.53	1442.13	2284.07	658.794	2669.88	2105.75	827.102	1605.46	879.14	762.102	4333.01	1303.3	1752.1	2031.04	559.921	4950.68	3491.36	576.849	2500.3	3621.2	2559.65	7515.66	1091.25	6123.71	5296.41	29394.8	6227.85	35873	6066.7	8063.31		4425.68	15008.1	3585.28	8473.81	7182.76	2380.93	15918.3
TG(48:02)_[M+NH4]1+	820.739	2.18032	0.0625	89.4675	131.33	232.431	605.068	548.821	871.048	397.96	785.67	235.16	0	290.872	95.487	282.059	0	277.365	268.178	0	82.6708	689.956	418.998	664.251	888.772	70.2123	1468.56	878.609	53.7909	329.247	1020.55	457.777	1922.09	222.276	2187.19	1076.4	9954.03	996.456	12032.6	2238.26	3273.73		1085.5	4594.94	1722.15	2873.82	1683.81	627.617	5821.21
TG(48:04)_[M+NH4]1+	816.708	7.22719	0	17658.4	14538.4	26236.5	23837.6	33143.4	36981.8	18094.6	28925.9	28430.8	15913.6	26431.7	25486.4	27535.1	42017.4	30719.4	18905.7	29368	33448.2	49182	41745.8	49479.1	55301.5	19542	72159.1	45115.3	25479.3	42109.7	49887.2	45162.5	68233.9	30491.3	53833.6	39191.4	32443.1	36120.4	20809.6	66929.5	52279.6		54823	28626.6	36102.1	45482.3	31634.3	35456.5	52655.1
TG(48:05)_[M+NH4]1+	814.692	7.85113	0	24733.2	20139.3	32373.3	31827.8	43065.4	47675	23330.5	36640.7	35973.4	19770.7	35138.5	32552.8	36808.9	54397.6	38189.4	26823.5	38981.9	41724.8	62296.1	54165.6	63893.3	72657.9	24491.5	95744.6	55512.1	33426.1	55612	65542.6	61731.6	88000	40847.8	72517.9	49995.3	43449.5	44302.3	28246.1	89284.7	71179.7		71897	38295.4	45817.9	58049.2	43090.4	46747.7	72294.1
TG(48:06)_[M+NH4]1+	812.676	7.7091	0	6868.76	5995.3	10627.8	9988.56	14304.9	15825.5	7152.55	11349.6	11668.9	6165.26	10796.1	10904	11097.6	18658.7	12487.9	8187.05	12530.7	13809.5	20938	18798.7	21985.4	25207	7885.68	33542.5	17847.2	10814	17512.8	20797	20671.8	29185.5	14254.2	25283.3	16633.6	14465	14020	9415.22	29078.9	23159.5		24233.4	12602.9	15764	18743.3	14322.1	16831.7	24546.2
TG(48:07)_[M+NH4]1+	810.661	8.31821	0.0625	63.0456	0	159.287	176.818	90.4321	187.501	86.3342	0	360.831	74.5666	413.64	156.993	80.267	273.982	257.295	65.7702	70.5235	551.366	726.42	424.062	1213.61	1447.64	66.0467	1292.39	747.994	426.45	381.284	430.231	576.536	1116.38	203.461	578.149	767.81	373.195	661.215	0	1257.74	376.456		795.978	417.271	716.992	815.287	0	564.203	1074.91
TG(49:01)_[M+NH4]1+	836.77	2.81428	0.375	83.4225	0	0	0	0	0.814404	0	157.694	0	0	70.8168	215.864	0	99.3282	77.4293	0	0	75.0833	253.496	0	71.6299	83.4093	69.8416	171.271	84.9591	0	120.058	164.771	86.1491	201.158	0	149.328	238.177	4566.15	0	6041.64	167.1	449.097		0	895.402	184.982	268.802	163.041	0	792.137
TG(50:00)_[M+NH4]1+	852.802	5.86464	0.05	341.956	0	84.5128	48.9693	336.984	193.775	28.0671	303.23	127.288	142.956	521.278	76.9271	61.489	114.982	206.56	298.923	129.945	190.105	493.95	343.147	174.44	549.959	143.088	653.092	387.551	0	241.69	331.818	347.95	289.005	285.001	524.156	983.271	11947.7	893.969	13180.4	436.432	1205.66		419.809	4963.79	834.766	2002.52	1079.89	293.095	3082.11
TG(50:01)_[M+Na]1+	855.741	1.8153	0	848.541	876.856	682.196	1042.7	1575.33	2718.18	1002.14	1528.9	2605.33	1216.97	1277.55	1152.25	494.685	1831.97	577.105	1219.55	357.281	659.499	1486.99	1342.71	1652.78	1776.52	364.077	3270.47	1366.8	488.296	907.97	697.583	1659.37	2650.48	785.097	2118.19	1768.45	2953	1471.5	4129.18	2509.75	2611.78		1498.5	1528.22	1401.61	1625.1	1234.42	759.35	2223.75
TG(50:01)_[M+NH4]1+	850.786	0.901624	0	11680.8	6674.12	7868.7	8798.36	9859.12	14300.8	8001.48	11757.4	11398.5	7729.85	10825.2	8670.84	9518.73	11910.8	8704.07	11585.8	6696.84	6280.73	12790.1	8396.84	10636.5	12165.9	4000.45	18016	10695	4426.71	10476	11976.2	11000.2	18567.9	8351.35	16842.5	12802.7	43303.3	15389.7	48846.6	17983.1	20107.8		13701.5	24889	12134	20029.3	14340.7	10133.1	26571
TG(50:02)_[M+Na]1+	853.726	0.677179	0.025	390.272	153.914	288.744	251.977	185.323	499.935	442.292	569.781	900.215	184.722	516.48	260.872	651.212	471.944	201.852	464.693	69.4069	234.329	335.617	167	1301	477.05	88.2235	1649.12	557.266	0	378.508	281.912	790.586	1048.88	230.755	980.726	642.743	669.491	452.357	819.682	979.415	1484.61		745.828	290.757	74.7718	1003.14	202.974	336.977	676.213
TG(50:02)_[M+NH4]1+	848.77	1.53908	0	8592.79	4721.45	5397.88	5626.26	7275.45	11208.6	6202.14	8836.79	9176.05	5478.54	7146.54	5380.45	6784.87	9437.63	6096.63	9069.41	4939.36	5000.69	9019.52	7392.24	8327.72	12069.6	3326.63	16731.6	9210.87	4046.41	8625.18	9124.54	8740.16	14115.7	7171.08	14605.3	8424.14	21116.1	9388.28	23800.7	13166.1	14752.1		12508.8	12679.9	8642.33	11465.7	8915.62	7937.88	18134.1
TG(50:03)_[M+NH4]1+	846.755	3.46371	0	683.113	527.884	1077.56	596.879	1477.33	2424	843.976	1821.74	1298.6	658.722	563.373	758.731	755.495	1255.38	995.645	2155.59	451.677	1364.5	2436.71	1697.23	2059.29	3326.8	770.118	5564.03	1723.74	333.541	1575.08	2594.1	2029	3800.11	1374.41	5099.05	2005.8	5624.57	1604.54	5971.71	4149.94	4729.45		3576.8	2821.07	1775.39	2231.22	1738.84	1588.24	5733.56
TG(50:04)_[M+NH4]1+	844.739	5.81906	0.0375	73.6538	0	253.922	75.9253	387.718	278.295	73.6427	82.1024	314.538	0	82.0463	94.1036	171.95	271.033	181.978	98.4943	155.468	317.6	437.939	582.186	474.06	826.614	82.896	1219.51	453.035	0	515.544	419.354	446.726	1219.05	127.403	299.788	282.493	172.262	105.149	362.133	1262.97	626.305		1023.74	210.809	69.9185	272.317	270.644	204.006	814.72
TG(50:06)_[M+NH4]1+	840.708	6.75956	0.1625	73.6868	114.704	0	77.8565	325.687	195.406	170.007	90.5651	0	0	75.3756	0	74.5298	160.985	0	0	0	0	466.655	88.0513	214.353	330.254	0	1334.72	431.255	225.871	253.967	713.261	367.363	1005.42	301.453	458.487	197.105	71.5107	86.651	173.452	436.595	678.585		292.528	65.8228	0	169.159	92.9749	399.94	182.742
TG(51:01)_[M+NH4]1+	864.802	4.42003	0.425	46.0961	0	0	0	93.3685	0	0	104.187	137.21	0	75.9467	0	0	0	0	76.2117	90.3104	0	0	159.742	0	0	0	0	0	0	174.838	75.588	0	95.3637	0	89.708	81.5099	1848.16	188.064	4619.01	0	0		81.1648	790.951	212.936	132.496	0	70.8005	533.206
TG(51:02)_[M+NH4]1+	862.786	3.2379	0.4125	121.978	0	0	0	77.9031	101.027	0	79.1915	80.7877	0	0	66.1741	78.6409	0	82.4913	72.7997	0	68.6884	0	0	80.4215	0	138.506	234.337	95.7357	0	225.953	113.805	0	395.427	0	0	73.1556	1186.16	196.194	2457.49	105.996	311.346		0	541.065	74.0525	71.9076	0	75.111	476.527
TG(51:05)_[M+NH4]1+	856.739	7.06711	0.0375	670.848	76.1019	157.246	87.7503	227.384	910.249	160.551	336.95	882.731	166.365	297.707	419.735	215.653	415.509	174.563	138.773	332.807	209.393	386.841	231.469	521.233	905.516	147.572	1122.09	75.9044	83.3808	74.222	516.633	322.016	295.552	124.322	238.588	83.757	730.201	188.487	1221.62	1127.83	950.749		288.304	559.836	262.903	891.647	68.2369	0	966.368
TG(52:01)_[M+NH4]1+	878.817	6.33427	0	1988.85	1045.91	729.261	622.751	915.185	1739.48	895.621	1449.06	1189.17	813.181	1500.61	386.501	1109.82	2037	1082.8	1286.16	428.411	500.615	1382.55	1131.18	682.655	2331.58	333.616	3491.51	1303.32	647.012	1532.09	1379.14	1280.94	2981.4	1064.81	2638.05	2755.47	18359.1	2841.88	20897.6	2881.36	3066.56		2091.98	9154.91	1810.94	4920.04	3145.85	998.113	6528.68
TG(52:02)_[M+Na]1+	881.757	0.442299	0.0125	2584.36	1061.2	786.52	908.92	1216.33	2288.77	666.643	1474.51	4346.61	1599.39	1088.21	1759.07	517.921	2064.33	160.82	1560.71	842.226	755.365	730.961	1442.2	1995.05	761.133	343.624	2004.05	1080.46	71.9328	932.288	1012.04	1198.66	2030.89	611.371	1723.54	1840.28	2049.97	2222.26	1418.76	1143.09	1657.58		1260.24	1580.25	879.791	2509.38	855.084	679.242	2294.37
TG(52:02)_[M+NH4]1+	876.802	1.54474	0	26544.1	19506.5	20200.3	20097.1	24196.1	34896.4	21533.2	28362.8	30583.9	20140.4	22271.7	20745.8	18935.1	29425.7	21241.7	29547.8	17803.1	18325.8	25364.4	23015.5	28835	30690.6	12735.2	44492.7	24132.7	13983.7	24820.1	26399.3	26419.4	41545.6	21893.7	36855.4	24504.7	38148.9	27190	39205.1	39757.9	40470		32126.6	28282.2	22939.5	28428	24248.2	23265.8	40397.2
TG(52:03)_[M+Na]1+	879.741	0.902672	0.0125	876.353	480.18	266.192	723.432	560.124	1224.98	461.242	692.233	2050.23	759.987	762.185	458.129	634.937	1495.36	403.055	892.489	553.627	404.035	137.658	551.656	1031.04	602.146	159.021	721.817	406.908	0	839.961	867.611	740.539	1108.12	254.829	426.514	1400.1	464.861	1330.32	973.328	1421.08	1345.35		552.011	676.972	655.101	1015.25	572.217	298.102	705.064
TG(52:03)_[M+NH4]1+	874.786	2.13289	0	18248.9	13484.2	15059.3	14110.6	17633.4	26072.4	16073.9	20161.2	23736.9	14168.4	16961.7	15169.7	13399.7	23290.7	17111	20958.9	14267.6	15549.6	21751.6	19424.3	23575.6	28158.1	11568.3	40852.1	21397.7	12653	20057	22188	24225.3	35294.7	18778.6	34695.3	19965.3	22628.8	20847.4	19925.9	34061.7	32824		29615.7	17424.8	17997.8	21827.2	19109.1	19031.4	31912.5
TG(52:04)_[M+NH4]1+	872.77	1.91599	0	7056.71	4462.91	4065.92	4389.08	6862.05	9936.66	6589.57	8112.19	8884.49	4560.6	6176.94	4350.23	4679.98	8153.92	5622.08	8755.27	4621.11	5714.15	8597.92	6840.84	9554.36	11805.3	4222.5	16161.7	7485.64	4293.26	6750.43	9393.44	9389.12	14335.3	6418.65	14360	7994.28	7503.58	7419.16	6939.17	13029.2	13536.4		12325.7	6148.88	6828.22	8349.45	6030.87	8187.9	12323.7
TG(52:05)_[M+NH4]1+	870.755	3.0417	0.1875	0	0	155.672	58.3476	72.9933	97.6632	87.9439	0	100.935	120.107	74.4132	84.1375	0	100.436	162.823	84.6196	0	166.779	88.413	91.4501	413.139	237.529	0.587696	580.756	59.5457	0	72.4627	252.645	139.504	910.836	70.3062	455.747	81.7383	332.351	368.694	265.829	474.664	356.836		161.203	84.656	371.884	195.458	0	174.717	664.489
TG(53:05)_[M+NH4]1+	884.77	6.21813	0.275	73.9276	201.325	0	0	65.4214	197.362	55.2716	186.413	174.599	75.7017	135.264	234.853	0	0	0	165.357	0	94.8713	75.0258	67.9879	83.891	0	0	327.053	0	0	79.6286	0	75.1343	0	0	99.6194	69.2809	201.06	190.967	171.263	167.712	439.758		152.182	284.923	94.2701	0	180.661	353.847	74.9151
TG(53:06)_[M+NH4]1+	882.755	7.23238	0.0125	1135.57	292.073	321.725	171.16	823.292	1468.75	188.418	512.867	1088	240.775	176.592	136.707	168.069	789.351	271.844	583.723	133.242	349.95	382.583	187.278	959.155	347.84	0	816.577	724.794	87.4918	260.917	370.804	87.6218	784.244	144.617	572.281	746.56	1079.9	603.891	346.392	717.524	967.309		424.829	241.919	208.555	983.256	311.208	540.851	267.274
TG(53:07)_[M+NH4]1+	880.739	6.3535	0.125	627.257	179.864	358.745	180.568	180.235	286.775	75.6955	292.753	479.367	312.222	213.296	88.3075	126.415	242.455	0	439.49	140.406	70.4383	173.808	0	358.889	0	65.0689	227.028	395.813	0	367.263	391.284	314.393	417.376	190.569	280.089	467.303	456.365	446.026	101.124	298.351	470.341		225.398	201.681	144.302	379.195	57.7272	0	335.615
TG(54:02)_[M+NH4]1+	904.833	4.2948	0	2223.41	1176.6	1033.09	951.726	1318.19	2016.43	620.461	1230.43	2293.21	1027.62	863.366	1140.33	545.703	1994.47	964.079	1644.81	802.076	123.331	1083.63	1021.72	900.199	797.407	217.296	2268.87	1450.4	321.044	889.69	649.296	958.427	1756.82	642.987	1833.73	1227.33	4409.48	1576.16	5666.94	2151.64	1815.95		1435.79	3149.87	1227.33	2301.24	983.667	858.647	2114.55
TG(54:04)_[M+NH4]1+	900.802	1.60616	0	10145.4	6956.85	5828.56	6226.25	7967.09	12272.3	6264.74	9836.59	11253.2	6265.65	8099.51	7665.81	6281.29	11150.8	6823.6	10475.8	5524.9	4715.73	8458.39	6959.93	8049.16	10590.2	3148.5	14537.6	7461.32	4034.35	7264.7	8406.95	9017.34	13496.1	7026.01	12898.4	7607.69	7599.03	7787.72	6553.59	11723.7	12849.1		10401.6	5789.56	6400.92	8679.82	6465.22	8365.8	11484.8
TG(54:05)_[M+NH4]1+	898.786	1.50056	0	6118.51	3038.74	4055.05	2686.16	5295.09	7443.56	3741.31	6408.31	6687.65	3580.88	5245.65	4180.59	2700.6	6524.8	4407.09	8123.37	2664.2	2296.98	4232.89	4032.94	5159.34	7301.87	1286.13	10522.3	4075.04	1370.35	4151.9	4789.88	5177.81	8770.28	3638.91	8084.63	3840.29	3516.84	4364.46	3290.39	7013.64	7025.06		6668.26	2775.34	3569.75	4416.73	3834.79	4553.59	6264.25
TG(54:06)_[M+NH4]1+	896.77	1.75869	0	1614.4	862.364	594.711	534.938	1376.94	2807.67	904.351	1858.63	2298.1	493.876	757.973	500.838	485.667	1699.13	734.199	2181.69	385.39	165.484	450.701	872.402	1204.98	1536.62	330.703	4476.85	670.141	223.55	943.152	1067.68	1133.73	1674.16	687.04	1945.43	706.76	438.572	602.597	536.972	1620.92	2074.6		1407.5	659.814	609.732	961.392	1036.68	1257.87	807.636
TG(57:09)	932.771	8.47818	0.35	44.7084	52.6635	111.919	36.7144	39.8645	133.633	0.366248	23.4356	0.214335	59.2751	0	0	0	392.913	57.4653	0	0	34.3722	43.9827	0	115.403	155.031	0	90.7258	59.0618	68.4902	0	181.111	0	258.095	55.7586	268.516	38.1287	0	0	68.8055	139.727	327.367		32.0117	0	0	70.5445	0	48.918	273.32
TG(57:10)	930.755	8.8805	0.325	127.659	64.6728	89.0987	89.4579	19.8608	2.10179	0	154.489	148.616	103.225	0	0	65.5027	127.528	151.269	119.132	0	51.3667	0	34.271	44.7004	0	0	504.752	73.2402	0	0	51.4227	40.235	456.925	46.0071	51.7416	75.2549	54.9302	0	0	154.368	233.643		38.0787	32.6166	0	65.9778	35.903	0	76.4914
TG_oxid(36:00)	672.577	1.86059	0	1905.33	520.605	700.974	1083.71	220.235	481.721	78.9755	184.737	2413.79	1292.17	792.045	854.921	388.578	221.277	230.636	694.625	4118.16	2730.86	4780.37	2973.07	8527.11	1645.05	69.7063	1759.13	4210.24	1840.12	5406.14	4366.91	2705	4605.94	613.472	1837.79	4767.55	3710.02	4658.28	729.597	3527.92	1869.4		244.834	4132.52	2095.81	4650.87	1690.31	1425.84	3414.13
TG_oxid(51:06)	870.718	6.87332	0.15	66.3137	74.8215	95.0017	195.412	90.8848	217.527	251.48	0	167.665	212.558	168.514	79.3223	177.187	600.973	0	87.5383	0	197.07	241.435	114.832	473.258	511.513	262.2	509.216	196.601	0	77.9251	362.228	236.061	204.097	296.189	897.693	81.5798	162.668	157.443	0	599.618	740.479		229.07	87.0219	0	87.7938	153.509	85.0393	583.505
TG_oxid(52:02)	892.796	3.53352	0.4	58.6472	145.777	77.04	270.479	76.6575	207.389	148.162	0	86.8324	0	0	72.4695	0	0	118.711	75.9748	0	0	83.7916	0	142.185	68.3459	151.518	240.96	0	0	75.8773	79.0643	143.575	171.576	0	379.248	0	0	84.7263	0	150.751	304.048		83.7048	0	62.8309	64.3483	0	0	93.6156
TG_oxid(52:03)	890.781	3.68657	0.2875	0	138.154	0	108.649	172.267	181.362	74.0749	89.3419	220.225	80.7239	86.2051	218.339	0	379.077	94.6796	147.833	90.4839	0	354.825	170.545	0	0	67.2349	752.492	0	0	0	286.717	187.756	86.9583	335.44	198.309	50.3911	0	167.142	258.792	207.667	345.396		200.458	83.0012	0	0	87.9929	78.8373	287.342
TG_oxid(53:03)	904.796	7.26648	0.0875	6.51702	67.3514	0.108479	62.7493	3.85844	430.794	158.69	2.51803	136.117	0.384881	56.3487	118.964	38.1459	340.194	77.2917	6.03556	287.339	0.212218	2.0124	2.43492	1.83963	51.7553	158.31	59.5839	89.7865	0	71.6384	3.07792	20.5424	384.995	1.95254	4.53304	0.800053	0	51.6917	0	61.4975	215.091		6.64905	0.439294	0.865482	1.57989	51.057	1.08232	508.121
TG_oxid(53:05)	900.765	8.51737	0.325	71.8932	71.8697	139.079	164.417	76.0633	306.9	0	96.4989	1.9929	0	71.1114	74.352	47.9447	204.806	0	0	0	0	67.9301	0	109.577	78.4413	0	511.943	85.9689	0	0	92.6887	0	87.5171	93.6861	237.024	0	0	0.704848	58.06	0	147.737		0	0	65.121	90.0042	78.8504	0	307.637
TG_oxid(53:06)	898.749	8.60549	0.15	233.145	177.82	0	141.66	385.885	330.019	210.714	89.7085	226.096	43.4125	164.47	79.9077	113.473	712.468	92.152	75.5943	113.012	0	141.299	153.874	212.238	54.4523	0	686.772	67.7996	0	0	368.539	114.058	450.694	375.08	267.525	227.881	182.867	262.15	0.523735	100.779	629.968		122.745	74.4608	91.9395	147.455	255.806	97.5557	506.957
TG_oxid(53:07)	896.734	7.63186	0.35	82.9378	0	0	79.8904	210.746	93.6694	0.117721	74.7657	0	164.782	119.318	342.161	0	200.087	0	169.5	0	0	82.6986	0	83.3142	77.4917	0	486.079	0	0	0	78.0578	149.475	153.982	92.993	568.308	0	227.513	152.375	67.5091	92.3405	225.449		121.493	0	81.7554	0.473897	79.4648	0	295.064
[truncated: 44 more columns]

## Sheet: -ve
DBS time course (-ve)
				00h	00h	00h	00h	00h	00h	00h	00h	00h	00h	00h	00h	00h	00h	00h	00h	16h	16h	16h	16h	16h	16h	16h	16h	16h	16h	16h	16h	16h	16h	16h	16h	24h	24h	24h	24h	24h	24h	24h	24h	24h	24h	24h	24h	24h	24h
				232594	178003	199629	247471	141354	220050	101321	36633.7	226503	186257	268331	198007	161639	187891	172684	59991.9	334164	305739	375952	282826	307634	345851	97119.2	293376	431799	263469	371411	340459	347624	357110	187491	269983	385465	284892	276890	107425	401910	248575	156253	179781	296727	292245	350915	215699	262685	310415
				26	37	54	38	39	31	53	72	36	33	41	47	33	46	48	72	15	9	5	10	8	7	32	9	9	17	9	8	6	6	22	10	5	10	10	33	3	11	30	24	12	10	6	17	16	14
				DBS_00h_01_Box1	DBS_00h_02_Box1	DBS_00h_03_Box1	DBS_00h_04_Box1	DBS_00h_05_Box1	DBS_00h_06_Box1	DBS_00h_07_Box1	DBS_00h_08_Box1	DBS_00h_09_Box1	DBS_00h_10_Box1	DBS_00h_11_Box1	DBS_00h_12_Box1	DBS_00h_13_Box1	DBS_00h_14_Box1	DBS_00h_15_Box1	DBS_00h_16_Box1	DBS_16h_01_Box1	DBS_16h_02_Box1	DBS_16h_03_Box1	DBS_16h_04_Box1	DBS_16h_05_Box1	DBS_16h_06_Box1	DBS_16h_07_Box1	DBS_16h_08_Box1	DBS_16h_09_Box1	DBS_16h_10_Box1	DBS_16h_11_Box1	DBS_16h_12_Box1	DBS_16h_13_Box1	DBS_16h_14_Box1	DBS_16h_15_Box1	DBS_16h_16_Box1	DBS_24h_01_Box1	DBS_24h_02_Box1	DBS_24h_03_Box1	DBS_24h_04_Box1	DBS_24h_05_Box1	DBS_24h_06_Box1	DBS_24h_07_Box1	DBS_24h_08_Box1	DBS_24h_09_Box1	DBS_24h_10_Box1	DBS_24h_11_Box1	DBS_24h_12_Box1	DBS_24h_13_Box1	DBS_24h_14_Box1
x.targets.name	targets.mz	Deviations	0s	Furse_Ex048_A10_DBS_00h_01_Box1.mzXML	Furse_Ex048_B10_DBS_00h_02_Box1.mzXML	Furse_Ex048_C10_DBS_00h_03_Box1.mzXML	Furse_Ex048_D10_DBS_00h_04_Box1.mzXML	Furse_Ex048_E10_DBS_00h_05_Box1.mzXML	Furse_Ex048_F10_DBS_00h_06_Box1.mzXML	Furse_Ex048_G10_DBS_00h_07_Box1.mzXML	Furse_Ex048_H10_DBS_00h_08_Box1.mzXML	Furse_Ex048_A11_DBS_00h_09_Box1.mzXML	Furse_Ex048_B11_DBS_00h_10_Box1.mzXML	Furse_Ex048_C11_DBS_00h_11_Box1.mzXML	Furse_Ex048_D11_DBS_00h_12_Box1.mzXML	Furse_Ex048_E11_DBS_00h_13_Box1.mzXML	Furse_Ex048_F11_DBS_00h_14_Box1.mzXML	Furse_Ex048_G11_DBS_00h_15_Box1.mzXML	Furse_Ex048_H11_DBS_00h_16_Box1.mzXML	Furse_Ex048_A08_DBS_16h_01_Box1.mzXML	Furse_Ex048_B08_DBS_16h_02_Box1.mzXML	Furse_Ex048_C08_DBS_16h_03_Box1.mzXML	Furse_Ex048_D08_DBS_16h_04_Box1.mzXML	Furse_Ex048_E08_DBS_16h_05_Box1.mzXML	Furse_Ex048_F08_DBS_16h_06_Box1.mzXML	Furse_Ex048_G08_DBS_16h_07_Box1.mzXML	Furse_Ex048_H08_DBS_16h_08_Box1.mzXML	Furse_Ex048_A09_DBS_16h_09_Box1.mzXML	Furse_Ex048_B09_DBS_16h_10_Box1.mzXML	Furse_Ex048_C09_DBS_16h_11_Box1.mzXML	Furse_Ex048_D09_DBS_16h_12_Box1.mzXML	Furse_Ex048_E09_DBS_16h_13_Box1.mzXML	Furse_Ex048_F09_DBS_16h_14_Box1.mzXML	Furse_Ex048_G09_DBS_16h_15_Box1.mzXML	Furse_Ex048_H09_DBS_16h_16_Box1.mzXML	Furse_Ex048_A06_DBS_24h_01_Box1.mzXML	Furse_Ex048_B06_DBS_24h_02_Box1.mzXML	Furse_Ex048_C06_DBS_24h_03_Box1.mzXML	Furse_Ex048_D06_DBS_24h_04_Box1.mzXML	Furse_Ex048_E06_DBS_24h_05_Box1.mzXML	Furse_Ex048_F06_DBS_24h_06_Box1.mzXML	Furse_Ex048_G06_DBS_24h_07_Box1.mzXML	Furse_Ex048_H06_DBS_24h_08_Box1.mzXML	Furse_Ex048_A07_DBS_24h_09_Box1.mzXML	Furse_Ex048_B07_DBS_24h_10_Box1.mzXML	Furse_Ex048_C07_DBS_24h_11_Box1.mzXML	Furse_Ex048_D07_DBS_24h_12_Box1.mzXML	Furse_Ex048_E07_DBS_24h_13_Box1.mzXML	Furse_Ex048_F07_DBS_24h_14_Box1.mzXML
2H-IS__PA_[M-H]1-	701.66	7.24888	0	4830.08	4484.2	4796.88	5096.82	3758.26	4868.06	2824.68	1075.14	5174.09	4065.26	4639.76	4919.83	3833.91	4817.2	3806.65	1640.03	4945.16	3940.56	5266.66	4554.13	4646.2	4145.67	1466.81	4401.75	4568.26	3643.66	4952.45	5400.47	3904.72	4609.78	3153.61	4590.72	4728.25	4420.64	4679.01	2038.34	4429.75	3686	2970.14	2996.42	5168.98	3885.3	5115.27	4046.54	4782	4766.13
2H-IS__PA_[M-H]1-	702.666	4.6982	0	20640.3	19815	21368.5	22708.4	16968.4	21942.3	11635.8	4605.8	23459	18206	20231.2	22114.4	17112	21067.6	17127.5	7062.01	21621.7	16790.3	22867.5	20098.8	20277.4	17952.3	6339.94	19340.3	19778.9	16173.6	21884.1	23977.4	17306	20823	13317.8	19627.5	20745.2	19113.9	21041.6	8586.55	20004.5	16384.3	13249.3	13008.1	22192.2	16413.7	23416.5	18080.4	21428.7	20793.7
2H-IS__PA_[M-H]1-	703.671	2.2563	0	35074.6	32642.8	35607.3	37627.3	28592.3	36414.7	19474.1	7603.55	39137.8	30429.2	33807.5	36288.7	28443	35123.1	28317	11773.2	36893.9	28720.4	37941.5	33247.8	33578.8	30181.2	10542.7	32593.2	33471.2	27244.7	36760.2	40246.5	28736.7	34074	22523.9	32370.6	34489.2	32502.1	34501.8	14472	32807.7	27229.4	22068.5	21458.7	37067.9	28027.5	38572.2	29061.9	35433.3	34741
2H-IS__PA_[M-H]1-	704.676	1.78963	0	23104.7	21840.5	23511	24964.9	18855.2	23605	12637.4	4934.86	25781.3	19995	22646	24205.9	18400.9	23588.6	18740.8	7755.02	24154.4	19051.9	25064.4	22272.2	22021.8	20000.2	6931.72	21078.6	22232.6	18041.6	24000.2	26547	18917.1	22442.5	14721.1	21421.5	22615.9	21196.8	22967.9	9263.46	21543.8	17814.1	14647.5	14049.2	24352.8	18444.7	25096.6	19675.1	23538.6	22776.4
2H-IS__PA_[M-H]1-	705.68	2.67544	0	7343.97	7037.51	7629.98	7988.76	6027.23	7631.9	4171.58	1619.2	8423.75	6524.06	7258.48	7710.65	6000.05	7364.58	6165.9	2565.83	7825.76	6206.87	8196.35	7098.39	7118.55	6337.83	2356.35	6930.02	7156.01	5824.53	7666.39	8406.48	6165.11	7326.2	4980.96	7066.07	7367.11	6922.63	7388.73	3159.7	6949.58	5791.54	4805.94	4713.45	7908.64	5953.28	8174.59	6338.24	7503.15	7400.14
2H-IS__PA_[M-H]1-	706.683	4.32937	0	1480.83	1445.8	1570.18	1596.18	1157.22	1613.45	801.941	326.128	1672.14	1304.42	1443.41	1670.22	1181.38	1569.58	1276.66	488.189	1577.17	1228.88	1579.17	1340.13	1428.96	1341.37	465.416	1341.73	1431.26	1147.65	1547.83	1687.24	1257.47	1523.72	1034.74	1449.82	1486.18	1445.16	1446.13	613.653	1360.48	1169.98	963.441	939.072	1622.47	1162.23	1691.26	1275.84	1516.03	1452.64
2H-IS__PA_1[M-H]1-	701.66	7.24888	0	4830.08	4484.2	4796.88	5096.82	3758.26	4868.06	2824.68	1075.14	5174.09	4065.26	4639.76	4919.83	3833.91	4817.2	3806.65	1640.03	4945.16	3940.56	5266.66	4554.13	4646.2	4145.67	1466.81	4401.75	4568.26	3643.66	4952.45	5400.47	3904.72	4609.78	3153.61	4590.72	4728.25	4420.64	4679.01	2038.34	4429.75	3686	2970.14	2996.42	5168.98	3885.3	5115.27	4046.54	4782	4766.13
2H-IS__PA_2[M-H]1-	702.666	4.6982	0	20640.3	19815	21368.5	22708.4	16968.4	21942.3	11635.8	4605.8	23459	18206	20231.2	22114.4	17112	21067.6	17127.5	7062.01	21621.7	16790.3	22867.5	20098.8	20277.4	17952.3	6339.94	19340.3	19778.9	16173.6	21884.1	23977.4	17306	20823	13317.8	19627.5	20745.2	19113.9	21041.6	8586.55	20004.5	16384.3	13249.3	13008.1	22192.2	16413.7	23416.5	18080.4	21428.7	20793.7
2H-IS__PA_3[M-H]1-	703.671	2.2563	0	35074.6	32642.8	35607.3	37627.3	28592.3	36414.7	19474.1	7603.55	39137.8	30429.2	33807.5	36288.7	28443	35123.1	28317	11773.2	36893.9	28720.4	37941.5	33247.8	33578.8	30181.2	10542.7	32593.2	33471.2	27244.7	36760.2	40246.5	28736.7	34074	22523.9	32370.6	34489.2	32502.1	34501.8	14472	32807.7	27229.4	22068.5	21458.7	37067.9	28027.5	38572.2	29061.9	35433.3	34741
2H-IS__PA_4[M-H]1-	704.676	1.78963	0	23104.7	21840.5	23511	24964.9	18855.2	23605	12637.4	4934.86	25781.3	19995	22646	24205.9	18400.9	23588.6	18740.8	7755.02	24154.4	19051.9	25064.4	22272.2	22021.8	20000.2	6931.72	21078.6	22232.6	18041.6	24000.2	26547	18917.1	22442.5	14721.1	21421.5	22615.9	21196.8	22967.9	9263.46	21543.8	17814.1	14647.5	14049.2	24352.8	18444.7	25096.6	19675.1	23538.6	22776.4
2H-IS__PA_5[M-H]1-	705.68	2.67544	0	7343.97	7037.51	7629.98	7988.76	6027.23	7631.9	4171.58	1619.2	8423.75	6524.06	7258.48	7710.65	6000.05	7364.58	6165.9	2565.83	7825.76	6206.87	8196.35	7098.39	7118.55	6337.83	2356.35	6930.02	7156.01	5824.53	7666.39	8406.48	6165.11	7326.2	4980.96	7066.07	7367.11	6922.63	7388.73	3159.7	6949.58	5791.54	4805.94	4713.45	7908.64	5953.28	8174.59	6338.24	7503.15	7400.14
2H-IS__PA_6[M-H]1-	706.683	4.32937	0	1480.83	1445.8	1570.18	1596.18	1157.22	1613.45	801.941	326.128	1672.14	1304.42	1443.41	1670.22	1181.38	1569.58	1276.66	488.189	1577.17	1228.88	1579.17	1340.13	1428.96	1341.37	465.416	1341.73	1431.26	1147.65	1547.83	1687.24	1257.47	1523.72	1034.74	1449.82	1486.18	1445.16	1446.13	613.653	1360.48	1169.98	963.441	939.072	1622.47	1162.23	1691.26	1275.84	1516.03	1452.64
2H-IS__PC_[M+Cl-]1-	822.729	10.2935	0	1694.33	1935.12	2175.55	2033.22	129.361	1456.87	198.14	173.352	1881.36	1296.63	1982.83	2043.32	865.958	1270.26	1183.7	276.049	1958.19	1179.55	2005.3	1804.75	1519.36	1743.15	217.344	1554.41	1590.54	978.445	2371.76	2456.2	1480.63	1840.51	961.284	1499.87	1964.8	1814.86	1786.6	537.48	1669.88	1148.49	689.019	803.067	2075.71	1321.39	1904.58	1116.66	2023.33	1853.1
2H-IS__PC_[M+Cl-]1-	823.735	8.21715	0	7751.68	8642.35	9894.61	9251.07	1247.29	6652.48	1123.58	897.481	8391.05	6161.31	9100.29	9315.71	4100.13	5649.49	5465.3	1370.06	8432.05	5062.51	8508.73	7909.82	6626.32	7659.69	1013.59	7114.84	6985.63	4171.29	10443.6	10793	6588.33	7675.72	4283.78	6749.44	8840.27	7643.39	7713.79	2350.34	7505.68	5156.3	2982.14	3771.58	8913.76	5823.09	8221.5	4830.8	8922.75	8240.99
2H-IS__PC_[M+Cl-]1-	824.741	7.7388	0	12717.4	14389.8	16336.3	15281.6	1966.26	11154.5	1870.07	1513.23	13913.7	10390.6	15157.2	15355.5	6762.44	9641.52	9022.53	2306.32	13997.5	8442.44	14778.9	13352.7	11197.7	12548.7	1732.23	11896.6	11466.9	6526.8	17238.8	17520.5	11226.3	12935.8	7141.16	11063.2	14764	12738.4	12832.8	4055.66	12412.7	8651.91	4816.05	6133.63	15081.6	9401.31	14042.4	8261.71	14799.6	13914.6
2H-IS__PC_[M+Cl-]1-	825.745	6.88469	0	9014.08	10086.8	11381.5	11008.3	1438.56	8159.05	1309.21	1001.7	9874.49	7180.26	10615.1	10872.5	4788.08	6850.28	6247.04	1643.91	9726.37	5896.47	10265.9	9207.54	7884.82	8664.46	1171.38	8153.12	8033.41	4676.64	12094.6	12669.9	7854.43	8897.02	4842.22	7617.93	10182.9	8731.63	8896.06	2948.16	8641.95	6051.11	3385.92	4387.84	10265.7	6627.15	9960.62	5928.06	10456.4	9666.22
2H-IS__PC_[M+Cl-]1-	826.74	10.2163	0	3937.26	4378.23	4882.6	4667.27	626.656	3488.32	546.689	464.789	4174.54	3125.05	4622.52	4559.94	2031.35	2827.62	2698.72	727.391	4173.28	2526.8	4400.93	3977.1	3338.57	3724.44	539.122	3612.42	3592.23	2000.65	5261.77	5395.58	3384.93	3956.6	2112.45	3333.74	4283.17	3865.17	3876.05	1212.84	3814.68	2668.85	1455.61	1874.47	4406.77	2812.2	4150.45	2407.32	4510.38	4084.17
2H-IS__PC_[M+Cl-]1-	827.743	7.8708	0	2579.96	2863.02	3270.6	3076.58	276.915	2206.41	309.747	268.687	2730.83	2037.35	3027.59	2987.81	1322.36	1860.18	1717.27	449.173	2714.51	1573.99	2890.03	2592.73	2198.9	2398.5	332.355	2362.41	2290.75	1248.23	3336.21	3485.68	2081.85	2597.08	1443	2088.32	2850.44	2439.55	2503.68	724.365	2509.77	1690.03	880.087	1169.99	2898.02	1792.78	2618.84	1608.44	2799.94	2648.91
2H-IS__PC_[M+Cl-]1-	828.746	7.75268	0	899.736	1024.45	1126.73	1049.36	80.1275	696.564	63.729	75.1055	975.811	740.161	1025.48	1078.81	439.378	635.012	622.73	117.226	987.303	517.956	964.507	912.237	826.006	862.452	54.981	812.867	768.34	426.727	1282.76	1290.4	819.089	837.197	461.03	750.569	997.255	946.907	874.705	233.443	842.619	588.34	309.513	343.081	990.202	670.254	963.458	577.165	1029.83	963.443
2H-IS__PC_[M+OAC]1-	846.773	6.59858	0	622.172	389.567	342.569	426.805	503.065	574.127	242.317	101.073	763.988	327.882	286.531	397.647	377.094	512.581	249.084	138.01	814.008	365.687	568.401	475.052	554.67	368.928	5.31038	352.308	749.712	370.019	481.1	465.819	444.452	595.796	262.456	519.98	739.599	394.115	583.524	120.995	494.234	513.834	112.124	45.4469	680.867	353.978	700.462	427.37	413.275	471.315
2H-IS__PC_[M+OAC]1-	847.779	7.40317	0	3001.3	1901.62	1602.21	2042.32	2423.72	2820.29	1230.21	630.264	3688.21	2007.84	1570.4	2132.73	2126.28	2449.09	1357.26	727.257	3702.1	1950.1	2800.07	2376.51	2701.52	1970.48	268.517	1786.59	3435.07	1772.84	2318.28	2287.96	2060.77	2729.66	1261.96	2314.83	3407.14	1883.44	2930.85	752.941	2536.15	2384.84	833.594	645.485	3234.73	1792.64	3228.44	2125.1	2134.64	2165.72
2H-IS__PC_[M+OAC]1-	848.784	6.12052	0	5097.64	3144.11	2814.59	3407.18	4044.19	4741.88	2053.77	1087.08	6008.57	3301.38	2705.88	3521.52	3549.01	3939.93	2282.23	1207.34	6083.51	3246.74	4805.12	3908.53	4511.27	3184.62	465.679	2996.21	5656.59	2894.74	3900.08	3686.22	3372.63	4625.05	2328.71	3817.26	5529.16	3201.41	4936.43	1235.1	4289.84	4040.48	1400.13	1076.59	5397.5	3072.19	5238.07	3468.92	3454.23	3635.28
2H-IS__PC_[M+OAC]1-	849.789	6.87082	0	3406.91	2170.71	1952.56	2345.1	2904.6	3231.75	1351.2	758.727	4048.03	2113.13	1804.26	2405.82	2420.83	2751	1480.14	713.964	4162.18	2292	3187.29	2682.49	3146.12	2186.83	289.38	2091.15	3991.51	2109.02	2703.76	2595.81	2326.02	3226.44	1588.76	2560.88	3863.23	2183.5	3462.35	867.965	2857.05	2696.44	1017.62	756.474	3658.58	2099.88	3674.57	2447.21	2404.08	2513.15
2H-IS__PC_[M+OAC]1-	850.792	4.25192	0	1282.89	797.349	695.985	861.618	1027.4	1138.36	491.278	212.355	1501.79	793.498	637.844	810.569	874.417	1023.21	607.058	250.743	1515.91	759.856	1175.65	1027.49	1126.34	808.733	51.5309	709.069	1398.72	746.029	971.439	910.127	821.563	1098.68	504.415	951.196	1413.37	750.995	1208.85	277.605	1030.41	984.727	334.438	149.666	1287.5	720.764	1276.5	852.607	807.318	860.629
2H-IS__PC_1[M+Cl-]1-	822.729	10.2935	0	1694.33	1935.12	2175.55	2033.22	129.361	1456.87	198.14	173.352	1881.36	1296.63	1982.83	2043.32	865.958	1270.26	1183.7	276.049	1958.19	1179.55	2005.3	1804.75	1519.36	1743.15	217.344	1554.41	1590.54	978.445	2371.76	2456.2	1480.63	1840.51	961.284	1499.87	1964.8	1814.86	1786.6	537.48	1669.88	1148.49	689.019	803.067	2075.71	1321.39	1904.58	1116.66	2023.33	1853.1
2H-IS__PC_1[M+OAC]1-	846.773	6.59858	0	622.172	389.567	342.569	426.805	503.065	574.127	242.317	101.073	763.988	327.882	286.531	397.647	377.094	512.581	249.084	138.01	814.008	365.687	568.401	475.052	554.67	368.928	5.31038	352.308	749.712	370.019	481.1	465.819	444.452	595.796	262.456	519.98	739.599	394.115	583.524	120.995	494.234	513.834	112.124	45.4469	680.867	353.978	700.462	427.37	413.275	471.315
2H-IS__PC_2[M+Cl-]1-	823.735	8.21715	0	7751.68	8642.35	9894.61	9251.07	1247.29	6652.48	1123.58	897.481	8391.05	6161.31	9100.29	9315.71	4100.13	5649.49	5465.3	1370.06	8432.05	5062.51	8508.73	7909.82	6626.32	7659.69	1013.59	7114.84	6985.63	4171.29	10443.6	10793	6588.33	7675.72	4283.78	6749.44	8840.27	7643.39	7713.79	2350.34	7505.68	5156.3	2982.14	3771.58	8913.76	5823.09	8221.5	4830.8	8922.75	8240.99
2H-IS__PC_2[M+OAC]1-	847.779	7.40317	0	3001.3	1901.62	1602.21	2042.32	2423.72	2820.29	1230.21	630.264	3688.21	2007.84	1570.4	2132.73	2126.28	2449.09	1357.26	727.257	3702.1	1950.1	2800.07	2376.51	2701.52	1970.48	268.517	1786.59	3435.07	1772.84	2318.28	2287.96	2060.77	2729.66	1261.96	2314.83	3407.14	1883.44	2930.85	752.941	2536.15	2384.84	833.594	645.485	3234.73	1792.64	3228.44	2125.1	2134.64	2165.72
2H-IS__PC_3[M+Cl-]1-	824.741	7.7388	0	12717.4	14389.8	16336.3	15281.6	1966.26	11154.5	1870.07	1513.23	13913.7	10390.6	15157.2	15355.5	6762.44	9641.52	9022.53	2306.32	13997.5	8442.44	14778.9	13352.7	11197.7	12548.7	1732.23	11896.6	11466.9	6526.8	17238.8	17520.5	11226.3	12935.8	7141.16	11063.2	14764	12738.4	12832.8	4055.66	12412.7	8651.91	4816.05	6133.63	15081.6	9401.31	14042.4	8261.71	14799.6	13914.6
2H-IS__PC_3[M+OAC]1-	848.784	6.12052	0	5097.64	3144.11	2814.59	3407.18	4044.19	4741.88	2053.77	1087.08	6008.57	3301.38	2705.88	3521.52	3549.01	3939.93	2282.23	1207.34	6083.51	3246.74	4805.12	3908.53	4511.27	3184.62	465.679	2996.21	5656.59	2894.74	3900.08	3686.22	3372.63	4625.05	2328.71	3817.26	5529.16	3201.41	4936.43	1235.1	4289.84	4040.48	1400.13	1076.59	5397.5	3072.19	5238.07	3468.92	3454.23	3635.28
2H-IS__PC_4[M+Cl-]1-	825.745	6.88469	0	9014.08	10086.8	11381.5	11008.3	1438.56	8159.05	1309.21	1001.7	9874.49	7180.26	10615.1	10872.5	4788.08	6850.28	6247.04	1643.91	9726.37	5896.47	10265.9	9207.54	7884.82	8664.46	1171.38	8153.12	8033.41	4676.64	12094.6	12669.9	7854.43	8897.02	4842.22	7617.93	10182.9	8731.63	8896.06	2948.16	8641.95	6051.11	3385.92	4387.84	10265.7	6627.15	9960.62	5928.06	10456.4	9666.22
2H-IS__PC_4[M+OAC]1-	849.789	6.87082	0	3406.91	2170.71	1952.56	2345.1	2904.6	3231.75	1351.2	758.727	4048.03	2113.13	1804.26	2405.82	2420.83	2751	1480.14	713.964	4162.18	2292	3187.29	2682.49	3146.12	2186.83	289.38	2091.15	3991.51	2109.02	2703.76	2595.81	2326.02	3226.44	1588.76	2560.88	3863.23	2183.5	3462.35	867.965	2857.05	2696.44	1017.62	756.474	3658.58	2099.88	3674.57	2447.21	2404.08	2513.15
2H-IS__PC_5[M+Cl-]1-	826.74	10.2163	0	3937.26	4378.23	4882.6	4667.27	626.656	3488.32	546.689	464.789	4174.54	3125.05	4622.52	4559.94	2031.35	2827.62	2698.72	727.391	4173.28	2526.8	4400.93	3977.1	3338.57	3724.44	539.122	3612.42	3592.23	2000.65	5261.77	5395.58	3384.93	3956.6	2112.45	3333.74	4283.17	3865.17	3876.05	1212.84	3814.68	2668.85	1455.61	1874.47	4406.77	2812.2	4150.45	2407.32	4510.38	4084.17
2H-IS__PC_5[M+OAC]1-	850.792	4.25192	0	1282.89	797.349	695.985	861.618	1027.4	1138.36	491.278	212.355	1501.79	793.498	637.844	810.569	874.417	1023.21	607.058	250.743	1515.91	759.856	1175.65	1027.49	1126.34	808.733	51.5309	709.069	1398.72	746.029	971.439	910.127	821.563	1098.68	504.415	951.196	1413.37	750.995	1208.85	277.605	1030.41	984.727	334.438	149.666	1287.5	720.764	1276.5	852.607	807.318	860.629
2H-IS__PC_6[M+Cl-]1-	827.743	7.8708	0	2579.96	2863.02	3270.6	3076.58	276.915	2206.41	309.747	268.687	2730.83	2037.35	3027.59	2987.81	1322.36	1860.18	1717.27	449.173	2714.51	1573.99	2890.03	2592.73	2198.9	2398.5	332.355	2362.41	2290.75	1248.23	3336.21	3485.68	2081.85	2597.08	1443	2088.32	2850.44	2439.55	2503.68	724.365	2509.77	1690.03	880.087	1169.99	2898.02	1792.78	2618.84	1608.44	2799.94	2648.91
2H-IS__PC_7[M+Cl-]1-	828.746	7.75268	0	899.736	1024.45	1126.73	1049.36	80.1275	696.564	63.729	75.1055	975.811	740.161	1025.48	1078.81	439.378	635.012	622.73	117.226	987.303	517.956	964.507	912.237	826.006	862.452	54.981	812.867	768.34	426.727	1282.76	1290.4	819.089	837.197	461.03	750.569	997.255	946.907	874.705	233.443	842.619	588.34	309.513	343.081	990.202	670.254	963.458	577.165	1029.83	963.443
2H-IS__PC_U	772.736	6.33302	0	2191.06	2064.68	2109.37	2071.81	1036.78	1703.5	689.836	272.754	2442.92	1774.32	1970.9	2136.51	1328.69	1427.57	954.02	346.7	2018.81	1389.13	1751.84	1637.49	1601.1	1301.14	281.193	945.69	1790.39	1374.24	1873.26	1800.57	1258.55	1574.49	1003.81	1081.57	1747.17	1649.24	1615.45	715.37	1423.53	1238.04	809.591	436.7	1873.76	1383.97	1870.5	1268.96	1665.32	1447.52
2H-IS__PC_U	773.741	6.12285	0	10347.4	9888.8	9728.53	9853.22	4791.4	7929.92	3234.29	1311.18	11782	8299.65	9250.84	10099.5	6045.45	6749.03	4778.74	1742.07	9634.31	6601.15	8097.96	7541.05	6992.71	5990.31	1369.06	4738.3	8080.23	6191.22	8863.34	8620.51	5953.8	7443.01	4578.71	4981.97	8435.93	7696.01	7535.38	3339.5	6578.63	6005.54	3738.34	2397.31	8980.36	6826.45	8717.29	6152.68	7863.04	6606.14
2H-IS__PC_U	774.747	7.5202	0	16096.3	15563.7	14967.7	15580.3	7423.68	12510.5	4996.99	2049.86	17744.8	13188	14446.4	15870.8	9565.53	10322.4	7279.39	2698.09	15465.8	10512.4	12905.8	11612.1	10886.8	9472.63	2301.05	7206.17	12874.3	9960.86	13856.7	13725.5	9310.6	11447.5	7094.79	7742.69	13276.4	12205.6	11828.7	5209.75	10239.9	9333.67	5978.89	3477.94	13874.3	11120.7	13448.8	9415.05	12030.2	10236
2H-IS__PC_U	775.752	6.82563	0	10626.7	10123	9862.29	10147.4	4636.87	8024.88	3301.84	1317.68	11795.2	8511.71	9480.02	10270.8	6205.91	6548.68	4806.89	1807.8	9943.4	7013.58	8577.98	7608.63	7050.33	6172.84	1450.42	4718.06	8513.86	6426.53	8975.18	8823.2	6039.49	7527.86	4719.35	5099.11	8872.74	7832.41	7800.22	3365.92	6728.93	6184.83	3815.73	2332.15	8989.61	7307.07	8746.63	6097.91	7867.59	6616.88
2H-IS__PC_U	776.757	6.91014	0	3478.4	3495.98	3328.98	3288.15	1619.04	2660.83	1107.28	425.088	4053.43	2869.8	3065.48	3429.32	2036.5	2248.39	1655.22	601.607	3360.36	2321.39	2795.79	2539.87	2441.08	2086.56	463.936	1524.25	2808.44	2153.01	2974.51	3005.31	1946.05	2510.33	1556.36	1654.57	2942.78	2636.04	2452.54	1099.11	2289.22	2078.26	1220.76	751.486	3005.68	2433.61	2956.63	2119.03	2641.08	2248.58
2H-IS__PC_U	777.761	8.80573	0	2368.14	2454.18	2491.63	2472.14	2845.29	3706.85	2781.36	764.83	2867.1	2299.77	2237.5	2310.21	2591.7	3620.99	3049.08	1788.91	2854.79	3048.07	3271.01	3102.3	3151.88	3103.31	1694.39	3788.14	2863.37	2729.24	2991.54	2716.66	3098.7	3294.93	2696.15	3681.62	2882.97	2979.21	3203.39	1690.63	3106.71	3005.42	2741.71	1989.03	2838.82	2934.55	3267.99	3173.89	2941.66	3381.51
2H-IS__PC_U1[	772.736	6.33302	0	2191.06	2064.68	2109.37	2071.81	1036.78	1703.5	689.836	272.754	2442.92	1774.32	1970.9	2136.51	1328.69	1427.57	954.02	346.7	2018.81	1389.13	1751.84	1637.49	1601.1	1301.14	281.193	945.69	1790.39	1374.24	1873.26	1800.57	1258.55	1574.49	1003.81	1081.57	1747.17	1649.24	1615.45	715.37	1423.53	1238.04	809.591	436.7	1873.76	1383.97	1870.5	1268.96	1665.32	1447.52
2H-IS__PC_U2[	773.741	6.12285	0	10347.4	9888.8	9728.53	9853.22	4791.4	7929.92	3234.29	1311.18	11782	8299.65	9250.84	10099.5	6045.45	6749.03	4778.74	1742.07	9634.31	6601.15	8097.96	7541.05	6992.71	5990.31	1369.06	4738.3	8080.23	6191.22	8863.34	8620.51	5953.8	7443.01	4578.71	4981.97	8435.93	7696.01	7535.38	3339.5	6578.63	6005.54	3738.34	2397.31	8980.36	6826.45	8717.29	6152.68	7863.04	6606.14
2H-IS__PC_U3[	774.747	7.5202	0	16096.3	15563.7	14967.7	15580.3	7423.68	12510.5	4996.99	2049.86	17744.8	13188	14446.4	15870.8	9565.53	10322.4	7279.39	2698.09	15465.8	10512.4	12905.8	11612.1	10886.8	9472.63	2301.05	7206.17	12874.3	9960.86	13856.7	13725.5	9310.6	11447.5	7094.79	7742.69	13276.4	12205.6	11828.7	5209.75	10239.9	9333.67	5978.89	3477.94	13874.3	11120.7	13448.8	9415.05	12030.2	10236
2H-IS__PC_U4[	775.752	6.82563	0	10626.7	10123	9862.29	10147.4	4636.87	8024.88	3301.84	1317.68	11795.2	8511.71	9480.02	10270.8	6205.91	6548.68	4806.89	1807.8	9943.4	7013.58	8577.98	7608.63	7050.33	6172.84	1450.42	4718.06	8513.86	6426.53	8975.18	8823.2	6039.49	7527.86	4719.35	5099.11	8872.74	7832.41	7800.22	3365.92	6728.93	6184.83	3815.73	2332.15	8989.61	7307.07	8746.63	6097.91	7867.59	6616.88
2H-IS__PC_U5[	776.757	6.91014	0	3478.4	3495.98	3328.98	3288.15	1619.04	2660.83	1107.28	425.088	4053.43	2869.8	3065.48	3429.32	2036.5	2248.39	1655.22	601.607	3360.36	2321.39	2795.79	2539.87	2441.08	2086.56	463.936	1524.25	2808.44	2153.01	2974.51	3005.31	1946.05	2510.33	1556.36	1654.57	2942.78	2636.04	2452.54	1099.11	2289.22	2078.26	1220.76	751.486	3005.68	2433.61	2956.63	2119.03	2641.08	2248.58
2H-IS__PC_U6[	777.761	8.80573	0	2368.14	2454.18	2491.63	2472.14	2845.29	3706.85	2781.36	764.83	2867.1	2299.77	2237.5	2310.21	2591.7	3620.99	3049.08	1788.91	2854.79	3048.07	3271.01	3102.3	3151.88	3103.31	1694.39	3788.14	2863.37	2729.24	2991.54	2716.66	3098.7	3294.93	2696.15	3681.62	2882.97	2979.21	3203.39	1690.63	3106.71	3005.42	2741.71	1989.03	2838.82	2934.55	3267.99	3173.89	2941.66	3381.51
2H-IS__PE_[M-H]1-	744.703	6.66309	0	5941.21	5429.33	5843.66	5906.29	3456	5910.18	2727.52	1083.88	6575.19	4659.84	5548.57	5634.8	4053.02	5405	4586.22	1862.25	6614.75	4618.47	6250.98	5693.7	5469.23	5278.78	1564.01	5175.03	5725.26	4296.1	6591.86	6603.29	5076.96	5864.76	3789.43	5303.5	6392.94	5502.91	5965.9	2304.93	5723.69	4688.83	3201.92	2973.78	6205.11	4674.77	6583.1	4669.44	5804.55	5770.07
2H-IS__PE_[M-H]1-	745.709	5.68824	0	29886.3	27464.4	29274.7	29737	17166.6	29680.7	13461	5532.67	33706.6	23352	27514.6	28865.4	20575.6	27701.7	22914.1	9267.16	33012.2	23081	32570.8	29100.9	27324.6	25986.4	7622.45	25812.7	28843.2	20787.1	33448	32796.8	25857.4	29954.9	19320.8	27057	32488.3	27060.6	30642.1	11792.5	28768.9	23365	15984.8	15030.9	31934.9	23842.3	32364.1	24139.2	29764.4	28930.9
2H-IS__PE_[M-H]1-	746.715	4.98852	0	52172.1	48709.1	50710.7	51955.1	28735	50927.9	22850.5	9442.47	57944	40551.2	47779.1	50499.8	34643.7	47086.5	39381	16088.2	57797.8	40358.4	56620.6	50711.3	47708.2	45193.4	13066.3	45164.8	50117.3	36105.2	57869	57010.3	43355.5	52097.9	32476.5	47091.2	56008.7	47836.3	52834.7	20245.5	49688.7	40409.7	27936	25315	56893.8	41584.7	57044.3	41113.4	51555.5	51029.4
2H-IS__PE_[M-H]1-	747.72	3.2961	0	33005.9	30793	32377.2	32768.4	18803.8	32635.6	14717.2	5929.02	37365.2	25647	30549.1	32409.3	22011.8	29777.7	24804.7	10259.7	36270.9	25610.4	36359.1	32451.5	30275.3	29098.8	7997.4	28778.3	31989.4	22884.7	37177.4	36863	28065	33199	20651.2	29574	35538.1	30794.8	33769.1	12927.9	31986.6	25697.7	17208.3	16259.2	35822.5	26595.9	36977.4	26659.2	33116	32360.6
2H-IS__PE_[M-H]1-	748.723	4.54276	0	10312.8	9681.04	10012.7	10263.1	5921.87	10082.2	4786.7	1908.44	11505	8172.35	9461.86	9789.59	7010.66	9037.71	7816.68	3170.28	11537.1	8251.28	11292	10124.2	9329.49	8946.98	2661.63	9156.04	10017.4	7347.12	11228.8	11241.8	8701.98	10222.5	6619.63	9204.52	10804.3	9743.34	10407.5	4160.62	9718.46	8131.8	5688.05	5195.42	11490.7	8362.32	11367.1	8139.77	10402.9	10014
2H-IS__PE_[M-H]1-	749.727	4.33158	0	2483.73	2260.27	2363.32	2354.26	1369.94	2306.14	924.338	437.026	2710.89	1884.93	2228.36	2372.83	1641.47	2022.3	1852.1	704.01	2582.85	1836.31	2492.04	2295.39	2219.49	1911.21	552.724	1998.86	2317.56	1576.6	2548.96	2532.02	1951.79	2430.04	1469.45	2043.65	2627.7	2298.23	2402.9	891.985	2241.95	1674.86	1131.67	983.196	2539.92	1841.78	2628.39	1905.11	2216.49	2294.25
2H-IS__PE_1[M-H]1-	744.703	6.66309	0	5941.21	5429.33	5843.66	5906.29	3456	5910.18	2727.52	1083.88	6575.19	4659.84	5548.57	5634.8	4053.02	5405	4586.22	1862.25	6614.75	4618.47	6250.98	5693.7	5469.23	5278.78	1564.01	5175.03	5725.26	4296.1	6591.86	6603.29	5076.96	5864.76	3789.43	5303.5	6392.94	5502.91	5965.9	2304.93	5723.69	4688.83	3201.92	2973.78	6205.11	4674.77	6583.1	4669.44	5804.55	5770.07
2H-IS__PE_2[M-H]1-	745.709	5.68824	0	29886.3	27464.4	29274.7	29737	17166.6	29680.7	13461	5532.67	33706.6	23352	27514.6	28865.4	20575.6	27701.7	22914.1	9267.16	33012.2	23081	32570.8	29100.9	27324.6	25986.4	7622.45	25812.7	28843.2	20787.1	33448	32796.8	25857.4	29954.9	19320.8	27057	32488.3	27060.6	30642.1	11792.5	28768.9	23365	15984.8	15030.9	31934.9	23842.3	32364.1	24139.2	29764.4	28930.9
2H-IS__PE_3[M-H]1-	746.715	4.98852	0	52172.1	48709.1	50710.7	51955.1	28735	50927.9	22850.5	9442.47	57944	40551.2	47779.1	50499.8	34643.7	47086.5	39381	16088.2	57797.8	40358.4	56620.6	50711.3	47708.2	45193.4	13066.3	45164.8	50117.3	36105.2	57869	57010.3	43355.5	52097.9	32476.5	47091.2	56008.7	47836.3	52834.7	20245.5	49688.7	40409.7	27936	25315	56893.8	41584.7	57044.3	41113.4	51555.5	51029.4
2H-IS__PE_4[M-H]1-	747.72	3.2961	0	33005.9	30793	32377.2	32768.4	18803.8	32635.6	14717.2	5929.02	37365.2	25647	30549.1	32409.3	22011.8	29777.7	24804.7	10259.7	36270.9	25610.4	36359.1	32451.5	30275.3	29098.8	7997.4	28778.3	31989.4	22884.7	37177.4	36863	28065	33199	20651.2	29574	35538.1	30794.8	33769.1	12927.9	31986.6	25697.7	17208.3	16259.2	35822.5	26595.9	36977.4	26659.2	33116	32360.6
2H-IS__PE_5[M-H]1-	748.723	4.54276	0	10312.8	9681.04	10012.7	10263.1	5921.87	10082.2	4786.7	1908.44	11505	8172.35	9461.86	9789.59	7010.66	9037.71	7816.68	3170.28	11537.1	8251.28	11292	10124.2	9329.49	8946.98	2661.63	9156.04	10017.4	7347.12	11228.8	11241.8	8701.98	10222.5	6619.63	9204.52	10804.3	9743.34	10407.5	4160.62	9718.46	8131.8	5688.05	5195.42	11490.7	8362.32	11367.1	8139.77	10402.9	10014
2H-IS__PE_6[M-H]1-	749.727	4.33158	0	2483.73	2260.27	2363.32	2354.26	1369.94	2306.14	924.338	437.026	2710.89	1884.93	2228.36	2372.83	1641.47	2022.3	1852.1	704.01	2582.85	1836.31	2492.04	2295.39	2219.49	1911.21	552.724	1998.86	2317.56	1576.6	2548.96	2532.02	1951.79	2430.04	1469.45	2043.65	2627.7	2298.23	2402.9	891.985	2241.95	1674.86	1131.67	983.196	2539.92	1841.78	2628.39	1905.11	2216.49	2294.25
2H-IS__PG_[M-H]1-	774.691	5.82813	0	1098.79	957.756	1080.18	1118.06	820.157	1110.03	589.48	231.066	1190.23	938.327	1006.37	1063.77	878.656	1082.26	942.634	371.424	1172.72	938.563	1123.84	1040.55	1050.06	988.068	329.128	943.26	1055.42	851.878	1159.37	1152.42	898.21	1114.5	737.607	1036.97	1151.83	969.374	1115.02	453.257	1030.51	871.124	692.825	651.844	1166.92	854.693	1145.31	901.818	1129.18	1075.96
2H-IS__PG_[M-H]1-	775.697	5.73516	0	7626.71	7071.07	7427.54	7754.35	5614.16	8024.36	4376.97	1860.74	8739.77	6611.93	7290.21	7547.93	5934.9	7774.7	6730.51	2801.78	8270.72	6382.04	8077.32	7472.06	7445.81	6931.18	2402.7	6933.59	7464.67	6015.08	8241.58	8602.7	6635.97	7745.22	5277.32	7587.66	7843.73	7116.56	7603.8	3280.21	7327.56	6334.52	4990.25	4535.28	8185.12	6284.17	8345.52	6325.62	7702.14	7758.37
2H-IS__PG_[M-H]1-	776.703	3.31691	0	34370.3	31458	34460.5	36157.3	25708.9	36589.3	18932.4	8264.68	39557.4	29831.1	32470	35099.5	27009.1	35536.8	30575.2	12505	37118.3	28172.3	36998.3	33431.7	33657.4	31590.4	10757.1	31336.3	33157.7	26238.9	37859.4	38914.9	29603.8	34648.4	23595.9	34384.6	35771	31482	34556.4	14508	33006.2	28331.8	22495.4	20495.3	36185.7	28679.1	37574.8	28559.8	35251.3	34805.7
2H-IS__PG_[M-H]1-	777.708	2.51219	0	59855.1	54484.9	60454.3	63326.2	45734.3	63820.3	32962.4	13838.9	69658	51595.7	57420.6	61153.9	46893.8	62650.7	52675.7	21588.4	64752.8	48153.8	64650.7	58758.9	59267.4	54740.5	18344.5	54557.4	57541.2	45515.2	65771.3	68246.3	51436.5	59663.3	40367.1	59446.4	62219.5	54528.5	60386.1	24702.9	57865.7	49546.6	38344.3	35301	63626.4	49432.9	65403.9	50567	62132.5	60589.2
2H-IS__PG_[M-H]1-	778.713	3.02903	0	43042.7	39708.2	43309.1	45090.2	31612.6	45702.2	23414.9	10158.4	50219.2	37064.8	41112.2	43811.6	33130.4	44732.8	37500	15686.4	46523.7	34768.9	46975.3	42092.8	42124	39805.7	13115.5	39096.5	41553.8	33269.8	47368.6	48788.3	36607.5	42916.9	29354	43021.2	45178.4	39638.6	43716.5	17811	41419.5	35893.3	28058.2	25098.7	46199	35926.7	47097.7	35679.4	44591.7	43533.1
2H-IS__PG_[M-H]1-	779.717	3.94053	0	14041.7	12950.7	13682.8	14419.4	10191.8	14715.8	7871.66	3391.74	16238.2	12160.5	13200.7	14136.4	11097.3	14321.4	12412.9	4968.76	15200.3	11614.5	14986.3	13447.6	13430.9	12714.5	4496.68	12473.8	13426.7	10882.9	15027.2	15654.6	11845.1	14019.7	9614.68	13767.9	14290.9	12954.9	13833.4	5972.04	13372.9	11466.6	9367.66	8315.22	14828.3	11738.3	15244.6	11711.4	14424	14038.6
2H-IS__PG_[M-H]1-	780.721	2.26233	0	3085.56	2865.82	3147.19	3108.66	2291.06	3320.06	1697.96	793.722	3574.28	2718.03	2949.16	3185.04	2424.99	3260.83	2812.81	1147.75	3280.44	2473.35	3259.78	2998.96	3064.64	2898.38	1007.4	2861.34	3027.44	2345.19	3423.65	3401.25	2589.19	3164.62	2164.23	3098.63	3206.87	2768.83	3112.85	1289.8	3001.79	2644.81	2013.56	1816.53	3342.29	2554.78	3263.99	2637.14	3349.59	3141.76
2H-IS__PG_1[M-H]1-	774.691	5.82813	0	1098.79	957.756	1080.18	1118.06	820.157	1110.03	589.48	231.066	1190.23	938.327	1006.37	1063.77	878.656	1082.26	942.634	371.424	1172.72	938.563	1123.84	1040.55	1050.06	988.068	329.128	943.26	1055.42	851.878	1159.37	1152.42	898.21	1114.5	737.607	1036.97	1151.83	969.374	1115.02	453.257	1030.51	871.124	692.825	651.844	1166.92	854.693	1145.31	901.818	1129.18	1075.96
2H-IS__PG_2[M-H]1-	775.697	5.73516	0	7626.71	7071.07	7427.54	7754.35	5614.16	8024.36	4376.97	1860.74	8739.77	6611.93	7290.21	7547.93	5934.9	7774.7	6730.51	2801.78	8270.72	6382.04	8077.32	7472.06	7445.81	6931.18	2402.7	6933.59	7464.67	6015.08	8241.58	8602.7	6635.97	7745.22	5277.32	7587.66	7843.73	7116.56	7603.8	3280.21	7327.56	6334.52	4990.25	4535.28	8185.12	6284.17	8345.52	6325.62	7702.14	7758.37
2H-IS__PG_3[M-H]1-	776.703	3.31691	0	34370.3	31458	34460.5	36157.3	25708.9	36589.3	18932.4	8264.68	39557.4	29831.1	32470	35099.5	27009.1	35536.8	30575.2	12505	37118.3	28172.3	36998.3	33431.7	33657.4	31590.4	10757.1	31336.3	33157.7	26238.9	37859.4	38914.9	29603.8	34648.4	23595.9	34384.6	35771	31482	34556.4	14508	33006.2	28331.8	22495.4	20495.3	36185.7	28679.1	37574.8	28559.8	35251.3	34805.7
2H-IS__PG_4[M-H]1-	777.708	2.51219	0	59855.1	54484.9	60454.3	63326.2	45734.3	63820.3	32962.4	13838.9	69658	51595.7	57420.6	61153.9	46893.8	62650.7	52675.7	21588.4	64752.8	48153.8	64650.7	58758.9	59267.4	54740.5	18344.5	54557.4	57541.2	45515.2	65771.3	68246.3	51436.5	59663.3	40367.1	59446.4	62219.5	54528.5	60386.1	24702.9	57865.7	49546.6	38344.3	35301	63626.4	49432.9	65403.9	50567	62132.5	60589.2
2H-IS__PG_5[M-H]1-	778.713	3.02903	0	43042.7	39708.2	43309.1	45090.2	31612.6	45702.2	23414.9	10158.4	50219.2	37064.8	41112.2	43811.6	33130.4	44732.8	37500	15686.4	46523.7	34768.9	46975.3	42092.8	42124	39805.7	13115.5	39096.5	41553.8	33269.8	47368.6	48788.3	36607.5	42916.9	29354	43021.2	45178.4	39638.6	43716.5	17811	41419.5	35893.3	28058.2	25098.7	46199	35926.7	47097.7	35679.4	44591.7	43533.1
2H-IS__PG_6[M-H]1-	779.717	3.94053	0	14041.7	12950.7	13682.8	14419.4	10191.8	14715.8	7871.66	3391.74	16238.2	12160.5	13200.7	14136.4	11097.3	14321.4	12412.9	4968.76	15200.3	11614.5	14986.3	13447.6	13430.9	12714.5	4496.68	12473.8	13426.7	10882.9	15027.2	15654.6	11845.1	14019.7	9614.68	13767.9	14290.9	12954.9	13833.4	5972.04	13372.9	11466.6	9367.66	8315.22	14828.3	11738.3	15244.6	11711.4	14424	14038.6
2H-IS__PG_7[M-H]1-	780.721	2.26233	0	3085.56	2865.82	3147.19	3108.66	2291.06	3320.06	1697.96	793.722	3574.28	2718.03	2949.16	3185.04	2424.99	3260.83	2812.81	1147.75	3280.44	2473.35	3259.78	2998.96	3064.64	2898.38	1007.4	2861.34	3027.44	2345.19	3423.65	3401.25	2589.19	3164.62	2164.23	3098.63	3206.87	2768.83	3112.85	1289.8	3001.79	2644.81	2013.56	1816.53	3342.29	2554.78	3263.99	2637.14	3349.59	3141.76
2H-IS__PI_[M-H]1-	862.707	7.40257	0.0125	19.5477	12.1965	13.087	0	40.2237	36.096	19.7832	2.16878	44.5455	23.6131	24.1919	25.7456	12.8559	19.275	43.2172	15.1176	23.6965	25.9413	96.9145	31.1199	32.7057	27.437	14.9714	33.9442	67.5986	28.6859	17.7614	9.69276	17.272	51.6528	15.7133	30.6549	32.4102	29.4248	42.483	20.4659	44.2723	19.6746	22.727	13.0385	18.21	42.2717	77.1356	28.4538	32.1525	31.4879
2H-IS__PI_[M-H]1-	863.713	5.03495	0	530.356	439.724	451.135	541.654	393.865	503.035	263.107	99.4528	568.85	341.052	411.799	503.86	392.535	454.598	379.079	146.454	429.156	275.678	377.946	319.096	341.623	304.03	64.8293	325.967	373.422	327.574	396.431	366.769	314.9	329.927	245.697	352.05	402.778	407.107	369.005	115.502	289.726	232.396	238.292	72.8879	419.225	314.564	411.406	305.264	360.282	340.69
2H-IS__PI_[M-H]1-	864.719	3.31177	0	2383.7	2104.09	2254.01	2401.81	1805.29	2344.39	1383.11	562.183	2632.17	1977.71	2211.58	2475	1796.07	2141.72	1873.51	880.309	1886.42	1493.59	1949.92	1714.69	1698.76	1462.8	509.542	1643.98	1835.37	1477.84	1844.54	1989.05	1536.13	1753.35	1224.11	1605.05	1824.98	1764.06	1771.5	747.385	1691.45	1440.96	1231.77	969.803	1899.9	1604.89	2049.12	1561.16	1981.92	1768.46
2H-IS__PI_[M-H]1-	865.724	3.66601	0	3926.31	3630.88	3717.71	4151.84	3097.83	3896.89	2180.64	1003.08	4409.1	3407.19	3754.65	4004.78	3110.78	3848.92	3261.22	1418.85	3401.29	2609.62	3230.27	2951.98	2902.86	2613.64	941.029	2903.12	3141.76	2565.25	3020.89	3348.31	2626.93	3062.08	2094.13	2867.82	3105.21	3124.42	3065.84	1351.05	2909	2538	2243.85	1626.67	3321	2755.11	3519.59	2639.19	3348.46	2936.37
2H-IS__PI_[M-H]1-	866.73	2.12292	0	2903.73	2766.26	2938.47	3040	2360.05	3056.81	1744.12	697.472	3277.1	2691.66	2920.74	3052.43	2459.59	2892.99	2495.35	1131.63	2564.81	1951.24	2519.18	2177.47	2231.81	1962.13	674.048	2169.85	2405.61	1885.57	2318.84	2589.51	2017.36	2377.45	1598.25	2218.07	2436.04	2331.93	2367.29	1010.33	2225.96	1867.26	1685.82	1330.83	2558.2	2035.28	2713.92	2044.1	2651.39	2327.69
2H-IS__PI_[M-H]1-	867.733	3.84479	0	1106.22	1023.58	1033.42	1095.64	824.723	1125.23	594.815	244.841	1172.51	952.072	1009.54	1080.22	851.644	1088.27	930.979	367.528	910.417	801.047	921.746	792.632	776.576	721.762	224.293	802.629	817.248	714.051	793.486	901.479	718.969	883.438	565.176	849.916	841.862	842.464	838.702	342.653	849.895	708.309	556.903	439.033	918.513	779.751	1032.04	745.056	911.902	817.764
2H-IS__PI_[M-H]1-	868.736	3.1575	0.0125	142.014	184.986	136.322	170.155	100.97	136.745	63.9868	24.2116	215.36	118.787	145.322	101.646	118.057	203.214	159.287	69.1147	154.501	75.5419	107.013	81.0793	83.2509	82.9992	12.2167	129.034	188.15	105.8	104.447	70.2866	98.1532	81.3958	72.5893	135.863	120.861	102.244	96.4451	28.1487	110.826	46.7263	88.7072	0	108.643	103.202	126.544	82.8956	107.46	74.1897
2H-IS__PI_[M-H]1-	869.74	5.66368	0.7125	0	0	0	12.5553	0	0	0	4.26854	0	4.88159	0	0	5.7707	5.82553	0	0	5.23019	0	0	0	0	0	0	8.71653	0	6.89015	0	0	0	0	0	0	4.93197	0	0	4.79346	7.25706	0	0	0	0	0	0	0	0	10.3002
2H-IS__PI_1[M-H]1-	862.707	7.40257	0.0125	19.5477	12.1965	13.087	0	40.2237	36.096	19.7832	2.16878	44.5455	23.6131	24.1919	25.7456	12.8559	19.275	43.2172	15.1176	23.6965	25.9413	96.9145	31.1199	32.7057	27.437	14.9714	33.9442	67.5986	28.6859	17.7614	9.69276	17.272	51.6528	15.7133	30.6549	32.4102	29.4248	42.483	20.4659	44.2723	19.6746	22.727	13.0385	18.21	42.2717	77.1356	28.4538	32.1525	31.4879
2H-IS__PI_2[M-H]1-	863.713	5.03495	0	530.356	439.724	451.135	541.654	393.865	503.035	263.107	99.4528	568.85	341.052	411.799	503.86	392.535	454.598	379.079	146.454	429.156	275.678	377.946	319.096	341.623	304.03	64.8293	325.967	373.422	327.574	396.431	366.769	314.9	329.927	245.697	352.05	402.778	407.107	369.005	115.502	289.726	232.396	238.292	72.8879	419.225	314.564	411.406	305.264	360.282	340.69
2H-IS__PI_3[M-H]1-	864.719	3.31177	0	2383.7	2104.09	2254.01	2401.81	1805.29	2344.39	1383.11	562.183	2632.17	1977.71	2211.58	2475	1796.07	2141.72	1873.51	880.309	1886.42	1493.59	1949.92	1714.69	1698.76	1462.8	509.542	1643.98	1835.37	1477.84	1844.54	1989.05	1536.13	1753.35	1224.11	1605.05	1824.98	1764.06	1771.5	747.385	1691.45	1440.96	1231.77	969.803	1899.9	1604.89	2049.12	1561.16	1981.92	1768.46
2H-IS__PI_4[M-H]1-	865.724	3.66601	0	3926.31	3630.88	3717.71	4151.84	3097.83	3896.89	2180.64	1003.08	4409.1	3407.19	3754.65	4004.78	3110.78	3848.92	3261.22	1418.85	3401.29	2609.62	3230.27	2951.98	2902.86	2613.64	941.029	2903.12	3141.76	2565.25	3020.89	3348.31	2626.93	3062.08	2094.13	2867.82	3105.21	3124.42	3065.84	1351.05	2909	2538	2243.85	1626.67	3321	2755.11	3519.59	2639.19	3348.46	2936.37
2H-IS__PI_5[M-H]1-	866.73	2.12292	0	2903.73	2766.26	2938.47	3040	2360.05	3056.81	1744.12	697.472	3277.1	2691.66	2920.74	3052.43	2459.59	2892.99	2495.35	1131.63	2564.81	1951.24	2519.18	2177.47	2231.81	1962.13	674.048	2169.85	2405.61	1885.57	2318.84	2589.51	2017.36	2377.45	1598.25	2218.07	2436.04	2331.93	2367.29	1010.33	2225.96	1867.26	1685.82	1330.83	2558.2	2035.28	2713.92	2044.1	2651.39	2327.69
2H-IS__PI_6[M-H]1-	867.733	3.84479	0	1106.22	1023.58	1033.42	1095.64	824.723	1125.23	594.815	244.841	1172.51	952.072	1009.54	1080.22	851.644	1088.27	930.979	367.528	910.417	801.047	921.746	792.632	776.576	721.762	224.293	802.629	817.248	714.051	793.486	901.479	718.969	883.438	565.176	849.916	841.862	842.464	838.702	342.653	849.895	708.309	556.903	439.033	918.513	779.751	1032.04	745.056	911.902	817.764
2H-IS__PI_7[M-H]1-	868.736	3.1575	0.0125	142.014	184.986	136.322	170.155	100.97	136.745	63.9868	24.2116	215.36	118.787	145.322	101.646	118.057	203.214	159.287	69.1147	154.501	75.5419	107.013	81.0793	83.2509	82.9992	12.2167	129.034	188.15	105.8	104.447	70.2866	98.1532	81.3958	72.5893	135.863	120.861	102.244	96.4451	28.1487	110.826	46.7263	88.7072	0	108.643	103.202	126.544	82.8956	107.46	74.1897
2H-IS__PI_8[M-H]1-	869.74	5.66368	0.7125	0	0	0	12.5553	0	0	0	4.26854	0	4.88159	0	0	5.7707	5.82553	0	0	5.23019	0	0	0	0	0	0	8.71653	0	6.89015	0	0	0	0	0	0	4.93197	0	0	4.79346	7.25706	0	0	0	0	0	0	0	0	10.3002
2H-IS__PS_[M-H]1-	726.74	9.19487	0	1214.74	1185.07	1317.53	1403.03	939.921	1435.54	794.541	310.042	1405.94	1082.77	1271.27	1444.47	1022.29	1234.89	1128.32	513.38	1289.3	981.808	1342.56	1211.17	1156.93	1065.42	363.982	1375.77	1194.91	916.99	1279.44	1330.65	1105.32	1217.67	819.469	1274.31	1201.21	1235.06	1285.39	469.779	1222.77	61.1199	822.375	911.436	1278.17	958.272	1350.76	1055.03	1304.9	1362.92
2H-IS__PS_[M-H]1-	727.746	8.18723	0	4014.66	3595.17	4131.67	4253.92	3053.64	4522.89	2452.32	967.566	4337.63	3376.84	3979.82	4082.1	3201.91	3788.48	3469.78	1530.12	3767.22	2962.82	4056.51	3690.85	3546.23	3438.29	1164.4	4074.6	3692.62	2927.48	3711.95	4216.42	3199.53	3872.77	2549.43	3800.21	3888.59	3579.77	3650.93	1502.87	3707.09	448.284	2580.06	2772.98	4065.59	2928.19	4065.77	3133.85	4015.5	3891.73
2H-IS__PS_[M-H]1-	728.752	4.52829	0	9826.36	9052.25	10173.1	10736.1	7852.15	11188.5	5823.53	2430.98	10811.6	8527.49	9942.7	10325.4	8195.09	9548.72	8732.58	3950.92	9538.22	7369.68	10132.2	9073.3	8659.08	8505.62	3045.29	10077.1	9171.39	7318.34	9404.03	10412.6	8383.83	9587.19	6583.08	9534.16	9229.07	8968.06	9377.41	3764.73	9451.71	1120.52	6414.53	6849.79	9895.49	7565.24	10308.7	8032.39	9912.53	9908.83
2H-IS__PS_[M-H]1-	729.758	6.82995	0	17961.5	16526.2	17952.4	19435.1	13658.9	20376.8	10991	4332.03	19731.1	15588.4	18156	18661.2	15060.5	17113.8	15697.4	7239.35	17413.6	13124.9	18554.6	16376.4	15824.4	15432.7	5579	18706.4	16752.3	13075	16863	18856.4	14976.4	17406.3	11904.3	17069	17223.3	16185.5	17131.3	6848.8	17051.6	2026.14	11684.8	12467.5	18663.6	13667.5	18916.6	14305.8	17960.6	17862.3
2H-IS__PS_[M-H]1-	730.764	5.24643	0	20396.5	18306.4	20378.1	21935.4	15598.7	23338.6	12078.7	4839.83	22534.7	17863.4	20108.9	21405.4	16632	19191.9	17654.9	8215	19782.6	15322.2	20538.8	18648.4	17927.1	17192.6	6386.08	20527.6	19220.7	14649.6	19080.9	21139.6	16838.9	19649.6	13282.3	19225.8	19396.3	18442.9	19305.7	7743.8	19052.5	2286.5	13247	13955	20783.4	15941.3	21283.5	16242.1	20807.1	20372.6
2H-IS__PS_[M-H]1-	731.77	7.39304	0	13944.1	12591.4	14302	15182.9	10859	16083.5	8313.88	3319.75	15453.7	12164	14057.3	14923	11675.6	13521.5	12289.8	5727.67	13658.5	10128.8	14396.5	12986.1	12516.1	12004.2	4174.07	14393.2	12893.6	9869.02	13154.3	14700.7	11793.7	13547.4	9062.41	13311.4	13323.2	12593.5	13299.5	5298.24	13251.9	1571.72	9130.53	9580.62	14059.5	10587	14959.5	11277.8	14217.1	13862.7
2H-IS__PS_[M-H]1-	732.775	4.762	0	5261.93	4822.79	5443.4	5811.96	4023.84	5957.82	3139.18	1253.67	5740.8	4456.93	5279.86	5518.28	4377.4	5206.65	4465.15	2099.32	5155.8	3952.08	5250.51	4770.09	4699.84	4372.7	1663.93	5384.31	4890.76	3818.45	4971.26	5535.31	4480.43	5151.82	3575.73	4973.75	5005.23	4845.51	5161.98	2063.32	5028.77	592.162	3411.17	3680.39	5290.58	4002.23	5716.93	4263.98	5237.89	5197
2H-IS__PS_[M-H]1-	733.779	4.6375	0	1349.39	1295.45	1320.05	1393.36	1025.19	1492.31	870.142	324.454	1432.82	1162.51	1322.84	1343.78	1098.42	1210.45	1171.76	518.701	1327.25	984.105	1383.3	1237.8	1187.11	1090.75	432.145	1423.14	1254.64	1024.8	1254.77	1348.17	1094.97	1322.28	873.955	1323.97	1324.51	1198.94	1234.38	467.051	1251.81	41.4014	893.232	922.013	1366.41	1059.34	1429.65	1048.39	1354.08	1273.73
2H-IS__PS_[M-H]1-	734.783	4.53535	0.0125	203.279	209.054	154.013	151.454	156.545	265.056	96.5574	8.86092	246.125	142.142	207.176	207.805	130.884	170.997	131.002	52.3367	216.415	145.668	202.263	221.413	182.122	140.319	12.4923	266.176	213.264	140.029	253.582	215.411	150.587	211.186	102.544	213.025	205.686	195.525	208.414	44.747	159.629	0	135.965	88.1285	199.636	147.576	219.466	140.47	249.106	201.929
2H-IS__PS_1[M-H]1-	726.74	9.19487	0	1214.74	1185.07	1317.53	1403.03	939.921	1435.54	794.541	310.042	1405.94	1082.77	1271.27	1444.47	1022.29	1234.89	1128.32	513.38	1289.3	981.808	1342.56	1211.17	1156.93	1065.42	363.982	1375.77	1194.91	916.99	1279.44	1330.65	1105.32	1217.67	819.469	1274.31	1201.21	1235.06	1285.39	469.779	1222.77	61.1199	822.375	911.436	1278.17	958.272	1350.76	1055.03	1304.9	1362.92
2H-IS__PS_2[M-H]1-	727.746	8.18723	0	4014.66	3595.17	4131.67	4253.92	3053.64	4522.89	2452.32	967.566	4337.63	3376.84	3979.82	4082.1	3201.91	3788.48	3469.78	1530.12	3767.22	2962.82	4056.51	3690.85	3546.23	3438.29	1164.4	4074.6	3692.62	2927.48	3711.95	4216.42	3199.53	3872.77	2549.43	3800.21	3888.59	3579.77	3650.93	1502.87	3707.09	448.284	2580.06	2772.98	4065.59	2928.19	4065.77	3133.85	4015.5	3891.73
2H-IS__PS_3[M-H]1-	728.752	4.52829	0	9826.36	9052.25	10173.1	10736.1	7852.15	11188.5	5823.53	2430.98	10811.6	8527.49	9942.7	10325.4	8195.09	9548.72	8732.58	3950.92	9538.22	7369.68	10132.2	9073.3	8659.08	8505.62	3045.29	10077.1	9171.39	7318.34	9404.03	10412.6	8383.83	9587.19	6583.08	9534.16	9229.07	8968.06	9377.41	3764.73	9451.71	1120.52	6414.53	6849.79	9895.49	7565.24	10308.7	8032.39	9912.53	9908.83
2H-IS__PS_4[M-H]1-	729.758	6.82995	0	17961.5	16526.2	17952.4	19435.1	13658.9	20376.8	10991	4332.03	19731.1	15588.4	18156	18661.2	15060.5	17113.8	15697.4	7239.35	17413.6	13124.9	18554.6	16376.4	15824.4	15432.7	5579	18706.4	16752.3	13075	16863	18856.4	14976.4	17406.3	11904.3	17069	17223.3	16185.5	17131.3	6848.8	17051.6	2026.14	11684.8	12467.5	18663.6	13667.5	18916.6	14305.8	17960.6	17862.3
2H-IS__PS_5[M-H]1-	730.764	5.24643	0	20396.5	18306.4	20378.1	21935.4	15598.7	23338.6	12078.7	4839.83	22534.7	17863.4	20108.9	21405.4	16632	19191.9	17654.9	8215	19782.6	15322.2	20538.8	18648.4	17927.1	17192.6	6386.08	20527.6	19220.7	14649.6	19080.9	21139.6	16838.9	19649.6	13282.3	19225.8	19396.3	18442.9	19305.7	7743.8	19052.5	2286.5	13247	13955	20783.4	15941.3	21283.5	16242.1	20807.1	20372.6
2H-IS__PS_6[M-H]1-	731.77	7.39304	0	13944.1	12591.4	14302	15182.9	10859	16083.5	8313.88	3319.75	15453.7	12164	14057.3	14923	11675.6	13521.5	12289.8	5727.67	13658.5	10128.8	14396.5	12986.1	12516.1	12004.2	4174.07	14393.2	12893.6	9869.02	13154.3	14700.7	11793.7	13547.4	9062.41	13311.4	13323.2	12593.5	13299.5	5298.24	13251.9	1571.72	9130.53	9580.62	14059.5	10587	14959.5	11277.8	14217.1	13862.7
2H-IS__PS_7[M-H]1-	732.775	4.762	0	5261.93	4822.79	5443.4	5811.96	4023.84	5957.82	3139.18	1253.67	5740.8	4456.93	5279.86	5518.28	4377.4	5206.65	4465.15	2099.32	5155.8	3952.08	5250.51	4770.09	4699.84	4372.7	1663.93	5384.31	4890.76	3818.45	4971.26	5535.31	4480.43	5151.82	3575.73	4973.75	5005.23	4845.51	5161.98	2063.32	5028.77	592.162	3411.17	3680.39	5290.58	4002.23	5716.93	4263.98	5237.89	5197
2H-IS__PS_8[M-H]1-	733.779	4.6375	0	1349.39	1295.45	1320.05	1393.36	1025.19	1492.31	870.142	324.454	1432.82	1162.51	1322.84	1343.78	1098.42	1210.45	1171.76	518.701	1327.25	984.105	1383.3	1237.8	1187.11	1090.75	432.145	1423.14	1254.64	1024.8	1254.77	1348.17	1094.97	1322.28	873.955	1323.97	1324.51	1198.94	1234.38	467.051	1251.81	41.4014	893.232	922.013	1366.41	1059.34	1429.65	1048.39	1354.08	1273.73
2H-IS__PS_9[M-H]1-	734.783	4.53535	0.0125	203.279	209.054	154.013	151.454	156.545	265.056	96.5574	8.86092	246.125	142.142	207.176	207.805	130.884	170.997	131.002	52.3367	216.415	145.668	202.263	221.413	182.122	140.319	12.4923	266.176	213.264	140.029	253.582	215.411	150.587	211.186	102.544	213.025	205.686	195.525	208.414	44.747	159.629	0	135.965	88.1285	199.636	147.576	219.466	140.47	249.106	201.929
2H-IS__SM_[M+OAC]1-	790.768	5.61703	0.0125	171.807	102.715	119.213	107.869	159.434	139.726	54.1895	18.4399	195.539	72.7086	60.8002	107.892	124.126	141.746	40.3166	54.6847	246.466	96.9458	156.512	130.995	155.436	120.879	0	125.23	217.564	86.3129	118.406	107.241	102.26	237.808	71.6923	165.508	214.749	104.516	182.795	32.9675	162.511	125.864	22.9116	11.1006	199.582	67.8085	189.048	135.369	102.607	161.291
2H-IS__SM_[M+OAC]1-	791.774	5.48136	0	1376.75	928.071	901.06	1012.36	1329.97	1544.93	592.903	323.76	1678.25	863.157	809.357	1042.71	1114.57	1325.09	740.326	425.073	1815.84	926.922	1490.98	1302.13	1558.54	1113.53	152.179	1102.39	1740.71	907.001	1298.72	1227.69	1187.56	1438.79	760.811	1473.71	1764.08	957.437	1577.23	432.912	1477.75	1384.01	457.603	461.93	1654.69	907.84	1652.47	1098.39	1117.23	1329.72
2H-IS__SM_[M+OAC]1-	792.78	5.02662	0	4711.95	3152.2	2889.47	3480.04	4250.07	5193.34	2254.52	1103.61	5846.16	3108.57	2789.63	3502.38	3550.56	4792.26	2654.94	1412.6	6328.14	3178.85	4929.14	4272.8	4913.36	3792.88	636.562	3913.74	5863.52	3055.51	4269.69	4204.09	3948.42	5157.23	2645.98	4966.25	6093.75	3281.77	5331.57	1353.5	4899.82	4537.93	1645.49	1568.79	5610.01	3195.68	5554.87	3840.94	3845.78	4443.94
2H-IS__SM_[M+OAC]1-	793.783	4.36517	0	1951.87	1300.76	1225.36	1517.58	1831.21	2204.47	880.171	447.132	2393.6	1287.75	1134.42	1498.09	1490.32	1981.19	1077.26	576.464	2525.68	1401.11	2078.83	1866.91	2070.91	1612.86	253.546	1622.83	2533.7	1267.83	1809.16	1673.88	1711.45	2038.76	1109.36	2028.58	2494.85	1391.63	2155.98	566.664	2030.26	1850.16	683.7	643.261	2248.44	1318.22	2343.91	1584.5	1610.28	1803.95
2H-IS__SM_[M+OAC]1-	794.786	5.54237	0	426.33	246.914	190.648	221.584	383.767	424.564	158.043	77.3155	526.475	250.679	178.992	293.075	281.203	405.303	141.279	99.3371	601.452	282.927	463.384	413.965	437.662	346.185	16.1864	327.398	557.71	264.794	380.858	377.492	351.658	463.984	217.794	420.552	543.97	254.078	487.48	90.2756	406.249	406.775	87.2638	63.0988	541.369	234.605	467.102	369.478	315.714	382.414
2H-IS__SM_[M+OAC]1-	795.789	6.09643	0.2375	9.28306	6.97677	0	5.25655	0	5.29493	2.50334	3.84808	13.8297	0	5.32819	0	0	8.54336	9.4404	4.80016	13.5407	4.05247	23.105	8.50431	20.6408	4.2297	0	5.52969	26.6541	9.16812	8.66729	0	0	14.7529	0	17.7595	32.9062	8.74012	9.51079	0	4.55175	11.5013	3.78774	0	17.641	0	24.3952	0	12.0702	6.61422
2H-IS__SM_1[M+OAC]1-	790.768	5.61703	0.0125	171.807	102.715	119.213	107.869	159.434	139.726	54.1895	18.4399	195.539	72.7086	60.8002	107.892	124.126	141.746	40.3166	54.6847	246.466	96.9458	156.512	130.995	155.436	120.879	0	125.23	217.564	86.3129	118.406	107.241	102.26	237.808	71.6923	165.508	214.749	104.516	182.795	32.9675	162.511	125.864	22.9116	11.1006	199.582	67.8085	189.048	135.369	102.607	161.291
2H-IS__SM_2[M+OAC]1-	791.774	5.48136	0	1376.75	928.071	901.06	1012.36	1329.97	1544.93	592.903	323.76	1678.25	863.157	809.357	1042.71	1114.57	1325.09	740.326	425.073	1815.84	926.922	1490.98	1302.13	1558.54	1113.53	152.179	1102.39	1740.71	907.001	1298.72	1227.69	1187.56	1438.79	760.811	1473.71	1764.08	957.437	1577.23	432.912	1477.75	1384.01	457.603	461.93	1654.69	907.84	1652.47	1098.39	1117.23	1329.72
2H-IS__SM_3[M+OAC]1-	792.78	5.02662	0	4711.95	3152.2	2889.47	3480.04	4250.07	5193.34	2254.52	1103.61	5846.16	3108.57	2789.63	3502.38	3550.56	4792.26	2654.94	1412.6	6328.14	3178.85	4929.14	4272.8	4913.36	3792.88	636.562	3913.74	5863.52	3055.51	4269.69	4204.09	3948.42	5157.23	2645.98	4966.25	6093.75	3281.77	5331.57	1353.5	4899.82	4537.93	1645.49	1568.79	5610.01	3195.68	5554.87	3840.94	3845.78	4443.94
2H-IS__SM_4[M+OAC]1-	793.783	4.36517	0	1951.87	1300.76	1225.36	1517.58	1831.21	2204.47	880.171	447.132	2393.6	1287.75	1134.42	1498.09	1490.32	1981.19	1077.26	576.464	2525.68	1401.11	2078.83	1866.91	2070.91	1612.86	253.546	1622.83	2533.7	1267.83	1809.16	1673.88	1711.45	2038.76	1109.36	2028.58	2494.85	1391.63	2155.98	566.664	2030.26	1850.16	683.7	643.261	2248.44	1318.22	2343.91	1584.5	1610.28	1803.95
2H-IS__SM_5[M+OAC]1-	794.786	5.54237	0	426.33	246.914	190.648	221.584	383.767	424.564	158.043	77.3155	526.475	250.679	178.992	293.075	281.203	405.303	141.279	99.3371	601.452	282.927	463.384	413.965	437.662	346.185	16.1864	327.398	557.71	264.794	380.858	377.492	351.658	463.984	217.794	420.552	543.97	254.078	487.48	90.2756	406.249	406.775	87.2638	63.0988	541.369	234.605	467.102	369.478	315.714	382.414
2H-IS__SM_6[M+OAC]1-	795.789	6.09643	0.2375	9.28306	6.97677	0	5.25655	0	5.29493	2.50334	3.84808	13.8297	0	5.32819	0	0	8.54336	9.4404	4.80016	13.5407	4.05247	23.105	8.50431	20.6408	4.2297	0	5.52969	26.6541	9.16812	8.66729	0	0	14.7529	0	17.7595	32.9062	8.74012	9.51079	0	4.55175	11.5013	3.78774	0	17.641	0	24.3952	0	12.0702	6.61422
2H-IS__SM_U	716.731	7.49933	0	1504.97	1461.82	1485.31	1524.76	736.485	1271.84	522.644	171.358	1732.02	1297.78	1370.89	1541.21	940.6	1075.23	790.79	268.462	1565.42	1114.49	1442.27	1308.01	1266.53	1110.93	264.557	878.716	1333.64	1056.32	1568.63	1447.56	1019.05	1293.42	795.756	940.816	1419.04	1257.86	1360.43	511.168	1188.92	1096.6	643.303	421.1	1391.05	1185.61	1568.54	1057.78	1365.7	1088.53
2H-IS__SM_U	717.737	8.75742	0	9666.73	9300.78	9511.7	9487.63	4817.68	8141.76	3511.57	1348.11	10886.3	7957.38	8847.17	9766.53	6202.71	6922.91	5137.76	1958.2	10423.4	7065.6	8907.75	7972.55	7776.91	7037.17	1743.08	5593.04	8718.91	6593.91	9646.8	9234.72	6736.75	8139.05	5180.56	5909.8	9197.64	7948.93	8163.57	3491.84	7693.73	6807.21	4314.92	2928.53	9461.29	7623.61	9056.36	6620.92	8488.8	7633.19
2H-IS__SM_U	718.742	8.77574	0	31873.7	30753.7	31510.3	32235	16001	26840.2	11341.8	4254.26	36445.9	26010.3	29297.1	32290.6	20553.3	23193.5	16838.3	6337.93	33947.6	23058.5	29818.3	27328.4	25885.2	23735.4	5770.62	18143	28895.9	21505.4	31725.6	31162.3	22062.8	26798.4	16986.1	19447	30746.6	26618.1	27546.6	11256.3	25385.1	22598.1	14080.7	9835.08	31402.1	24879.9	30639.7	21837.8	28012.6	25239.6
2H-IS__SM_U	719.746	7.30922	0	12182.8	11722.8	11689.5	11915.5	6163.94	10121.3	4312.72	1716.21	13685.8	9960.55	11083.8	12120.3	7851.41	8460.13	6158.1	2362.27	13055.6	8834.96	11295.2	10197.5	9926.61	9051.89	2225.77	7087.73	11127.5	8186.7	12096.7	11732.6	8213.46	10120.4	6614.65	7309.1	11841.2	10050	10424	4524.89	9562.91	8464.76	5488.54	3679.77	11853	9612.53	11507	8313.4	10404.9	9563.18
2H-IS__SM_U	720.75	9.25252	0	2415.15	2353.42	2326.13	2485.36	1272.94	2089.8	863.333	369.289	2753.07	2006.28	2225.18	2460.32	1543.89	1783.83	1248.62	483.36	2568.36	1822.23	2309.08	1949.56	2021.37	1838.2	403.808	1409.92	2187.8	1764.4	2521.09	2389.27	1705.79	2076.75	1340.91	1470.3	2538.08	1979.2	2123.93	861.299	1956.02	1748.79	1088.95	773.671	2380.71	1919.8	2392.73	1687.38	2109.7	1903.1
2H-IS__SM_U1[	716.731	7.49933	0	1504.97	1461.82	1485.31	1524.76	736.485	1271.84	522.644	171.358	1732.02	1297.78	1370.89	1541.21	940.6	1075.23	790.79	268.462	1565.42	1114.49	1442.27	1308.01	1266.53	1110.93	264.557	878.716	1333.64	1056.32	1568.63	1447.56	1019.05	1293.42	795.756	940.816	1419.04	1257.86	1360.43	511.168	1188.92	1096.6	643.303	421.1	1391.05	1185.61	1568.54	1057.78	1365.7	1088.53
2H-IS__SM_U2[	717.737	8.75742	0	9666.73	9300.78	9511.7	9487.63	4817.68	8141.76	3511.57	1348.11	10886.3	7957.38	8847.17	9766.53	6202.71	6922.91	5137.76	1958.2	10423.4	7065.6	8907.75	7972.55	7776.91	7037.17	1743.08	5593.04	8718.91	6593.91	9646.8	9234.72	6736.75	8139.05	5180.56	5909.8	9197.64	7948.93	8163.57	3491.84	7693.73	6807.21	4314.92	2928.53	9461.29	7623.61	9056.36	6620.92	8488.8	7633.19
2H-IS__SM_U3[	718.742	8.77574	0	31873.7	30753.7	31510.3	32235	16001	26840.2	11341.8	4254.26	36445.9	26010.3	29297.1	32290.6	20553.3	23193.5	16838.3	6337.93	33947.6	23058.5	29818.3	27328.4	25885.2	23735.4	5770.62	18143	28895.9	21505.4	31725.6	31162.3	22062.8	26798.4	16986.1	19447	30746.6	26618.1	27546.6	11256.3	25385.1	22598.1	14080.7	9835.08	31402.1	24879.9	30639.7	21837.8	28012.6	25239.6
2H-IS__SM_U4[	719.746	7.30922	0	12182.8	11722.8	11689.5	11915.5	6163.94	10121.3	4312.72	1716.21	13685.8	9960.55	11083.8	12120.3	7851.41	8460.13	6158.1	2362.27	13055.6	8834.96	11295.2	10197.5	9926.61	9051.89	2225.77	7087.73	11127.5	8186.7	12096.7	11732.6	8213.46	10120.4	6614.65	7309.1	11841.2	10050	10424	4524.89	9562.91	8464.76	5488.54	3679.77	11853	9612.53	11507	8313.4	10404.9	9563.18
2H-IS__SM_U5[	720.75	9.25252	0	2415.15	2353.42	2326.13	2485.36	1272.94	2089.8	863.333	369.289	2753.07	2006.28	2225.18	2460.32	1543.89	1783.83	1248.62	483.36	2568.36	1822.23	2309.08	1949.56	2021.37	1838.2	403.808	1409.92	2187.8	1764.4	2521.09	2389.27	1705.79	2076.75	1340.91	1470.3	2538.08	1979.2	2123.93	861.299	1956.02	1748.79	1088.95	773.671	2380.71	1919.8	2392.73	1687.38	2109.7	1903.1
2H-IS_Cer_[M+Cl]1-	600.659	5.02573	0.8125	0	9.55925	0	0	77.3022	0	58.6118	12.8545	0	15.8594	0	0	14.3739	0	0	0	5.16241	3.87659	0	0	0	6.35651	0	0	0	0	0	0	0	0	0	0	0	0	4.1384	0	0	0	0	5.47763	0	0	0	0	0	5.22367
2H-IS_Cer_[M+Cl]1-	601.665	4.71851	0	100.533	289.079	241.947	217.112	1666.29	75.473	800.568	368.227	88.7873	593.228	221.327	200.97	727.07	76.0485	191.481	180.257	57.7009	110.497	200.466	86.9036	121.548	145.166	9.21941	200.619	53.6131	263.418	211.591	337.431	113.18	83.9161	99.6097	91.5689	90.5123	97.6622	79.0372	24.0019	81.9506	29.3785	10.8729	36.7362	137.521	180.778	111.337	155.991	183.899	125.956
2H-IS_Cer_[M+Cl]1-	602.671	1.35657	0	1233.16	2344.64	2271.33	1962.73	11062.9	1284.38	5181.54	2406.58	1331.18	4220.16	2013.89	1938.36	5419.95	1189.07	1699.94	1218.38	963.56	1301.66	1532.41	1140.61	1229.26	1363.37	366.068	1506.8	1069.59	1848.47	1916.81	2220.05	1438.69	1097.54	1093.81	1387.06	1345.91	1064.21	1253.28	414.58	1214.38	640.36	388.366	896.265	1386.78	1633.59	1048.39	1488.17	1554.36	1501.67
2H-IS_Cer_[M+Cl]1-	603.675	3.00037	0	4313.08	7613.91	7493.04	6727.66	38147	4381.79	17812.1	8076.76	4365.81	14415.8	6564.29	6637.66	17827.1	4316.52	5882.63	4231.7	3145.94	4374.53	4884.07	3925.96	4058.19	4619.31	1084.73	5153.11	3376.05	6047.73	6201.18	7731.35	5046.77	4040.1	3358.95	4661.13	4385.84	3663.66	3988.86	1410.15	4085.09	2311.71	1511.16	2849.14	4765.33	5395.71	3878.29	4820.88	5248.28	4964.88
2H-IS_Cer_[M+Cl]1-	604.668	17.0734	0	1514.6	2752.12	2772	2345.2	13172.9	1681.27	6308.4	2859.56	1613.97	4992.45	2367.28	2329.63	6144.38	1610.25	1992.45	1472.96	1144.33	1584.87	1754.22	1427.41	1520.66	1653.45	409.932	1912.88	1246.52	2226.31	2262.42	2752.79	1746.85	1470.7	1162.65	1724.72	1572.08	1358.09	1451.33	494.048	1498.23	819.768	538.315	1018.43	1622.92	1949.33	1403.86	1797.51	1906.31	1688.25
2H-IS_Cer_[M+Cl]1-	605.674	1.22618	0	1336.3	2479.79	2449.25	2114.03	11725.9	1448.65	5644.99	2539.85	1471.2	4468.31	2235.58	2140.28	5493.2	1339.53	1896.88	1393.66	1000.17	1497.19	1543.79	1249.63	1342.16	1432.48	402.662	1706.71	1062.47	2075.23	2012.47	2487.69	1594.31	1324.65	1071.36	1486.27	1468.11	1230.46	1286.6	456.649	1390.44	713.43	475.49	987.412	1580.79	1820.02	1272.84	1544.56	1682.99	1614.86
2H-IS_Cer_[M+OAc]1-	624.704	7.87929	0.95	0	0	0	0	0	0	0	0	0	0	0	0	0	0	0	0	0	0	0	0	0	0	0	0	0	0	0	0	0	0	0	0	0	0	0	0	0	0	1.47727	0	0	0	0	0	4.22821	3.81871
2H-IS_Cer_[M+OAc]1-	625.709	5.35392	0.825	0	0	11.0812	10.3044	0	17.2331	0	0	4.74987	4.33856	0	0	3.67852	4.16531	5.46487	0	0	0	0	0	0	0	0	0	0	0	0	4.25671	0	0	0	0	0	3.59869	9.70987	0	0	0	0	4.22427	0	0	0	0	0	0
2H-IS_Cer_[M+OAc]1-	626.715	3.07663	0.0875	354.357	244.282	308.835	377.705	33.285	539.857	20.6726	13.2417	465.209	134.11	288.946	376.424	147.397	515.653	341.047	113.765	30.3719	5.56154	74.0176	41.4962	36.1951	24.6427	0	139.598	13.8974	0	34.0735	17.8424	18.2404	34.5217	0	126.624	40.1314	18.3195	72.3915	0	62.9995	27.2544	9.46521	16.511	60.1803	7.90416	78.7917	20.8251	20.9898	57.7042
2H-IS_Cer_[M+OAc]1-	627.721	1.81892	0	1318.06	1079.97	1314.81	1348.52	387.201	1744.81	220.7	65.2685	1558.41	662.716	1109.66	1380.59	715.328	1745.81	1382.69	379.828	338.375	99.6743	403.03	312.308	392.996	299.941	4.1471	678.738	269.03	60.8584	339.662	409.564	293.43	371.084	130.238	763.513	420.66	217.635	486.312	27.9952	389.707	334.457	95.3973	200.756	421.879	81.1603	433.893	206.812	306.885	457.745
2H-IS_Cer_[M+OAc]1-	628.684	11.0389	0.9625	0	0	0	0	17.6296	0	0	0	0	3.9314	0	0	0	0	0	0	0	0	0	0	0	0	0	0	0	7.25715	0	0	0	0	0	0	0	0	0	0	0	0	0	0	0	0	0	0	0	0
2H-IS_Cer_[M+OAc]1-	629.69	2.46875	0.8625	0	5.50485	0	0	459.555	0	133.131	30.8163	0	107.734	0	0	90.3641	0	0	3.69435	0	0	0	0	0	0	0	0	0	3.98705	0	0	0	4.70313	0	0	0	0	0	0	0	0	0	0	0	4.06961	0	4.25024	0	0
2H-IS_Cer_[M+OAc]1-	630.696	2.63836	0.625	4.26592	52.5574	0	3.84743	1722.84	0	601.178	194.213	0	302.011	0	0	410.979	0	5.19082	69.7171	0	17.6415	0	0	0	4.68393	5.68635	0	4.92604	38.9699	0	0	24.3205	0	3.74246	0	0	0	0	0	0	0	0	0	0	29.0849	0	28.1336	13.8075	0
2H-IS_Cer_[M-H]1-	564.682	3.66578	0	1050.68	695.813	928.96	1079.05	211.172	975.237	68.2099	19.6285	1144.15	461.688	776.406	1024.71	506.883	877.662	504.936	103.883	231.391	116.663	289.582	209.671	209.608	141.069	3.44031	122.786	124.451	53.2436	207.301	222.006	107.324	217.407	71.1509	147.866	205.722	224.916	246.359	14.6471	138.783	218.185	21.0392	6.72811	267.662	92.3962	236.003	152.148	132.739	251.06
2H-IS_Cer_[M-H]1-	565.688	1.70788	0	7664.84	5438.95	7245.58	8320.42	2082.93	7076	1041.63	379.854	9045.36	3775.12	6290.32	7815.28	3842.87	6394.68	4266.79	1027.49	2013.25	1272.15	2257.17	1981.19	1887.05	1314.01	241.435	1582.06	1605.57	1035.34	1947.9	2112.11	1450.91	1816.11	913.815	1548.35	1936.03	1783.35	2127.05	551.594	1840.18	1853.12	521.927	719.287	2364.84	1325.31	2303.52	1532.39	1732.87	1992.61
2H-IS_Cer_[M-H]1-	566.693	4.21276	0	40030.8	27150.4	38261.3	43283.9	10494.3	37615.7	5591.73	2011.3	48353.8	19405.6	32819.9	40520.4	20570.5	35643.6	22436.9	5747.16	10283.9	6398.25	11445.6	10310.1	9573.61	6999.09	1382.68	8735.17	7972.12	5055.78	9948.48	11029.8	7537.95	9585.74	4747.9	8902.65	10545.2	9162.27	11083.6	2693.52	9119.63	9694.43	2811.22	4102.12	11669.6	6159.44	11974.1	7675.85	8834.54	10621.6
2H-IS_Cer_[M-H]1-	567.698	1.1632	0	101942	69627.6	97345.3	107818	25871.2	98404.6	13639.1	4904.53	121924	48807	83406.8	102013	52046.8	94021.8	60957.1	15487.8	25272.8	14907.1	27854.8	24704.9	23322.3	17490.7	3408.83	22519.5	19653.6	12047	24298.6	26831.4	18430.5	23504.4	11790.1	22720.6	26144.5	22316.1	27252.7	6496.45	22396.8	23916.6	6897.45	10433.4	29195	15186.5	29344.2	18451.7	21658.4	26892.8
2H-IS_Cer_[M-H]1-	568.703	2.25131	0	34737.5	23919.8	33474.6	37058.5	8973.52	33704.3	4917.7	1796.77	41559.1	16902.4	28522.3	34703	18153.3	32225.2	20961.9	5319.99	8937.61	5529.18	9742.17	8896.36	8329.57	6365.66	1242.23	8011.3	7023.02	4394.45	8720.37	9778.22	6696.27	8349.26	4196.48	8093.82	9198.97	8058.72	9543.24	2420.27	8045.55	8470.34	2493.79	3737.6	10364.9	5475.04	10356.4	6592.23	7674.48	9588.52
2H-IS_Cer_1[M+Cl]1-	600.659	5.02573	0.8125	0	9.55925	0	0	77.3022	0	58.6118	12.8545	0	15.8594	0	0	14.3739	0	0	0	5.16241	3.87659	0	0	0	6.35651	0	0	0	0	0	0	0	0	0	0	0	0	4.1384	0	0	0	0	5.47763	0	0	0	0	0	5.22367
2H-IS_Cer_1[M+OAc]1-	624.704	7.87929	0.95	0	0	0	0	0	0	0	0	0	0	0	0	0	0	0	0	0	0	0	0	0	0	0	0	0	0	0	0	0	0	0	0	0	0	0	0	0	0	1.47727	0	0	0	0	0	4.22821	3.81871
2H-IS_Cer_1[M-H]1-	564.682	3.66578	0	1050.68	695.813	928.96	1079.05	211.172	975.237	68.2099	19.6285	1144.15	461.688	776.406	1024.71	506.883	877.662	504.936	103.883	231.391	116.663	289.582	209.671	209.608	141.069	3.44031	122.786	124.451	53.2436	207.301	222.006	107.324	217.407	71.1509	147.866	205.722	224.916	246.359	14.6471	138.783	218.185	21.0392	6.72811	267.662	92.3962	236.003	152.148	132.739	251.06
2H-IS_Cer_2[M+Cl]1-	601.665	4.71851	0	100.533	289.079	241.947	217.112	1666.29	75.473	800.568	368.227	88.7873	593.228	221.327	200.97	727.07	76.0485	191.481	180.257	57.7009	110.497	200.466	86.9036	121.548	145.166	9.21941	200.619	53.6131	263.418	211.591	337.431	113.18	83.9161	99.6097	91.5689	90.5123	97.6622	79.0372	24.0019	81.9506	29.3785	10.8729	36.7362	137.521	180.778	111.337	155.991	183.899	125.956
2H-IS_Cer_2[M+OAc]1-	625.709	5.35392	0.825	0	0	11.0812	10.3044	0	17.2331	0	0	4.74987	4.33856	0	0	3.67852	4.16531	5.46487	0	0	0	0	0	0	0	0	0	0	0	0	4.25671	0	0	0	0	0	3.59869	9.70987	0	0	0	0	4.22427	0	0	0	0	0	0
2H-IS_Cer_2[M-H]1-	565.688	1.70788	0	7664.84	5438.95	7245.58	8320.42	2082.93	7076	1041.63	379.854	9045.36	3775.12	6290.32	7815.28	3842.87	6394.68	4266.79	1027.49	2013.25	1272.15	2257.17	1981.19	1887.05	1314.01	241.435	1582.06	1605.57	1035.34	1947.9	2112.11	1450.91	1816.11	913.815	1548.35	1936.03	1783.35	2127.05	551.594	1840.18	1853.12	521.927	719.287	2364.84	1325.31	2303.52	1532.39	1732.87	1992.61
2H-IS_Cer_3[M+Cl]1-	602.671	1.35657	0	1233.16	2344.64	2271.33	1962.73	11062.9	1284.38	5181.54	2406.58	1331.18	4220.16	2013.89	1938.36	5419.95	1189.07	1699.94	1218.38	963.56	1301.66	1532.41	1140.61	1229.26	1363.37	366.068	1506.8	1069.59	1848.47	1916.81	2220.05	1438.69	1097.54	1093.81	1387.06	1345.91	1064.21	1253.28	414.58	1214.38	640.36	388.366	896.265	1386.78	1633.59	1048.39	1488.17	1554.36	1501.67
2H-IS_Cer_3[M+OAc]1-	626.715	3.07663	0.0875	354.357	244.282	308.835	377.705	33.285	539.857	20.6726	13.2417	465.209	134.11	288.946	376.424	147.397	515.653	341.047	113.765	30.3719	5.56154	74.0176	41.4962	36.1951	24.6427	0	139.598	13.8974	0	34.0735	17.8424	18.2404	34.5217	0	126.624	40.1314	18.3195	72.3915	0	62.9995	27.2544	9.46521	16.511	60.1803	7.90416	78.7917	20.8251	20.9898	57.7042
2H-IS_Cer_3[M-H]1-	566.693	4.21276	0	40030.8	27150.4	38261.3	43283.9	10494.3	37615.7	5591.73	2011.3	48353.8	19405.6	32819.9	40520.4	20570.5	35643.6	22436.9	5747.16	10283.9	6398.25	11445.6	10310.1	9573.61	6999.09	1382.68	8735.17	7972.12	5055.78	9948.48	11029.8	7537.95	9585.74	4747.9	8902.65	10545.2	9162.27	11083.6	2693.52	9119.63	9694.43	2811.22	4102.12	11669.6	6159.44	11974.1	7675.85	8834.54	10621.6
2H-IS_Cer_4[M+Cl]1-	603.675	3.00037	0	4313.08	7613.91	7493.04	6727.66	38147	4381.79	17812.1	8076.76	4365.81	14415.8	6564.29	6637.66	17827.1	4316.52	5882.63	4231.7	3145.94	4374.53	4884.07	3925.96	4058.19	4619.31	1084.73	5153.11	3376.05	6047.73	6201.18	7731.35	5046.77	4040.1	3358.95	4661.13	4385.84	3663.66	3988.86	1410.15	4085.09	2311.71	1511.16	2849.14	4765.33	5395.71	3878.29	4820.88	5248.28	4964.88
2H-IS_Cer_4[M+OAc]1-	627.721	1.81892	0	1318.06	1079.97	1314.81	1348.52	387.201	1744.81	220.7	65.2685	1558.41	662.716	1109.66	1380.59	715.328	1745.81	1382.69	379.828	338.375	99.6743	403.03	312.308	392.996	299.941	4.1471	678.738	269.03	60.8584	339.662	409.564	293.43	371.084	130.238	763.513	420.66	217.635	486.312	27.9952	389.707	334.457	95.3973	200.756	421.879	81.1603	433.893	206.812	306.885	457.745
2H-IS_Cer_4[M-H]1-	567.698	1.1632	0	101942	69627.6	97345.3	107818	25871.2	98404.6	13639.1	4904.53	121924	48807	83406.8	102013	52046.8	94021.8	60957.1	15487.8	25272.8	14907.1	27854.8	24704.9	23322.3	17490.7	3408.83	22519.5	19653.6	12047	24298.6	26831.4	18430.5	23504.4	11790.1	22720.6	26144.5	22316.1	27252.7	6496.45	22396.8	23916.6	6897.45	10433.4	29195	15186.5	29344.2	18451.7	21658.4	26892.8
2H-IS_Cer_5[M+Cl]1-	604.668	17.0734	0	1514.6	2752.12	2772	2345.2	13172.9	1681.27	6308.4	2859.56	1613.97	4992.45	2367.28	2329.63	6144.38	1610.25	1992.45	1472.96	1144.33	1584.87	1754.22	1427.41	1520.66	1653.45	409.932	1912.88	1246.52	2226.31	2262.42	2752.79	1746.85	1470.7	1162.65	1724.72	1572.08	1358.09	1451.33	494.048	1498.23	819.768	538.315	1018.43	1622.92	1949.33	1403.86	1797.51	1906.31	1688.25
2H-IS_Cer_5[M+OAc]1-	628.684	11.0389	0.9625	0	0	0	0	17.6296	0	0	0	0	3.9314	0	0	0	0	0	0	0	0	0	0	0	0	0	0	0	7.25715	0	0	0	0	0	0	0	0	0	0	0	0	0	0	0	0	0	0	0	0
2H-IS_Cer_5[M-H]1-	568.703	2.25131	0	34737.5	23919.8	33474.6	37058.5	8973.52	33704.3	4917.7	1796.77	41559.1	16902.4	28522.3	34703	18153.3	32225.2	20961.9	5319.99	8937.61	5529.18	9742.17	8896.36	8329.57	6365.66	1242.23	8011.3	7023.02	4394.45	8720.37	9778.22	6696.27	8349.26	4196.48	8093.82	9198.97	8058.72	9543.24	2420.27	8045.55	8470.34	2493.79	3737.6	10364.9	5475.04	10356.4	6592.23	7674.48	9588.52
2H-IS_Cer_6[M+Cl]1-	605.674	1.22618	0	1336.3	2479.79	2449.25	2114.03	11725.9	1448.65	5644.99	2539.85	1471.2	4468.31	2235.58	2140.28	5493.2	1339.53	1896.88	1393.66	1000.17	1497.19	1543.79	1249.63	1342.16	1432.48	402.662	1706.71	1062.47	2075.23	2012.47	2487.69	1594.31	1324.65	1071.36	1486.27	1468.11	1230.46	1286.6	456.649	1390.44	713.43	475.49	987.412	1580.79	1820.02	1272.84	1544.56	1682.99	1614.86
2H-IS_Cer_6[M+OAc]1-	629.69	2.46875	0.8625	0	5.50485	0	0	459.555	0	133.131	30.8163	0	107.734	0	0	90.3641	0	0	3.69435	0	0	0	0	0	0	0	0	0	3.98705	0	0	0	4.70313	0	0	0	0	0	0	0	0	0	0	0	4.06961	0	4.25024	0	0
2H-IS_Cer_7[M+OAc]1-	630.696	2.63836	0.625	4.26592	52.5574	0	3.84743	1722.84	0	601.178	194.213	0	302.011	0	0	410.979	0	5.19082	69.7171	0	17.6415	0	0	0	4.68393	5.68635	0	4.92604	38.9699	0	0	24.3205	0	3.74246	0	0	0	0	0	0	0	0	0	0	29.0849	0	28.1336	13.8075	0
2H-IS_Cer_U	609.681	9.34915	1	0	0	0	0	0	0	0	0	0	0	0	0	0	0	0	0	0	0	0	0	0	0	0	0	0	0	0	0	0	0	0	0	0	0	0	0	0	0	0	0	0	0	0	0	0	0
2H-IS_Cer_U	610.688	10.0632	0.925	0	0	0	0	0	0	0	0	0	0	0	0	0	0	0	0	0	0	0	0	0	0	0	0	0	0	0	0	0	0	0	3.59612	0	0	0	3.65225	0	5.53791	0	0	0	0	0	0	3.64215	0
2H-IS_Cer_U	611.694	5.22804	0.5625	15.7267	28.4129	21.7051	14.0819	5.74392	70.5681	0	2.81452	26.0541	16.7098	29.1938	25.4665	20.8055	75.5924	73.5864	40.82	0	3.87051	0	0	0	0	0	17.698	0	0	10.2167	0	0	0	0	21.1252	0	7.78286	0	0	0	4.78651	3.8503	4.78728	0	0	2.86782	0	0	0
2H-IS_Cer_U	612.699	2.71952	0	546.087	625.298	885.823	773.902	207.929	1121.33	229.403	51.6036	664.329	392.101	682.958	676.62	517.228	1265.33	1247.71	425.01	71.6785	104.258	197.442	177.61	209.995	189.629	65.3611	552.442	76.0376	55.7427	171.274	182.649	235.858	119.894	167.647	494.553	106.026	195.95	205.2	62.0189	216.815	186.589	153.475	235.686	152.481	105.539	184.074	187.344	210.274	330.998
2H-IS_Cer_U	613.705	3.28379	0	1827.87	2118.35	2812.25	2725.54	937.984	3895.21	1028.62	296.107	2195.45	1461.55	2371.79	2235.48	1767.83	4174.83	4351.01	1507.43	550.712	554.048	968.136	868.217	824.435	808.223	383.311	1882.88	497.468	456.054	739.354	805.024	899.768	821.76	608.641	1662.5	700.574	773.478	932.767	313.48	887.945	906.474	666.452	914.41	771.166	517.733	888.494	758.848	757.974	1286.13
2H-IS_Cer_U	614.709	4.6179	0	726.909	813.711	1042.41	1015.85	342.843	1478.47	336.858	81.6406	726.322	487.503	886.821	837.829	637.212	1448.87	1530.31	545.418	130.945	189.944	332.674	261.619	272.809	269.411	96.4435	729.809	120.802	100.453	241.504	284.21	275.47	278.308	184.226	651.835	193.87	283.151	314.984	98.4677	299.388	303.758	239.26	247.531	223.417	147.918	292.919	234.302	252.073	511.215
2H-IS_Cer_U	615.714	6.70849	0.2625	52.4144	36.2356	115.91	91.0608	6.55713	173.73	7.9138	3.54647	60.4128	51.0818	57.0848	35.426	58.6884	213.408	231.309	87.8636	0	8.46612	5.82434	0	11.9702	10.6249	3.0457	58.7062	0	0	5.81155	5.81911	7.29897	4.09436	0	31.5004	5.29368	0	4.39587	0	14.4827	8.75396	13.6672	0	10.3686	0	4.68743	9.51671	3.65338	9.78689
2H-IS_Cer_U1[	609.681	9.34915	1	0	0	0	0	0	0	0	0	0	0	0	0	0	0	0	0	0	0	0	0	0	0	0	0	0	0	0	0	0	0	0	0	0	0	0	0	0	0	0	0	0	0	0	0	0	0
2H-IS_Cer_U2[	610.688	10.0632	0.925	0	0	0	0	0	0	0	0	0	0	0	0	0	0	0	0	0	0	0	0	0	0	0	0	0	0	0	0	0	0	0	3.59612	0	0	0	3.65225	0	5.53791	0	0	0	0	0	0	3.64215	0
2H-IS_Cer_U3[	611.694	5.22804	0.5625	15.7267	28.4129	21.7051	14.0819	5.74392	70.5681	0	2.81452	26.0541	16.7098	29.1938	25.4665	20.8055	75.5924	73.5864	40.82	0	3.87051	0	0	0	0	0	17.698	0	0	10.2167	0	0	0	0	21.1252	0	7.78286	0	0	0	4.78651	3.8503	4.78728	0	0	2.86782	0	0	0
2H-IS_Cer_U4[	612.699	2.71952	0	546.087	625.298	885.823	773.902	207.929	1121.33	229.403	51.6036	664.329	392.101	682.958	676.62	517.228	1265.33	1247.71	425.01	71.6785	104.258	197.442	177.61	209.995	189.629	65.3611	552.442	76.0376	55.7427	171.274	182.649	235.858	119.894	167.647	494.553	106.026	195.95	205.2	62.0189	216.815	186.589	153.475	235.686	152.481	105.539	184.074	187.344	210.274	330.998
2H-IS_Cer_U5[	613.705	3.28379	0	1827.87	2118.35	2812.25	2725.54	937.984	3895.21	1028.62	296.107	2195.45	1461.55	2371.79	2235.48	1767.83	4174.83	4351.01	1507.43	550.712	554.048	968.136	868.217	824.435	808.223	383.311	1882.88	497.468	456.054	739.354	805.024	899.768	821.76	608.641	1662.5	700.574	773.478	932.767	313.48	887.945	906.474	666.452	914.41	771.166	517.733	888.494	758.848	757.974	1286.13
2H-IS_Cer_U6[	614.709	4.6179	0	726.909	813.711	1042.41	1015.85	342.843	1478.47	336.858	81.6406	726.322	487.503	886.821	837.829	637.212	1448.87	1530.31	545.418	130.945	189.944	332.674	261.619	272.809	269.411	96.4435	729.809	120.802	100.453	241.504	284.21	275.47	278.308	184.226	651.835	193.87	283.151	314.984	98.4677	299.388	303.758	239.26	247.531	223.417	147.918	292.919	234.302	252.073	511.215
2H-IS_Cer_U7[	615.714	6.70849	0.2625	52.4144	36.2356	115.91	91.0608	6.55713	173.73	7.9138	3.54647	60.4128	51.0818	57.0848	35.426	58.6884	213.408	231.309	87.8636	0	8.46612	5.82434	0	11.9702	10.6249	3.0457	58.7062	0	0	5.81155	5.81911	7.29897	4.09436	0	31.5004	5.29368	0	4.39587	0	14.4827	8.75396	13.6672	0	10.3686	0	4.68743	9.51671	3.65338	9.78689
2H-IS_FA_15_[M-H]1-	268.388	4.95986	0	1383.79	941.422	1330.67	1379.83	512.192	1436.12	213.025	151.122	1612.58	668.055	1195.65	1287.63	707.897	1558.28	1182.89	290.834	602.016	294.923	757.378	642.964	653.494	570.878	12.5596	834.904	547.626	196.84	684.47	664.516	598.144	740.342	269.133	766.882	745.56	494.922	786.934	135.567	688.538	678.159	93.0938	422.192	787.102	312.87	731.274	478.004	551.942	805.054
2H-IS_FA_15_[M-H]1-	269.394	4.91492	0	13753.8	9831.53	13115.5	13330.4	5146.73	14884	2626.78	1992.31	15209.1	6645.72	11461.3	13042	7290.49	15428.9	11765.1	3234.89	6241.24	3159.9	7922.04	6475.58	6481.13	5491.85	445.963	8114.87	5207.46	2429.67	7074.79	7166.78	5862.07	7429.68	3100.72	7630.05	7664.94	5089.91	7798.67	1524.85	7628.18	6921.16	1319.43	4281.19	7691.58	3582.88	7607.8	4758.28	5566.21	7705.57
2H-IS_FA_15_[M-H]1-	270.4	5.85706	0	62513.9	43437	59556.3	61423.2	24067.2	66282.8	12396.2	9558.23	69013.1	30599.8	52822.9	58973.1	33672.9	70045.1	53329.8	15152.8	28061.9	14664	35787.3	30186.1	29991.3	26006.3	1981.5	36822.3	23952.6	11192.4	32221.9	33863.3	27096.4	34209.9	14080.7	34935.1	34575.1	22956.4	36603.5	7090.73	33964.5	32186.8	6310.36	19677.2	35442.1	16590.7	34568	22340.5	25945.1	35523.5
2H-IS_FA_15_[M-H]1-	271.404	4.01616	0	10000.9	6781.8	9292.52	9626.72	3641.43	10445.1	1860.42	1436.56	10804.8	4883.08	8216.84	9220.5	5195.85	11115.6	8273.83	2350.11	4379.29	2199.54	5568.7	4632.26	4669.08	4025.03	301.424	5733.6	3584.79	1788.17	5049.13	5231.1	4137.57	5251.38	2150.81	5406.5	5371.51	3507.92	5816.29	1058.78	5321.03	4826.57	958.597	2967.79	5563.85	2607.99	5379.72	3409.17	3943.42	5531.8
2H-IS_FA_15_[M-H]1-	272.407	4.46942	0	727.366	494.414	619.533	680.399	266.461	735.373	82.375	51.1793	788.984	269.143	603.23	646.027	366.223	823.184	540.349	141.392	273.501	117.286	377.794	312.191	329.556	254.453	7.84919	397.846	213.282	72.5585	355.007	344.537	283.841	330.432	94.15	347.082	332.098	233.28	389.481	53.364	342.851	291.503	25.1266	119.486	371.593	146.507	393.312	194.586	223.594	382.366
2H-IS_FA_15_1[M-H]1-	268.388	4.95986	0	1383.79	941.422	1330.67	1379.83	512.192	1436.12	213.025	151.122	1612.58	668.055	1195.65	1287.63	707.897	1558.28	1182.89	290.834	602.016	294.923	757.378	642.964	653.494	570.878	12.5596	834.904	547.626	196.84	684.47	664.516	598.144	740.342	269.133	766.882	745.56	494.922	786.934	135.567	688.538	678.159	93.0938	422.192	787.102	312.87	731.274	478.004	551.942	805.054
2H-IS_FA_15_2[M-H]1-	269.394	4.91492	0	13753.8	9831.53	13115.5	13330.4	5146.73	14884	2626.78	1992.31	15209.1	6645.72	11461.3	13042	7290.49	15428.9	11765.1	3234.89	6241.24	3159.9	7922.04	6475.58	6481.13	5491.85	445.963	8114.87	5207.46	2429.67	7074.79	7166.78	5862.07	7429.68	3100.72	7630.05	7664.94	5089.91	7798.67	1524.85	7628.18	6921.16	1319.43	4281.19	7691.58	3582.88	7607.8	4758.28	5566.21	7705.57
2H-IS_FA_15_3[M-H]1-	270.4	5.85706	0	62513.9	43437	59556.3	61423.2	24067.2	66282.8	12396.2	9558.23	69013.1	30599.8	52822.9	58973.1	33672.9	70045.1	53329.8	15152.8	28061.9	14664	35787.3	30186.1	29991.3	26006.3	1981.5	36822.3	23952.6	11192.4	32221.9	33863.3	27096.4	34209.9	14080.7	34935.1	34575.1	22956.4	36603.5	7090.73	33964.5	32186.8	6310.36	19677.2	35442.1	16590.7	34568	22340.5	25945.1	35523.5
2H-IS_FA_15_4[M-H]1-	271.404	4.01616	0	10000.9	6781.8	9292.52	9626.72	3641.43	10445.1	1860.42	1436.56	10804.8	4883.08	8216.84	9220.5	5195.85	11115.6	8273.83	2350.11	4379.29	2199.54	5568.7	4632.26	4669.08	4025.03	301.424	5733.6	3584.79	1788.17	5049.13	5231.1	4137.57	5251.38	2150.81	5406.5	5371.51	3507.92	5816.29	1058.78	5321.03	4826.57	958.597	2967.79	5563.85	2607.99	5379.72	3409.17	3943.42	5531.8
2H-IS_FA_15_5[M-H]1-	272.407	4.46942	0	727.366	494.414	619.533	680.399	266.461	735.373	82.375	51.1793	788.984	269.143	603.23	646.027	366.223	823.184	540.349	141.392	273.501	117.286	377.794	312.191	329.556	254.453	7.84919	397.846	213.282	72.5585	355.007	344.537	283.841	330.432	94.15	347.082	332.098	233.28	389.481	53.364	342.851	291.503	25.1266	119.486	371.593	146.507	393.312	194.586	223.594	382.366
2H-IS_FA_17_[M-H]1-	300.444	4.9718	0	3088.82	2158.12	2923.62	3010.29	1124.85	2996.45	553.972	320.748	3294.33	1467.77	2562.47	3035.17	1718.21	3246.58	2429.17	619.508	1518.4	823.224	1881.33	1624.97	1538.34	1336.77	113.415	1840.93	1353.62	599.937	1709.68	1886.08	1502.22	1836.99	762.554	1738.94	1878.95	1245.89	1929.3	374.534	1795.07	1687.9	335.602	993.229	1956.01	940.256	1836.33	1196.75	1442.14	1908.26
2H-IS_FA_17_[M-H]1-	301.45	3.40247	0	23652.4	16352.8	22527.5	23136.4	9094.8	23114.1	4722.84	2802.58	24931.8	11682.1	19699.6	22254.9	12572	24352.2	17908.5	5150.51	11780.4	6361.72	14640.3	12404.3	12296.1	10647.5	1061.59	14234	10007.4	5044.49	12888.9	13626.8	10518.8	13961.7	5992.9	13393.4	14058.2	9813.3	14473.7	2936.87	13410.8	12524.2	2852.06	7358.45	14830.1	7154.66	14049.1	9152.91	10643.1	14709.4
2H-IS_FA_17_[M-H]1-	302.456	4.35325	0	83005.3	59486	80159.5	81384.8	32660.9	83084.2	17331	10210.7	88917.8	42752.7	69900.8	79054.8	45437.5	85790.5	63614.2	18542.2	42689.9	23806.7	52432.3	44742.4	44635	38507.8	3486.79	51757.6	36938	18464.1	47957.8	49822.1	38439.1	49882.6	22305.1	48133.8	51199.7	36057.6	52187.1	11021.5	49127.6	46410.4	10230.8	28262.5	53183.6	27193.6	50878.1	33364.8	39396	52844.4
2H-IS_FA_17_[M-H]1-	303.46	2.85595	0	14891.9	10532.2	14095.1	14594.3	5671.34	14891	3046.06	1737.57	16097.7	7409.76	12514.1	14342.7	7935.05	15412.5	11459	3362.95	7535.01	4119.33	9529.07	7957.66	7820.91	6743.28	584.516	9056.11	6328.94	3202.92	8465.54	8787.54	6810.97	8912.58	3845.81	8521.58	8984.57	6317.54	9299.25	1856.26	8440.42	8170.74	1774.31	4905.69	9456.66	4654.52	8853.83	5719.26	6917.96	9155.53
2H-IS_FA_17_[M-H]1-	304.463	3.81409	0	1053.41	782.107	1084.71	1109.95	419.313	1134.32	174.024	93.1028	1175.79	576.507	973.388	1100.03	560.596	1179.85	905.913	215.222	536.14	290.4	721.55	576.515	617.33	503.188	2.60599	678.665	488.523	200.382	620.614	694.03	472.985	661.482	277.079	574.942	674.408	436.766	716.655	102.751	633.855	572.043	107.247	304.528	690.824	351.603	695.118	375.914	465.847	664.644
2H-IS_FA_17_1[M-H]1-	300.444	4.9718	0	3088.82	2158.12	2923.62	3010.29	1124.85	2996.45	553.972	320.748	3294.33	1467.77	2562.47	3035.17	1718.21	3246.58	2429.17	619.508	1518.4	823.224	1881.33	1624.97	1538.34	1336.77	113.415	1840.93	1353.62	599.937	1709.68	1886.08	1502.22	1836.99	762.554	1738.94	1878.95	1245.89	1929.3	374.534	1795.07	1687.9	335.602	993.229	1956.01	940.256	1836.33	1196.75	1442.14	1908.26
2H-IS_FA_17_2[M-H]1-	301.45	3.40247	0	23652.4	16352.8	22527.5	23136.4	9094.8	23114.1	4722.84	2802.58	24931.8	11682.1	19699.6	22254.9	12572	24352.2	17908.5	5150.51	11780.4	6361.72	14640.3	12404.3	12296.1	10647.5	1061.59	14234	10007.4	5044.49	12888.9	13626.8	10518.8	13961.7	5992.9	13393.4	14058.2	9813.3	14473.7	2936.87	13410.8	12524.2	2852.06	7358.45	14830.1	7154.66	14049.1	9152.91	10643.1	14709.4
2H-IS_FA_17_3[M-H]1-	302.456	4.35325	0	83005.3	59486	80159.5	81384.8	32660.9	83084.2	17331	10210.7	88917.8	42752.7	69900.8	79054.8	45437.5	85790.5	63614.2	18542.2	42689.9	23806.7	52432.3	44742.4	44635	38507.8	3486.79	51757.6	36938	18464.1	47957.8	49822.1	38439.1	49882.6	22305.1	48133.8	51199.7	36057.6	52187.1	11021.5	49127.6	46410.4	10230.8	28262.5	53183.6	27193.6	50878.1	33364.8	39396	52844.4
2H-IS_FA_17_4[M-H]1-	303.46	2.85595	0	14891.9	10532.2	14095.1	14594.3	5671.34	14891	3046.06	1737.57	16097.7	7409.76	12514.1	14342.7	7935.05	15412.5	11459	3362.95	7535.01	4119.33	9529.07	7957.66	7820.91	6743.28	584.516	9056.11	6328.94	3202.92	8465.54	8787.54	6810.97	8912.58	3845.81	8521.58	8984.57	6317.54	9299.25	1856.26	8440.42	8170.74	1774.31	4905.69	9456.66	4654.52	8853.83	5719.26	6917.96	9155.53
2H-IS_FA_17_5[M-H]1-	304.463	3.81409	0	1053.41	782.107	1084.71	1109.95	419.313	1134.32	174.024	93.1028	1175.79	576.507	973.388	1100.03	560.596	1179.85	905.913	215.222	536.14	290.4	721.55	576.515	617.33	503.188	2.60599	678.665	488.523	200.382	620.614	694.03	472.985	661.482	277.079	574.942	674.408	436.766	716.655	102.751	633.855	572.043	107.247	304.528	690.824	351.603	695.118	375.914	465.847	664.644
2H-IS_FA_20_[M-H]1-	348.529	2.64349	0	3544.88	2640.36	3757.44	3744.69	1482.96	3626.78	754.379	317.135	3976.1	1846.88	3283.16	3585.82	2093.24	3735.57	2727.4	705.663	1933.23	1192.87	2361.59	2015.28	2032.75	1750.14	177.25	2269.48	1714.39	913.982	2235.42	2310.42	1761.43	2286.13	1035.77	2096.98	2171.47	1717.11	2314.14	466.769	2158.72	2129.32	462.657	1244.58	2465.79	1294.68	2379.79	1585.36	1828.09	2406.12
2H-IS_FA_20_[M-H]1-	349.535	4.23419	0	35786.6	26062.2	36158.9	37245.5	13911.6	35706.4	7846.13	3163.86	39024.3	19148.9	31248.8	35610.9	20820.8	36447.7	27135.8	7009.05	19292.7	11712.8	24182.2	20871.4	20693.7	17430.1	1975.75	22186.6	16155.1	8720.18	21976	23087.5	17277.7	22272.1	10429.5	20926.6	22954.9	17184.4	23459.2	5003.28	21758.4	21187.2	4817.8	12710.4	23859	12741.8	23325.6	15766.5	18022.5	23994.5
2H-IS_FA_20_[M-H]1-	350.541	4.83159	0	174121	129541	177488	183869	75481	175599	41871	17284.1	189296	98069.8	155978	176027	105501	179214	136149	36644.5	101595	61558.3	120545	106367	106268	89128.5	11053.1	111690	84847.9	47574.5	111980	116753	89823.2	113440	56520.3	105132	114685	89084.1	119334	26895.5	112636	105912	26548.8	66985.4	120503	68523.6	118463	82686.3	94228.1	120805
2H-IS_FA_20_[M-H]1-	351.544	3.18375	0	40311	28921.2	40716.4	41638.7	16143	39532.6	8813.86	3668.87	43441.2	21729.8	34393.9	39619.4	22688.1	40325.5	30206.2	7771.01	22221.7	13084.5	26931.8	23300.2	23087.7	19595.4	2283.94	25111.9	18368.1	9925.62	24455.9	25392	19119	24895	11555.9	23168.4	25582.3	19348.7	26585	5633.36	24349.9	23236.8	5383.01	14003	27017.9	14461	26004.5	17578.6	20116.6	27157.9
2H-IS_FA_20_[M-H]1-	352.547	5.95665	0	3177.71	2385.82	3310.38	3404.23	1333.21	3303.56	722.102	241.389	3507.24	1808.59	2850.07	3210.51	1880.61	3332.83	2407.42	630.848	1744.7	1005.65	2211.09	1931.41	1854.15	1617.77	157.543	1980.76	1429.38	766.465	2043.35	2157.3	1636.1	2112.63	932.878	1930.06	2014.78	1604.26	2138.12	427.255	1994.97	1969.67	406.333	1225.67	2131.66	1130.79	2159.74	1461.6	1655.26	2151.52
2H-IS_FA_20_1[M-H]1-	348.529	2.64349	0	3544.88	2640.36	3757.44	3744.69	1482.96	3626.78	754.379	317.135	3976.1	1846.88	3283.16	3585.82	2093.24	3735.57	2727.4	705.663	1933.23	1192.87	2361.59	2015.28	2032.75	1750.14	177.25	2269.48	1714.39	913.982	2235.42	2310.42	1761.43	2286.13	1035.77	2096.98	2171.47	1717.11	2314.14	466.769	2158.72	2129.32	462.657	1244.58	2465.79	1294.68	2379.79	1585.36	1828.09	2406.12
2H-IS_FA_20_2[M-H]1-	349.535	4.23419	0	35786.6	26062.2	36158.9	37245.5	13911.6	35706.4	7846.13	3163.86	39024.3	19148.9	31248.8	35610.9	20820.8	36447.7	27135.8	7009.05	19292.7	11712.8	24182.2	20871.4	20693.7	17430.1	1975.75	22186.6	16155.1	8720.18	21976	23087.5	17277.7	22272.1	10429.5	20926.6	22954.9	17184.4	23459.2	5003.28	21758.4	21187.2	4817.8	12710.4	23859	12741.8	23325.6	15766.5	18022.5	23994.5
2H-IS_FA_20_3[M-H]1-	350.541	4.83159	0	174121	129541	177488	183869	75481	175599	41871	17284.1	189296	98069.8	155978	176027	105501	179214	136149	36644.5	101595	61558.3	120545	106367	106268	89128.5	11053.1	111690	84847.9	47574.5	111980	116753	89823.2	113440	56520.3	105132	114685	89084.1	119334	26895.5	112636	105912	26548.8	66985.4	120503	68523.6	118463	82686.3	94228.1	120805
2H-IS_FA_20_4[M-H]1-	351.544	3.18375	0	40311	28921.2	40716.4	41638.7	16143	39532.6	8813.86	3668.87	43441.2	21729.8	34393.9	39619.4	22688.1	40325.5	30206.2	7771.01	22221.7	13084.5	26931.8	23300.2	23087.7	19595.4	2283.94	25111.9	18368.1	9925.62	24455.9	25392	19119	24895	11555.9	23168.4	25582.3	19348.7	26585	5633.36	24349.9	23236.8	5383.01	14003	27017.9	14461	26004.5	17578.6	20116.6	27157.9
2H-IS_FA_20_5[M-H]1-	352.547	5.95665	0	3177.71	2385.82	3310.38	3404.23	1333.21	3303.56	722.102	241.389	3507.24	1808.59	2850.07	3210.51	1880.61	3332.83	2407.42	630.848	1744.7	1005.65	2211.09	1931.41	1854.15	1617.77	157.543	1980.76	1429.38	766.465	2043.35	2157.3	1636.1	2112.63	932.878	1930.06	2014.78	1604.26	2138.12	427.255	1994.97	1969.67	406.333	1225.67	2131.66	1130.79	2159.74	1461.6	1655.26	2151.52
Cer_40:1_[M+Cl]1-	656.575	3.6317	0.325	0	6.23485	6.32011	6.30191	183.678	3.30606	19.2963	5.35573	0	48.2414	5.5549	0	39.1835	0	6.44399	5.52561	0	0	0	0	0	4.60781	0	0	3.67135	8.67906	12.0513	0	0	4.24613	0	4.40487	0	0	0	0	5.99228	4.00205	0	5.47678	4.45268	5.85093	0	22.6438	5.24517	4.55658
Cer_42:1_[M+Cl]1-	684.607	1.9026	0.0125	27.1204	89.6421	86.7408	65.8175	712.581	15.363	221.478	98.8128	16.2951	181.336	90.6914	35.0746	219.235	26.6771	187.475	22.4581	10.8445	77.3278	100.947	71.9908	56.5606	110.065	0	64.5977	83.1347	86.7068	64.6071	110.736	86.8442	30.1245	4.68981	33.0976	49.4295	24.5926	26.2582	11.7645	64.3698	19.4522	18.4527	1458.41	22.4151	88.1118	45.7032	43.8731	43.8225	45.2312
LPC_18:2_[M+Cl]1-	554.302	1.6405	0.025	58.1356	26.0188	117.052	74.7621	3.15701	54.8501	0	0	45.2122	65.2885	88.807	72.9552	21.141	49.9631	118.009	7.74936	92.7547	66.5938	232.128	168.356	151.069	222.413	5.63428	246.532	135.161	36.6908	339.546	211.003	169.895	135.551	47.6111	190.01	186.068	109.729	132.607	8.69728	328.787	48.0797	6.53642	352.43	157.104	69.634	127.759	35.9704	244.216	186.199
LPC_20:3_[M+OAC]1-	604.362	3.05059	0.125	4.60974	5.04194	0	5.92297	10.032	0	4.82723	3.09377	0	9.03323	7.59311	0	4.16653	0	0	3.41483	32.7858	4.25707	10.95	20.6003	21.6295	27.7035	7.47562	5.2824	45.6404	4.12588	10.0038	6.5704	23.9432	15.7279	0	4.53458	18.1858	8.97059	15.2833	12.9856	19.8929	5.56756	9.90107	0	34.8751	12.231	9.50724	4.28687	9.52536	16.0286
LPC_20:4_[M+Cl]1-	578.302	3.54832	0.425	0	4.27475	0	10.7141	3.09879	0	0	0	0	7.15238	0	0	0	11.104	17.557	0	0	0	5.00572	0	4.60455	6.78646	0	10.5803	0	0	20.2775	17.206	7.89226	5.47095	3.91614	4.21351	7.92159	0	0	0	25.1543	0	0	17.6315	0	4.68916	0	0	4.52512	16.9849
LPC-O_18:1_[M+Cl]1-	542.338	6.4242	0.4375	0	0	0	0	0	0	0	0	0	7.15915	0	0	3.70442	0	22.2474	8.67734	0	0	4.90412	12.5659	4.53773	0	6.24464	24.3689	0	0	3.83935	4.01118	0	12.1763	0	18.4291	6.6305	3.80856	4.68595	2.99907	9.26448	4.17672	3.00817	3.90667	0	0	0	0	2.56215	4.02592
LPE_16:0_[M-H]1-	452.278	1.84252	0	392.626	303.066	383.938	393.968	291.479	520.799	181.697	36.724	416.602	368.964	478.94	438.319	389.565	425.869	512.583	136.409	468.215	377.388	551.645	422.624	472.497	465.8	144.462	515.24	522.694	270.965	483.863	511.328	422.934	575.259	239.618	535.546	542.263	389.244	427.695	115.031	602.418	395.77	190.067	341.885	477.447	399.449	587.023	319.225	579.237	496.536
LPE_18:0_[M-H]1-	480.31	3.37022	0	12077.8	11236.9	13930	15196	8027.58	17192.9	6647.77	1881.55	13473.1	12427.6	15221	13661.9	10358.8	13474.2	12844.1	4186.87	13192.3	10683.4	14242.8	12068.6	13180.5	14191.6	3988.97	13498.4	14962.4	8305.73	15619.1	14373.5	12942.4	14309.8	8660.03	11910.3	16010.9	10123.7	11621.2	4190.1	16998.4	11779.3	5681.38	7442.24	12478.5	11059	13021.6	9131.85	12241.7	13524.8
LPE_18:1_[M-H]1-	478.294	3.14144	0	518.301	429.439	589.951	585.038	329.603	670.006	283.403	65.6599	537.489	448.731	649.254	562.722	382.669	609.053	591.467	173.392	589.953	494.651	675.24	626.346	608.364	651.935	195.954	779.045	651.229	353.778	704.821	717.131	601.387	664.354	404.245	677.241	748.053	531.802	604.669	162.088	789.178	544.537	285.321	553.568	612.348	459.973	628.448	464.44	577.33	723.43
LPE_18:2_[M-H]1-	476.278	2.3015	0.0375	27.2234	0	5.04045	33.6911	0	20.399	4.87118	0	4.57816	26.0485	12.6997	5.42542	12.6649	18.5734	38.2411	5.22698	9.64012	24.9874	49.6879	42.1411	46.281	31.3872	9.7631	45.2448	51.5519	3.54489	58.6074	79.9398	29.3561	61.8212	25.612	30.5245	71.6333	17.8341	25.7014	8.7276	88.384	20.368	10.3789	44.5771	31.2325	17.5133	34.6465	4.82357	189.706	37.7369
LPE_19:0_[M-H]1-	494.325	1.21637	0	52.624	39.5867	38.1678	78.8659	11.2124	73.3158	15.663	3.08143	40.7213	55.1997	79.6696	23.1884	19.5916	79.6915	59.2845	16.6809	77.8358	59.7811	91.9085	55.7368	55.1964	97.5867	10.5751	86.4338	122.685	50.8694	141.627	91.3891	85.3725	99.8468	31.7466	60.2681	104.607	59.1808	59.9172	24.9729	101.963	81.9	14.2305	10.2521	71.5903	56.7553	95.2626	34.8456	59.827	63.9032
LPE_20:0_[M-H]1-	508.341	1.54564	0	4829.52	4368.91	4853.15	5554.49	3141.49	5707.64	2499.45	739.513	4893.08	4572.07	5656.43	5032.69	3875.8	4721.49	4442.9	1425.15	5958.5	5028.27	6564.5	5191.73	5752.46	5981.01	1786.73	5900.84	7120.3	4058.2	6852.56	6347.73	5583.69	6225.86	3607.01	5049.2	6959.54	4673.17	5026.76	1944.5	7089.55	4924.08	2570.56	3003.33	5592.68	5109.13	5852.86	3840.27	5172.19	5854.71
LPE_20:1_[M-H]1-	506.325	2.47441	0	1569.42	1479.41	1739.02	1927.32	940.816	2069.96	840.759	214.699	1749.76	1693.47	1934.78	1750.06	1298.4	1761.52	1559.45	499.51	1868.86	1504.99	1963.32	1746.8	1866.17	1935.8	476.133	1767.22	2085.39	1183.6	2230.19	1928.53	1802.44	1816.77	1223.25	1648.16	2264.42	1488.18	1595.95	562.11	2242.98	1635.01	783.161	1050.57	1731.83	1591.92	1755.98	1212.25	1672.35	1926.65
LPE_20:2_[M-H]1-	504.31	3.64203	0	1712.02	1544.13	1989.18	2171.56	1087.04	2454.53	901.787	235.514	2009.29	1861.16	2104.38	2054.54	1430.46	1890.79	1767.43	553.172	1978.95	1432.8	2008.46	1825.08	1947.42	2158.02	467.812	1833.56	2009.75	1060.88	2424.99	2074.78	1822.56	1947.05	1330.56	1661.55	2309.03	1431.13	1718.43	538.533	2393.16	1720.53	779.74	1030.73	1784.68	1582.43	1863.89	1324.18	2359.25	2093.01
LPE_20:3_[M-H]1-	502.294	3.8036	0.3125	12.1185	3.8912	10.1736	0	3.47813	4.96572	0	0	0	3.95031	4.95369	5.65921	0	0	0	0	4.67349	0	9.0253	4.73086	0	10.3523	0	10.5015	0	5.0888	11.3628	3.1586	11.63	4.71012	6.38292	4.83647	4.88817	4.11458	3.7458	0	8.88622	4.23482	7.16893	0	0	3.83722	8.64116	0	157.275	4.05336
LPE_20:4_[M-H]1-	500.278	1.82086	0	240.581	157.621	245.358	352.712	116.82	364.237	88.2424	21.2655	156.39	165.879	317.295	192.499	161.405	301.41	350.929	73.759	313.374	202.249	365.111	388.844	299.123	358.57	81.7887	540.009	329.405	157.171	432.311	362.193	360.051	376.945	199.817	545.893	405.793	243.348	296.837	30.4665	446.948	240.61	97.5221	397.953	332.166	197.816	374.424	224.265	381.028	408.313
LPE_22:1_[M-H]1-	534.356	3.09688	0.25	0	0	4.68402	10.5727	0	5.80903	2.51369	0	0	0	0	12.2761	2.33364	5.29503	3.49227	0	37.5626	13.561	18.8477	5.97568	10.4403	18.685	0	0	35.2752	5.167	13.6867	11.9308	8.73646	0	0	0	16.0182	13.7945	9.43943	0	14.955	8.02081	3.05293	4.67727	18.0768	4.30827	4.88596	6.10579	6.45704	0
LPE_22:2_[M-H]1-	532.341	3.35551	0.3875	5.59604	0	0	6.67108	0	5.05644	0	0	5.16432	9.14908	0	0	8.92223	0	0	0	12.4924	4.25419	8.80996	9.28316	5.06293	9.51147	0	9.98785	13.8466	0	0	4.92364	3.78553	0	6.29185	7.1821	8.28345	3.56581	0	0	4.85068	0	0	0	17.9272	3.20545	4.66836	0	3.58361	0
LPE_22:4_[M-H]1-	528.31	3.72967	0	595.719	551.489	637.176	767.193	338.036	852.478	292.944	71.4029	602.413	598.061	765.977	684.706	466.701	716.123	586.522	199.071	707.467	529.917	743.547	725.165	726.859	730.088	153.839	759.652	738.402	400.269	853.976	787.216	669.281	730.058	457.965	718.669	822.788	554.405	648.967	173.813	933.618	630.564	225.739	441.892	673.685	570.977	738.75	486.427	623.513	770.124
LPE-O_18:0_[M-H]1-	466.33	2.37761	0	238.722	198.443	210.58	323.826	97.4186	335.684	61.5161	15.9476	223.913	214.35	313.371	285.106	149.817	199.5	221.101	46.9025	220.026	183.005	274.175	224.313	223.18	236.779	25.8636	285.901	342.313	140.789	326.754	279.346	213.621	168.724	105.482	202.849	244.064	133.663	122.495	41.0944	350.177	168.069	59.8925	42.5269	160.812	173.85	228.395	92.128	221.299	166.978
LPE-O_18:1_[M-H]1-	464.315	2.48505	0	489.923	254.021	308.725	501.703	225.636	452.47	171.078	36.3276	328.379	283.023	497.411	395.512	290.613	357.949	325.231	99.2487	493.661	435.909	616.386	452.014	529.116	530.155	125.65	615.306	655.8	412.491	554.691	580.654	554.303	569.37	290.178	498.874	560.756	437.177	461.634	105.568	676.286	421.168	232.672	325.268	488.362	429.809	617.706	335.483	511.824	519.916
LPE-P_16:0_[M-H]1-	436.283	1.78783	0	330.569	137.525	139.989	307.644	89.0133	270.212	79.7062	8.34005	144.205	200.296	374.57	176.215	172.789	155.392	158.909	57.7897	201.224	219.283	255.068	245.045	207.756	249.033	62.016	300.779	381.462	196	248.869	279.436	292.74	326.987	135.843	279.306	251.33	179.27	227.058	42.0112	341.225	123.067	95.2933	114.256	204.585	213.811	315.647	175.103	254.005	214.138
LPE-P_20:0_[M-H]1-	492.346	2.38146	0	102.758	77.217	83.7141	158.422	34.2083	189.168	42.0537	2.59093	96.2564	67.6758	169.181	96.493	45.346	39.4711	62.5206	25.7581	138.776	98.1143	156.955	173.817	146.702	142.339	13.3979	151.524	223.743	70.6966	172.775	165.47	151.055	101.22	57.0676	128.934	152.311	100.061	87.104	27.6826	226.099	94.683	38.8077	28.5398	119.278	85.5161	120.575	46.5727	131.431	109.001
LPG(34:0)_[M]-	735.554	2.55498	0	117.16	129.7	104.362	137.193	52.3143	125.7	42.1537	0.213641	178.631	127.074	119.433	176.123	60.6907	180.82	80.5031	10.2556	213.298	141.558	205.244	118.287	152.324	145.746	12.7595	127.755	219.243	104.913	207.761	169.455	129.679	178.526	75.4511	87.9339	207.808	116.431	153.672	23.9554	185.548	71.529	28.9994	15.2317	112.178	144.68	141.062	56.8942	92.9391	117.791
LPG(36:0)_[M]-	763.585	2.7182	0	70.8538	25.8986	19.1655	43.5854	111.357	90.3192	14.1111	13.2902	63.9739	60.353	23.4261	15.2271	65.2841	105.745	36.8815	23.4076	270.311	179.138	245.704	167.788	232.295	226.888	10.7449	172.233	477.161	133.718	205.367	125.775	221.108	305.279	73.807	168.649	341.481	113.705	223.479	11.0233	304.321	175.45	19.207	53.8547	220.141	145.761	283.211	127.608	83.9693	186.779
PA(32:0) & TG_oxid(33:0)+Cl-35	647.465	1.07334	0.0125	47.3416	0	29.7182	87.2391	28.7101	43.9375	10.9068	7.28643	22.8622	13.7911	135.907	29.3966	24.4138	28.6834	53.833	4.955	58.388	127.882	154.407	79.3092	77.2136	149.254	25.9191	129.807	248.023	143.923	120.764	111.807	151.449	161.678	43.481	79.4476	143.134	126.142	91.5251	26.9173	191.038	56.3942	49.7515	66.6957	109.334	94.9837	147.944	61.074	93.4652	86.867
PA(34:1) & TG_oxid(35:1)+Cl-35	673.481	3.12578	0	729.389	552.213	696.695	835.891	767.387	649.933	363.505	132.53	829.996	575.689	855.288	641.323	677.652	726.322	634.974	190.205	1349.75	1336.2	1600.6	1216.61	1330.85	1413.91	508.805	1317.77	1718.13	1171.69	1418.45	1459.86	1465.98	1642.34	833.497	1106.56	1528.62	1226.43	1207.33	488.903	1653.3	1043.57	851.478	1006.32	1245.59	1195.54	1505.84	990.757	1115.53	1271.81
PA(34:2)	671.465	1.81585	0	620.916	509.907	694.173	630.399	684.189	622.764	351.029	114.603	810.576	589.402	630.276	669.102	585.748	714.884	691.417	217.776	1318.41	1300.16	1620.9	1101.57	1313.02	1395.28	471.177	1260.19	1642.65	1055.02	1446.31	1418.74	1440.24	1548.61	802.32	1150.77	1507.47	1176.59	1167.24	468.752	1608.82	1129.09	835.314	940.659	1266.8	1168.2	1431.84	968.565	1139.74	1220.98
PA(36:1) & TG_oxid(37:1)+Cl-35	701.512	2.85498	0	1012.37	453.949	495.385	971.01	470.333	669.039	276.613	77.534	568.712	545.534	1035.28	510.237	541.885	483.188	437.616	159.231	984.469	1080.41	1259.78	876.63	938.56	984.629	431.115	949.183	1769.53	1235.51	1023.32	1081.49	1315.17	1249.13	568.852	829.6	1126.25	1112.95	924.649	385.981	1348.89	474.995	712.341	588.424	933.737	962.118	1275.93	749.192	885.18	974.459
PA(36:2)	699.496	1.21857	0	714.635	538.959	614.468	750.959	580.757	588.333	319.211	100.692	697.903	551.704	732.747	572.053	556.634	594.211	565.079	140.27	1269.07	1300.49	1455.16	1105.2	1156.77	1330.86	465.221	1113.65	1662.56	1128.87	1263.22	1268.89	1330.42	1436.63	758.331	965.069	1349.16	1232.98	1099.15	454.175	1470.1	777.774	770.681	804.129	1152.24	1090.91	1490.11	912.787	998.608	1146.26
PA(36:3)	697.481	2.67194	0	243.801	124.853	182.966	317.67	193.374	212.904	128.624	36.9561	282.251	179.518	192.509	184.768	180.342	229.545	997.213	69.8814	555.625	534.271	661.073	463.206	476.391	530.964	162.687	503.316	723.628	513.43	541.677	560.825	559.447	599.02	283.818	417.088	602.431	443.2	539.471	157.753	649	428.392	303.608	256.959	545.547	463.54	620.783	388.428	407.699	524.284
PA(36:4)	695.465	1.63646	0	196.953	86.3916	140.07	234.488	162.758	180.207	73.4259	4.10268	255.219	131.012	146.327	154.568	137.255	154.498	276.297	46.7021	480.333	448.238	578.313	413.359	526.108	480.56	134.397	498.968	610.671	430.541	566.753	487.453	563.534	586.62	267.716	392.46	540.334	456.587	413.629	154.393	615.841	364.182	309.468	304.587	486.284	446.255	524.374	352.745	420.068	482.443
PC_19:0_[M+OAC]1-	610.373	1.72845	0	142.365	142.725	135.983	141.988	12.7435	129.703	39.7156	8.45144	161.823	119.58	187.175	131.422	83.0758	77.1776	74.6583	15.084	43.0137	48.9615	59.137	45.6561	45.2192	76.0598	23.6705	60.5343	81.7428	12.8808	82.7508	21.5683	73.8746	75.2586	28.7735	27.5629	68.3844	27.9488	46.8731	20.2618	63.6439	38.9987	7.83588	28.3847	9.85955	50.5986	31.9366	12.2299	31.8308	50.6204
PC_19:1_[M+OAC]1-	608.357	1.73829	0	21.429	28.7206	35.1579	84.7308	10.4812	51.1967	20.2505	12.4706	26.0495	50.7996	35.3717	26.1108	21.9505	36.2986	34.2212	29.8065	52.1431	38.5959	61.9476	30.7608	47.4147	59.2213	5.86001	53.0747	59.2826	7.64659	36.6566	46.9757	33.219	67.4953	5.20498	18.8996	51.6434	22.6391	62.7232	9.20468	38.5562	17.2922	19.1522	21.7547	35.3612	29.551	71.7913	20.4416	46.1332	69.4677
PC_21:1_[M+OAC]1- / PS_25:0_[M-H]1-	636.388	1.50655	0	39.2443	58.3354	49.3596	43.4588	14.7021	53.5213	13.8194	9.3327	29.4534	59.9657	38.9517	38.8996	13.1055	39.4579	15.8685	31.1133	108.251	64.8062	72.851	77.2268	87.9951	66.0685	12.929	106.09	133.15	36.3971	84.5617	80.1482	50.0673	53.799	45.0602	53.02	140.487	44.4005	84.9618	12.4705	98.9168	50.6935	23.9402	27.3761	51.624	74.5245	74.4856	25.5917	50.7709	47.0146
PC_22:0_[M+OAC]1-	652.419	4.8958	0.225	5.9672	24.9758	0	5.50356	0	13.7951	0	0	21.8145	9.90645	33.3347	5.57907	0	0	0	5.11022	6.76581	3.46098	9.52573	5.02555	11.3191	17.1045	4.12283	4.07175	10.4166	0	18.0876	11.5625	6.50551	0	3.56148	12.8732	7.85564	4.55638	0	0	4.70952	4.04694	4.77312	2.3728	13.396	12.8702	9.52093	0	3.69289	6.66367
PC_25:0_[M+OAC]1-	694.466	3.2619	0.1375	16.2965	4.23848	11.2248	10.7972	0	0	0	0	5.22398	9.64734	18.1158	15.9441	8.77342	6.25905	4.7066	0	20.5381	8.15667	0	26.2775	14.7737	28.0383	3.17905	3.8402	4.31962	9.01716	56.6145	23.008	5.80023	26.8792	7.85665	4.37066	23.6462	4.64445	4.75346	3.57542	18.1693	4.01945	0	4.07476	8.81708	0	12.6233	5.58458	4.50309	26.5414
PC_30:1_[M+OAC]1- & PS_34:0_[M-H]1-	762.529	1.08684	0	117.686	46.8978	103.355	90.0938	192.848	88.5	63.3241	19.7899	136.279	105.127	138.831	58.9566	155.977	97.2392	132.67	33.6619	535.838	552.385	675.101	441.371	524.314	551.153	203.629	611.601	724.48	417.552	493.657	612.636	547.929	707.526	317.972	445.892	638.149	507.333	491.198	186.351	654.395	81.2436	371.961	378.243	519.582	468.193	734.223	441.518	475.651	602.182
PC_30:2_[M+OAC]1- & PS_34:1_[M-H]1-	760.513	2.27195	0.0125	17.2887	22.2191	33.1198	22.346	32.3236	32.9812	27.8327	0	17.4134	20.8286	36.8881	41.5851	34.16	14.38	18.0866	11.2077	198.972	234.16	251.083	161.454	230.469	202.206	76.3065	246.343	321.423	203.897	171.421	202.859	231.313	253.605	73.5595	158.012	290.372	205.174	146.698	58.0127	245.826	6.13225	114.026	122.569	192.835	193.202	245.393	98.167	164.458	223.847
PC_30:4_[M+Cl]1-	732.438	8.14323	0.275	0	0	0	0	4.31975	0	0	0	0	10.9961	5.58117	6.25302	0	0	4.5796	0	8.69183	12.8005	14.8457	0	4.02089	3.64985	3.28177	23.0927	13.9905	0	13.1635	15.025	4.59122	16.8114	0	5.83395	21.1699	4.77348	4.43363	0	9.03021	0	2.85928	5.28063	0	4.95678	17.9421	9.9979	6.08675	0
PC_31:2_[M+OAC]1- / PS_35:1_[M-H]1-	774.529	4.32844	0	1656.76	1573.69	1754.34	1735.25	1052.02	1732.8	832.235	272.87	1954.46	1870.86	1873.15	1988.31	1213.79	1468.11	1180.15	389.651	1464.57	1123.7	1281.57	1063.82	1152.21	1253.48	356.538	898.093	1415.67	988.709	1463.87	1207.95	1178.64	1220.53	792.91	877.856	1449.75	965.216	1018.44	451.839	1363.14	955.755	567.975	630.309	1055.95	1134.65	1217.67	847.45	879.676	1097.48
PC_31:3_[M+OAC]1- / PS_35:2_[M-H]1-	772.513	2.14236	0	563.819	583.954	643.285	627.005	402.875	562.062	288.396	88.3489	777.824	669.968	607.248	706.242	465.036	524.178	393.805	123.209	966.779	739.334	892.995	689.506	746.358	790.931	182.149	510.165	939.176	584.895	1013.48	849.771	662.215	780.842	493.475	554.758	874.092	593.486	633.986	238.458	732.862	525.065	323.755	204.737	758.027	677.402	707.694	426.269	551.845	638.051
PC_31:4_[M+OAC]1- / PS_35:3_[M-H]1-	770.498	2.24206	0	146.035	126.57	174.585	176.914	50.8291	151.484	65.4981	7.44663	200.67	140.405	183.706	224.434	87.2483	152.29	132.238	46.4392	240.848	171.348	256.539	177.634	176.521	170.041	43.7197	162.316	284.894	105.746	263.095	187.631	181.252	147.544	70.9901	142.926	220.775	111.468	146.199	47.7615	243.342	168.25	69.2051	55.4061	167.88	168.307	213.187	64.7281	103.951	136.873
PC_32:0_[M+Cl]1-	768.532	1.55641	0	1371.44	1203.51	1433.53	1710.77	280.702	1135.07	211.105	142.698	1322.21	1045.48	2050.6	1276.79	794.99	946.346	1138.55	244.045	1929.12	1602.83	2597.44	1845.56	1761.48	2506.24	363.816	2021.2	2584.97	1349.18	2698.78	2550.32	2298.48	2319.7	979.546	1742.12	2545.98	1851.83	1675.12	531.264	2604.58	1340.57	734.841	1253.83	1942.98	1684.77	2137.26	1082.78	1821.19	2144.37
PC_32:0_[M+OAC]1-	792.576	2.17645	0	394.991	196.014	206.76	297.595	396.353	414.983	149.581	78.1904	428.283	223.7	415.299	202.529	276.418	289.11	153.243	113.158	796.144	545.944	728.768	466.152	618.472	555.481	67.2625	572.177	1163.87	511.293	525.777	519.558	705.224	769.767	275.555	505.98	785.052	394.236	515.299	130.335	872.223	524.529	194.182	137.912	569.996	452.848	749.117	426.997	371.934	511.269
PC_32:5_[M+OAC]1- & PS_36:4_[M-H]1-	782.498	3.39298	0.05	15.986	5.02832	8.71913	26.7461	4.79212	17.5476	0	3.9608	5.64052	0	18.6229	11.1421	5.54397	2.80648	11.8833	0	85.4646	61.4445	119.308	50.321	110.805	58.6466	17.0394	86.8993	159.864	56.7011	58.5973	80.2252	79.4882	77.1948	10.6172	65.2513	138.777	116.403	103.623	14.2826	159.635	4.2883	14.008	0	114.197	60.155	110.449	45.42	45.3687	61.867
PC_33:1_[M+OAC]1- / PS_37:0_[M-H]1-	804.576	1.9995	0	3421.41	2492.58	2610.36	3486.92	4745.1	4869	4147.71	1135.92	3265.93	3143.79	3609.8	2430.63	3621.93	4622.85	4129.86	2213.81	5432.91	7534.62	7194.74	5512.39	6322.45	6981.28	3930.01	7334.03	7831.41	6884.12	5842.31	4852.46	7786.53	7040.8	4906.35	6427.11	6104.75	5756.06	5222.07	3064.19	8128.19	5747.71	5247.42	4220.71	4744.17	6966.16	6497.91	5281.47	4737.93	6501.19
PC_33:2_[M+OAC]1- / PS_37:1_[M-H]1-	802.56	1.7927	0	5541.18	5253.4	5525.93	5976.01	9043.48	9122.29	7881.6	2229.45	6689.13	6312.11	5918.94	5439.72	7065.17	9392.38	8130.76	4239.95	10946.7	14442.7	13882.1	10645	12926.4	13786.4	7331.27	13788.1	13911.5	11876.8	11838.4	9648.1	14431.7	13449.8	10169.1	12710.4	12576.5	10918.9	10637.5	6058.55	15887.6	12240.7	9608.78	8159.27	9585.67	12891.8	13080.3	10784.5	9165.93	12874.3
PC_33:3_[M+OAC]1- / PS_37:2_[M-H]1-	800.545	0.622994	0	400.33	441.631	406.81	459.128	391.737	487.095	229.823	66.2785	576.076	488.116	499.281	452.382	318.466	426.71	388.169	158.556	657.066	620.188	691.156	492.132	627.347	582.196	217.955	477.322	685.606	444.924	683.112	532.302	555.409	615.6	409.973	458.78	573.43	482.371	447.576	185.885	595.543	495.187	316.048	175.332	464.285	614.622	546.814	423.288	451.793	564.83
PC_33:4_[M+Cl]1-	774.485	5.00416	0.025	418.13	352.027	516.5	389.989	126.525	268.164	18.4761	76.0816	472.693	273.095	493.954	469.38	227.648	284.158	293.961	0	504.857	332.576	807.965	568.757	657.462	424.836	0	506.227	541.681	139.532	755.481	740.063	487.812	705.804	186.721	399.13	824.207	501.188	518.11	15.8382	702.727	274.678	3.52031	10.7526	615.879	358.335	777.53	310.762	420.571	554.409
PC_33:4_[M+OAC]1- / PS_37:3_[M-H]1-	798.529	0.517185	0	586.181	508.331	591.478	581.391	364.249	601.744	259.812	62.0981	579.122	567.226	594.355	626.637	440.558	483.872	404.763	103.133	615.362	502.573	630.087	488.259	556.842	522.034	147.495	405.467	673.425	401.404	633.374	596.315	491.366	522.813	304.834	447.785	657.484	401.079	487.099	164.223	568.034	385.527	237.428	197.92	487.864	466.901	531.498	370.896	417.501	471.005
PC_33:5_[M+Cl]1-	772.469	5.18661	0.05	97.1853	52.8382	122.424	62.5642	20.9332	46.0318	0	9.84256	137.457	31.0647	113.909	73.6767	18.1593	33.66	41.7945	0	158.094	111.344	304.556	191.975	247.095	114.575	0	147.168	181.442	33.1403	253.013	293.808	147.931	231.695	41.9681	87.6796	297.799	210.251	173.494	11.8038	206.159	52.7059	0	12.9449	177.269	99.8291	286.71	59.0855	103.416	184.965
PC_34:1_[M+Cl]1-	794.547	1.81865	0	6462.32	5927.38	6842.09	8422.23	1043.4	5329	919.127	673.971	6041.79	4795.89	10017.8	6568.23	3478.54	4566.93	4880.23	1063.04	9324.52	7238.05	11727.1	8992.56	8597.8	11305.5	1560.52	9248.64	11607.1	5660.39	13478.2	12862.5	10710.7	10753.2	4862.2	7967.69	11834.2	8761.18	8220.97	2622.07	12409.8	6407.16	3268.08	5765.82	9078.78	7597.61	9787.54	5083.15	8816.86	10402.4
PC_34:1_[M+OAC]1- & PS_38:0_[M-H]1-	818.592	1.96527	0	2408.95	1166.43	1131.75	1775.67	2111.79	2139.52	1029.3	447.236	2479.4	1477.46	1662.24	1332.91	1686.85	1863.91	1115.73	519.505	4109.59	2760.91	3566.74	2484.8	3163.33	2769.21	464.672	2224.05	5533.66	2456.47	2848.61	2494.07	3167.25	3518	1533.5	2635.67	4344.83	2191.39	2894.5	785.07	3930.46	2786.18	912.585	997.647	3162.81	2446.4	3588.69	2122.73	1912.96	2641.7
PC_34:2_[M+Cl]1-	792.532	1.30752	0	9896.48	10471.4	12741.6	12905.7	1973.39	9125.67	1705.94	1303.69	11132.9	8993.78	14468.4	12588.5	6166.23	8420.79	9202.27	1875.83	18530.1	13502.6	22235.2	17223.2	16878.9	22211.4	2946.42	17357.4	19602.2	9469.4	27173.7	24710.4	19137.1	20077.4	9735.26	15301	23937.4	16015.4	15782.6	4837.26	23339.8	12718.2	5879.76	11458	18135.9	14420.8	18839	10051.9	16815.6	20175
PC_34:2_[M+OAC]1- & PS_38:1_[M-H]1-	816.576	0.551082	0	3985.3	2384.53	2352.66	3031.32	4108.08	4075.17	2000.35	952.452	4993.89	2905.99	2641.28	2879.86	3217.4	3774.76	2308.56	1032.32	8028	5356.75	7155.27	5104.89	6761.53	5776.27	952.779	4638.27	10207.6	4459.55	6088.05	5286.09	6061.46	7309.97	3170.06	5593.79	8951.38	4168.48	5953.9	1612.6	7958.51	5812.51	1919.87	2073.08	6523.71	4805.37	7242.1	4234.72	3996.41	5356.52
PC_35:0_[M+OAC]1-	834.623	8.87077	0	26.8576	13.4419	30.5606	46.0572	17.1694	23.1872	19.4938	3.19838	34.2176	37.3675	49.349	12.4231	19.7487	24.192	25.6665	4.33058	137.911	51.5283	127.019	120.548	84.7198	220.166	31.4227	81.394	123.383	54.1361	219.361	222.292	148.885	144.037	55.7723	83.9922	115.304	122.712	82.4165	20.9501	189.516	71.4985	34.3111	76.7242	95.0034	70.7151	98.108	35.5223	83.8645	107.244
PC_35:1_[M+Cl]1-	808.563	8.54912	0	59.6457	39.1844	52.1239	75.0351	11.351	38.7613	12.2222	2.94584	60.289	48.0896	107.358	37.5851	24.7582	30.8469	28.6953	9.49335	154.492	97.6252	172.186	100.243	120.908	196.493	12.2925	116.406	217.944	54.0093	161.603	164.677	138.986	107.032	32.3658	76.5478	191.782	108.979	120.562	18.6784	171.099	40.5013	37.3055	31.4486	109.076	138.049	127.122	30.7883	109.474	115.736
PC_35:2_[M+Cl]1-	806.547	4.40458	0	85.3563	75.9374	125.008	67.1537	3.09093	41.426	6.0033	0.386931	101.243	66.8722	118.615	85.8862	45.1787	23.2562	6.92528	5.88189	227.321	154.328	263.035	145.874	138.888	271.691	27.3194	186.424	250.527	100.985	300.607	263.189	203.646	231.378	84.3458	157.875	295.027	161.09	186.148	19.6454	276.122	95.961	24.8816	53.4231	151.695	152.97	177.472	45.2965	147.477	234.253
PC_35:2_[M+OAC]1- / PS_39:1_[M-H]1-	830.592	1.3996	0	2715.36	2313.29	2326.38	2658.21	4174.34	4174.39	3617.17	1049.39	3106.59	2906.24	2673.71	2082.04	3241.42	4119.71	3565.38	1947.24	5387.09	6783.39	6256.47	5013.2	5899.6	6268.79	3222.62	6117.01	6597.61	5692.2	5397.23	4520.59	6509.13	6314.56	4645.53	5843.22	5866.38	5185.72	4986.22	2783.94	7139.06	5424.62	4432.37	3603.11	4518.23	6118.46	5809.79	4880.07	4197.09	5800.48
PC_35:3_[M+OAC]1- / PS_39:2_[M-H]1-	828.576	0.627583	0	949.432	833.103	852.445	892.779	1541.57	1622.08	1410.02	344.879	1170.89	1073.19	912.438	772.644	1295.06	1572.64	1404.03	728.035	1974.2	2626.44	2284.38	1838.87	2272.66	2387.34	1270.6	2358.85	2437.44	2193.36	1993.34	1629.62	2496.34	2290.67	1873.27	2241.87	2252.49	1840.09	1880.09	1130.49	2638.98	2065.62	1775.71	1410.78	1634.67	2436.67	2229.86	1913.57	1584.3	2155.97
PC_35:4_[M+OAC]1- / PS_39:3_[M-H]1-	826.56	0.642724	0	1857.7	1510.76	1487.98	1906.22	2392.63	2842.54	2288.16	601.712	1850.85	1810.23	1879.88	1395.84	2039.77	2565.24	2262.9	1217.73	3144.43	4165.11	3919.27	3122.91	3604.54	4053.54	2059.17	4021.41	4135.05	3584.13	3413.01	2790.22	4127.79	3837.28	2822.51	3853.66	3465.19	3211	3145.29	1742	4570.12	3384.81	2812.25	2309.76	2762.43	3794.95	3660.89	3071.66	2773.8	3740.01
PC_35:5_[M+Cl]1-	800.5	3.66021	0.0125	275.94	262.858	281.821	301.014	44.6497	131.909	5.65038	32.0914	258.643	148.132	385.846	262.154	119.398	88.2424	63.3415	7.32518	271.335	170.997	365.624	281.316	320.924	191.664	0	216.478	255.21	99.4663	434.405	450.233	261.723	330.269	71.3655	162.746	464.604	277.479	231.59	22.6986	340.708	132.769	6.71607	10.0763	355.076	197.979	365.47	142.581	215.961	279.404
PC_35:5_[M+OAC]1- / PS_39:4_[M-H]1-	824.545	1.40008	0	216.165	114.72	116.901	205.326	195.48	249.414	96.0157	28.4513	266.805	140.928	234.84	120.676	118.322	154.57	128.556	62.4795	451.802	409.821	540.891	375.137	443.743	390.195	141.014	399.715	576.08	369.781	434.14	402.009	460.552	451.781	243.123	343.078	475.254	383.326	368.123	148.814	536.247	190.737	231.882	171.388	398.816	380.335	514.929	286.884	334.978	425.377
PC_35:6_[M+OAC]1- / PS_39:5_[M-H]1-	822.529	7.00127	0	43.4032	34.0746	36.2747	32.9145	6.15003	39.7707	7.75447	5.58742	43.3134	46.5248	20.3942	42.3958	39.4439	14.9654	13.7632	16.9651	225.139	118.398	82.5979	61.6438	51.261	69.1431	28.9152	69.2692	211.094	66.0498	112.634	75.9671	66.9312	116.457	52.1724	41.8471	238.236	71.9539	46.3861	26.7539	80.7211	28.9927	10.2726	5.24608	163.432	79.5705	96.0333	45.9941	43.8659	56.5777
PC_36:0_[M+Cl]1-	824.594	7.19596	0	38.3284	54.7024	89.7211	94.2174	23.409	55.5016	18.1034	4.00967	56.2529	17.7297	130.72	82.2082	28.2293	25.7001	34.5189	21.5425	114.172	94.9767	120.742	104.496	99.5935	138.864	109.922	104.447	107.061	55.7086	121.673	150.008	106.503	113.771	95.7923	111.702	99.4093	79.5786	65.2505	21.7163	120.178	87.6643	106.711	39.1548	44.7239	90.3587	91.6739	53.3739	88.9385	105.557
PC_36:1_[M+Cl]1-	822.578	0.629071	0	1541.1	1113.77	1428.73	1971.36	171.563	1127.26	81.6967	79.6361	1159.75	980.938	2403.9	1246.83	573.144	762.48	948.361	175.281	1731.1	1421.01	2246.42	1595.54	1484.76	2032.42	233.608	1668.29	2443.58	1210.73	2343.24	2371.76	2107.09	1968.6	824.552	1345.46	2220.65	1784.16	1419.67	424.265	2282.53	1135.18	615.409	1022.41	1667.12	1416.97	1791.51	927.344	1614.57	1843.12
PC_36:2_[M+Cl]1-	820.563	2.28349	0	5250.14	5161.92	6132.02	6671.55	894.065	4618.97	695.184	604.188	5529.87	4423.38	7315.04	5751.08	2844.85	3917.94	4097.57	888.321	8640.65	6358.69	10061.2	7958.42	7726.33	9992.43	1229.62	7773.87	9654.35	4628.99	12060.1	11278.5	8625.59	9182.64	4462.68	6761.43	10825.8	7795.56	7264.49	2255.6	10376.2	5787.06	2710.8	4686.97	8214.68	6893.55	8646.73	4578.08	7790.36	9092.8
PC_36:2_[M+OAC]1- & PS_40:1_[M-H]1-	844.607	0.492537	0	2013.12	1063.5	1028.39	1460.17	1872.02	1853.44	851.858	392.37	2387.46	1368.95	1246.73	1335.97	1445.25	1606.86	1034.29	446.954	3712.81	2449.49	3289.77	2352.66	3040.39	2544.77	364.003	1912.25	4731.68	2080.48	2750.1	2333.39	2646.92	3245.43	1456.71	2318.82	4056.16	1923.21	2663.02	721.802	3513.67	3043.43	848.609	857.211	2985.86	2148.6	3214.49	1949.56	1790.04	2328.22
PC_36:3_[M+Cl]1-	818.547	1.18043	0	1773.82	1784.69	2194.53	2292.54	339.269	1374.8	347.112	111.364	1842.29	1392.96	2619.9	2109.37	928.509	1170.19	1386.06	181.433	2911.48	1877.32	3437.86	2583.98	2480.76	3347.66	290.936	2489.78	3114.6	1288.57	4184.71	3885.84	2899.19	3024.44	1324.17	2270.19	3691.11	2597.69	2324.68	628.425	3494.4	1668.99	709.394	1714.72	2945.98	2080.4	2853.84	1427.94	2760.55	3013.55
PC_36:3_[M+OAC]1- & PS_40:2_[M-H]1-	842.592	1.93302	0	705.716	395.824	377.189	564.988	658.26	788.758	327.166	123.442	880.21	503.47	531.617	420.774	530.634	583.649	290.011	154.49	1503.95	903.308	1273.44	953.455	1141.15	1049.18	151.634	797.556	1885.37	834.332	1025.93	880.88	1091.53	1230.79	589.567	948.588	1506.04	815.409	1014.95	265.657	1364.16	982.252	325.679	364.109	1191.53	870.244	1300.2	765.483	653.856	958.735
PC_36:4_[M+Cl]1-	816.532	2.91136	0	2912.73	2837.1	3112.94	3928.75	308.402	2484.61	266.144	286.065	2822.63	2501.25	4236.12	3058.76	1451.25	2036.1	2205.29	464.824	4738.48	3367.3	5604.3	4388.77	4112.65	5631.41	612.012	4529.34	5387.88	2502.73	6795.18	6332.86	4813.02	5022.28	2430.01	3839.89	5865.51	4357.93	4024.48	1194.38	5887.73	2986.31	1472.56	2916.76	4606.57	3622.98	4747.29	2462.11	4440.6	4999.03
PC_36:4_[M+OAC]1- & PS_40:3_[M-H]1-	840.576	0.261365	0	1149.49	595.075	532.476	860.162	994.58	1169.92	557.014	218.864	1214.84	742.664	709.392	688.08	811.226	902.951	522.624	279.278	2124.17	1424.84	1820.79	1337.46	1715.8	1460.89	211.581	1230.41	2778.9	1157.72	1562.7	1358.1	1636.7	1883.71	789.305	1392.95	2305.77	1051.26	1549.34	352.264	2009.54	1571.72	481.508	433.756	1636.75	1193.92	1833.83	1088.5	967.666	1321.42
PC_36:5_[M+OAC]1- & PS_40:4_[M-H]1-	838.56	1.13289	0	726.622	474.272	638.198	712.009	781.265	638.752	377.486	175.818	721.128	528.987	891.263	570.396	669.179	614.877	605.938	216.64	1429.78	1500.97	1744.29	1295.86	1363.78	1569.05	640.058	1512.68	2014.09	1376.39	1485.87	1603.52	1727.69	1743.62	871.039	1380.2	1753.22	1466.25	1324.94	578.493	1879.48	192.391	993.78	1098.35	1368.65	1370.28	2067.76	1238.75	1360.35	1488.9
PC_36:6_[M+Cl]1-	812.5	7.88307	0	504.697	476.163	518.91	528.555	275.406	483.82	211.993	74.351	661.654	522.58	559.708	567.215	325.762	442.276	342.962	120.555	532.228	382.455	468.582	347.753	423.377	466.087	49.9712	305.894	539.335	316.046	586.745	449.8	341.127	433.418	178.864	346.35	494.264	249.403	288.379	119.626	451.715	262.913	122.954	121.435	340.324	318.299	402.88	201.498	274.861	344.103
PC_36:6_[M+OAC]1- & PS_40:5_[M-H]1-	836.545	1.49574	0	629.278	511.462	641.467	597.119	657.707	601.612	309.719	131.843	611.551	464.926	726.54	575.212	674.049	508.586	585.095	194.1	1413.83	1389.1	1646.22	1228.99	1351.25	1500.09	592.412	1472.76	1890.9	1324.9	1365.6	1560.13	1495.36	1648.87	863.859	1379.92	1657.58	1355.68	1230.38	561.84	1729.61	315.419	948.316	1060.65	1380.33	1327.32	1945.76	1137.16	1246.71	1398.51
PC_36:7_[M+Cl]1-	810.485	8.05845	0	42.1648	29.1541	29.7643	40.8711	17.2837	46.3243	21.5001	5.10231	70.2527	55.248	51.2164	58.2775	14.5356	50.5148	57.2678	13.2437	78.1851	34.7352	30.1707	41.5392	37.3254	16.053	3.65544	42.5843	70.5622	24.9185	65.1884	82.8477	26.5155	39.5304	17.7016	60.0102	54.2909	15.3055	41.4846	4.4593	39.491	12.9323	16.4144	18.9635	61.3772	45.9624	53.3283	38.2123	22.0634	14.0224
PC_36:7_[M+OAC]1- & PS_40:6_[M-H]1-	834.529	0.434377	0	1002.4	688.126	917.171	898.498	931.117	854.586	399.982	216.982	923.398	705.419	988.865	718.78	920.13	731.264	743.307	245.795	1994.54	1954.74	2331.61	1770.81	1964.37	2123.32	864.042	2210.85	2622.11	1891.04	2085.29	2274.88	2162.92	2337.25	1231.2	1926.3	2356.73	1964.52	1867.36	755.546	2377.56	234.197	1358.47	1516.99	2037.05	1812.41	2830.21	1689.39	1699.48	2064.57
PC_36:8_[M+Cl]1-	808.469	8.24604	0.4125	0.23698	0.113973	0	0	0	4.76022	0	0	0	0	2.96553	0.197881	4.54557	6.34849	3.88116	0	16.0639	5.27296	14.9993	0	5.54042	4.42617	2.86471	5.89454	7.65326	1.79056	0	4.98911	7.80929	0	0	0	0	0.152457	4.93556	0	7.66197	4.61197	0	0	4.77411	4.48282	4.78134	0	8.72815	0
PC_36:8_[M+OAC]1- & PS_40:7_[M-H]1-	832.513	1.78976	0	606.167	333.04	393.466	462.415	97.4857	385.02	17.0396	40.4265	536.053	275.982	586.628	398.49	194.871	257.11	241.161	31.4191	984.864	615.165	1153.19	787.292	977.235	567.582	43.7185	660.811	1025.85	373.169	858.747	933.251	736.85	1075.11	298.674	599.229	1206.93	882.049	930.005	146.42	963.351	34.5852	108.68	100.79	1045.68	636.374	1410.11	659.704	631.67	729.471
PC_37:1_[M+Cl]1-	836.594	8.97538	0.175	6.27366	8.30775	4.04046	0	4.48483	5.66369	0	0	16.3161	0	5.05432	0	0	0	0	0	4.9125	12.4599	10.3056	7.48866	5.27647	10.9164	6.33459	0	9.10239	9.55111	6.71837	4.27425	15.1347	9.82705	0.0772794	0	9.56442	22.3387	0	6.55078	14.7549	0	4.44874	115.888	3.70322	6.42286	23.4867	4.60723	4.12634	16.8692
PC_37:4_[M+Cl]1-	830.547	8.32283	0.0125	18.1694	3.94511	0.520996	3.86019	18.4949	39.9993	16.1566	4.39994	10.3533	31.9341	11.5972	6.23494	38.1989	37.5202	0	28.213	166.629	107.335	69.9277	57.2332	109.825	53.8989	7.36308	17.221	169.319	52.5099	73.015	60.9524	38.0693	97.1589	63.8837	64.2658	155.371	22.3122	84.4861	9.78014	126.391	67.6176	27.0791	36.5774	96.0706	70.4235	107.012	35.0651	21.6778	87.9869
PC_37:4_[M+OAC]1- / PS_41:3_[M-H]1-	854.592	0.239269	0	972.323	664.391	566.897	933.67	1228.18	1493.08	1200.51	269.266	893.819	902.84	1064.93	600.575	995.461	1262.89	1056.51	624.582	1603.47	2202.8	2045.56	1641.3	1985.57	2131.58	1113.88	1951.8	2367.85	2104.71	1772.64	1409.38	2346.36	1956.23	1481.65	1873.6	1766.61	1695.93	1636.15	914.908	2455.06	1797.39	1566.17	1101.86	1381.39	1995.85	1931.86	1585.18	1386.17	1917.94
PC_37:5_[M+Cl]1-	828.532	6.70788	0.0125	13.7703	24.3088	5.33167	15.3296	9.83886	23.1168	24.4516	3.4636	6.08523	5.53455	16.708	21.0052	0.0627367	12.7563	0	13.2286	25.9686	46.6973	30.9823	18.6529	35.9506	47.0152	2.85522	19.2422	35.6516	21.2861	65.1497	13.2014	13.2651	51.692	13.2416	22.3478	36.7518	19.0699	13.498	0.808728	22.042	0.316051	14.0073	0.074253	18.206	24.8984	55.9831	15.2601	16.8799	6.40171
PC_37:5_[M+OAC]1- / PS_41:4_[M-H]1-	852.576	0.559039	0	264.487	147.107	172.451	237.496	335.004	480.764	331.72	44.7601	235.36	203.11	275.187	113.194	296.626	345.271	278.968	196.515	474.945	667.82	658.52	552.799	604.304	614.383	324.217	678.171	683.3	579.497	557.659	468.514	718.269	653.735	447.959	652.495	596.341	504.044	492.295	237.931	799.248	529.485	460.674	300.786	442.231	586.53	596.029	543.499	443.658	603.53
PC_37:6_[M+OAC]1- / PS_41:5_[M-H]1-	850.56	0.499289	0	249.863	224.144	195.762	308.831	404.518	486.436	378.012	82.9487	282.816	302.958	329.485	165.52	329.843	423.683	374.677	221.695	599.442	810.503	754.022	634.122	733.947	752.524	360.863	750.798	780.176	752.82	640.522	498.344	849.015	800.338	499.568	797.954	694.855	620.573	630.377	304.563	912.851	612.365	550.844	383.91	545.724	748.026	727.576	604.149	572.479	722.852
PC_37:7_[M+Cl]1-	824.5	8.05551	0	424.058	304.189	278.166	384.605	39.1431	233.324	41.7212	20.2705	211.587	292.852	661.369	303.177	152.617	202.726	211.041	87.2604	223.967	162.531	292.698	166.335	201.518	285.108	45.4567	202.785	265.537	111.815	281.253	314.667	274.411	306.876	138.044	136.466	252.375	211.56	207.892	70.544	278.136	87.4283	100.378	154.928	194.346	185.736	256.263	113.249	154.783	205.084
PC_37:7_[M+OAC]1- / PS_41:6_[M-H]1-	848.545	8.82835	0	44.9571	36.6453	71.9599	112.677	99.4339	170.564	25.233	11.0472	60.3837	68.8084	110.497	128.217	89.7298	142.054	82.4283	17.7371	86.8207	51.7172	52.2929	3.25931	76.2079	105.309	9.20174	28.3805	96.4631	39.0432	59.0697	90.2858	69.9272	86.3436	17.3033	28.5635	99.7337	46.3853	38.0497	5.45196	120.067	100.633	13.3569	4.83628	58.6963	47.0063	77.01	25.7086	17.8196	87.2035
PC_38:1_[M+OAC]1- & PS_42:0_[M-H]1-	874.654	8.66342	0.0125	103.096	45.4721	68.5286	50.9388	0	85.3389	25.2995	8.99191	106.795	59.3931	84.1087	46.6828	30.4312	70.1563	38.9762	19.461	171.738	101.33	277.301	183.366	172.969	183.292	59.4771	153.808	206.043	112.633	294.462	239.258	188.425	208.391	71.0661	193.219	267.402	182.252	115.467	31.8465	234.658	68.3524	103.032	520.929	214.72	107.219	182.093	64.4768	118.07	232.624
PC_38:2_[M+Cl]1-	848.594	7.58018	0	49.7048	47.7062	35.9359	49.8304	129.17	101.682	128.569	19.9374	96.9326	28.4778	53.6191	19.7573	98.974	39.6448	117.397	65.6255	258.599	394.423	173.638	73.9707	150.066	198.591	335.296	154.169	267.254	339.271	77.7029	72.8056	127.498	192.944	205.791	195.532	205.922	196.918	145.583	139.759	169.777	220.155	313.113	71.1112	145.109	338.401	139.372	140.839	80.7326	122.463
PC_38:2_[M+OAC]1- & PS_42:1_[M-H]1-	872.639	3.48427	0.025	29.7723	30.478	0	29.103	24.3355	0	15.8038	9.23059	22.5444	8.24104	25.9039	20.0522	14.911	10.9702	12.2571	4.12266	83.254	46.279	61.7037	24.7258	32.7695	18.0529	2.24842	48.9229	93.2781	29.1731	56.032	55.0114	38.4053	39.7288	12.7202	37.7493	65.9132	29.7806	40.0104	9.86745	95.6437	21.6872	13.9139	10.4255	31.4689	39.3794	57.0788	39.4502	16.6677	35.3421
PC_38:3_[M+OAC]1- & PS_42:2_[M-H]1-	870.623	2.27711	0	146.768	66.1575	30.295	82.7503	95.3129	71.5119	54.6423	22.4317	176.643	73.7848	76.683	25.6986	48.4583	48.3522	23.2455	13.8162	252.355	182.021	175.652	103.498	176.713	124.803	8.85559	126.169	391.431	150.888	155.041	193.202	204.949	172.547	50.5369	125.139	307.254	63.2045	227.805	32.943	291.751	200.427	25.3055	24.3078	157.663	133.488	267.653	87.9708	127.144	154.706
PC_38:4_[M+Cl]1-	844.563	1.6399	0	1812.71	1634.84	1754.77	2458.56	84.8133	1445.61	100.474	97.5137	1576.25	1314.27	2796.91	1780.36	753.017	1083.26	1068.85	214.941	2528.27	1782.08	3064.29	2344.38	2246.3	3035.87	242.629	2356.7	3001.95	1409.69	3728.95	3407.78	2802.41	2838.84	1215.61	2064.14	3221.64	2350.58	2140.05	581.389	3323.98	1617.02	718.16	1371.96	2445.8	1940.36	2533.5	1262.06	2535.03	2712.14
PC_38:4_[M+OAC]1- & PS_42:3_[M-H]1-	868.607	2.23058	0	664.104	265.448	223.087	476.371	519.898	598.342	229.553	72.8698	625.428	344.902	464.778	394.138	425.762	428.02	191.99	122.949	1121.02	774.955	1028.24	708.978	938.945	769.774	59.9103	617.261	1567.09	695.204	842.787	727.861	875.266	988.797	394.741	727.216	1203.18	603.058	794.499	172.172	1167.18	760.621	234.459	209.671	888.321	654.277	1022.54	581.651	586.955	687.755
PC_38:5_[M+Cl]1-	842.547	3.29952	0	451.977	382.407	439.246	631.943	155.146	213.22	143.323	6.90652	284.51	292.133	793.182	325.116	182.22	149.136	202.206	34.6242	542.529	408.12	760.554	589.569	576.259	702.524	67.8989	585.024	726.177	282.508	892.429	899.292	697.719	668.279	322.992	522.505	747.928	547.376	534.294	106.325	815.414	269.702	130.411	252.419	623.603	429.59	604.598	268.412	679.743	651.2
PC_38:5_[M+OAC]1- & PS_42:4_[M-H]1-	866.592	1.37464	0	161.439	41.7273	6.37865	79.2235	103.349	90.9584	24.7471	11.8423	92.2254	41.0475	34.8989	54.0636	86.073	64.9821	12.6526	21.4996	300.243	183.563	337.853	208.249	282.51	233.105	32.3145	148.714	478.031	211.94	195.118	137.209	274.473	286.192	90.5594	146.206	379.742	140.321	242.04	40.4983	372.984	199.924	46.4895	24.1832	256.961	153.135	279.339	118.182	157.564	192.75
PC_38:6_[M+Cl]1-	840.532	3.66583	0	447.784	433.815	491.4	642.9	32.2628	382.309	19.1612	25.5056	454.79	411.819	770.764	537.29	206.505	275.909	369.219	62.9834	850.974	620.176	982.169	767.191	774.028	1065.68	72.4202	855.798	901.487	422.327	1236.81	1179.6	856.946	906.469	428.588	665.74	1058.71	738.384	731.158	213.587	1129.85	426.738	215.48	529.94	868.169	623.03	857.772	424.64	811.558	967.992
PC_38:6_[M+OAC]1- & PS_42:5_[M-H]1-	864.576	3.58257	0	125.416	39.8602	25.6441	73.5744	106.687	118.552	12.5825	12.5597	176.06	53.9109	42.067	35.3735	42.2376	86.1796	10.2746	9.34048	368.743	214.053	289.731	235.951	225.75	271.144	73.3867	151.352	478.29	195.351	256.005	154.399	272.685	291.67	67.8167	248.618	434.628	146.386	269.231	67.3741	378.179	213.636	45.4754	56.2199	245.747	159.783	379.366	153.618	133.983	179.917
PC_38:8_[M+OAC]1- & PS_42:7_[M-H]1-	860.545	6.12403	0	20.2341	31.2728	18.6957	24.1344	39.3576	50.2439	53.2064	11.7508	40.6898	34.6473	43.9095	29.876	33.9262	38.5767	21.5101	47.7103	108.432	74.353	96.8464	57.4725	64.6689	73.966	40.6029	80.1371	110.963	72.5806	88.2467	63.4205	77.0283	83.5129	35.8477	50.4487	100.03	101.52	92.4917	25.1851	119.155	30.7381	40.0637	43.9072	89.8061	70.9037	194.43	51.103	64.4907	59.3812
PC_39:0_[M+OAC]1-	890.686	3.03454	0.15	40.587	0	4.4952	0	7.05884	35.3996	0	0	56.8075	0	0	0	5.31953	12.6306	0	4.65242	109.809	27.9204	91.6076	26.7891	29.4461	20.3506	2.74005	21.0182	33.109	2.60584	0	10.002	21.0536	39.0854	8.94751	29.1749	69.6339	21.0293	91.2461	14.1998	30.0363	24.3718	7.53036	6.25145	66.1376	38.3032	49.0078	47.4285	4.64223	17.4606
PC_39:4_[M+Cl]1-	858.578	7.59395	0	28.4802	0.620423	22.9612	19.2898	43.2002	31.9919	9.37905	12.7046	39.4928	17.0439	17.0758	30.912	28.8124	17.5413	24.8869	13.0499	190.972	109.156	77.7844	96.6611	148.939	108.889	41.835	96.8472	160.524	47.5565	72.3785	57.3398	129.032	74.7181	41.6602	119.206	144.878	51.0586	87.0693	13.0428	189.447	88.1295	26.5246	9.508	58.0934	95.7412	129.549	45.0169	40.0095	88.1452
PC_39:5_[M+OAC]1- / PS_43:4_[M-H]1-	880.607	2.67101	0	86.0387	137.025	135.845	140.998	93.2331	156.815	161.142	27.4325	72.4649	93.3445	152.328	138.359	94.9658	111.745	115.125	102.242	213.452	283.277	271.969	190.686	208.149	355.343	251.443	293.454	343.833	326.338	199.154	202.992	349.463	257.733	219.62	287.407	206.041	226.799	197.136	131.36	335.275	164.379	335.056	122.848	160.082	283.923	262.694	146.603	203.589	243.559
PC_39:6_[M+Cl]1-	854.547	8.51913	0.0125	13.3331	24.4375	14.0314	71.9782	18.4647	26.6527	12.6355	0	33.7597	33.3561	40.6786	44.5544	15.4087	21.0334	30.9415	5.2417	44.8275	30.9752	50.971	37.8157	33.7802	48.5866	11.7031	27.504	83.1254	18.8166	53.8792	55.2512	34.5896	51.2563	17.2542	24.1531	38.8452	68.7153	45.5652	11.5212	78.4769	36.5314	9.99181	0.0608171	32.4987	30.5405	60.2384	12.1717	19.376	48.2944
PC_39:7_[M+OAC]1- / PS_43:6_[M-H]1-	876.576	8.37206	0	13.4554	3.5363	3.80276	13.8135	13.4717	37.6417	17.9109	2.94468	12.034	7.23607	8.82812	11.8654	15.5273	18.3637	11.4291	10.4564	9.61646	42.459	36.6813	17.8907	3.74968	22.0296	37.5656	29.326	42.4859	42.6295	7.50564	18.1887	37.698	24.6554	41.9515	8.87385	27.2574	13.4089	20.2226	14.238	37.8193	86.3734	12.1524	13.4746	16.869	44.2209	23.435	26.8054	10.339	20.8538
PC_39:8_[M+Cl]1-	850.516	8.47868	0	50.8992	86.8557	107.307	94.9539	53.3705	50.381	10.8023	28.275	86.9618	82.0499	100.292	92.9074	65.5451	42.1207	25.0978	18.07	150.873	310.572	285.279	252.886	295.375	269.262	164.497	308.546	221.423	200.506	207.416	211.985	248.103	323.48	267.276	302.813	226.87	136.389	182.312	141.639	362.72	283.784	268.817	119.791	137.95	321.569	267.948	241.321	175.461	272.538
PC_40:0_[M+OAC]1-	904.701	7.42985	0.025	114.978	7.91103	0	5.75609	2.76581	60.824	2.48613	8.42914	58.0739	14.5026	3.5048	0	12.2625	33.8018	9.67751	11.4929	136.683	86.7881	91.0884	70.3832	77.6626	35.0305	67.2663	39.3307	101.789	62.4322	25.8813	19.0635	47.7029	88.2189	20.2941	61.1643	127.027	71.4431	105.678	18.6034	54.4843	30.4681	48.8912	10.9035	85.6875	87.0138	91.0142	26.5266	5.65026	32.9419
PC_40:1_[M+OAC]1- & PS_44:0_[M-H]1-	902.686	7.21512	0.0625	8.80183	8.21306	0	7.89361	0	13.6054	17.4479	4.69751	10.7662	9.20684	0	0	7.04579	5.14085	12.4636	10.2581	104.524	139.333	54.763	32.5989	39.5698	48.575	116.815	47.4274	131.861	140.94	22.5084	14.7064	39.5246	34.7885	35.3922	44.0405	80.3762	46.016	51.4484	57.3103	71.9418	28.4658	96.2331	0	50.4903	99.8008	57.4494	41.0792	23.5193	39.4027
PC_40:10_[M+OAC]1-	884.545	8.64923	0.025	9.19165	5.3965	10.0393	38.7421	0.207776	37.7792	2.37982	3.30623	14.0634	12.0324	78.7748	0	8.59457	11.4616	12.6296	5.2364	38.2183	28.0371	41.8758	28.8791	109.506	53.9178	2.97642	54.5022	38.8015	15.4336	22.028	27.7797	63.288	139.601	5.26116	16.3654	48.7769	38.7573	30.876	11.2024	125.835	18.8436	8.12115	0	50.1842	30.4951	65.7613	60.0452	38.1719	81.633
PC_40:2_[M+Cl]1-	876.625	6.79452	0.175	4.30283	0	3.41925	0	5.53103	0.0449136	4.1377	0	14.5039	0	0	5.23474	6.03917	0	0	6.23054	28.4056	29.5314	0	16.2735	16.0251	5.18448	26.223	15.4957	29.4084	44.2623	18.7914	0	12.9877	5.11413	7.30202	14.8427	20.1115	4.3005	0	6.4964	4.77912	269.272	23.9684	65.3289	7.21784	20.7164	17.927	13.9133	10.6039	8.96075
PC_40:4_[M+Cl]1-	872.594	7.62525	0.0125	25.7047	5.24836	0	24.3956	24.4814	32.9961	47.4069	20.9853	16.7154	18.1827	43.9092	6.08834	7.17967	18.0228	6.69231	29.7898	115.387	172.194	78.8949	55.2164	78.2837	74.6456	153.686	142.426	71.971	142.524	61.0842	39.8178	97.774	120.026	125.54	79.5366	119.351	79.8865	117.701	41.3081	75.9756	93.635	169.664	43.2376	79.2226	140.506	79.3663	79.4198	39.6949	63.853
PC_40:5_[M+Cl]1-	870.578	8.54461	0	37.3776	17.8043	27.9414	85.8215	100.008	32.316	86.2573	8.13939	49.2994	40.5743	76.4486	10.6921	24.5492	46.4362	29.7903	67.4067	97.9224	277.724	105.829	62.82	110.566	109.388	220.496	99.3761	102.893	227.017	77.2856	46.7472	113.297	94.8316	128.985	105.212	136.25	113.325	108.815	94.502	133.588	107.296	191.146	16.8657	48.2811	189.363	94.7781	88.8345	54.3444	65.2284
PC_40:6_[M+Cl]1-	868.563	2.87978	0.025	76.8722	83.6982	84.557	197.093	0	22.5819	0	3.20879	79.4702	118.954	155.312	80.7585	25.2312	30.9924	32.8507	7.33152	251.329	159.035	290.277	205.839	187.522	320.819	23.0602	156.024	284.452	138.444	439.241	312.574	244.167	226.228	62.1417	156.52	331.349	167.771	138.643	22.1767	294.953	82.7545	31.4894	36.5548	209.052	160.185	230.549	62.9065	223.513	262.14
PC_40:8_[M+OAC]1- & PS_44:7_[M-H]1-	888.576	8.00579	0	53.8941	25.8353	39.9077	36.4324	17.157	19.4738	10.127	8.34921	32.8912	24.4749	18.125	31.6676	3.58458	18.9901	54.2218	5.11479	57.1653	41.6008	95.7396	121.201	44.1151	69.3012	13.3092	80.282	51.2877	47.0964	172.147	107.339	53.9773	69.4929	21.2269	37.2668	71.1383	67.5786	71.0536	5.64778	257.895	32.3105	27.3884	428.16	40.1661	19.8638	71.1757	24.7607	59.7768	67.8225
PC_41:0_[M+Cl]1-	894.672	6.15714	0.45	0	0	0	0	0	0	0	0	12.1553	0	0	0	0	0	0	0	0	3.43878	14.1382	13.2836	11.9301	0	2.44517	6.46352	2.35264	0	8.40325	5.19616	4.00807	0	0	5.3661	10.2341	0	16.43	2.85191	5.05471	11.198	0	287.713	6.42889	4.14478	1.95811	0	0	5.06914
PC_41:5_[M+Cl]1-	884.594	7.63062	0.2125	0	3.6376	0	0	14.5673	0.0754336	0	0	5.50401	0	5.52317	4.42286	5.10092	0	0	0	20.494	5.40301	26.2156	13.3605	15.2433	0	4.53681	0	25.6377	0	4.78257	3.10612	26.4387	5.80371	9.3939	13.443	27.9089	19.4762	15.7045	0	29.5413	101.029	4.61147	12.2423	10.8288	0.00295764	6.78228	5.24485	0	0
PC_41:5_[M+OAC]1-	908.639	6.97664	0.025	66.5372	76.917	175.171	123.192	34.8058	38.5543	0	18.3491	109.706	51.6686	192.075	127.184	52.137	42.3728	71.6742	0	153.959	123.528	269.775	180.813	217.697	201.901	14.7882	166.329	142.104	59.5788	312.759	345.176	197.782	226.922	74.399	136.595	293.149	172.26	178.657	9.24834	236.604	84.5489	8.3281	35.1558	208.372	143.053	206.625	89.6564	188.959	218.505
PC_41:6_[M+Cl]1-	882.578	8.76459	0.075	7.46412	10.7833	8.9799	12.1756	3.48669	5.61208	0	8.76681	16.8364	16.8337	41.245	10.974	0	0	0	0	19.3144	29.5094	65.7003	29.783	44.8694	54.3192	22.9221	42.4512	31.3367	26.8988	83.0486	89.1844	32.6467	31.02	24.1718	52.7435	68.134	28.6945	44.3705	8.12885	48.1553	689.318	8.77541	0.0087249	45.3073	40.431	47.1444	13.745	32.5829	56.7547
PC_41:6_[M+OAC]1-	906.623	8.31658	0	111.472	190.819	277.198	227.023	119.699	85.6529	95.267	44.0953	206.044	155.624	215.032	247.772	146.631	111.894	118.662	8.78968	279.805	246.636	370.641	285.267	415.519	309.917	120.499	184.675	285.168	135.04	482.902	479.202	271.528	390.341	186.364	214.976	435.656	287.295	279.584	58.6873	363.002	182.689	101.918	95.0311	307.3	280.913	320.981	167.292	239.551	322.423
PC_41:7_[M+OAC]1-	904.607	7.6442	0	32.4975	17.4098	63.6138	33.6849	39.0738	34.8609	15.7041	3.63694	55.3687	27.6739	42.5225	51.3174	17.0265	25.2516	68.4848	6.32244	89.0232	47.4042	154.911	123.411	103.767	100.021	36.6323	63.8697	58.2449	31.7984	161.299	117.159	93.9909	98.0034	40.3431	67.7677	122.715	77.3359	63.6022	12.1674	138.735	128.738	25.7821	120.582	92.4064	76.3968	92.6126	27.1858	63.3253	106.849
PC_42:10_[M+Cl]1-	888.532	7.61228	0.0875	0	10.696	4.33251	7.69401	2.62142	2.5955	0	3.74627	0	9.34469	0	4.42587	0	0	3.9311	0	27.8601	14.1275	17.009	11.2213	24.025	10.4538	7.07249	19.1048	27.5605	8.75852	50.59	20.5339	16.8737	36.3301	13.9569	12.7944	39.3643	32.4406	18.4238	2.00581	23.6146	13.1775	7.04692	15.7804	31.0442	29.3115	25.1115	12.6024	27.8352	21.7682
PC_42:11_[M+OAC]1-	910.56	7.73271	0.2	0	0	0	0	0	10.7336	0	0	7.56271	0	0	6.47592	4.51773	6.02607	8.55212	0	12.763	3.46713	11.6423	9.52349	8.99846	5.19883	2.98931	15.8237	17.9078	3.90789	13.7155	7.41013	13.051	18.3934	0	11.6597	16.2603	13.724	11.0091	2.86996	0	123.335	0	0	5.05357	0.048547	5.67651	4.77863	4.71307	9.62814
PC_42:2_[M+Cl]1-	904.657	6.46463	0.475	0	0	0	0	3.97757	11.5956	0	0	4.34052	0	4.75558	0	0	11.1045	0	0	13.3891	0	6.29837	9.81116	5.64752	7.78657	0	0	0	7.51153	0	12.6596	3.13112	5.1983	0	0	0	0	5.56049	3.69703	6.98659	20.2908	0	29.9974	7.45782	12.5652	0	5.09465	6.982	4.62248
PC_42:2_[M+OAC]1-	928.701	2.6905	0.1	9.13168	16.0331	0	0	0	22.8217	0	0	11.3484	17.0669	0	0	5.06498	0	3.69617	11.1468	115.26	57.2051	85.9451	14.9413	103.404	44.3274	16.0156	85.5815	117.921	58.8176	48.3262	21.6913	90.0311	100.388	21.5161	70.6364	146.503	30.9735	63.4042	18.575	80.5777	47.1162	46.5481	5.94393	37.312	67.1714	77.7261	44.613	18.4472	66.3925
PC_42:5_[M+Cl]1-	898.61	8.06663	0.025	14.8158	8.41754	20.0683	9.47542	30.8729	42.3714	20.211	8.24914	13.0986	8.76547	10.8358	16.5979	31.6086	0	0	14.4712	67.1377	90.5918	16.4001	15.0086	33.8905	21.9761	59.1161	48.2209	84.9123	76.9048	11.0376	12.1008	29.6128	57.4738	23.9542	18.7032	32.5904	44.227	48.1551	19.3242	37.4789	55.1434	53.857	15.2848	4.93747	51.8288	30.0784	28.8802	16.0181	14.7587
PC_42:7_[M+Cl]1-	894.578	6.72943	0.0625	5.43507	4.14073	0	5.08597	9.86567	0	4.01352	2.95386	5.10464	0	0	5.68588	0	17.7291	7.2216	6.20522	40.2339	39.6452	18.863	10.5796	24.8773	49.6953	25.5283	10.5796	23.1091	34.9564	15.5551	13.5407	50.1978	14.8998	8.66982	17.0359	19.7188	28.4014	4.00509	15.4715	46.2134	12.779	21.6881	22.0291	29.0276	20.36	17.9654	9.09601	6.95832	26.2137
PC_42:8_[M+Cl]1-	892.563	8.16026	0.0125	25.7895	29.4846	63.1887	74.2744	2.58639	14.9854	4.80258	0	43.3751	35.8407	56.1557	50.049	6.79124	22.27	13.3464	5.48592	66.3887	48.6728	119.708	99.2774	93.5359	103.199	30.4754	105.634	64.8039	43.7396	194.594	134.536	68.7622	143.834	43.2596	86.0625	86.1995	93.8705	106.4	24.7167	193.462	50.3331	19.0969	236.472	44.9979	85.4761	138.532	25.5058	61.5597	113.487
PC_42:9_[M+Cl]1-	890.547	8.85551	0	13.6211	18.6841	19.6638	7.38552	25.1638	39.1813	46.7225	5.08184	15.3051	10.8945	33.4445	20.7282	7.5127	38.1718	26.0616	10.8548	54.051	34.4946	225.136	112.584	45.3958	178.433	4.80992	145.352	103.49	33.1079	287.634	195.072	86.4746	117.834	34.407	57.1392	82.0089	126.298	91.7706	12.7805	270.051	55.0954	21.3227	581.193	61.1984	27.8573	109.484	31.8509	63.5357	119.314
PC_43:0_[M+Cl]1-	922.704	6.69195	0.0625	15.0958	4.06246	3.78245	0.240945	5.82508	5.15665	8.53697	4.66892	0	4.99623	0	0	5.19652	0	5.78424	0	30.6934	64.3375	59.0636	32.4657	7.54588	9.58298	39.4861	3.46336	20.3748	50.3362	50.7338	30.1968	20.539	46.9192	11.1432	9.69793	30.0234	19.1779	15.562	12.4746	65.7132	6.23075	3.52003	13.8889	22.5103	37.0491	30.7149	18.2125	0.154957	21.4259
PC_43:2_[M+Cl]1-	918.672	7.60498	0.1	18.715	0	14.9713	0	3.30618	14.1058	0	0	13.8411	0	0	11.7042	0	6.65535	7.89064	0	19.7884	17.7317	33.9545	10.8142	20.7635	15.5252	2.77047	27.2521	37.0181	6.99267	42.7903	32.9128	10.3353	24.5241	8.48753	1.81655	50.8865	36.3734	29.5933	6.60623	56.2741	22.0046	1.9296	35.0276	28.8048	18.0669	41.9676	2.80035	4.04614	26.6488
PC_43:2_[M+OAC]1-	942.717	4.23864	0.1375	0	0	5.45221	0	5.78483	0	0	3.78656	0	4.27036	5.94404	12.5826	0	0	14.9175	4.84867	60.4064	28.6351	17.2902	24.0376	29.1026	25.9762	11.2531	8.57895	56.8095	23.2079	18.6256	14.4689	33.2903	14.5381	12.9159	41.2341	52.4324	4.45811	26.9798	0	46.0595	7.60494	11.8711	458.293	3.17876	33.7494	30.9976	25.267	9.38693	25.3268
PC_43:4_[M+Cl]1-	914.641	8.22839	0.275	5.3842	0.087623	0	0	0	4.93985	0	0	0	4.96269	0	0	5.42026	0	4.49165	1.84195	4.51046	4.20082	5.58742	10.2967	7.04054	4.06702	2.98627	4.29969	4.82652	0	4.88506	4.95812	9.40431	4.45125	0	5.06525	5.54504	8.91491	0.313894	2.3334	9.14958	64.5272	0	58.0089	0	4.81256	0.0292501	4.98952	0	10.0453
PC_43:4_[M+OAC]1-	938.686	5.54566	0.2125	3.25684	0	0	0	0	0	2.31877	5.01906	0	6.69243	0	5.1119	4.55516	0	0	0	11.2904	8.37424	9.26141	23.5357	0	10.707	3.35156	7.97413	13.5377	21.5768	0	4.6221	24.4112	21.6455	4.9856	8.71991	14.3885	8.15853	13.9737	2.3364	9.40802	11.8917	7.86163	12.1946	8.74136	11.1991	10.3404	5.06684	0	5.0875
PC_44:1_[M+Cl]1-	934.704	4.95747	0.0375	11.8809	9.96075	4.38329	6.05572	16.717	6.80711	10.8614	2.61767	12.525	5.13951	0	0	5.62834	31.4665	14.6817	0	41.833	43.9708	27.6501	25.9781	36.9608	31.207	46.8042	47.6583	55.586	48.1495	15.6965	23.3107	31.935	53.4761	27.0274	42.8917	12.8563	23.188	34.7292	17.7079	38.2387	25.167	71.6649	5.55998	26.3262	33.5366	31.6434	31.6786	4.86953	23.5739
PC_44:10_[M+OAC]1-	940.607	7.83863	0.25	3.67927	0.00147914	0.0165302	0.130437	8.31465	0	0	3.57035	0	1.90055	0	0	0	0	0	0	2.15255	2.81261	3.61635	12.0435	0	4.96494	0	8.6816	1.99015	3.86946	21.8675	9.35564	6.66741	9.18143	0	0.00093611	9.2934	11.8379	4.36833	0	23.0358	5.51413	0	330.284	0.10733	7.92207	3.23899	0	5.73893	11.8379
PC_44:12_[M+Cl]1-	912.532	7.47882	0.25	0	0	3.72321	0	3.2487	0	7.82196	0	5.77353	0	0	0	0	3.29611	0	0	2.88589	7.65478	2.57178	5.5953	2.64403	12.9899	0	3.09719	0	0	6.76043	15.266	16.5803	9.0462	3.67368	8.91762	0.0151343	14.792	11.0087	7.80713	11.4831	3.18925	6.71529	0.942411	18.6724	0.0196486	6.39877	4.44278	4.10012	6.90328
PC_44:2_[M+OAC]1-	956.732	6.02912	0.275	5.69436	0	0	0	0	0	0	0	0	0	0	0	5.89256	0	0	0	32.2293	5.98453	26.4397	10.7227	9.55712	3.59516	0	0	24.2349	14.3379	5.79967	0	14.3365	21.5449	9.28419	10.298	51.0068	10.2414	21.7492	4.31462	28.4983	11.1548	9.06642	3.96063	15.1299	24.1604	12.3103	26.4799	0	6.09248
PC_44:3_[M+Cl]1-	930.672	8.51535	0.1625	0	4.36469	4.55993	0	2.61209	0	8.35693	5.14769	5.17981	0	0	5.90784	0	0	0	4.57082	14.1539	11.6717	28.9503	33.1295	8.54952	10.6082	0	9.0334	25.9781	0	46.2226	29.0765	13.9097	8.86405	12.958	2.86435	12.6775	19.2389	24.2504	0	63.8837	15.9146	0	32.0915	22.1778	8.15574	27.3508	4.32413	7.47372	4.37084
PC_44:4_[M+OAC]1-	952.701	5.83459	0.425	0	0	0	0	0	3.11186	0	2.04101	0	9.4502	0	0	0	0	0	0	0	4.70008	0	0	5.11309	3.64199	0	6.55006	4.51452	8.13071	3.15783	0	4.45973	5.91027	0	0	19.2853	0	12.9747	0	12.5012	3.59635	4.00113	9.21051	8.93408	0	8.45691	5.36411	0	4.76252
PC_44:6_[M+Cl]1-	924.625	6.46138	0.2625	0	0	5.57993	4.66541	6.97188	7.33201	3.59691	0	0	3.59406	5.32515	0	9.41708	3.90653	0	0	0	0.131331	9.3956	5.39046	4.71082	3.45994	0	7.26596	4.43191	6.35712	2.70738	6.5371	0	8.59861	0	6.36013	0.0942279	3.00184	8.48949	0	4.52712	80.3398	0	0	3.50025	8.23768	0	3.24308	6.88063	9.69072
PC_48:1_[M+OAC]1-	1012.8	0.760272	0.0125	26.4078	4.96283	9.19338	13.895	37.134	158.214	13.9382	0	70.4388	16.17	59.8889	21.482	71.8885	267.747	66.0795	27.7219	311.354	216.013	370.399	206.299	247.556	260.627	32.6965	225.078	348.626	106.185	153.521	135.345	269.895	388.762	167.859	274.383	330.725	96.3437	258.772	34.1001	361.513	401.379	119.548	34.6928	244.814	144.562	331.556	297.677	102.026	227.701
PC_52:4_[M+OAC]1-	1064.83	2.14264	0.225	13.2434	0	0	7.03958	0	16.6354	3.04258	0	6.57004	0	0	5.67605	5.14733	16.6211	5.87166	12.14	11.7066	4.66721	21.9659	12.0487	28.7737	17.1148	4.23345	9.76681	48.0598	0	5.81075	23.193	32.4044	44.9953	8.71646	33.2465	0	0	12.1728	3.69159	41.4851	40.059	13.382	0	17.0829	4.76357	28.7579	21.5494	15.514	23.5821
PC-2O_34:0_[M+Cl]1-	768.604	7.01869	0.1125	6.29898	8.8259	8.74798	15.1894	0	0	0	6.87758	7.93929	10.3592	18.9061	0	0	0	0	0	54.2394	47.4313	35.2148	53.1983	31.0489	59.8771	0	4.65728	56.6541	14.8102	57.7438	18.3635	33.6732	31.1404	4.00637	23.708	52.9738	30.5681	23.5774	7.14101	51.9616	11.9844	10.1668	3.47812	31.9781	45.6899	61.227	20.2719	17.5394	20.264
PC-O_16:0_[M+Cl]1-	530.302	3.65447	0	1049	961.567	1511.98	1546.2	385.805	1192.67	225.659	217.047	971.932	826.288	1576.5	1331.78	659.146	973.965	1818.39	230.586	1260.22	909.924	1863.86	1520.26	1232.43	1784.89	208.818	2290.05	1357.2	517.372	2149.15	1931.88	1578.06	1674.5	858.866	1789.84	1774.85	1331.38	1484.38	233.878	2466.42	934.788	364.287	2659.6	1568.46	907.002	1402.47	837.229	1452.95	1882.69
PC-O_18:0_[M+Cl]1-	558.333	1.98393	0	458.643	423.125	649.26	706.035	67.1886	497.012	24.399	50.2097	427.972	350.287	643.455	522.889	248.146	405.722	719.896	99.6116	701.484	446.881	1030.56	779.786	657.97	971.39	80.1122	1204.76	706.688	252.797	1136.52	1036.08	806.398	911.447	410.386	951.742	938.519	680.227	752.036	125.937	1252.84	509.211	163.999	1253.12	862.635	486.269	768.902	392.197	729.937	949.188
PC-O_18:1_[M+Cl]1-	556.317	1.59704	0.0375	33.4477	39.5229	83.2668	107.968	0	57.2435	0	3.5555	27.4047	55.1633	94.9596	58.2722	30.1722	32.0299	126.495	8.23787	129.742	68.7757	257.848	185.344	81.8789	219.37	9.99551	304.959	121.487	27.5545	328.468	257.506	169.2	167.938	94.843	225.095	227.384	139.999	130.932	12.1792	349.887	90.1255	0	315.23	175.018	98.7361	110.482	96.2808	169.426	258.153
PC-O_28:0_[M+Cl]1-	698.49	7.85266	0	35.7895	13.9978	8.14979	21.6806	24.6576	34.6112	2.87849	11.6993	39.2129	13.0926	50.651	28.6658	40.6093	34.5012	115.163	3.79452	152.174	159.271	177.352	103.203	123.729	182.768	13.7273	129.219	188.878	111.249	150.842	138.006	178.848	180.147	71.1033	82.7473	151.818	128.179	68.4486	42.2369	148.867	78.6543	54.0937	55.8436	134.351	123.89	199.939	82.1564	112.56	142.754
PC-O_32:0_[M+Cl]1-	754.552	2.86262	0	144.988	63.6731	23.0504	146.666	7.17098	64.2031	2.68403	5.61532	19.7597	48.2682	129.944	21.4766	20.226	22.9179	20.0294	4.73177	78.1875	107.713	178.527	83.5995	92.615	150.662	9.62549	107.965	255.873	91.7155	173.749	161.761	201.144	125.873	30.984	70.5564	160.445	127.655	71.3275	15.9992	166.393	38.719	18.6704	16.9461	71.8408	105.77	97.3533	26.8133	63.8224	87.4247
PC-O_33:1_[M+OAC]1- / PS-O_37:0_[M-H]1-	790.597	3.29498	0	75.3116	18.5644	0.224115	48.3407	31.4487	72.0003	71.6204	10.963	15.4404	66.1137	22.0594	6.76887	25.1417	37.4323	37.1408	69.9215	89.0407	149.161	141.69	87.9486	85.9151	180.146	71.8194	172.604	230.234	218.843	98.649	64.0499	228.824	130.926	74.3049	129.37	84.5804	130.114	91.8382	33.8148	180.701	67.0368	95.6446	80.6921	76.7193	140.924	134.012	61.1159	64.4507	98.6835
PC-O_33:2_[M+OAC]1- & PS-O_37:1_[M-H]1-	788.581	1.82289	0	62.1248	10.1286	3.912	23.4311	13.7529	46.7523	42.9188	7.0297	33.6912	30.2495	19.9108	16.2175	21.4754	11.9661	28.3603	24.8944	66.1564	125.93	100.565	30.0701	91.8516	81.9634	56.118	93.0736	167.091	140.255	33.7753	71.4028	146.596	131.547	52.027	92.3315	71.3061	82.6637	61.4147	19.6764	110.899	50.1984	108.71	51.2096	19.6699	95.032	68.3868	46.6876	36.7844	76.2557
PC-O_34:0_[M+Cl]1-	782.584	3.83878	0.0375	37.2922	8.40147	6.09291	23.9902	4.96209	3.73078	5.45028	0	32.6173	18.6571	16.9831	22.6037	3.81962	0	5.59194	0	36.2308	23.1466	52.1167	12.433	8.97319	39.9612	6.03975	19.8984	87.4203	30.9359	61.3564	59.7809	41.4621	40.3669	5.19562	24.3305	57.5487	19.6198	37.2602	8.71123	64.2418	4.85352	6.58922	5.85824	32.1545	13.451	43.6855	3.16168	32.9353	32.3624
PC-O_34:0_[M+OAC]1-	806.628	7.63828	0.2	19.9687	14.3263	0	38.0516	0	10.3082	9.40597	0	5.70338	15.6855	18.7895	0	0	6.19892	0	0	0	0.248997	20.595	0	3.85099	4.77605	0	5.11157	9.24454	13.6008	6.32804	0.0968263	0.581726	0.203409	3.58239	4.94865	0.0438032	4.88263	8.10731	0	23.2047	0.167643	0.205231	17.6878	0.102996	4.38636	7.15263	0	0	0.297183
PC-O_34:1_[M+Cl]1-	780.568	1.31795	0	369.517	217.89	164.802	450.525	50.6149	253.618	36.5869	20.2875	194.92	193.3	437.377	125.809	105.316	122.727	140.865	55.8979	382.405	379.272	539.287	371.565	333.119	461.653	53.4129	437.751	596.706	350.004	499.431	444.314	586.9	449.643	179.999	346.07	459.203	436.232	373.506	100.548	516.368	255.628	163.79	195.34	387.864	334.665	437.931	228.615	352.889	445.9
PC-O_34:1_[M+OAC]1- & PS-O_38:0_[M-H]1-	804.612	6.09479	0	34.9965	25.5691	5.97252	13.2122	5.73505	22.6145	7.24905	7.30765	34.8246	13.2384	19.4429	14.2743	15.5875	24.083	38.234	10.914	58.0758	56.3463	42.1393	36.9811	34.2679	48.6607	10.9109	66.1007	115.721	40.4521	40.2939	36.1501	83.0493	87.1052	20.0046	51.3744	88.8744	23.2086	72.9163	7.85291	68.7913	36.7423	25.3082	78.9878	52.2446	37.5265	64.132	17.6765	29.99	52.7749
PC-O_34:2_[M+OAC]1- & PS-O_38:1_[M-H]1-	802.597	4.24092	0.0125	18.7293	5.4875	7.13285	17.3213	12.0457	8.70376	5.25704	8.28359	4.5007	2.42861	4.7172	3.34152	15.3387	11.5122	9.27178	0	26.7463	20.5143	49.4481	11.5185	45.6724	22.2273	3.21615	7.86932	125.542	39.2892	22.3144	14.1733	53.0976	24.9368	6.87985	24.6753	27.1758	22.3739	26.9922	6.53787	49.4757	41.7808	4.28042	7.43647	37.8793	38.9438	47.7573	9.12223	7.83615	14.3008
PC-O_34:3_[M+OAC]1- & PS-O_38:2_[M-H]1-	800.581	6.16583	0.0625	4.60449	20.022	4.3925	4.82082	0	5.76035	2.71082	0	19.9922	4.03943	6.09461	4.57132	18.1214	0	0	0	86.0412	52.6217	70.338	28.0409	53.0922	23.4768	11.4939	20.5475	135.237	39.7303	31.7796	18.1763	66.4625	40.27	21.2768	23.0265	65.5198	36.7848	51.4973	15.278	83.1387	125.49	8.81472	10.3595	66.9023	23.5444	49.8885	30.2722	22.0855	52.631
PC-O_35:2_[M+OAC]1- / PS-O_39:1_[M-H]1-	816.612	4.65643	0.05	0	4.58858	0	9.93435	7.62113	25.6711	20.3478	0	3.91162	5.09708	5.73534	3.13336	0.0781511	6.22122	0	18.9764	0.141979	27.8698	20.5412	5.4889	5.14682	29.1663	4.53235	0.00040722	54.2907	61.2807	0.153662	12.5285	82.2491	13.2249	2.89882	17.7298	5.90243	9.99089	14.2899	0.000122292	29.1417	6.37027	4.23433	10.3115	14.5307	17.4067	12.1428	0.0605585	25.4529	10.1377
PC-O_36:0_[M+Cl]1-	810.615	6.07221	0.4125	0.276077	0	0	10.7139	0	8.09626	0	0	0	5.74861	0	17.2824	4.37978	0	0	0	0	9.6665	3.68046	5.16955	0	9.04647	0	5.25717	23.5369	2.85235	0	5.36146	7.31066	11.1492	3.95351	0	5.37122	16.8377	5.92738	3.92074	11.6647	0	0	232.96	0	4.17418	16.2387	3.96275	0	0
PC-O_36:1_[M+Cl]1-	808.599	5.60469	0.075	6.33939	5.21807	0.237303	25.1975	0	0.445373	0	0	6.35897	0	21.3752	11.2343	0	5.63236	6.45575	0	18.6695	11.2622	25.4297	5.23909	12.0557	46.2509	3.03888	13.8093	28.763	43.4991	19.523	25.3352	62.727	11.0898	1.59517	13.409	19.3197	34.3557	19.3298	14.0314	50.2276	4.72494	4.16246	331.578	11.8164	22.1368	32.5696	5.57969	9.87915	8.95805
PC-O_36:2_[M+Cl]1-	806.584	2.24558	0	125.556	126.377	127.909	287.397	191.72	224.514	147.43	45.0409	117.748	149.553	277.153	99.0054	147.883	178.027	145.639	92.3914	263.611	388.144	432.189	374.347	392.681	345.033	160.496	393.394	450.882	370.404	436.457	316.554	484.674	437.121	200.801	317.09	309.095	364.543	387.78	128.563	514.597	210.759	346.481	212.029	242.12	293.514	346.761	219.936	301.665	397.361
PC-O_36:2_[M+OAC]1- & PS-O_40:1_[M-H]1-	830.628	8.32954	0	12.5287	8.64075	12.1436	27.4615	3.65538	37.3113	26.9953	2.07408	22.4737	22.2583	24.5288	12.1756	8.47309	12.2608	651.528	16.2007	56.9025	55.72	59.3628	37.3114	50.0887	67.4791	17.5359	43.1264	67.4386	32.2871	41.9782	37.0316	47.5425	49.4205	40.5413	61.9045	47.0162	50.7084	49.5373	28.8209	61.3553	68.28	38.3333	149.087	34.2564	58.6231	24.7813	23.9383	16.7897	38.3508
PC-O_36:3_[M+OAC]1- & PS-O_40:2_[M-H]1-	828.612	6.21974	0.3125	5.24673	0	0	0	0.0202404	7.91216	0.122504	0	0	0	0	0	0	3.82208	0	0	0.242913	4.09046	10.9296	2.71258	3.52996	0.0340722	2.28323	3.61824	14.4467	4.44353	9.424	0	5.91646	4.60251	4.53354	3.20217	0.0430096	7.32992	0	0	11.0774	12.9699	0.168122	2.93917	0.0253897	8.45462	5.43787	5.27258	2.57634	0.0313378
PC-O_36:4_[M+OAC]1- & PS-O_40:3_[M-H]1-	826.597	6.77174	0.0875	19.15	11.0351	0	12.3186	6.38647	19.3413	0	0	0	13.6094	5.02271	4.44203	4.73537	0.18005	5.38522	0	42.9169	28.4671	25.9392	8.62453	22.2029	22.4974	0	17.8858	107.117	20.5394	22.9625	23.2733	44.6796	31.3783	0	27.9394	47.2277	12.3615	23.3667	14.1338	43.5817	39.8629	4.52999	10.5422	23.9409	11.644	25.5945	9.14484	20.9534	9.79859
PC-O_36:5_[M+OAC]1- & PS-O_40:4_[M-H]1-	824.581	6.96078	0	326.113	254.443	285.904	483.409	23.409	132.452	7.45357	6.34491	196.196	122.499	598.247	291.561	95.5037	80.187	161.451	14.2597	344.556	346.167	528.248	320.783	261.751	473.919	33.2296	432.322	541.173	208.639	545.661	588.82	566.94	482.088	119.32	314.967	530.395	407.499	325.287	84.0793	518.031	158.868	102.991	184.272	342.504	327.741	425.102	195.135	351.999	390.756
PC-O_37:0_[M+Cl]1-	824.63	0.836427	0.0125	105.502	172.188	265.383	294.501	4.75223	111.095	0	7.8511	105.151	139.854	422.271	226.932	102.252	86.9799	164.682	6.311	328.582	255.155	505.638	339.241	289.725	472.991	3.40335	415.265	458.415	194.271	514.982	504.645	477.387	418.538	166.265	262.943	507.986	292.516	282.846	75.965	507.843	163.431	90.3198	213.652	336.775	304.218	412.734	137.123	349.145	382.263
PC-O_37:4_[M+OAC]1-	840.612	4.3104	0.05	5.05991	7.92256	5.08601	12.001	0	0	0	0	4.12145	12.9342	15.3147	18.7244	5.10878	4.68167	0.00720237	5.57421	29.5993	33.8592	34.1536	31.3385	12.1699	44.4734	3.51714	24.6262	51.7084	80.9553	17.8344	14.1536	68.357	39.4666	6.09241	38.1031	16.611	15.5761	13.3289	5.60963	64.7374	23.8761	22.7903	549.693	16.7227	14.9613	25.7553	6.78477	10.1213	17.1878
PC-O_38:2_[M+Cl]1-	834.615	6.75911	0	26.8576	13.0893	18.5401	46.0572	17.1694	23.1872	31.032	3.19838	20.8442	24.3219	44.8303	4.34849	20.6014	24.192	23.1564	10.419	68.8484	48.6284	89.0572	55.262	47.9212	93.0645	31.4227	81.394	66.1434	56.8158	85.635	93.4317	127.716	78.7398	40.1556	52.6152	61.5323	73.1558	82.4165	20.9501	120.138	43.3388	32.3682	24.9435	61.5531	52.1608	61.2011	38.4252	27.16	55.5333
PC-O_38:4_[M+Cl]1-	830.584	8.35256	0	2715.36	2313.29	2326.38	2658.21	4174.34	4174.39	3617.17	1049.39	3106.59	2906.24	2673.71	2082.04	3241.42	4119.71	3565.38	1947.24	5387.09	6783.39	6256.47	5013.2	5899.6	6268.79	3222.62	6117.01	6597.61	5692.2	5397.23	4520.59	6509.13	6314.56	4645.53	5843.22	5866.38	5185.72	4986.22	2783.94	7139.06	5424.62	4432.37	3603.11	4518.23	6118.46	5809.79	4880.07	4197.09	5800.48
PC-O_39:0_[M+Cl]1-	852.662	2.02894	0	506.182	474.91	747.122	580.067	46.4425	443.462	17.5492	5.21283	582.39	422.564	727.588	591.849	343.312	371.547	426.231	56.9494	869.26	771.196	1081.97	871.736	780.585	1096.13	111.141	829.747	1087.25	495.588	1294.33	1178.39	895.784	969.265	401.075	771.04	1198.01	810.535	714.13	203.961	1158.88	573.262	303.991	530.339	842.112	752.69	918.211	484.073	784.681	973.23
PC-O_39:1_[M+OAC]1-	874.691	8.2815	0	190.588	89.4883	220.843	202.615	188.294	343.401	79.5385	52.5939	223.3	112.011	232.963	241.238	364.725	349.651	214.8	32.4074	492.034	355.323	375.148	263.369	280.986	613.65	40.0216	231.437	622.578	294.856	244.711	536.327	271.575	817.739	121.936	253.633	469.619	237.8	279.034	103.013	802.512	288.222	100.031	160.624	327.976	286.359	426.084	174.389	191.596	554.115
PC-O_44:4_[M+Cl]1-	914.678	7.09652	0.0625	5.4775	13.9816	5.91606	0	10.2287	18.6124	49.3854	4.667	50.1166	0	0	0	22.9894	41.069	42.0054	15.0546	134.947	107.968	150.403	66.0896	126.672	80.2599	42.5557	107.827	157.407	65.5454	89.8683	45.0907	126.061	166.099	86.3544	114.709	161.269	88.2848	133.876	42.0791	182.489	94.1107	66.772	0	39.4782	108.144	106.102	91.6909	43.5387	136.563
PC-O_44:5_[M+Cl]1-	912.662	6.99876	0.1	20.2573	14.9603	0	0	0	6.69123	3.96149	0	31.1714	5.45061	7.0849	0	4.71707	10.0713	0	0	83.8765	32.8599	75.1227	40.2668	20.5291	45.4718	11.8887	32.9225	75.5465	15.0767	63.7449	47.3429	49.8808	87.9828	10.6437	44.0735	62.2518	61.4042	75.0729	20.5607	45.8886	6.01768	2.83231	0	99.9909	35.7289	89.466	22.544	11.6366	39.8876
PC-O-30:1_[M+Cl]1-	724.505	7.80015	0	588.064	310.368	449.679	662.444	412.068	442.246	177.97	73.1832	492.663	392.196	732.526	395.815	442.917	360.478	398.066	97.0754	1064.24	1084.57	1308.52	921.424	1002.48	1052.97	374.125	890.907	1525.07	1008.4	1092.52	1127.75	1147.69	1246.66	593.52	843.315	1244.37	1022.54	950.142	405.58	1307.57	350.151	661.708	648.994	1045.32	1056.9	1412.35	891.733	902.709	981.093
PC-O-31:0_[M+OAC]1-	764.581	3.48379	0.05	13.1916	0	5.21557	2.9007	0	11.9199	17.0201	2.55116	0	5.40694	6.27123	0	4.29825	6.33662	5.53064	14.9089	21.6512	75.5767	24.3612	14.0064	8.32371	30.2012	16.5964	6.55747	91.278	76.4025	5.02855	4.42419	115.782	54.7902	20.6907	24.2483	24.8422	18.6094	17.2229	12.7096	55.4222	14.4731	23.021	20.1354	7.10767	16.2435	11.4366	7.61279	6.56792	5.09637
PC-P_28:0_[M+Cl]1-	696.474	7.84058	0.0125	5.50175	7.53325	7.48768	34.7201	18.1762	6.12745	7.46785	0	34.5142	23.0465	54.5313	10.4279	16.531	6.28734	61.2187	10.388	137.83	131.053	161.221	137.967	112.989	167.896	30.9084	123.667	226.61	93.1059	162.176	130.321	149.835	174.902	52.0934	81.7394	141.199	120.101	63.0857	12.0288	175.794	87.995	49.8617	38.8592	101.117	109.738	173.709	66.575	111.848	130.366
PC-P_31:1_[M+OAC]1- / PS-O_35:1_[M-H]1-	760.55	1.80655	0.0125	39.6549	46.6884	55.2561	37.0114	27.6557	21.6863	14.4504	0	73.2169	31.4985	10.8335	72.6839	5.00282	11.6569	25.3656	4.90689	123.55	78.9688	67.7683	71.6824	54.7836	100.669	17.0194	18.5293	148.942	101.636	106.456	71.6809	59.1923	101.628	35.3894	23.567	117.727	64.6509	79.5333	29.6365	131.28	54.0703	25.7176	8.50879	37.561	109.138	44.2257	15.9697	21.6109	64.7486
PC-P_33:2_[M+OAC]1- / PS-O_37:2_[M-H]1-	786.565	1.30313	0	360.706	327.683	381.469	417.942	282.768	342.761	223.797	30.156	438.494	396.799	350.657	428.156	202.221	298.593	230.675	64.5505	730.007	666.061	646.569	492.322	646.221	647.669	153.618	424.655	753.624	502.036	718.503	594.43	571.086	612.905	364.682	431.81	758.003	518.426	536.967	211.796	724.799	519.344	297.693	171.5	535.354	595.831	598.272	439.891	489.705	578.988
PC-P_36:5_[M+OAC]1- & PS-O_40:5_[M-H]1-	822.565	8.45981	0	1452.05	1457.17	1760.97	1917.91	189.654	1254.89	121.785	124.078	1479.31	1300.56	2403.9	1639.61	805.389	1049.46	1133.12	201.547	2331.05	1687.58	2721.94	2153.32	2152.19	2771.61	320.743	2110.29	2649.19	1291.9	3405.66	3106.79	2453.35	2501.13	1195.56	1828.78	2992.54	2074.14	1906	577.948	2967.01	1586.29	722.545	1210.52	2347.7	1738.87	2364.15	1208.5	2240.56	2515.19
PC-P_41:0_[M+OAC]1-	902.722	7.77036	0.075	0.0952641	7.05331	0	0	0	6.39715	16.622	0	14.5598	12.3465	0	0	13.5977	2.7648	11.7649	8.2785	94.3126	131.041	41.3781	30.8796	38.1254	27.9109	96.0999	30.9781	78.0181	117.351	27.6174	24.4925	50.3747	40.7661	35.2622	36.4833	68.2327	55.3685	62.1491	47.0783	52.1184	38.7365	90.8529	3.93582	33.1601	105.875	88.2167	59.0385	21.0096	20.5985
PC-P_42:4_[M+OAC]1-	908.675	8.42714	0.175	3.19067	4.08143	0	0	0	0	3.70653	0	10.1044	0	0	0	0	0	0	0	29.4952	17.7324	34.6523	21.9465	5.3835	4.40135	4.65829	11.7877	16.651	4.23405	9.66221	2.36221	13.4414	22.2316	4.9542	8.93842	12.8804	31.186	22.2053	7.29973	29.4628	0	0	10.5506	33.6528	20.7315	15.7923	18.8216	15.2513	9.15111
PC-P_42:6_[M+Cl]1-	880.599	8.17625	0	86.0387	71.6622	57.4437	90.3232	93.2331	156.815	161.142	27.4325	72.4649	93.3445	141.696	37.0676	94.9658	111.745	115.125	102.242	213.452	283.277	271.969	190.686	208.149	355.343	251.443	293.454	343.833	326.338	217.56	206.773	349.463	257.733	219.62	287.407	206.041	226.799	197.136	131.36	335.275	306.077	335.056	122.848	160.082	283.923	262.694	146.603	203.589	243.559
PE_32:0_[M-H]1-	690.508	2.46577	0	327.775	309.45	415.984	337.565	247.582	286.204	111.871	29.392	443.3	267.51	446.646	350.398	249.914	296.788	200.038	70.9856	626.992	594.267	668.955	524.203	593.57	665.215	121.295	484.225	803.895	485.57	758.105	687.568	666.968	672.651	291.27	479.386	764.701	510.056	504.321	193.048	699.369	491.398	252.705	214.258	586.041	571.537	673.347	371.356	423.305	570.614
PE_32:1_[M-H]1-	688.492	0.508357	0	64.0128	45.2421	65.3619	21.7066	71.8249	62.227	17.5296	2.98981	115.837	45.4347	120.446	11.3469	57.0584	90.149	79.6965	28.116	256.069	314.533	299.047	173.558	184.227	271.131	39.1719	160.129	337.41	201.982	279.075	247.944	216.465	297.955	135.213	209.883	278.745	183.175	181.443	74.7048	270.811	159.832	103.514	56.805	152.747	256.724	272.644	145.164	143.387	210.212
PE_33:0_[M-H]1-	704.524	4.36708	0.0875	10.3319	0	0	0	16.9227	5.83596	6.93075	0	25.9142	11.2618	11.2832	12.3531	5.51662	0	0	0	13.297	16.8208	16.5169	17.2669	9.85195	28.184	3.5348	12.5146	25.7323	22.524	10.7114	16.4809	11.7516	5.98248	16.1155	4.40443	27.1544	24.6303	22.7678	4.52735	37.6481	12.8134	3.31913	65.3118	13.7853	37.3289	17.6052	4.95508	12.9222	13.4025
PE_34:0_[M-H]1-	718.539	3.20964	0	2690.91	1980.81	2029.81	2686.85	1224.8	1868.78	798.364	284.847	2599.23	1937.6	2989.32	2091.08	1643.29	1574.66	1286.02	413.952	3142.65	3084.31	3451.42	2369.86	2715.06	2837	701.733	1911.01	4344.98	2797.08	3343.67	3188.11	3093.06	3138.41	1463.56	1722.41	3490.64	2596.35	2410.19	1082.61	3336.76	2148.48	1289.23	997.386	2663.94	2865.8	3068.6	1860.7	2330.31	2414.41
PE_34:1_[M-H]1-	716.524	1.60497	0	4978.1	4249.44	5679.1	4925.06	4081.21	4794.12	2402.54	1083.04	6219.06	4266.99	5760.24	5116.93	4573.11	5252.09	4844.83	1423.04	8009.19	7700.01	9697.96	6851.32	7344.76	8624.88	2678.72	7018.84	9982.94	6254.65	8949.84	8749.91	8464.64	9125.74	4560.1	6921.2	9470.21	6864.36	6674.35	2727.44	9448.75	6186.74	3858.59	4826.5	7224.32	7165.98	9388.74	5582.87	6192.9	7543.39
PE_34:2_[M-H]1-	714.508	1.45088	0	2096.73	1667.25	2041.24	2014.4	1521.86	1820.49	929.766	395.313	2298.42	1689.56	2344.86	1933.94	1616.37	1956.4	1827.93	568.225	3072.93	2916.23	3687.43	2770.62	2882.2	3482.13	1082.28	2804.31	4036.76	2498.46	3375.93	3414.12	3275.35	3543.06	1823.95	2878.44	3708.3	2749.16	2671.02	1057.5	3687.94	2381.66	1526.02	1921.1	2940.24	2817.47	3719.43	2204.64	2647.12	3023.03
PE_34:3_[M-H]1-	712.492	2.73687	0.075	20.5349	13.4077	6.50727	6.29842	0	6.28916	0	0	12.2583	0	29.2817	5.89896	0	14.7155	12.2697	0	44.421	45.9832	77.7876	48.6409	45.6282	79.1881	4.13025	15.0326	96.3883	24.378	47.3879	87.235	55.6623	61.2132	24.6441	42.2833	76.6169	48.0624	21.1028	6.57349	89.1051	42.9371	15.7459	20.6946	57.8493	40.6838	71.1339	28.1007	47.3848	53.6861
PE_35:0_[M-H]1-	732.555	6.04892	0.0625	25.3262	13.2104	10.6175	29.9431	28.0973	14.1111	0	3.11698	22.3257	9.17494	28.7166	5.71225	27.3644	6.79786	4.85261	0	49.2455	41.0033	31.6634	12.1375	20.6193	11.9376	5.47334	5.27783	47.8088	28.4612	16.8429	46.6751	14.424	32.8062	3.33685	6.76419	54.9853	21.2635	15.5795	4.06821	27.8288	18.2268	0	5.89727	12.5884	24.0706	24.7303	4.39255	0	35.7205
PE_35:1_[M-H]1-	730.539	2.17457	0	136.896	62.481	107.574	103.024	90.8978	64.8134	29.7844	9.14546	112.693	109.802	132.737	110.032	43.4169	67.3572	57.3042	26.1428	248.81	274.705	299.71	173.031	174.462	212.995	40.4167	105.485	344.902	209.079	273.696	230.296	205.338	258.188	54.1425	106.437	317.457	233.619	189.475	51.1828	269.681	106.346	50.3909	33.4951	198.131	218.985	268.782	95.0946	118.077	149.846
PE_35:2_[M-H]1-	728.524	1.73467	0.0125	30.6636	49.9576	87.4762	41.7935	22.6973	63.9903	9.68347	0	74.6658	68.8594	76.3243	24.0539	22.2298	30.8674	34.2135	4.83143	209.024	179.947	163.726	102.697	167.789	150.557	29.9385	64.2311	204.308	105.469	215.567	93.8497	190.923	172.911	54.9138	46.8257	270.274	118.227	119.938	58.1521	231.915	99.8034	44.4851	10.6272	129.854	147.924	184.261	58.8893	109.077	106.939
PE_36:1_[M-H]1-	744.555	1.45673	0	13511.2	9679.35	10046.3	13112.7	6142.49	9955.87	4224.32	1679.56	12217.8	10079.4	14697.8	10327.1	7538.09	7778.34	6297.12	2209.61	15605.2	14636.7	16352.3	12000.8	12972.2	14015	3539.06	9324.22	20562.1	13187.6	16579.8	14668.3	14557.3	15009.1	7407.49	9117.93	16917.8	12941.4	11370.2	5003.73	16043.1	10477.6	6707.68	5328.28	13156.9	14287.2	15047.1	9245	11313.2	12275.1
PE_36:2_[M-H]1-	742.539	1.57435	0	21651.4	19196.8	20401.9	21830.3	11933.1	17792.4	8146.54	3074.14	24591	19583.7	23667.6	21533.5	15027.9	16026.7	12534.7	4116.42	33771.4	29401.9	32933.4	25066.5	27813.3	28989.2	6673	19024.4	38959.5	24326.8	35046.3	31253.8	27007	30408.7	16559.1	18793.4	36581.8	26339.6	24165.6	10612.9	32077.9	23072.5	12554.2	10947.1	28076.5	28699.1	31400	19016.2	22901	25461
PE_36:3_[M-H]1-	740.524	0.61764	0	2295.21	1718.3	2178.6	2121.74	1429.77	1922.52	917.38	377.813	2320.11	1830.81	2505.61	1998.07	1720.54	1963.26	1795.76	538.816	3179.5	2803.35	3520.37	2778.61	2837.82	3324.56	992.572	2825.1	3968.68	2506.75	3445.72	3464.54	3228.01	3395.55	1839	2694.41	3609.57	2777.29	2621.85	1108.07	3713.72	2359.82	1456.15	1921.38	2894.62	2756.26	3583.28	2178.02	2509	2891.8
PE_36:4_[M-H]1-	738.508	0.900464	0	2677.33	1787.18	2344.28	2438.39	1573.14	2265.54	1074.76	464.567	2526.14	1822.14	3009.33	2136.59	1890.14	2123.78	2152.62	704.817	3126.31	3088.04	4007.87	3008.85	3029.67	3688.13	1216.59	3274.43	4473.81	2878.38	3601.16	3583.74	3893.19	3870	1879.58	3362.22	3790.59	3071.94	2866.87	1125.28	4057	2431.78	1759.26	2161.19	3015.9	2885.31	4116.28	2380.17	2800.4	3215.9
PE_36:5_[M-H]1-	736.492	1.6276	0.025	55.3638	29.2609	5.42601	22.7247	15.4083	3.40492	6.35805	0	16.8006	0	17.7747	12.6275	3.65986	25.5097	7.54751	8.4183	46.6861	48.5093	79.8724	62.7329	53.3815	76.69	14.1847	41.222	111.399	59.4128	50.1772	71.4158	91.3361	82.4955	21.3563	43.5157	116.115	51.2455	38.0436	15.4356	99.5592	10.987	21.7317	19.9707	66.6425	44.2743	91.1835	11.3482	37.5779	75.2499
PE_37:1_[M-H]1-	758.571	1.80763	0.1	42.2952	8.35067	16.2996	38.979	0	0	0	0	25.065	26.8617	107.825	12.6887	14.1699	0	0	0	75.1997	77.1836	63.3332	48.1091	44.5866	50.1541	3.74793	9.04693	165.079	56.9301	64.9296	87.6083	29.1444	89.5775	16.4662	5.64083	92.1851	34.7251	39.3555	4.33554	46.1681	27.5997	6.54125	10.7515	56.4546	61.0063	82.3515	15.977	44.4059	38.2428
PE_37:2_[M-H]1-	756.555	2.16937	0	97.0759	85.0651	73.8573	97.1687	34.7854	44.9082	12.2431	10.9164	118.947	82.7141	121.746	75.2247	29.2881	17.4023	21.592	10.8618	267.467	208.269	258.582	160.24	162.441	186.907	20.5819	80.6989	287.866	190.683	277.715	150.941	135.11	215.837	89.3728	113.708	258.023	213.662	150.999	71.9769	235.806	159.185	52.0678	10.6842	230.884	200.335	245.535	67.0396	95.8077	126.333
PE_38:1_[M-H]1-	772.586	0.931935	0	2399.62	1486.64	1602.5	2384.95	861.763	1571.81	605.958	208.849	1814.68	1524.83	2717.22	1535.11	1101.81	1186.04	902.069	289.803	2225.03	2178.6	2420.83	1755.67	1811.67	1977.4	478.073	1211.48	3185.02	2189.72	2306.07	2147.95	2191.06	2144.78	1043.87	1178.66	2424.96	2054.32	1608.05	725.982	2361.93	1454.38	937.576	596.181	1849.08	2069.14	2286.48	1265.98	1622.94	1594.42
PE_38:2_[M-H]1-	770.571	0.789999	0	8032.71	6804.93	7190.88	8280.58	4116.84	6150.46	2680.97	1059.96	8598.6	6954.56	8736.51	7665.81	5262.33	5395.9	4057.64	1325.88	11376.8	9761.9	10867	8501.43	9331.19	9531.06	2093.19	5855.87	12876.6	8423.7	12002.7	10527.5	9025.49	10007	5448.36	5981.06	12273.3	8709.37	8074.82	3509.4	10532.5	7726.88	4155.34	3345.28	9377.66	9620.75	10356.3	6473.74	7923.07	8346.56
PE_38:3_[M-H]1-	768.555	1.42638	0	3482.36	2909.92	3115.72	3621.14	1793.64	2824.01	1197.37	451.634	3748.57	3003.58	3778.66	3386.12	2302.21	2375.15	1901.15	567.219	5098.35	4303.66	4764.51	3870.64	4175.85	4357.49	990.669	2779.64	5682.6	3658.39	5437.11	4844.52	4124.06	4356.46	2422.8	2739.48	5347.45	3792.51	3734.13	1574.36	4961.42	3379.02	1847.13	1471.12	4189.85	4191.21	4617.3	2981.15	3498.57	3779.16
PE_38:4_[M-H]1-	766.539	1.20672	0	9918.33	6451.08	6646.99	10177.1	4092.38	7382.31	3022.17	1117.26	7725.47	6745.19	12022.7	6685.87	5264.76	5478.96	4830.52	1701.18	10753.6	9804.81	11529.5	8699.23	9011.86	9983.56	2728.11	7505.04	14313.6	9777.56	11446.6	10453	11349.9	10901.8	5442.59	7131.25	11476	9548.21	8319.34	3309.4	12321.5	7446.8	4926.29	4441.51	9084.82	9416.28	11028.4	6494.07	8287.92	8679.91
PE_38:5_[M-H]1-	764.524	1.67261	0	1785.58	1123.48	1444.52	1726.1	1050.42	1492.29	641.23	267.246	1565.21	1196.35	2020.91	1288.7	1203.3	1221.99	1168.72	388.808	1948.06	1903.46	2371.82	1825.38	1787.28	2083.83	673.261	1756.52	2632.51	1856.78	2131.54	2116.16	2258.4	2276.67	1109.85	1886.12	2246.24	1842.82	1698.99	689.232	2392.66	1434.14	993.101	1249.07	1794.05	1717.91	2437.1	1484.08	1702.95	1890.33
PE_38:6_[M-H]1-	762.508	0.987747	0	640.504	411.366	508.31	589.743	376.284	549.305	206.914	73.8803	562.739	443.277	673.662	492.633	409.679	488.017	412.508	107.856	723.316	693.819	915.845	692.119	665.683	830.149	246.128	791.811	1000.57	662.857	836.642	891.313	918.017	908.03	400.729	793.228	897.186	668.391	664.122	238.616	960.866	577.948	344.587	453.495	676.634	672.947	1040.14	591.17	658	719.46
PE_39:2_[M-H]1-	784.586	5.94581	0.3	5.36087	4.91873	0	0	0	23.32	0	0	0	0	5.64358	0	2.81152	0	8.68325	0	10.3319	7.78468	4.49158	14.3979	4.83338	3.98495	2.96764	3.93105	17.0191	8.21722	10.0086	0	9.15242	4.65724	0	8.46618	8.62333	6.66465	8.91019	0	14.7226	8.93319	3.03193	4.61242	12.3064	8.78839	14.4637	0	3.92471	0
PE_40:2_[M-H]1-	798.602	2.56542	0.0125	84.8725	18.7561	21.0726	82.4489	21.3137	20.4107	8.33184	3.13068	36.4892	30.2886	118.034	23.8088	27.2557	9.53813	0	7.17085	82.2069	115.675	126.053	35.5765	49.3009	50.8437	11.6144	21.2608	161.487	125.539	69.914	66.4481	100.435	75.7024	28.864	55.633	92.9034	45.253	58.5608	17.886	71.7407	46.3719	27.3999	12.4607	63.386	93.2131	84.8059	26.3915	42.957	40.046
PE_40:3_[M-H]1-	796.586	1.95993	0	708.901	556.487	601.647	754.35	319.771	543.079	176.551	67.7541	761.134	605.509	784.665	591.382	402.432	376.215	312.705	74.0989	926.093	849.274	938.279	680.032	737.572	753.571	113.842	471.297	1061.31	705.199	997.449	892.955	749.85	796.706	453.023	443.168	982.615	772.529	707.17	280.479	867.959	658.279	328.601	185.634	803.745	813.23	871.571	528.549	635.368	630.961
PE_40:4_[M-H]1-	794.571	0.887351	0	3242.76	2240.92	2351.08	3443.7	1312.92	2378.44	907.224	336.35	2908.46	2421.81	3669.99	2470.22	1734.61	1753.78	1365.89	501.009	3764.43	3414.35	3855.86	3009.99	3190.97	3280.29	772.281	2266.56	4756.15	3144.08	3991.13	3555.48	3480.28	3441.74	1878.19	2154.26	4014.8	3218.65	2872.79	1183.44	3873.88	2656.81	1532.99	1180.11	3113.73	3307.43	3683.35	2243.06	2895.31	2792.63
PE_40:5_[M-H]1-	792.555	0.847413	0	1468.28	1002.87	1050.45	1671.64	640.787	1107.38	461.207	134.356	1115.05	1042.07	1865	1009.71	860.06	830.565	686.077	252.438	1702.71	1553.41	1761.93	1375.67	1506.48	1503.91	374.938	1170.19	2236.26	1453.09	1838.96	1654.36	1690.3	1686.95	813.26	1092.31	1819.96	1408.28	1367.23	579.191	1799.55	1145.76	729.938	584.285	1457.66	1487.64	1680.58	1015.45	1303.2	1365.65
PE_40:6_[M-H]1-	790.539	0.586625	0	1528.25	1193.69	1252.22	1502.66	693.127	1190.06	511.592	146.982	1386.63	1191.84	1721.97	1265.08	952.319	944.905	791.029	279.274	2064.35	1726.61	2055.49	1643.13	1624.91	1735.28	480.741	1251.89	2507.02	1621.26	2138.97	1950.06	1867.67	1896.52	1040.89	1305.52	2164.93	1639.13	1531.5	643.093	2135.69	1375.42	845	710.508	1664.9	1755.83	1983.88	1235.82	1548.63	1592.95
PE_40:7_[M-H]1-	788.524	7.50929	0	384.543	125.004	101.545	1081.15	91.3737	710.554	107.971	53.0826	189.77	143.001	235.457	260.412	106.435	310.687	410.451	89.6608	259.844	333.593	333.663	219.545	215.866	2810.16	167.643	3612.16	5254.02	474.323	224.937	323.408	328.961	336.193	131.662	238.767	282.045	329.716	193.331	96.8212	339.423	158.859	306.615	176.365	241.949	247.783	366.768	146.289	196.098	232.227
PE_41:5_[M-H]1-	806.571	8.06811	0	140.49	121.874	118.188	229.535	213.625	175.338	198.438	45.2761	135.029	130.714	236.569	93.7145	152.337	178.027	132.679	84.031	270.759	329.158	336.45	290.859	308.786	326.024	230.04	315.504	421.17	304.202	335.943	250.255	325.192	334.487	260.824	268.001	289.906	296.938	309.947	134.121	514.597	177.392	346.481	160.293	210.017	281.897	282.314	183.881	250.6	397.361
PE_42:11_[M-H]1-	808.492	8.5545	0	488.28	138.861	172.382	461.735	56.8827	126.087	21.8199	23.6587	143.808	130.876	644.222	97.0401	77.9695	62.6212	82.5793	10.4067	145.382	158.406	335.282	166.549	199.445	105.905	39.6227	152.832	298.031	130.108	224.066	285.595	333.73	296.25	62.9186	115.694	244.059	237.301	189.034	15.4809	348.76	57.3564	38.1722	26.0198	122.782	124.647	317.366	99.8137	133.797	121.138
PE_44:2_[M-H]1-	854.664	7.82692	0.2875	0	0	0	0	9.1515	5.50842	0	0	5.31959	0	3.27984	0	0	0	0	0	4.8587	23.1451	7.85677	5.75084	11.1402	11.2953	0	4.74988	8.91077	14.243	14.611	0	21.1718	8.09937	3.69076	6.30967	13.1986	5.20225	0	4.64498	5.03837	11.8438	0	0	13.2642	6.87806	15.2227	14.3312	9.90125	3.66575
PE-O_34:0_[M-H]1-	704.56	0.477222	0	460.369	145.079	62.595	401.396	34.6409	203.802	28.4556	11.9632	91.5861	156.327	262.523	101.858	39.736	6.54979	10.8429	5.87073	181.436	254.422	308.688	171.381	132.443	184.779	36.953	124.791	520.584	317.216	255.499	228.472	335.471	237.884	55.0048	82.3425	223.536	291.39	147.486	23.7068	325.015	66.7258	97.6575	17.4577	142.815	225.884	205.918	74.2407	135.322	189.214
PE-O_34:1_[M-H]1-	702.544	1.3279	0	297.828	112.683	180.199	274.601	70.7862	173.825	48.7749	8.37756	260.707	143.058	227.497	79.2593	111.167	82.2131	86.5597	23.7513	337.902	351.674	402.609	236.178	291.601	333.387	73.0333	241.976	570.028	331.042	337.741	311.727	406.448	336.94	116.237	187.959	365.4	309.317	204.211	79.4495	377.412	203.969	110.362	83.1184	228.561	312.289	329.801	170.499	219.349	313.785
PE-O_34:2_[M-H]1-	700.529	1.51014	0	2017.85	995.584	1100.11	1755.44	769.949	1420.19	587.17	211.396	1155.48	992.523	1624.78	964.85	941.819	1007.18	983.243	380.152	1539.83	1764.07	2248.38	1413.29	1471.06	1976.93	716.484	1742.45	2952.33	1944.03	1792.52	1826.84	2481.04	2116.27	920.294	1546.43	1785.9	1819.25	1418	490.109	2320.38	1221	1019.5	1208.39	1435.52	1666.73	2010.01	1146.74	1335.63	1607.14
PE-O_34:3_[M-H]1-	698.513	1.53807	0	539.005	70.8363	53.6764	433.948	58.2918	245.038	70.653	9.71981	85.3075	172.696	342.862	29.7658	114.716	100.333	139.132	54.1045	242.12	385.24	429.442	270.79	253.816	394.712	78.0728	357.204	641.326	416.798	274.454	278.454	524.037	412.244	92.8314	274.77	268.022	373.896	265.308	65.9483	458.969	160.13	136.241	117.195	227.271	265.935	349.656	148.034	198.026	239.31
PE-O_36:1_[M-H]1-	730.576	2.6084	0	568.149	285.072	277.372	566.354	81.6094	326.127	53.2829	8.89661	258.456	294.57	452.266	208.413	179.626	151.04	716.721	61.9145	435.482	414.91	488.29	264.238	381.525	350.791	50.3156	269.607	754.939	521.395	444.889	384.608	487.122	415.371	137.625	209.385	405.556	411.909	328.935	106.727	500.738	225.706	165.977	77.3234	357.392	412.125	404.478	216.899	316.543	299.744
PE-O_36:2_[M-H]1-	728.56	2.91089	0	1837.71	968.742	991.479	1569.91	704.461	1221.95	546.928	196.763	1171.04	1026.56	1444.68	936.704	850.74	878.943	952.227	338.669	1436.83	1594.24	1908.78	1301.97	1235.22	1700.56	543.388	1347.15	2564.34	1786.87	1589.2	1599.9	2067.22	1868.79	745.933	1266.59	1726.94	1569.73	1263.04	479.496	1873.99	1053.1	858.695	957.814	1320.09	1426.59	1799.76	1007.67	1179.38	1459.31
PE-O_36:3_[M-H]1-	726.544	1.18197	0	1405.85	739.423	749.197	1340.29	522.104	1000.41	432.577	104.418	820.726	737.301	1231.92	682.33	619.439	643.618	645.896	268.252	1155.17	1217.38	1526.04	1056.99	1031.81	1234.35	414.99	1077.45	1982.45	1304.01	1287.28	1166.91	1600.57	1402.58	613.59	971.119	1201.48	1248.27	1007.55	355.119	1546.32	906.16	663.581	708.359	1051.56	1163.05	1304.35	739.477	893.49	1024.7
PE-O_36:4_[M-H]1-	724.529	1.72616	0	460.757	181.885	140.519	452.824	96.6333	313.083	101.541	36.1734	209.146	191.341	344.446	76.7698	154.852	121.22	175.448	66.4737	290.87	404.986	458.675	300.232	279.354	352.324	98.3692	400.14	672.922	418.506	311.854	371.395	575.062	394.044	156.401	288.033	364.319	345.03	269.477	87.3652	543.829	208.689	185.31	117.086	285.305	305.465	427.509	180.981	275.715	291.625
PE-O_36:5_[M-H]1-	722.513	1.61707	0	3408.78	1228.5	1119.89	3642.17	851.908	2333.16	737.648	260.134	1185.08	1340.62	4371.58	1021.3	1240.89	1224.85	1228.99	588.068	1645.15	2106.01	2529.49	1847.6	1592.7	2185.52	844.889	2322.19	3943.65	2821.37	1963.62	2062.35	3684.67	2529.38	1055.16	1920.59	1829.31	2280.64	1710.01	560.278	3395.2	1211.5	1402.39	1516.15	1524.23	1876.34	2370.19	1304.76	1780.07	1838.93
PE-O_38:3_[M-H]1-	754.576	0.698228	0	289.756	40.8727	26.6585	185.16	33.705	102.809	6.45831	3.14506	29.2932	69.0537	137.263	27.8832	31.2436	19.3918	15.9758	5.57061	102.533	171.665	223.168	67.7469	93.6789	122.998	19.4879	99.4706	334.819	225.934	132.347	99.7871	254.844	140.307	17.8063	36.376	145.974	161.372	65.0374	2.79885	208.401	39.6163	72.4119	31.6279	68.439	124.166	80.7884	37.67	87.9108	54.9147
PE-O_38:4_[M-H]1-	752.56	1.07134	0	664.673	339.99	324.61	707.757	192.069	519.057	167.714	29.5167	397.411	378.585	692.168	257.94	298.597	268.46	212.503	93.9544	604.107	605.866	695.099	450.68	505.119	569.315	134.591	517.647	953.289	644.104	627.363	602.181	693.783	692.649	253.426	464.27	621.669	572.016	485.115	131.556	744.172	376.105	299.505	273.046	476.072	530.967	697.104	329.421	440.922	486.885
PE-O_38:5_[M-H]1-	750.544	1.29739	0	5648.49	2743.79	2939.42	5626.89	2113.25	4016.24	1551.43	655.936	3016.36	2889.32	6768.67	2477.09	2612.48	2723.51	2695.6	1124.93	3935.13	4534.39	5529.48	3876.25	3612.24	4730	1714.97	4333	7659.08	5365.95	4398.59	4476.34	6625.29	5612.19	2294.05	4053.88	4508.24	4897.26	3822.85	1411.28	6378.41	2927.03	2773.6	3010.24	3679.64	4038.95	5466.99	2905.17	3671.36	4188.56
PE-O_38:6_[M-H]1-	748.529	1.8336	0	1879.15	916.141	925.088	1843.79	673.011	1306.48	489.467	206.97	1062.07	948.038	2114.1	878.915	890.789	892.492	850.351	320.163	1423.35	1482.81	1877.97	1360.6	1275.31	1591.18	613.524	1565.36	2468.65	1788.44	1528.33	1584.43	2178.05	1818.66	803.586	1439.99	1459.63	1555.4	1324.67	483.012	2166.18	1012.8	914.194	1087.17	1281.51	1344.01	1838.82	1058.13	1302.8	1426.22
PE-O_40:4_[M-H]1-	780.591	1.0654	0	414.663	150.426	134.112	294.451	91.2479	219.651	39.7315	11.2483	124.303	162.925	411.272	110.874	96.4603	83.3361	75.9461	29.652	318.681	304.436	349.749	228.403	225.129	336.274	32.2169	199.813	502.61	382.068	251.602	269.373	384.826	291.472	98.6111	212.16	325.257	323.398	199.085	62.0153	375.112	123.731	133	55.6999	261.421	310.873	304.664	139.433	195.788	243.074
PE-O_40:5_[M-H]1-	778.576	4.44883	0	2191.8	1087.93	1249.7	2117.6	1023.47	1544.09	813.389	246.388	1340.53	1196.13	2510.83	1065.88	1068.57	1099.54	1097.23	441.828	1734.06	2008.52	2339.8	1558.51	1574.94	2052.2	905.333	1822.88	3145.17	2211.02	1851.9	1834.62	2620.34	2289.51	1018.41	1669.27	2022.55	1983.28	1666.93	681.483	2659.83	1369.18	1204.65	1149.45	1574.21	1782.42	2261.32	1341.57	1526.7	1735.24
PE-O_40:6_[M-H]1-	776.56	1.41489	0	1274.21	650.063	725.129	1138.83	567.195	941.54	408.473	137.958	774.38	700.512	1457.86	618.356	682.363	601.66	649.406	223.4	1074.63	1139.43	1431.42	1033.53	994.135	1178.33	421.711	1086.97	1828.11	1306.36	1183.78	1226.46	1531.37	1414.54	589.621	1012.31	1201.11	1175.58	960.704	403.995	1550.04	806.779	696.086	671.972	983.204	1017.47	1433.4	773.071	924.957	1057.52
PE-O_42:4_[M-H]1-	808.623	4.58404	0.1	96.8474	0	6.12536	50.2647	3.32401	12.8215	0	0	5.84656	16.3823	9.68621	5.84493	0	6.9043	7.64853	0	9.1563	24.9803	63.4332	10.6019	17.4927	67.0844	3.01239	27.3778	79.7987	65.0873	44.3133	44.7646	56.5466	49.6056	10.8433	14.9445	56.6756	21.2921	22.5433	0	65.7844	11.0251	6.7286	123.631	0	24.2999	41.1469	4.60026	15.7818	8.79005
PE-P_37:2_[M-H]1-	740.56	6.37356	0	58.3148	54.8227	55.5854	61.1325	17.7823	21.8586	3.85925	0.317318	22.0485	33.2882	69.1508	30.3218	19.773	56.8773	37.1789	10.9605	76.3206	84.767	162.975	125.724	101.073	138.577	3.40508	124.407	184.007	32.4434	197.638	136.077	142.768	154.096	43.4044	97.0539	127.235	119.8	71.0176	19.7295	173.323	55.0161	27.8401	358.087	115.043	62.3702	97.2766	45.3159	87.5688	176.848
PE-P_38:6_[M-H]1-	746.513	0.535825	0	415.322	190.797	203.869	413.564	96.8303	295.024	74.4832	29.9232	245.321	207.499	466.647	152.634	201.665	159.399	132.977	94.4355	364.902	386.625	548.102	362.403	300.387	442.83	161.874	408.059	673.887	466.698	398.25	462.906	578.477	516.768	218.799	392.5	391.18	370.284	383.24	95.9045	565.614	260.675	231.363	220.318	301.143	326.893	529.662	227.209	315.907	378.29
PG(33:0)	735.518	3.87207	0	376.064	444.972	611.634	560.537	46.3008	438.325	36.993	48.5386	455.505	377.384	671.956	614.522	253.867	364.045	530.529	81.2646	826.516	716.946	1191.7	871.321	833.051	1218.48	126.683	1087.54	975.961	439.758	1378.5	1224.06	1014.67	1034.56	511.624	906.673	1149.83	810.094	811.957	222.865	1256.08	622.317	287.504	918.822	920.53	683.071	931.304	468.058	852.714	1063.94
PG(34:0) & TG(42:5)+Cl-37	749.533	3.20933	0	861.793	435.609	434.547	819.819	279.217	627.099	184.984	55.8011	473.813	394.719	994.94	352.885	372.196	386.266	371.664	132.691	634.525	673.202	853.485	641.612	612.547	724.45	242.411	680.795	1195.4	793.635	708.353	691.037	1006.69	757.025	359.647	681.872	691.91	707.727	617.176	232.622	971.055	453.006	389.651	448.71	577.08	651.705	880.22	474.938	630.963	644.068
PG(34:1) & TG(42:6)+Cl-37	747.518	2.72716	0	180.936	63.8323	83.9214	185.297	52.5776	129.192	27.7781	11.7672	86.3036	90.5764	228.549	85.7012	66.1723	85.4972	95.1028	18.3899	238.749	247.712	320.481	217.725	241.533	274.915	56.8718	229.032	342.272	202.81	268.461	304.587	305.562	241.665	104.523	249.109	254.298	257.892	182.401	34.5014	316.524	98.006	95.3864	121.986	196.758	178.052	256.284	107.995	213.13	224.719
PG(34:2)	745.502	1.11104	0.025	56.9905	60.3626	76.767	79.0719	27.6689	48.2729	4.18278	7.10888	50.374	55.6038	96.4982	63.0901	17.8726	39.1522	13.839	5.13893	96.3145	50.7841	142.605	103.523	160.817	32.34	3.16474	60.4534	106.518	17.4899	146.435	148.693	106.906	116.518	41.5822	34.4725	156.28	80.1952	56.5674	7.72371	88.3686	28.0119	0	0	111.22	93.9236	130.279	30.3812	171.659	93.5695
PG(34:3)	743.486	2.89306	0.0625	15.9992	5.54118	4.44253	13.1131	9.47427	10.8403	12.6797	0	6.14654	14.2519	8.82054	0	17.2318	11.0619	9.12279	6.45164	19.4852	43.1844	6.23354	0	23.4347	20.8936	2.23863	5.34025	53.9284	40.7946	15.5778	20.7626	21.5282	16.1528	15.0052	6.04085	31.8938	27.2985	30.3104	13.1831	27.6515	5.48749	4.04566	0	0	48.672	29.9579	16.7627	55.1478	4.47056
PG(35:0) & TG(43:5)+Cl-37	763.549	3.34134	0	64.7838	114.374	186.989	180.544	19.9454	74.3143	10.9854	9.77202	76.6746	81.0156	189.774	161.36	66.889	125.47	122.113	5.46947	268.241	156.619	346.728	251.544	196.791	414.667	33.4626	305.088	300.345	96.8964	443.519	432.414	254.633	306.023	102.224	211.309	384.624	254.339	164.174	26.9229	422.934	112.788	34.1572	212.21	272.147	172.816	243.957	102.51	210.069	333.517
PG(35:4)	755.486	7.50398	0.075	6.01628	0.0616721	3.43854	4.75016	3.28768	0	3.9947	1.67716	0	2.15912	5.87792	4.24073	0.0545927	6.00747	2.61308	0	5.06456	3.07837	11.5356	0.0481686	4.20145	13.5457	0	4.26011	4.43033	3.50292	10.8454	0.115587	4.57079	10.047	0	3.04651	9.09756	0.0456317	8.97685	0	7.82654	3.35766	1.98386	0.000581777	2.30497	11.0064	4.75116	9.2111	3.96222	2.35565
PG(36:0) & TG(44:5)+Cl-37	777.565	4.04973	0	625.021	325.468	228.991	587.546	250.065	434.675	171.51	32.8408	330.464	350.521	674.672	266.935	295.358	328.307	323.125	135.262	483.916	543.188	667.369	476.365	480.602	605.021	189.915	499.353	936.436	680.598	516.77	572.083	725.247	687.188	267.252	500.42	606.672	566.685	433.764	148.552	733.348	361.354	311.999	301.769	438.624	460.515	712.057	354.642	428.099	480.848
PG-O_34:0_[M-H]1-	735.554	1.75038	0	117.16	129.7	104.362	137.193	52.3143	125.7	42.1537	0.213641	178.631	127.074	119.433	176.123	60.6907	180.82	80.5031	10.2556	213.298	141.558	205.244	118.287	152.324	145.746	12.7595	127.755	219.243	104.913	207.761	169.455	129.679	178.526	75.4511	87.9339	207.808	116.431	153.672	23.9554	185.548	71.529	28.9994	15.2317	112.178	144.68	141.062	56.8942	92.9391	117.791
PG-O_36:0_[M-H]1-	763.586	1.56007	0	70.8538	25.8986	19.1655	43.5854	111.357	90.3192	14.1111	13.2902	63.9739	60.353	23.4261	15.2271	65.2841	105.745	36.8815	23.4076	270.311	179.138	245.704	167.788	232.295	226.888	10.7449	172.233	477.161	133.718	205.367	125.775	221.108	305.279	73.807	168.649	341.481	113.705	223.479	11.0233	304.321	175.45	19.207	53.8547	220.141	145.761	283.211	127.608	83.9693	186.779
PG-O_38:0_[M-H]1-	791.617	8.86634	0	7.97162	20.9497	10.876	18.855	7.65402	14.8836	0.307427	4.15008	17.9322	17.2495	13.5683	6.76538	9.28361	31.8008	44.5309	7.88969	11.4397	27.8226	25.7816	7.67329	24.5077	22.1555	7.99883	24.476	27.4811	8.77889	19.0488	18.5302	28.6033	44.0744	17.3175	24.2851	29.9822	13.3762	14.5382	5.53903	12.03	18.3908	10.5274	9.75119	26.3864	15.4761	11.7092	16.3209	3.13982	21.4092
PG-O_40:3_[M-H]1-	813.601	8.25343	0.05	0.332836	0.186838	0	3.84616	3.55923	10.3047	0	0	0.122746	2.85143	7.58142	4.4096	3.42274	6.04737	9.8	0	16.1608	20.0548	12.2623	4.76576	9.99751	10.2923	1.74781	5.29807	10.0693	10.8123	8.83656	0.240829	9.99576	6.50255	9.6953	9.67428	8.95736	3.44143	5.65483	0.0962882	20.9034	18.3536	3.83235	9.43579	6.72864	6.7564	14.6775	137.48	2.98165	8.44069
PG-O_40:4_[M-H]1-	811.586	8.90271	0.05	0.102643	0.0134005	0	10.8956	6.92269	16.5294	11.2056	0	14.9866	17.7848	3.2662	6.44171	3.27216	0	6.06257	0	27.7118	41.0204	15.057	5.12969	9.00703	12.2333	12.7149	6.55018	8.57463	34.6003	29.735	9.30769	35.1411	20.2084	5.56537	6.76776	3.96497	15.8386	7.80546	7.43184	14.9953	6.67073	10.7537	62.0799	25.8	19.3246	16.3564	2.5286	11.0415	7.04191
PG-O_40:5_[M-H]1-	809.57	8.73595	0.1	0	0	9.46598	9.59865	4.8624	0	3.62425	0	0	0	17.6282	14.8064	11.413	0	3.76254	0	81.9646	134.514	260.382	72.8717	19.1085	105.524	218.046	106.805	152.809	121.984	97.4745	77.851	97.6422	40.7628	32.0956	72.6964	128.58	161.523	146.897	128.584	121.832	10.3026	33.0886	8.62209	152.327	112.537	102.661	91.1244	52.7407	66.3142
PG-O_40:6_[M-H]1-	807.554	7.80133	0.0125	0	3.50507	8.15834	7.60946	3.36259	18.8083	0.421373	3.20049	12.8971	11.8798	20.1481	7.67947	6.34382	18.1931	11.8732	4.88746	23.2859	20.3686	71.4727	18.8973	48.2809	44.476	2.28452	15.9112	25.3021	16.9226	78.7046	50.0003	59.9428	45.3838	8.09932	28.1921	51.2349	7.80071	22.3613	4.19449	51.7638	16.2558	5.82164	5.62886	41.5386	13.8427	31.4245	5.28014	34.8503	28.8446
PG-O_42:6_[M-H]1-	835.586	7.26736	0.125	3.2568	0	5.55654	0	6.14298	0.0238752	5.57411	0	0	4.71791	5.3408	5.31158	5.59572	4.46119	0	7.91325	0.0318525	5.21883	6.51702	9.07261	10.0971	20.1521	3.4685	4.43836	14.5253	5.49075	7.49545	5.22917	12.0915	5.48628	9.47968	5.2563	4.92407	3.78158	5.16271	0	13.1025	13.3967	0	203.127	18.1588	7.35783	9.79365	4.54149	4.3546	9.90217
PGP(16:0/18:1(9Z))	828.492	8.77649	0	141.183	88.1179	120.938	130.522	53.5155	87.3897	8.4125	15.2226	124.646	137.68	159.28	124.913	74.0156	109.4	158.096	28.7828	226.368	150.499	181.388	143.614	156.565	151.785	22.6038	111.632	155.665	109.85	260.626	196.036	113.441	126.929	98.6589	115.828	225.401	121.369	148.387	41.5132	163.901	80.8489	35.3074	16.9699	166.447	147.717	164.108	55.1536	115.468	162.826
PG-P_42:6_[M-H]1-	833.57	6.52315	0.0125	12.0313	10.2692	0	6.87845	78.7537	41.4105	12.431	7.00931	31.4552	22.3237	14.8893	12.3812	38.471	19.2331	15.8569	16.8937	166.44	92.3841	46.0555	48.8049	102.837	65.0486	2.47295	53.5312	132.599	45.9706	66.2127	67.6632	72.8264	73.3433	58.9438	38.0852	168.939	21.083	75.1757	5.67867	101.917	82.3148	16.656	623.952	95.2323	89.0122	62.0006	51.9231	43.063	73.1354
PI(32:1)	807.502	8.67889	0.025	36.4189	76.517	110.211	61.2592	0	57.42	4.95805	9.31121	53.3625	70.567	89.6463	92.957	27.3088	29.7376	10.4348	0	183.645	90.6738	230.124	189.448	136.355	248.762	3.69022	152.923	181.054	61.0825	335.844	271.717	186.568	176.856	69.9731	131.644	276.179	80.941	108.765	37.4377	220.603	80.0403	15.4353	90.8045	172.102	154.415	131.047	31.5701	144.337	162.524
PI(33:5)	813.455	8.66427	0.475	4.67869	5.46014	0	3.56963	0	0	0	0	5.01596	4.37239	0	0	0	14.0662	0	0	0	0	4.33979	5.01042	6.24334	0	0	0	3.21487	0	4.95663	15.8389	3.36326	0	4.64929	4.55823	3.50652	0	4.31491	2.8031	0	0	0	0	0	0	0	0	0	0
PI(34:0) & PA(47:10)	837.549	0.990091	0	351.133	206.211	306.615	383.779	336.786	226.266	156.588	64.4259	307.839	233.641	406.591	276.118	357.518	213.035	209.677	74.9633	798.777	718.596	959.81	627.728	768.029	825.163	296.142	783.038	1043.03	722.761	746.49	875.968	829.912	902.639	470.148	689.587	873.262	793.923	721.949	305.575	930.921	179.957	512.187	517.665	778.331	697.767	1090.93	683.835	667.191	747.572
PI(34:1)	835.534	1.22389	0	587.943	373.501	549.411	578.242	545.675	563.114	248.028	134.059	605.377	407.509	634.727	529.331	506.419	477.721	503.25	184.625	1199.62	1226.72	1453.39	1032.29	1126.49	1253.12	480.595	1300.86	1595.9	1085.64	1166.48	1276.65	1313	1418.56	733.452	1173.47	1411.6	1227.41	1119.49	480.57	1443.68	273.109	798.28	885.183	1186.61	1174.36	1632.25	1023.81	994.463	1182.93
PI(34:2)	833.518	2.32502	0	258.374	155.418	219.676	281.901	119.865	217.701	96.5159	23.6874	245.749	192.27	279.512	166.429	169.966	144.237	165.362	42.7082	643.214	450.584	657.809	494.474	638.765	428.613	87.4356	476.799	665.059	366.067	492.855	627.31	527.572	606.938	228.752	411.018	721.138	554.948	557.373	162.017	635.391	235.672	232.327	221.244	609.108	482.329	779.255	453.829	898.472	481.922
PI(34:3)	831.502	6.63813	0.0125	2.36643	9.58255	5.19556	4.18101	0.0694563	6.87333	6.69316	0	14.2826	15.0647	6.97488	8.06506	3.37304	4.45167	3.08891	2.81264	64.741	31.99	28.019	15.6294	33.7703	47.3885	2.1435	19.063	52.0277	16.4461	45.2223	35.0778	42.7057	31.0212	6.79606	15.2324	26.9621	16.044	11.968	10.4756	27.5017	5.98578	7.84873	5.11363	48.0136	20.5356	29.3509	24.9728	224.492	13.8242
PI(35:0) & PA(48:10)	851.565	2.80401	0	26.8878	37.6118	18.3162	62.0048	73.0323	57.1822	92.4049	10.5234	56.7376	67.7636	72.3256	52.7241	65.8168	62.3126	80.7448	63.6661	118.899	287.849	272.867	137.081	235.422	234.481	123.197	254.832	226.815	224.301	220.377	130.325	248.759	226.955	98.9095	242.968	179.677	221.654	196.851	73.5575	298.791	150.518	150.668	81.4606	112.265	241.812	199.518	167.716	163.032	216.508
PI(35:3)	845.518	8.91832	0.1	12.8608	0	5.48566	0	5.09744	13.072	6.90481	0	5.39551	3.81547	7.51519	4.12665	8.90663	4.29971	4.26084	0	6.30872	7.31958	10.8834	14.0017	4.21934	21.7318	4.07125	9.10973	8.07398	10.5847	10.7691	7.69294	10.0318	3.76851	0	2.34359	15.5337	17.9676	8.76367	3.53328	11.6137	15.1436	5.03992	0	14.4242	21.4559	4.84391	7.24261	4.5636	2.796
PI(35:4)	843.502	6.9149	0.1	6.5867	0.0418504	5.8636	4.92093	0	0.132065	0	0.131817	0.0737101	6.39136	8.12033	0	4.35775	0	0.00478797	0	10.3958	10.8951	33.5853	10.4143	3.29718	18.5192	2.17235	18.1217	9.67595	4.27133	64.1592	33.2509	27.8137	8.51896	4.65594	10.6298	9.22051	17.1283	18.5627	0	17.1	4.64969	3.9534	0	14.4546	8.53831	6.69046	0	11.8718	30.1813
PI(36:0) & PA(49:10) & TG_oxid(50:10)+Cl-35	865.581	3.5734	0.0125	60.1972	18.3917	10.783	22.6814	24.9721	25.6118	10.7422	7.41029	33.8612	28.8535	9.29	0	12.3973	16.1341	6.79248	5.07931	187.319	105.264	127.886	52.8133	123.373	124.075	9.08769	67.4326	251.954	51.7291	82.0025	54.4077	78.352	112.287	38.1684	57.5166	157.447	64.4496	100.69	3.2243	145.217	66.3187	22.1389	3.74346	116.062	93.5009	134.904	60.313	32.0965	89.6632
PI(36:1)	863.565	6.37943	0	30.4886	18.7983	24.9745	27.653	52.796	29.7717	35.0199	23.4472	20.4091	26.8128	32.8796	11.6716	16.2115	49.7744	87.7518	21.8385	64.7218	63.6339	57.1048	66.9804	47.1476	75.0384	19.5117	69.6731	125.561	81.1174	76.1083	55.2352	81.621	50.1222	46.2105	47.6449	57.8877	50.1087	53.1259	25.2212	97.5221	49.8736	31.2545	118.615	84.1192	67.7368	100.577	33.1914	40.7471	57.5407
PI(36:2)	861.549	0.368143	0	483.654	336.355	432.83	602.608	415.51	528.224	289.746	109.727	478.658	443.094	483.258	386.356	380.879	416.505	581.821	164.438	859.215	912.658	891.169	686.782	832.929	833.485	298.125	854.498	1033.09	737.614	866.104	832.073	846.284	907.756	575.376	721.851	881.909	836.98	746.522	292.157	1032.16	688.948	603.584	485.391	813.143	773.102	956.065	592.92	777.372	798.764
PI(36:3)	859.534	4.47219	0	47.898	66.1731	60.2706	104.914	58.408	77.2926	41.1479	11.6429	79.0038	58.2537	77.6067	70.6878	57.3175	28.5034	65.6244	22.4538	164.707	128.034	228.205	80.0743	154.231	151.287	23.4812	128.785	218.711	134.488	142.068	122.711	189.365	198.917	60.7554	80.5931	160.273	92.8109	141.09	37.6607	218.321	46.4146	64.1907	31.3953	139.479	169.301	186.779	95.1122	132.727	134.453
PI(36:4)	857.518	2.81329	0	129.856	65.9972	107.493	144.022	100.09	94.845	40.5421	32.1605	93.416	81.9518	178.357	65.029	54.7704	64.0299	53.0931	35.1059	250.501	246.42	232.9	200.039	257.97	227.434	30.8986	261.638	333.392	207.434	255.955	290.177	303.671	315.193	145.017	246.467	302.103	253.758	230.502	71.8027	282.56	125.547	152.584	83.0786	312.645	233.222	371.64	173.873	284.387	259.745
PI(36:5)	855.502	5.98286	0.0125	75.1634	45.3911	95.5236	136.708	15.4936	67.0249	2.82951	12.2369	41.8209	61.8564	239.67	102.184	22.089	27.7444	74.9389	3.07575	149.773	88.4003	242.215	155.271	265.974	148.691	5.39424	138.357	131.517	56.1151	301.632	301.793	173.747	259.991	20.7897	185.614	256.187	181.092	192.622	5.06115	273.858	44.6928	0.225325	0	176.591	113.343	224.683	60.4705	109.669	188.076
PI(37:0) & PA(50:10)	879.596	5.29709	0	170.178	168.925	119.626	233.751	174.59	95.0633	148.214	61.4892	175.091	110.784	340.911	133.078	154.512	93.7244	160.815	53.2924	265.668	339.528	390.149	317.915	377.392	352.621	256.126	324.691	302.176	243.639	438.394	448.39	335.777	411.149	251.639	271.023	395.307	282.487	234.815	135.401	375.255	361.847	285.484	79.5998	283.603	288.941	356.034	202.664	210.611	332.257
PI(38:4)	885.549	1.2879	0	2555.4	1178.94	1046.39	2943.48	1124.21	1961.29	908.855	431.464	1207.71	1492.71	3315.93	1183.15	1332.59	1207.48	1374.54	611.416	2237.02	2400.47	2672.95	1991.75	2257.15	2261.67	933.647	2687.75	3730.44	2798.44	2123.85	2356.22	3162.81	2678.13	1413.57	2046.28	2544.49	2501.84	2118.79	858.998	3247	1685.85	1874.53	1591.01	2170.55	2271.2	2727.22	1727.69	2369.02	2222.47
PI(38:5)	883.534	1.42881	0	172.568	61.8221	39.1628	220.565	28.0012	80.4076	27.883	24.5176	32.1227	77.3055	382.876	32.7442	53.5179	9.20569	43.5557	14.9781	102.816	94.2294	170.103	148.589	138.269	103.411	45.3531	177.099	228.242	98.7567	129.59	181.431	255.45	168.825	44.6708	114.037	110.438	137.732	65.8702	15.6197	199.289	41.2069	76.1402	24.1403	126.309	78.5991	141.251	63.2589	151.842	121.345
PI(39:2)	903.596	8.11629	0	37.7165	76.8748	155.103	103.73	26.9207	20.304	12.4806	23.4001	96.3294	60.8215	164.575	169.259	61.4967	17.1927	45.9205	0.202969	154.77	156.83	282.639	154.611	230.271	123.359	29.2175	186.008	168.184	50.2961	389.115	383.679	200.766	288.807	52.1835	127.033	355.359	229.891	182.239	4.72509	257.335	82.5085	8.11766	11.494	212.543	157.481	237.542	99.7931	196.517	242.875
PI(39:3)	901.581	7.61376	0.1625	6.65856	4.62958	6.26667	5.79114	7.81366	4.32564	7.11859	7.62879	0	6.60722	5.99843	0	11.4018	5.15611	4.36646	0	19.0252	5.98447	26.7798	4.73532	2.86204	7.95146	3.22513	7.1769	15.7304	2.75781	8.62712	7.93495	6.37877	5.11298	5.9635	3.79286	8.18102	3.65362	11.257	3.10373	25.6757	14.5936	2.96278	0	8.03109	0	19.9427	0	3.98618	4.19478
PI(39:4)	899.565	7.86335	0.075	20.3906	0.292147	0	8.07397	0	3.72598	3.87215	0	5.65853	3.84955	3.78099	0.00876767	3.12902	0	4.14825	0	21.8104	8.9264	31.1841	17.2168	15.8535	2.17944	0	19.8601	39.2462	2.42448	9.96403	11.188	22.3672	18.5727	3.06081	18.4448	41.2439	5.79499	16.9497	3.39285	42.1712	15.7717	3.45171	38.8719	20.5626	3.62818	21.0247	15.461	7.89634	9.47899
PI(39:6)	895.534	8.3397	0.2	6.07181	6.39626	0	0	0	4.91812	6.54853	3.13941	0	0	0	0	0	0	0	0	15.0124	11.2039	14.2091	4.63579	11.0231	31.2173	5.92395	3.77768	11.1948	6.03376	10.1613	11.7734	3.8371	5.58651	10.8772	9.41064	12.7205	4.79283	0	0	14.1953	5.39957	3.94463	4.41215	19.0833	11.6425	3.2826	0	0	20.2388
PI(40:0)	921.643	7.41879	0.475	0	5.5971	0	4.94598	0.184645	0	0	0	4.7511	0	0	9.67983	4.56512	5.82355	5.63528	0	0	3.3691	8.20152	0	4.44753	0	0	0	0	0	0	4.70286	0	3.33761	4.06272	0	4.44172	0	4.473	0	6.33289	5.80732	0	0	0	0	2.11614	0	0	0
PI(40:4)	913.581	7.11789	0.025	5.66556	18.7082	46.486	29.6215	62.9253	9.88852	3.96514	29.5001	4.66268	16.3099	26.4198	25.1969	19.9415	7.69777	10.351	0	19.8581	19.6156	49.6518	4.74311	31.6739	22.513	0	34.9121	23.2546	9.67712	59.8222	29.0262	17.6428	16.6869	15.6137	20.4073	13.9591	25.3842	18.8026	5.78264	50.9498	281.381	8.74432	284.698	39.4944	22.8469	29.1201	3.32859	32.527	19.4318
PI(40:5)	911.565	8.91913	0.05	17.2961	6.89288	0	7.16689	5.38496	8.56804	4.97016	0	5.71798	6.9639	12.8958	12.7458	0	0	7.02066	2.59044	31.0606	30.9378	116.736	78.1744	11.5836	63.1794	9.92421	80.0998	35.5948	30.381	142.726	100.321	51.2354	57.7432	3.72582	11.6911	29.9709	48.0106	36.875	3.28218	225.322	271.856	3.67329	399.406	45.3421	24.5941	40.0005	8.17561	17.9338	65.511
PI(40:6)	909.549	3.75037	0.0875	4.26161	0	0	0	4.08979	0	4.43988	0	5.54067	7.39466	27.2757	2.89681	9.34896	0	0	8.86407	16.1314	16.3598	19.4217	22.159	24.0136	27.5836	5.25408	33.0792	16.6916	8.29946	70.8055	36.3221	34.0798	17.3557	6.98909	28.6239	55.5512	22.6398	9.84961	2.87556	67.8665	18.3616	11.1944	10.6248	32.9308	26.4735	30.598	21.2771	20.7678	20.8902
PI(41:2)	931.628	6.17035	0.3	0	0	6.12596	0	5.72099	0	2.62224	0	0	8.28315	0	4.99132	6.06108	0	0	5.85515	0.190211	4.1666	5.46635	4.16055	14.1459	9.38524	3.47781	5.05497	14.8992	6.78724	11.8357	11.954	13.4843	2.53712	10.7339	13.3076	7.97475	4.64216	4.41182	0	10.5289	9.15021	0	55.5577	14.6473	0	18.2288	21.5487	5.28966	5.43224
PI(41:3)	929.612	8.27885	0.425	0	0	0	0	32.2846	0	0	4.70241	0	6.12958	0	0	6.20926	0	0	0	0.0509278	4.4348	10.1022	0	4.11128	0	0	8.66654	0	0	4.52146	4.66783	4.61591	3.75814	2.93691	0	16.0227	0	2.8308	0	0.168814	8.73784	0	92.5172	5.35073	3.50881	4.31767	3.77472	0.0683496	5.05456
PI(41:4)	927.596	7.35739	0.2125	2.32907	0	0	5.9496	21.9458	0	15.315	6.47045	0	0	0	0	7.30397	0	6.27149	0	0	6.43851	19.9398	9.47938	10.2334	4.46348	2.0519	19.9483	3.90533	3.48548	30.9893	13.7418	4.29135	9.76044	4.27148	9.33594	17.3971	6.02433	13.4069	0	113.459	15.4877	0	1535.25	7.16475	3.19682	11.1148	0	0	0
PI(41:5)	925.581	7.85791	0.35	9.75999	5.10376	0	10.8847	5.79979	5.67285	0	4.43799	0	10.5823	0	0	5.63004	7.91789	0	0	0	4.63728	5.48351	0	0	4.38538	2.69086	3.01025	0	3.32468	0	5.29025	8.20726	12.6865	2.18137	0	15.2989	5.23989	0	5.90272	0	0	3.55862	82.2132	5.29494	6.40402	8.42282	9.86407	0	0
PI(42:4)	941.612	7.46589	0.325	4.28682	2.97293	0	7.61807	8.42551	6.25103	4.46276	4.43316	0	0	5.32456	0	0	0.0492861	3.86145	0	0	0	4.4141	11.4634	0.0572742	0	0	0.163664	5.04993	4.39957	18.4422	0	0	0.0055954	0	4.28898	0	4.04809	0.233854	0	0.0412867	0	3.31367	78.5245	4.48801	0	7.60269	0.119463	3.8209	4.13728
PI(42:5)	939.596	7.35062	0.1125	20.5983	4.89249	3.66157	0	21.3274	0.120468	0	6.34037	3.15089	0	4.98145	7.77346	4.43668	0	4.70799	0	0.103023	6.05346	22.8152	39.2417	9.34806	42.8127	2.52325	22.6307	22.0258	7.64693	69.1449	51.8559	18.5761	4.77759	0	9.44729	34.5652	26.0473	5.87335	0	111.055	0	4.53747	220.618	32.5958	9.92221	29.7114	5.52259	7.19461	12.8071
PI(43:4)	955.628	6.67748	0.475	0	3.72876	0	0	4.39261	0	2.95921	4.96472	0	0	6.08525	0	0	0	0	0	0	0	0	4.82547	2.76332	1.24896	0	9.46674	0	0	0	2.82284	0	7.22223	0.0214467	4.54653	4.92104	3.66858	5.28135	2.64525	10.1999	5.20203	0	85.8672	0	0	12.3146	7.37389	4.32047	0
PI(44:10)	957.549	5.32255	0.1	5.80591	37.5587	41.0681	46.6075	3.1701	5.852	2.71395	11.6658	6.36382	16.9256	61.5928	29.008	0	0	0	0	35.6605	10.3806	55.3606	33.9513	24.2183	6.24	0	37.5387	39.6729	18.0474	131.932	124.085	22.7795	52.4019	12.793	4.48553	28.5996	45.18	7.71663	0	31.7203	7.40897	0	8.49591	24.097	27.2928	31.285	4.04875	44.1855	39.7461
PI(44:9)	959.565	6.27746	0.0875	10.8372	33.4394	61.8899	38.6263	19.0496	0	4.74738	5.11849	11.405	14.5904	68.4826	44.3669	2.50563	20.99	0	0	45.6561	12.8184	47.2019	21.2022	22.0551	16.0485	3.3148	4.67431	33.3079	6.515	75.3226	106.225	15.8839	10.6536	11.0857	9.85257	69.1282	31.4122	17.549	3.69666	18.4425	4.39844	0	64.1829	59.3067	13.9034	24.1205	0	49.7914	36.6238
PI(46:10)	985.581	4.2942	0.4375	4.45854	0	0	0	5.83139	0	0	3.22952	4.11724	0	0	0	8.69362	0	0	0	0	0	22.3471	21.3834	0	7.76204	0	5.43167	10.3223	0	21.676	22.2327	10.9856	7.27635	0	0	3.77739	4.41523	5.85282	0	84.0829	0	0	1135.84	0	0	15.4816	7.23388	0	0
PI-O_31:0_[M-H]1-	781.524	3.70397	0.0125	71.0502	30.769	16.1555	17.0243	8.92323	27.2788	2.72112	0	41.0837	21.3526	79.7942	33.6186	46.8724	52.4687	35.9388	5.55811	86.3972	77.4968	95.7558	60.3394	42.5588	96.5129	12.3948	50.9789	125.503	35.5945	71.6437	57.5974	72.3476	67.6027	23.1478	63.415	67.4516	25.4472	26.995	23.5824	55.6464	41.0734	20.2619	12.6102	73.0303	52.2694	71.089	46.6287	58.4634	70.7448
PI-O_31:1_[M-H]1-	779.508	5.80619	0.125	9.50586	3.8691	0	13.5584	9.6069	8.68556	0	2.53949	0	8.72532	12.5542	5.49346	9.07407	5.46187	12.7364	4.62775	20.052	7.07189	10.6277	28.5889	0	34.799	5.67141	26.8976	26.7788	9.32465	23.7791	25.0322	23.669	22.9601	0	9.90189	22.8348	15.9721	14.6683	0	34.2435	9.1103	3.90403	0	12.6826	9.8991	18.177	8.45425	20.6174	14.1704
PI-O_33:0_[M-H]1-	809.555	5.68522	0.025	0.0349443	6.2532	0.777047	11.8799	0	0.336301	4.97971	3.75327	4.70528	3.79816	17.6282	15.9573	15.7743	0.173918	5.77792	0	116.009	135.241	331.339	87.0417	26.0105	133.272	218.719	132.198	154.859	122.203	121.61	104.41	125.049	57.1445	39.7199	96.2372	161.688	204.246	172.254	128.796	148.836	13.1794	33.6956	4.82997	203.382	113.506	133.11	113.43	69.9656	94.4722
PI-O_33:1_[M-H]1-	807.539	8.97789	0.025	0.157251	4.43754	8.23111	6.15812	5.98607	24.3513	5.38186	4.6936	15.2678	12.6049	14.7776	7.67947	6.90092	8.33011	0	0	23.645	20.3686	70.8542	18.225	48.2809	44.476	2.40979	15.9112	27.2819	16.9226	78.7046	50.0003	59.9428	44.8767	5.24759	28.0539	51.2349	30.2941	22.3613	4.28261	51.086	16.2558	11.1288	5.59857	41.5386	5.03455	31.4245	3.87689	34.8503	28.8446
PI-O_36:2_[M-H]1-	847.571	6.85489	0	307.798	264.214	225.839	316.965	27.6231	196.486	37.241	8.31402	241.757	189.995	418.549	235.596	128.681	128.565	156.701	17.2398	369.074	292.452	465.83	340.491	334.352	491.329	60.0049	342.214	438.654	202.261	604.763	540.806	415.064	448.327	202.358	345.087	477.296	365.815	299.61	57.4791	483.77	231.167	131.25	210.827	387.457	255.743	369.92	158.869	385.32	385.344
PI-O_36:4_[M-H]1-	843.539	8.76367	0	277.584	197.198	178.009	335.906	12.4521	193.157	21.8938	16.5507	192.007	202.85	389.726	173.234	97.1499	138.896	194.24	27.2167	431.6	253.888	439.209	314.813	376.841	458.153	65.5098	371.654	485.59	179.579	592.237	531.607	453.801	413.628	197.094	382.334	513.866	347.737	289.382	79.8602	551.56	199.357	168.855	194.607	358.486	305.513	404.93	114.04	345.324	442.578
PI-O_38:2_[M-H]1-	875.602	7.26357	0.0125	5.40522	12.9766	12.7725	13.2767	3.66866	21.0036	0.624776	5.54745	8.42899	14.9894	0	5.54916	7.53067	49.7301	10.7851	10.6679	75.1279	88.8504	49.0516	29.8203	40.019	74.1226	57.7595	40.0984	67.0763	50.4715	38.4068	27.8912	34.0192	43.8315	35.1017	30.6831	97.3352	59.5481	31.7372	33.5324	91.1395	590.143	43.1277	8.62111	41.6103	71.0259	30.4029	6.39467	10.1035	37.9166
PI-O_38:4_[M-H]1-	871.571	7.96823	0.05	19.4657	16.5563	0	23.4335	4.44921	0	2.59472	0	0	11.5334	53.2594	5.59587	7.60547	0.0100294	15.7883	4.62098	16.5275	19.1929	59.7696	41.2051	21.7254	40.8531	15.5787	40.3247	32.7969	17.0546	53.9438	32.9153	44.9852	39.6157	15.8102	10.3061	65.8792	42.4363	22.976	5.6335	63.1731	6.93485	11.6197	13.5579	23.0594	38.3748	30.0942	19.1732	43.9609	29.7521
PI-O_38:5_[M-H]1-	869.555	8.70426	0.0375	49.3021	14.602	21.7642	39.6343	2.59487	34.6218	0	0	13.1916	30.6215	68.8	26.9203	0	4.72302	22.4556	6.76285	85.4497	80.2169	170.178	111.11	81.3926	105.044	5.92352	36.9473	123.367	33.0726	171.633	155.872	89.6031	95.8052	19.0282	51.4313	118.946	95.9403	94.5113	14.0424	112.656	20.028	29.7115	20.7298	84.0896	42.0615	113.326	23.6677	82.347	92.3669
PI-O_40:2_[M-H]1-	903.633	5.05554	0.2625	0	0	0	0	8.59844	0	6.27853	2.72802	20.4578	9.54594	0	0	5.1531	8.1702	11.3005	7.91307	36.5811	8.818	16.1846	13.0938	41.8151	15.3321	0	0	15.8314	0	17.8268	4.80282	33.6741	10.9425	0	14.6983	29.6607	9.6571	24.4745	0	41.3877	40.3829	0	126.164	11.5049	11.1024	18.7384	6.69843	0	0
PI-O_40:5_[M-H]1-	897.586	3.91049	0.0125	426.543	73.0063	3.47784	485.226	8.85208	102.346	16.2856	6.21376	0	88.5891	241.702	16.3791	76.2269	26.6029	67.2379	5.31608	94.3375	133.475	228.375	88.3444	53.8894	132.686	20.3105	375.195	438.507	187.939	126.739	152.341	373.274	196.319	14.4295	50.6642	93.6616	241.56	68.8286	21.4249	240.678	39.582	27.4424	92.6448	133.603	147.968	107.725	48.2673	117.251	119.861
PI-O_42:0_[M-H]1-	935.696	6.10268	0.1125	21.5831	12.2538	5.29797	5.46293	0	16.9499	1.99649	0	5.67444	4.84504	0	0	0	0.00925851	0	12.1577	48.6487	4.06965	5.31017	16.6732	16.1418	15.0571	7.79808	10.5927	32.2516	12.6548	3.19896	9.20941	18.4713	26.7229	6.41522	8.12088	60.9535	13.3164	23.2692	2.20076	16.3651	8.18068	2.89457	3.99166	57.1719	16.2559	40.288	13.8479	0.0240321	5.88637
PI-O_42:1_[M-H]1-	933.68	7.96545	0.075	0	0	0	4.95475	5.4374	14.6183	0.10308	0	9.32912	3.74461	0	0	0.128391	12.5573	0.0232189	8.8756	8.3798	27.0283	14.8626	18.6929	6.44584	13.738	9.45075	21.8769	8.61261	9.45468	18.804	24.4087	7.23535	7.30617	9.28782	34.2053	18.5102	16.6464	15.5171	0.849354	12.135	5.77402	15.2421	13.6927	0.0986458	8.67896	21.0385	3.45713	4.34225	7.1464
PI-O_42:2_[M-H]1-	931.664	5.45456	0.125	5.37771	0	0	5.12825	6.42154	10.0846	0	0	5.4556	4.69588	0	0	0	19.2413	0	0	52.9989	17.5974	57.7592	10.8193	43.6871	4.30182	4.4397	9.71366	52.7148	5.81443	14.2992	14.1664	9.14235	32.5031	0.0808057	10.9278	64.1708	17.85	35.0179	4.70124	36.3121	8.00934	3.39208	10.9297	44.1037	12.146	33.2661	39.3377	4.81578	12.7873
SM_32:2_[M+OAC]1-	731.534	7.16473	0.0125	33.0556	33.1287	31.5647	77.0736	138.148	32.2204	21.0447	18.3247	36.4389	84.4507	70.2724	74.8415	38.1487	19.9126	29.4561	14.1553	75.6215	28.9436	95.3588	56.3205	34.1345	57.8754	2.97433	14.744	47.3508	15.2611	94.6826	64.3564	24.2754	46.4338	10.1606	22.9238	55.3275	33.618	29.985	3.67993	79.6002	24.0289	0.108271	0	44.9757	44.6489	71.3055	27.5266	20.5074	47.1823
SM_33:1_[M+OAC]1-	747.566	1.94421	0	2351.33	2179.23	2352.07	2553.28	4070.51	4373.5	3968.66	1108.58	2859.76	2688.5	2630.86	2328.47	3424.95	4684.41	4646.67	2316.47	5272.55	7622.25	7318.93	5691.69	6711.38	7918.92	5175.94	9620.24	7598.59	6344.39	5906.33	5218.45	8253.67	7620.03	5494.09	8036.31	6455.34	5608.83	5559.88	3114.46	8676.26	6246.2	5625.97	5357.43	4917.92	6739.99	6743.75	5587.04	4850.58	7444.3
SM_34:1_[M+OAC]1-	761.581	0.463947	0	1493.04	858.715	894.48	1195.02	1765.22	1771.78	887.828	371.429	1803.8	1147.55	1124.94	1182.92	1405.46	1662.74	1243.13	500.221	3322.43	2292.35	3353.26	2363.14	3100.97	2830.91	545.398	2729.36	4725.09	2028.37	2648.43	2428.37	2951.15	3564.03	1488.84	2930.74	3939.25	1811.34	2716.76	753.832	3833.02	2726.21	922.94	1227.91	2764.96	2120.13	3247.24	1926.01	1838.82	2597.38
SM_34:2_[M+OAC]1-	759.566	1.26427	0.025	22.2006	24.8778	10.5114	15.5872	33.0626	58.1529	3.57556	0	27.8761	34.9877	27.1817	25.5722	22.8598	70.9375	13.8005	0	229.04	118.781	230.382	107.644	263.694	203.283	6.95006	176.061	295.218	77.7108	133.116	129.251	167.582	233.27	73.7425	210.879	259.473	50.6611	138.598	30.6953	210.45	138.135	14.7556	9.66481	165.56	84.1182	231.768	86.4553	56.8413	129.75
SM_35:1_[M+OAC]1-	775.597	2.08227	0	336.255	259.021	328.444	386.948	609.415	610.521	561.843	119.799	460.537	337.933	346.482	297.484	530.459	626.271	626.813	274.378	858.257	1103.29	1050.01	846.606	986.455	1202.97	653.723	1211.28	1198.6	943.929	894.884	762.936	1168.15	1090.97	755.942	1110.78	994.569	835.081	847.595	434.726	1233.9	936.683	756.793	653.122	779.646	1013.65	1015.93	792.217	687.279	1064.97
SM_36:1_[M+OAC]1-	789.613	2.8305	0	322.841	247.843	305.731	282.101	331.745	349.661	146.221	52.7175	421.601	260.825	329.175	271.046	272.839	368.977	298.117	89.8964	690.559	462.666	589.679	438.48	572.618	538.217	60.0289	466.792	800.33	368.854	504.219	434.875	510.827	634.358	232.39	474.919	747.921	315.071	513.857	147.155	713.712	515.113	171.222	143.062	508.75	446.709	629.685	365.231	338.758	481.158
SM_36:2_[M+OAC]1-	787.597	2.50921	0	28.3251	12.1038	0.0961719	17.7175	28.9101	21.6194	9.78758	10.6237	13.755	41.6946	12.1236	13.3975	14.3165	23.8989	23.3097	17.5157	140.857	102.409	104.257	77.047	143.065	128.983	7.00708	81.9351	221.666	70.4779	108.957	102.281	98.5308	149.398	45.6992	157.419	219.857	46.7968	73.0245	15.7855	167.079	107.514	13.0678	10.7077	91.9262	77.4706	129.737	33.8732	18.9423	53.6742
SM_37:1_[M+OAC]1-	803.628	2.20407	0	114.232	105.841	113.078	219.421	379.662	309.982	273.556	80.4734	244.533	187.124	219.141	97.9332	242.328	284.286	274.584	151.745	468.292	685.107	584.123	430.023	574.043	628.753	346.796	594.744	708.254	580.407	521.583	399.927	654.009	586.574	456.95	564.187	581.536	473.177	462.967	236.619	709.29	477.908	431.334	335.225	389.599	616.779	548.605	469.795	411.628	551.973
SM_38:1_[M+OAC]1-	817.644	0.762863	0	182.127	56.3964	42.3364	92.6285	172.43	148.376	96.9024	14.9865	248.136	91.8633	136.684	67.8589	156.576	160.581	95.5112	64.9906	518.994	428.016	467.011	322.542	466.163	437.074	66.8437	433.82	606.362	336.37	404.245	278.758	441.734	473.201	234.319	421.366	571.943	310.168	359.035	134.91	586.678	352.864	202.41	88.3059	368.041	352.551	464.944	300.875	211.667	369.414
SM_38:2_[M+OAC]1-	815.628	3.31544	0.15	0	0	0	5.07737	5.34161	7.66331	0	0	11.0315	0	3.52765	6.95079	9.50809	11.6603	0	0	82.4283	50.0181	6.13268	25.7531	31.7892	32.128	3.12847	5.20685	117.303	13.1373	22.0826	5.08939	20.831	30.3	4.58521	19.2089	99.2827	0	17.0063	0	19.8467	21.9075	6.93219	0	18.0986	11.4008	52.5883	14.1732	9.67018	7.35015
SM_39:2_[M+OAC]1-	829.644	0.270737	0	302.474	331.645	402.596	397.912	739.446	632.701	545.746	134.03	527.957	421.133	427.712	385.91	537.758	707.113	556.973	276.772	847.755	1148.06	1026.05	798.687	1055.68	1146.98	613.478	1134.93	1093.34	936.893	970.964	791.645	1100.27	1112.3	820.394	1002.32	997.939	847.552	816.106	471.246	1215.53	936.325	806.966	852.054	737.998	1088.06	992.893	863.154	718.087	1038.9
SM_40:2_[M+OAC]1-	843.66	2.75733	0	310.256	120.026	212.164	262.091	450.782	356.597	283.22	81.2887	480.679	232.052	193.828	197.151	385.119	453.873	234.642	123.525	911.855	791.257	823.671	614.331	828.281	761.13	225.071	638.141	1131.41	611.766	733.047	663.722	759.643	870.571	500.008	689.63	970.724	597.521	727.074	264.652	956.165	706.826	392.224	272.731	715.159	711.135	816.638	539.16	485.478	720.142
SM_42:1_[M+OAC]1-	873.707	1.98579	0	1269.13	763.271	821.815	892.409	1549.88	1132.1	661.939	379.728	1705.77	902.948	935.792	865.169	1221.4	1252.26	794.13	302.405	2602.7	2050.67	2579.78	1748.51	2219.85	1966.61	398.927	1549.36	3665.13	1677.76	1975.86	1807.51	2131.05	2611.35	1002.39	1779.71	2990.16	1467.4	1933.92	622.302	2667.59	1948.12	752.919	743.439	2088.76	1732.91	2644.61	1533.77	1335.91	1810.42
SM_42:2_[M+OAC]1-	871.691	1.14289	0	1653.7	1002.3	1141.46	1206.95	2063.43	1547.77	823.028	436.505	2394.93	1219.48	1259.58	1206.83	1615.27	1574.48	997.246	396.372	3751.4	2686.6	3310.36	2299.5	3023.94	2630.14	487.113	2080.39	4988.49	2205.75	2701.88	2486.56	2777.32	3499.08	1374.34	2489.43	4135.51	2045.84	2727.13	762.797	3506.81	2662.8	920.999	873.541	3105.84	2366.32	3513.43	1996.64	1859.59	2407.72
SM_42:3_[M+OAC]1-	869.675	1.27921	0	497.951	281.026	291.218	275.85	522.074	461.138	173.389	90.1659	782.189	283.407	330.13	326.608	505.034	484.599	265.49	77.625	1255.58	858.621	1159.22	787.161	996.555	939.719	93.8489	638.989	1571.13	684.486	872.676	781.702	881.71	1073.46	456.604	839.222	1448.13	644.339	870.292	229.363	1180.67	866.502	238.261	206.63	1004.62	738.766	1186.04	659.954	594.203	793.537
[truncated: 45 more columns]
