# Supplementary material for: Lipid extraction from dried blood spots and dried milk spots for untargeted high throughput lipidomics
Source: Royal Society of Chemistry journal article supplement (doi:10.1039/d0mo00102c), 2020-09-10
Supplement: d0mo00102c3.xlsx [file d0mo00102c3.xlsx]

## Sheet: +ve
DMS, CV test of XMI and DMT (+ve)				Total signal	1000	1000	1000	1000	1000	1000	1000	1000	1000	1000	1000	1000	1000	1000	1000	1000	1000	1000	1000	1000	1000	1000	1000	1000	1000	1000	1000	1000	1000	1000	1000	1000	1000	1000	1000	1000	1000	1000	1000	1000	1000	1000	1000	1000	1000
				0s per sample	14	20	13	19	17	4	68	61	20	21	12	24	28	14	11	14	20	12	16	5	11	61	13	24	17	16	21	22	21	23	57	14	3	13	15	21	20	21	17	12	13	14	12	57	21
				Solvent	DMT	DMT	DMT	DMT	DMT	DMT	DMT	DMT	DMT	DMT	DMT	DMT	DMT	DMT	DMT	DMT	DMT	DMT	DMT	DMT	DMT	DMT	DMT	DMT	DMT	DMT	DMT	DMT	DMT	DMT	DMT	DMT	DMT	DMT	DMT	DMT	DMT	DMT	DMT	DMT	DMT	DMT	DMT	DMT	DMT
				Sample type	Almond	Almond	Almond	Almond	Almond	Almond	Almond	Almond	Almond	Almond	Almond	Almond	Almond	Almond	Almond	Jersey	Jersey	Jersey	Jersey	Jersey	Jersey	Jersey	Jersey	Jersey	Jersey	Jersey	Jersey	Jersey	Jersey	Jersey	Jersey	Jersey	Jersey	pWhole	pWhole	pWhole	pWhole	pWhole	pWhole	pWhole	pWhole	pWhole	pWhole	pWhole	pWhole
Lipid variable	m/z	0s		0s	Furse_Ex052_DMT_A09_003_Almond.mzXML	Furse_Ex052_DMT_B04_013_Almond.mzXML	Furse_Ex052_DMT_B07_015_Almond.mzXML	Furse_Ex052_DMT_B10_004_Almond.mzXML	Furse_Ex052_DMT_C05_019_Almond.mzXML	Furse_Ex052_DMT_E06_020_Almond.mzXML	Furse_Ex052_DMT_E07_008_Almond.mzXML	Furse_Ex052_DMT_E08_010_Almond.mzXML	Furse_Ex052_DMT_F01_005_Almond.mzXML	Furse_Ex052_DMT_F04_012_Almond.mzXML	Furse_Ex052_DMT_F06_018_Almond.mzXML	Furse_Ex052_DMT_F09_014_Almond.mzXML	Furse_Ex052_DMT_H01_016_Almond.mzXML	Furse_Ex052_DMT_H07_017_Almond.mzXML	Furse_Ex052_DMT_H10_007_Almond.mzXML	Furse_Ex052_DMT_A02_016_Jersey.mzXML	Furse_Ex052_DMT_A05_013_Jersey.mzXML	Furse_Ex052_DMT_A06_012_Jersey.mzXML	Furse_Ex052_DMT_A12_005_Jersey.mzXML	Furse_Ex052_DMT_B02_018_Jersey.mzXML	Furse_Ex052_DMT_B11_007_Jersey.mzXML	Furse_Ex052_DMT_C10_001_Jersey.mzXML	Furse_Ex052_DMT_C11_014_Jersey.mzXML	Furse_Ex052_DMT_D01_006_Jersey.mzXML	Furse_Ex052_DMT_D04_019_Jersey.mzXML	Furse_Ex052_DMT_D05_002_Jersey.mzXML	Furse_Ex052_DMT_D07_004_Jersey.mzXML	Furse_Ex052_DMT_D08_003_Jersey.mzXML	Furse_Ex052_DMT_E01_015_Jersey.mzXML	Furse_Ex052_DMT_E10_009_Jersey.mzXML	Furse_Ex052_DMT_G02_010_Jersey.mzXML	Furse_Ex052_DMT_G03_017_Jersey.mzXML	Furse_Ex052_DMT_H09_020_Jersey.mzXML	Furse_Ex052_DMT_A04_005_CapWhole.mzXML	Furse_Ex052_DMT_A07_012_CapWhole.mzXML	Furse_Ex052_DMT_A08_009_CapWhole.mzXML	Furse_Ex052_DMT_C02_017_CapWhole.mzXML	Furse_Ex052_DMT_C04_013_CapWhole.mzXML	Furse_Ex052_DMT_D02_004_CapWhole.mzXML	Furse_Ex052_DMT_D06_011_CapWhole.mzXML	Furse_Ex052_DMT_E09_002_CapWhole.mzXML	Furse_Ex052_DMT_E12_008_CapWhole.mzXML	Furse_Ex052_DMT_F08_010_CapWhole.mzXML	Furse_Ex052_DMT_F10_001_CapWhole.mzXML	Furse_Ex052_DMT_G12_020_CapWhole.mzXML
DG(18:00)_[M+H-H2O]1+	355.285	0	0	2	52.5607	51.0701	50.9894	49.678	49.3807	40.7778	0.384256	1.307	59.6757	54.0162	50.0054	53.0282	64.5695	51.106	49.9661	47.8229	50.7533	50.707	49.0523	34.12	48.7692	0.120337	44.9978	60.249	48.7438	49.4647	52.2864	51.0063	53.2851	49.443	2.94545	51.3694	41.5258	45.7511	53.3263	50.7309	49.673	50.242	46.1583	46.1319	47.1726	47.0428	49.643	0.519098	53.6898
DG(20:00)_[M+H-H2O]1+	383.316	0	0	2	123.142	131.481	119.85	131.818	128.799	108.051	1.07634	3.26636	152.18	139.339	120.804	134.067	160.912	128.413	128.25	128.537	134.273	121.682	130.264	94.3596	117.217	0.540866	112.968	150.146	128.344	127.503	136.818	134.922	138.995	125.661	7.49971	130.118	108.762	115.966	137.441	132.254	129.935	132.362	115.187	115.049	117.721	114.667	129.178	1.19879	137.82
DG(29:00)_[M+H-H2O]1+	509.457	0	0	2	4.25374	4.59615	4.15546	4.58675	4.73818	2.85632	0.0333532	0.0569604	5.01562	4.55834	3.97735	4.05665	4.98599	4.22186	4.18691	4.75899	4.61041	4.48895	4.90857	3.04612	4.2163	0.0281196	4.22928	5.24418	4.8304	4.70479	4.41512	4.42736	4.95492	4.35701	0.191717	4.37856	2.74828	4.3511	4.81436	4.60798	4.52627	4.57923	4.28261	4.07001	4.09997	4.18377	4.29513	0.0109588	4.06104
DG(30:00)_[M+H-H2O]1+	523.473	0	0	2	60.731	68.4303	58.7446	68.2038	69.4883	45.7452	0.652197	1.9268	77.1854	69.175	60.4151	63.9246	78.712	64.5753	64.6101	70.8867	69.2896	63.5213	71.4696	45.2925	61.4799	0.557721	61.6512	78.383	71.3008	67.921	67.5531	68.1212	73.8829	63.4512	4.07815	66.8025	43.6996	63.6115	70.0245	69.1328	69.3259	68.4952	61.2245	62.2096	61.5098	61.1133	67.7216	0.726557	63.1136
DG(30:01)_[M+H-H2O]1+	521.457	0	0	2	25.957	24.8993	25.7065	25.0498	26.0152	18.5483	0.0633435	0.382118	25.7529	25.2933	25.8359	23.0687	25.9197	23.3956	23.471	26.384	25.4182	27.0717	25.4584	18.0016	26.8014	0.076801	27.2711	26.9516	26.3944	25.4826	24.8466	24.7908	26.02	23.4198	0.360544	24.1871	17.3285	27.2869	25.9553	25.3665	25.129	25.0164	27.1691	27.4668	26.2598	26.3032	24.9697	0.0643269	22.6707
DG(31:00)_[M+H-H2O]1+	537.488	0	0	2	7.90995	9.14853	7.84782	9.10256	9.51644	6.10291	0.0766403	0.203311	9.8365	9.09374	7.61674	8.24507	10.2625	8.60283	8.72019	9.64442	9.41476	8.28456	9.98476	6.24536	7.85842	0.0572901	8.10612	10.6831	9.71807	9.35958	9.06232	8.9961	10.0145	8.86276	0.584519	8.84593	5.75449	8.46775	9.45118	9.18289	9.10522	9.07385	8.21265	8.03795	7.8894	7.89577	9.06835	0.0815532	8.21536
DG(31:01)_[M+H-H2O]1+	535.473	0	0.05	2	1.73456	1.77703	1.69989	1.76958	2.01121	1.17859	0.0241409	0.00904179	1.78089	1.74791	1.56399	1.59131	1.96907	1.83455	1.84706	1.88536	1.78637	1.82012	2.08895	1.22329	1.69832	0.0185017	1.74167	2.2846	2.08662	1.99542	1.68967	1.73217	2.03535	1.88211	0.0236744	1.90553	1.11444	1.83451	1.90326	1.82835	1.75374	1.75577	1.82579	1.68563	1.72453	1.74253	1.85674	0.0302711	1.55451
DG(31:02)_[M+H-H2O]1+	533.456	0.025	0.075	2	0.262053	0.207747	0.230549	0.209918	0.22508	0.144086	0	0	0.314721	0.208918	0.245881	0.195467	0.413736	0.191887	0.213076	0.224934	0.186183	0.274271	0.245581	0.117882	0.247598	0.028284	0.230406	0.275832	0.238203	0.233913	0.203486	0.204807	0.402884	0.174662	0.135025	0.243874	0.148664	0.236365	0.206901	0.226265	0.21063	0.208485	0.25582	0.248611	0.22894	0.203515	0.207855	0.00169447	0.185573
DG(32:00)_[M+H-H2O]1+	551.504	0	0	2	70.4954	90.6394	68.8166	91.0834	86.9602	64.6914	3.09135	4.46959	99.9659	90.454	70.5187	83.0622	95.9296	78.4527	79.3938	94.8803	91.2089	74.3223	89.3733	65.8926	73.3248	3.1053	74.7577	94.4265	88.9712	85.155	89.537	90.5014	91.6482	78.0396	7.3779	81.73	61.2918	75.9096	92.4407	91.6973	92.0187	90.8047	73.477	74.1978	73.8245	72.9828	83.2366	2.98812	82.3777
DG(32:01)_[M+H-H2O]1+	549.488	0	0	2	44.5537	43.1414	43.9896	43.5322	48.9556	31.0656	1.54426	2.16007	44.0602	43.1344	43.5006	39.1743	48.3677	43.2601	43.4434	46.0046	43.9426	46.6749	49.0408	30.8073	45.8005	1.60711	46.9659	51.5866	50.2056	48.2903	42.5313	42.6539	49.4107	43.926	1.90342	44.6551	28.9713	47.2384	44.287	43.8237	43.5758	43.2287	46.9679	46.9271	44.9985	44.9029	46.2501	1.53683	38.8048
DG(32:03)_[M+H-H2O]1+	545.457	0	0	2	0.72647	0.710396	0.880637	0.760592	0.851017	0.677917	0.0241441	0.0223939	0.719779	0.675925	0.742357	0.581316	0.962027	0.741484	0.728995	0.891118	0.819043	0.663129	0.844775	0.84894	0.670639	0.0409454	0.642223	0.990494	0.910901	0.829554	0.702929	0.708039	0.909522	0.831817	0.356837	0.772898	0.620286	0.668043	0.745752	0.758907	0.759416	0.77207	0.72965	0.676773	0.627116	0.621346	0.768978	0.0393663	0.594707
DG(33:00)_[M+H-H2O]1+	565.519	0	0.0375	2	5.79667	5.74974	5.6506	5.87523	5.9917	4.09441	0.0313909	0.0574652	6.10814	5.72018	5.44542	5.1652	6.2604	5.33601	5.28335	6.31902	5.96027	6.12864	6.34528	4.33946	5.87473	0.0384783	6.18778	6.57309	6.17612	5.96302	5.73233	5.74645	6.14966	5.42717	0.268327	5.40138	3.79796	6.35283	6.09895	5.94909	5.88901	5.87526	6.22612	5.93077	5.82104	6.01928	5.4266	0.0121376	5.11885
DG(33:01)_[M+H-H2O]1+	563.504	0	0	2	6.75866	5.53596	6.55957	5.65665	6.64453	4.16212	0.06316	0.223405	5.64757	5.60236	6.24428	4.98958	6.21828	5.69765	5.84011	5.9738	5.79166	7.04481	6.63969	4.43714	6.67323	0.103465	6.9842	7.19852	6.71206	6.50867	5.58388	5.50942	6.36589	5.91154	0.143481	6.00255	3.9372	7.17118	5.78665	5.62718	5.56595	5.56664	7.14108	6.9765	6.5664	6.84862	6.06953	0.139792	5.00896
DG(33:03)	594.51	0.025	0.025	2	0.292872	0.238793	0.330843	0.230429	0.426482	0.210492	0	0.0237384	0.216336	0.223162	0.319556	0.252166	0.404314	0.439078	0.414883	0.228965	0.23167	0.255269	0.386611	0.177343	0.299723	0.0228625	0.307595	0.344625	0.435338	0.438768	0.216853	0.224813	0.377305	0.440231	0.446229	0.439751	0.192543	0.267905	0.242161	0.232347	0.222311	0.239638	0.327442	0.319033	0.297465	0.341705	0.415542	0	0.219019
DG(33:03)_[M+H-H2O]1+	559.473	0.0125	0.025	2	0.029195	0.0257185	0.0443213	0.0229063	0.0197993	0.0896468	0.0682268	0	0.00710275	0.0165963	0.0313376	0.0329576	0.0161671	0.0226883	0.00688085	0.0184131	0.0306085	0.0262547	0.0222087	0.0804234	0.0259414	0.0550611	0.020558	0.0307148	0.0189564	0.0371305	0.0277177	0.0138048	0.0181399	0.032014	0.00917022	0.00788529	0.093831	0.0200385	0.0196153	0.0214469	0.0279345	0.0204933	0.0154761	0.0350525	0.0323657	0.0352836	0.011263	0.0348116	0.0357088
DG(34:01)_[M+H-H2O]1+	577.519	0	0	2	86.2426	76.0277	85.122	77.2565	86.3498	80.6009	65.1272	65.1609	76.6047	75.9624	84.8221	68.139	84.4071	74.5343	76.2692	82.0385	78.0051	91.8533	87.5439	87.5675	90.5299	64.5866	92.9445	89.7455	89.0892	85.1589	74.9684	75.675	86.9164	75.7246	61.664	77.6133	73.077	94.9732	77.8842	77.3566	77.8983	76.2351	92.6175	92.3803	88.5516	88.6571	81.0707	62.7953	67.9687
DG(34:01)_[M+NH4]1+	612.556	0.2625	0.475	2	0.0052772	0	0.00489067	0	0.0155659	0.0200312	0.0298784	0	0.0139608	0	0	0.00295883	0.0516224	0.00363223	0.0096549	0	0	0.00554574	0.011533	0.0148309	0	0.0103977	0.000206396	0.0193399	0	0.0119125	0.00273558	0.00275518	0.0336447	0.00353954	0.00497101	0.0101749	0.0360031	0	0	0	0	0	0	0.00665162	0	0.00732184	0.00314647	0.00413424	0.00513211
DG(34:02)_[M+H-H2O]1+	575.504	0	0	2	25.3246	15.1599	24.903	15.553	18.1257	23.7404	35.9992	35.3458	13.8886	15.1239	25.0115	13.8471	15.8078	15.5117	15.9085	16.5352	15.7564	26.6837	17.835	26.9781	25.2725	38.8418	26.876	18.3694	18.2842	17.7274	14.9114	14.8988	17.1749	15.9899	33.3694	15.8374	21.4719	27.1693	15.5234	15.4917	15.2767	15.1943	27.0147	26.9133	25.1388	24.9384	16.7815	36.1865	13.6798
DG(34:03)_[M+H-H2O]1+	573.488	0	0	2	1.85919	1.38113	2.09768	1.44112	1.60316	2.13459	3.05421	2.77661	1.20295	1.32658	1.89684	1.32984	1.22754	1.27633	1.16542	1.77838	1.54628	1.84185	1.64183	2.50453	1.73437	3.24532	1.83636	1.75294	1.63292	1.56065	1.38267	1.36534	1.41132	1.34354	2.5253	1.27483	1.79099	1.93327	1.45937	1.49865	1.42428	1.34791	1.99693	1.80364	1.59306	1.67397	1.36216	3.36034	1.27929
DG(35:03)_[M+NH4]1+	622.54	0	0.025	2	0.0311557	0.0136087	0.0399753	0.0109712	0.0499095	0.0186683	0.05071	0.0249338	0.00585603	0.00690453	0.0167418	0.00741625	0.0240074	0.0252831	0.0354423	0.00511807	0.0127926	0.0237008	0.0237901	0.00284956	0.0112356	0.0149659	0.0235268	0.0192356	0.0350926	0.0519595	0.00393437	0.00690717	0.0293139	0.042582	0.0218952	0.0271146	0.0162598	0.0225514	0.00531956	0.0145371	0.0275323	0.00771739	0.0371266	0.0266127	0.0277694	0.0445974	0.0488937	0.047585	0.00479274
DG(35:04)_[M+H-H2O]1+	585.488	0.2125	0.2125	2	0.0055148	0.00718617	0	0.00235287	0.00391558	0.00677879	0	0	0.00760872	0.00622803	0.00467361	0.00890233	0	0.00327649	0	0.002943	0	0	0	0.00854358	0.00404168	0	0	0	0	0.00332591	0	0.00670172	0.00430592	0	0.0225631	0.00466594	0.0028421	0.00515976	0.00260665	0	0.00310535	0.00392672	0.00975429	0.00424866	0.0108246	0.00636825	0.00426976	0.00982121	0.0126602
DG(36:01)_[M+H-H2O]1+	605.551	0	0	2	22.8494	18.2136	22.3194	18.8647	18.8573	15.7424	24.2153	24.5663	17.1911	17.9049	21.614	15.5464	16.9098	15.4511	15.9364	20.357	19.0548	24.6466	19.3897	17.8298	23.8862	25.5236	25.1802	19.0728	19.5423	18.5254	17.6964	17.9726	18.187	15.9236	23.6504	16.1412	14.2422	25.9457	18.6133	18.6785	19.0442	18.4681	24.8273	24.7159	23.3161	23.0501	17.0774	24.002	15.328
DG(36:02)_[M+H-H2O]1+	603.535	0	0	2	37.5677	21.4257	37.0638	21.8998	28.6809	48.5017	271.594	268.204	19.5135	21.3668	36.1672	18.9903	24.6152	23.5472	24.5337	23.8474	22.3338	40.1685	28.7647	57.9463	38.5824	278.253	39.9244	28.8566	29.5218	27.8005	20.8464	21.1341	26.8285	24.4904	253.445	24.3031	43.2827	41.4893	21.7559	22.0882	21.9334	21.4855	40.5499	39.5702	37.0349	37.2751	26.4091	261.803	18.6649
DG(36:02)_[M+NH4]1+	638.572	0.4	0.575	1	0	0	0	0	0.00447352	0.0395	0.0104846	0.0105188	0	0.00207025	0.00576059	0	0	0	0.00650913	0	0	0	0	0.00614986	0	0.0125784	0.00456894	0	0	0	0	0	0.00875869	0	0.038304	0.00607465	0.0522775	0	0	0.00377246	0	0	0	0.00538475	0.0061681	0	0.00486675	0.0222842	0.00522082
DG(36:03)_[M+H-H2O]1+	601.519	0	0	2	12.1819	4.37172	11.9194	4.68611	6.04336	24.2367	130.131	128.545	3.61977	4.42252	12.2993	4.12116	4.59281	4.63699	4.78153	5.31881	4.77633	13.4272	5.87846	26.1598	12.4144	139.494	13.775	6.27071	6.06132	5.84186	4.37697	4.43476	5.24631	4.82428	120.18	4.6964	20.997	14.1111	4.38158	4.64766	4.52204	4.56599	13.9087	14.3132	12.5661	12.3038	5.1932	132.237	4.07213
DG(36:04)_[M+H-H2O]1+	599.504	0	0	2	1.93031	0.82059	1.82014	0.886708	1.17597	15.4804	34.2489	32.8999	0.641002	0.798735	1.78227	0.978884	0.918668	0.86684	0.848622	1.01185	0.924739	2.08521	1.10455	18.6108	1.88297	36.8997	2.16196	1.19852	1.16728	1.06637	0.796162	0.796597	1.01775	0.885592	30.0754	0.830672	13.478	2.22131	0.869203	0.857289	0.880908	0.798734	2.35736	2.07297	1.85391	1.8077	0.943256	36.9989	0.926563
DG(36:05)_[M+H-H2O]1+	597.488	0	0	2	0.280745	0.0872987	0.2923	0.0742205	0.114133	1.98645	1.22645	1.02439	0.0577516	0.0906623	0.298274	0.143169	0.0408034	0.0531562	0.0685592	0.124412	0.114935	0.271037	0.0518947	2.57817	0.246595	1.54606	0.232282	0.0810619	0.0901422	0.0661965	0.0874178	0.0934209	0.0871624	0.0620785	0.883738	0.0666128	1.75287	0.186988	0.0700019	0.0707307	0.0723667	0.0733814	0.173707	0.23132	0.229677	0.251319	0.0838493	1.67757	0.0998945
DG(37:01)_[M+H-H2O]1+	619.567	0	0	2	0.383363	0.303411	0.379615	0.296118	0.33353	0.19139	1.47461	1.02443	0.284324	0.287236	0.333779	0.267762	0.382837	0.30288	0.316422	0.318806	0.303263	0.399407	0.353889	0.26279	0.366308	1.33147	0.331953	0.439586	0.388168	0.374096	0.282855	0.286124	0.359795	0.26959	0.965442	0.317704	0.205726	0.365926	0.311097	0.297528	0.299476	0.291246	0.36586	0.294143	0.30339	0.356933	0.345723	1.34647	0.237534
DG(37:02)_[M+H-H2O]1+	617.55	0	0	2	0.289761	0.23829	0.259764	0.255677	0.353203	0.200568	0.105576	0.0661091	0.216727	0.242478	0.277192	0.206431	0.239423	0.268294	0.289573	0.264557	0.264919	0.339191	0.365406	0.233543	0.305055	0.093219	0.336322	0.333587	0.375357	0.341659	0.231631	0.246418	0.294122	0.29303	0.0828403	0.298899	0.210711	0.347316	0.240378	0.243685	0.252232	0.251872	0.326359	0.318182	0.32033	0.301519	0.319015	0.0690678	0.210299
DG(38:01)_[M+H-H2O]1+	633.582	0	0	2	0.483359	0.46363	0.508569	0.463896	0.577473	0.618302	0.18282	0.222454	0.434758	0.448539	0.442118	0.415997	0.47358	0.444389	0.470953	0.506841	0.458792	0.514262	0.573264	0.802344	0.500253	0.173585	0.52388	0.601442	0.564332	0.54554	0.423363	0.438372	0.547878	0.482713	0.187137	0.48418	0.573766	0.565102	0.481177	0.476239	0.46771	0.452589	0.526078	0.479956	0.493842	0.487782	0.499505	0.14156	0.382709
DG(38:02)_[M+H-H2O]1+	631.566	0	0	2	0.169703	0.155089	0.154348	0.165746	0.292388	0.536241	0.450883	0.401421	0.120799	0.162494	0.19708	0.149059	0.194946	0.174418	0.20728	0.226155	0.189772	0.204744	0.28397	0.770784	0.159665	0.561694	0.221636	0.286982	0.329747	0.25854	0.132633	0.164729	0.222313	0.193718	0.497259	0.198871	0.464721	0.270073	0.14122	0.162316	0.17299	0.135405	0.225884	0.204377	0.158989	0.113405	0.268886	0.609574	0.153621
DG(38:03)_[M+H-H2O]1+	629.551	0	0	2	9.81826	10.7022	10.1369	10.4965	9.462	11.4214	0.0467084	0.0545061	9.3828	11.1838	10.5968	13.2964	8.99925	11.9089	11.6882	8.91242	10.0783	8.82044	8.37485	8.32104	9.4636	0.0536097	8.90593	7.73934	8.89132	9.81985	11.0987	10.9416	8.9072	11.6271	0.196082	11.3052	12.9489	8.06778	10.6604	10.335	10.3621	10.8825	8.93203	9.47189	9.65611	10.0609	10.4275	0.0477656	13.3803
DG(38:06)_[M+H-H2O]1+	623.504	0.0375	0.1125	2	0.0115122	0.00691121	0.00768011	0.00227662	0.00830225	0.0792386	0.0226281	0.0174453	0.00402713	0.00960093	0.0203014	0.0215464	0.026638	0.0112078	0.00882158	0.00345749	0.00854279	0.011795	0.00980612	0.100414	0.0361628	0.0359055	0.00720057	0.0056245	0.0133435	0	0.00512244	0.0118533	0.0278802	0.0129331	0.0580407	0.00857674	0.0551559	0.0127014	0.0137121	0.00803444	0.00571568	0	0.0398393	0.0141085	0.00897067	0.0344588	0.0155525	0.00960241	0.0160875
DG(39:00)_[M+H-H2O]1+	649.613	0.1875	0.4125	2	0.00993256	0.00257117	0.0293782	0.0123891	0.00728462	0.00442877	0	0.0134338	0.00311728	0.00913402	0.00279414	0.00263807	0.00643708	0.00320326	0	0.0153863	0.00966782	0	0.0028888	0.00749091	0.00936846	0.00347291	0.00883663	0	0.0028344	0	0.00690458	0.00491058	0	0.0030777	0	0.00322829	0	0.00331755	0.00934342	0.0192054	0.00684116	0.0106303	0.0106343	0	0.00407645	0.00683845	0	0.0112233	0.00246293
DG(39:03)_[M+H-H2O]1+	643.567	0	0.175	2	1.3866	1.6908	1.48707	1.54521	1.54935	1.29939	0.0170533	0.0103377	1.49317	1.70794	1.43142	1.94862	1.46743	1.86843	1.89967	1.45	1.63368	1.26566	1.4504	1.06293	1.293	0.0158226	1.19254	1.33395	1.4322	1.61433	1.68274	1.63352	1.46478	1.95614	0.00805338	1.79569	1.47089	1.11153	1.66207	1.57316	1.5769	1.59993	1.23306	1.23684	1.28092	1.45338	1.68379	0.00524347	1.94269
DG(39:05)_[M+H-H2O]1+	639.535	0.3375	0.35	2	0	0.00373038	0.00455252	0	0.00588757	0	0.0249251	0.0001544	0	0.00209452	0.00300164	0.00456713	0	0	0	0.00199906	0	0.00417522	0	0	0	0.0136062	0	0.0049547	0	0.00307944	0.00184771	0.00193461	0	0	0.0267275	0	0.0023795	0.00553636	0.00285423	0	0	0.00356643	0	0	0.0030139	0.00434596	0.00702634	0.00759613	0.00670759
DG(40:01)_[M+H-H2O]1+	661.613	0.05	0	2	0.0334578	0.0488943	0.0121565	0.0504336	0.0569751	0.224301	0	0	0.0141888	0.0515212	0.0107992	0.0228566	0.00411746	0.0137443	0.0381524	0.052443	0.0442453	0.0606082	0.0376894	0.300104	0.0329067	0	0.0458725	0.0167733	0.0420145	0.0514949	0.0380132	0.032874	0.0259951	0.0070074	0	0.0273874	0.178571	0.0338357	0.0461614	0.037342	0.0386831	0.0442388	0.0381947	0.0313176	0.029526	0.0219948	0.0361851	0.0288527	0.0173019
DG(40:02)_[M+H-H2O]1+	659.597	0	0	2	0.423615	0.513309	0.411369	0.512172	0.410302	0.375047	0.0138581	0.0248619	0.456123	0.524768	0.435914	0.611331	0.379109	0.532009	0.550089	0.448541	0.509876	0.334396	0.367495	0.298195	0.437765	0.0672847	0.367324	0.230757	0.41257	0.42867	0.546843	0.511683	0.430635	0.501523	0.0132036	0.549159	0.4563	0.334521	0.50351	0.547056	0.510351	0.498301	0.380706	0.376974	0.425687	0.422718	0.444152	0.03964	0.647564
DG(40:03)_[M+H-H2O]1+	657.582	0	0.1125	2	16.1936	21.363	16.6766	21.6906	18.306	19.4034	0.0187775	0.0764016	19.4895	22.3327	18.2375	25.8853	16.7107	22.3405	22.3575	18.8947	20.9513	15.1247	16.6187	15.2262	16.1601	0.0286497	15.797	14.2409	16.9793	18.4972	22.8129	22.4555	17.455	21.4966	0.504713	21.3856	22.1642	14.4699	20.8275	21.3512	21.303	22.0009	15.656	16.6042	16.922	17.4354	20.3069	0.0134961	26.3212
DG(40:06)_[M+H-H2O]1+	651.535	0.025	0.2	2	0.0901322	0.160858	0.0589728	0.127693	0.0733895	0.193168	0.0301117	0.0309275	0.068354	0.156553	0.142823	0.22066	0.0133732	0.112354	0.152374	0.117952	0.138526	0.0238686	0.0141284	0.0705868	0.0826491	0	0.093725	0.0217243	0.0576622	0.0888323	0.16986	0.157015	0.0284305	0.141353	0.0136789	0.114463	0.201467	0.0627957	0.139266	0.135453	0.123413	0.144436	0.0621129	0.12203	0.110907	0.0943559	0.141391	0	0.203284
DG(41:02)_[M+H-H2O]1+	673.613	0.175	0.225	2	0.00468692	0	0.00477593	0.00813145	0	0.00478214	0	0.0347256	0.00600098	0.0100513	0.00214927	0.00330264	0.00200921	0.0152907	0.0198788	0.0112471	0.00549609	0.015042	0	0.00540662	0.0189002	0.0618687	0.00479812	0.014801	0.00779236	0.0115588	0.00763756	0.00428973	0	0.00339362	0	0.0109449	0.00818885	0.00296246	0.00204886	0.00517106	0.0203569	0.00673025	0.00993437	0.00201377	0.00540224	0	0.00958372	0.0276466	0.0194687
DG(41:03)_[M+H-H2O]1+	671.598	0.05	0.2375	2	1.9184	2.10672	1.91479	2.05753	1.88107	1.61624	0	0	1.83779	2.00051	1.88371	2.26109	1.75841	2.27888	2.08257	1.87902	2.06274	1.73962	1.75564	1.42796	1.78358	0.0185286	1.71901	1.49203	1.79223	1.8857	2.05254	2.09591	1.86218	2.30262	0	2.16614	1.74485	1.71688	2.06727	2.06039	1.97063	2.02249	1.84254	1.82337	1.85578	1.92696	1.94934	0	2.28738
DG(41:04)_[M+H-H2O]1+	669.582	0.025	0.2375	2	1.14445	1.16449	1.1574	1.1601	1.13874	0.934187	0.00524448	0	0.971157	1.16576	1.08693	1.32718	0.978433	1.4137	1.29297	1.05282	1.09414	1.00802	1.07021	0.794119	1.06187	0	1.00601	0.864928	1.03572	1.20354	1.16879	1.14732	1.00729	1.44773	7.20181e-05	1.35665	1.07188	0.956536	1.16313	1.12863	1.09171	1.1254	1.07061	1.02207	1.05601	1.08173	1.24417	0.009743	1.37116
DG(42:03)_[M+H-H2O]1+	685.613	0	0.0875	2	16.5005	19.2943	16.9276	19.6025	14.3584	16.1404	0.0296377	0.0247386	17.5888	19.7316	18.4747	22.2885	12.9777	17.572	17.4828	17.692	19.3087	15.2788	13.7012	13.4425	16.6819	0.0333342	16.812	11.3617	13.5987	14.7897	20.177	19.9177	13.7106	17.4884	0.552953	16.9469	18.2057	15.5719	18.5222	19.3603	19.2045	19.8893	16.6585	17.1149	17.7417	17.6429	16.0097	0.0540254	22.9238
DG(42:04)_[M+H-H2O]1+	683.598	0	0.15	2	17.1846	18.06	17.825	17.9339	17.3785	13.6181	0.0192379	0.0415334	14.8033	18.1229	18.9553	20.9336	13.7453	20.3347	20.5415	15.9042	17.525	15.9576	15.7722	11.1081	16.5057	0.0149183	16.528	13.309	16.1046	17.6043	18.3907	18.2639	15.2445	20.4375	0.0108835	19.1181	15.4189	15.416	17.509	17.6805	17.4335	18.0238	16.6822	17.131	17.6151	17.6855	18.6938	0.0263382	21.2459
DG(42:06)_[M+H-H2O]1+	679.566	0	0.0125	2	0.584214	0.550129	0.648741	0.551252	0.445541	0.636119	0.0253071	0.0193274	0.393689	0.561462	0.592708	0.622865	0.306577	0.584051	0.555711	0.476266	0.535893	0.533902	0.393107	0.514563	0.530214	0.0134119	0.532067	0.271031	0.404762	0.506009	0.555724	0.553208	0.293851	0.590066	0.120956	0.55206	0.723564	0.438885	0.546349	0.520489	0.509284	0.532654	0.523658	0.529516	0.575233	0.584531	0.469284	0.0347216	0.671089
DG(42:07)_[M+H-H2O]1+	677.55	0.1375	0.2	2	0	0.00451382	0.00781557	0.00974165	0	0.0146846	0.0305899	0	0.00351792	0.00951878	0	0.0180729	0	0.0027403	0.00487727	0.00823673	0.00716946	0.0058467	0	0.0047026	0.0022341	0	0.00100769	0.0137736	0.00267589	0.00287427	0.00915292	0.0131683	0.0106817	0.00331392	0	0.00190092	0.0171182	0	0.00697205	0.00816135	0.00635402	0.00944159	0.00390528	0.012114	0.00573087	0.00488479	0.00806966	0.0301749	0.0181127
DG(43:03)_[M+H-H2O]1+	699.629	0.05	0.2125	2	1.76748	1.54891	1.76099	1.46363	1.28342	1.11731	0	0	1.34594	1.44514	1.81016	1.59991	1.16545	1.51509	1.44154	1.39893	1.49107	1.67742	1.31251	1.06694	1.72368	0	1.68653	1.04924	1.27096	1.36011	1.49429	1.45878	1.29502	1.57355	0.00861179	1.44711	1.19357	1.66792	1.51568	1.52309	1.45685	1.46569	1.84367	1.71578	1.73336	1.79188	1.34882	0	1.64163
DG(43:04)_[M+H-H2O]1+	697.613	0.0125	0.2375	2	1.47406	1.22978	1.54604	1.24618	1.29192	0.985621	0.0068618	0.0266728	1.08565	1.26609	1.4718	1.38389	1.10047	1.54485	1.47559	1.15218	1.22417	1.33836	1.20453	0.89824	1.37333	0.020909	1.36699	1.02005	1.20976	1.33118	1.29953	1.29949	1.17315	1.58667	0.0134411	1.4516	1.10823	1.33801	1.30686	1.29632	1.20615	1.26468	1.42402	1.4245	1.45188	1.50437	1.38233	0	1.39202
DG(47:00)	796.776	0.0375	0.25	2	0.0157414	0.133649	1.5816	0.121822	0.0765637	0.0445892	0	0.00796072	0.14385	0.142207	0.0445191	0.145786	0.0271122	0.0541878	0.114353	0.113802	0.117181	0	0.0264457	0.0129201	0.035216	0	0.0676596	0.00674575	0.05197	0.0561509	0.12084	0.127599	0.0491367	0.0286675	0.000380227	0.0592997	0.0476898	0.0355047	0.082626	0.125674	0.165227	0.168221	1.70083	0.0682181	0.0645456	0.0127479	0.0714381	0.0251684	0.129094
DG(47:01)	794.76	0.0375	0.1625	2	0.0442752	0.142868	0.0251436	0.164748	0.106655	0.0855144	0	0.00602395	0.125543	0.186915	0.198383	0.204	0.0730108	0.105742	0.14362	0.153252	0.173113	0.0691063	0.0648825	0.0220927	0.107431	0.000201285	0.144752	0.0139759	0.101809	0.0605385	0.191162	0.191892	0.0692719	0.0595573	0	0.0897585	0.0978672	0.110235	0.0900526	0.178425	0.200154	0.185361	0.0603877	0.16178	0.141579	0.0724941	0.147174	0	0.20863
LPC(16:00)	496.34	0.1625	0.5	1	0.0082363	0.00224316	0.00379499	0	0.00717959	6.82133	0.0148092	0.0244231	0.00334501	0	0.0015735	0.00307936	0.00339489	0.00649856	0.00930036	0	0.00156563	0.00731885	0.00618128	6.09583	0.00250791	0.00893503	0	0.0344919	0.0108831	0.0112904	0	0.00299781	0.0053397	0.0124745	0.00828627	0.00399231	7.53185	0.0075502	0.00386603	0	0.0016108	0.00143793	0	0	0	0	0.0124138	0.00481141	0.00296708
LPI(20:04)_[M+NH4]1+	638.33	0	0.075	2	0.486927	0.247367	0.466351	0.132295	0.298674	0.160187	0.6968	0.678579	0.0923742	0.179551	0.453391	0.161958	0.193334	0.476816	0.405619	0.0701083	0.0908615	0.337494	0.396655	0.233208	0.443016	0.415677	0.309753	0.288045	0.322056	0.364722	0.0983436	0.123623	0.265341	0.336323	0.609627	0.343913	0.213843	0.344563	0.179447	0.113698	0.1114	0.123402	0.283417	0.263554	0.337161	0.394711	0.412955	0.461046	0.0770913
PA(23:00)	523.34	0	0.0375	2	0.0103457	0.0281855	0.0232291	0.0346227	0.0395302	0.243565	0.0971811	0.120774	0.0281568	0.0371373	0.0145606	0.0340438	0.0143772	0.0380381	0.0371116	0.034222	0.0218004	0.0137506	0.0338823	0.00385731	0.031135	0.0756889	0.0255441	0.0212186	0.0542489	0.0395377	0.0309372	0.0221231	0.0188297	0.0237055	0.0293673	0.0251657	0.255207	0.0112067	0.0298621	0.0234325	0.021817	0.0521541	0.0186835	0.0213724	0.0186206	0.0280247	0.0435756	0.0531126	0.0260539
PA(26:00)	565.387	0.4375	0.2	2	0.0123774	0	0.00569333	0	0	0.00207585	0	0.0144619	0.00403136	0	0.0058318	0.00284021	0	0	0.0095635	0.00248235	0	0.00957069	0	0.00840927	0	0.0197098	0	0	0.00409721	0.0036811	0	0	0	0	0	0.00711184	0	0	0	0	0	0.00252435	0	0.00800799	0.00374068	0	0.00197366	0.0180004	0
PC(30:00) & PE(33:00)	706.539	0.0375	0.2375	2	0.0451355	0.0870112	0.0233444	0.0467545	0.241404	0.146784	0	0	0.116381	0.0616646	0.00390583	0.069119	0.24447	0.214909	0.222853	0.0592035	0.0372093	0.0502609	0.283456	0.144032	0.0410445	0.0292881	0.0186028	0.499164	0.283616	0.285161	0.0402368	0.0478535	0.280049	0.151155	0	0.228384	0.120019	0.0229321	0.0959078	0.0824894	0.089075	0.0449696	0.00848281	0.0229739	0.00841461	0.0280139	0.259391	0.00793029	0.0148017
PC(32:00) & PE(35:00)	734.57	0	0.2125	2	0.488932	0.123798	0.439386	0.0522693	0.232913	0.440205	0.0205412	0.0284196	0.115985	0.0661133	0.272087	0.055996	0.159026	0.17793	0.171087	0.0673658	0.051261	0.451535	0.276392	0.439686	0.326082	0.0283185	0.282414	0.49806	0.269714	0.233922	0.0538215	0.062612	0.263768	0.146997	0.0235409	0.16912	0.37446	0.375388	0.0604224	0.0831611	0.100345	0.0687968	0.275701	0.249687	0.261745	0.242478	0.233288	0.0125971	0.0273797
PC(34:01) & PE(37:01)	760.586	0	0	2	0.996243	0.264002	0.957975	0.157922	0.457964	1.83902	2.72625	2.19562	0.271895	0.18298	0.635445	0.202584	0.437554	0.314925	0.378221	0.168148	0.172528	1.04846	0.523928	1.7918	0.781253	2.81755	0.661696	0.780328	0.491736	0.449909	0.1692	0.162889	0.438196	0.300937	1.55109	0.293753	1.68257	0.728925	0.162613	0.222871	0.219414	0.171352	0.602556	0.589877	0.572789	0.586326	0.453824	2.49674	0.120531
PC(34:02) & PE(37:02)	758.57	0	0	2	0.248716	0.0293995	0.260614	0.0060047	0.126467	3.53534	2.62435	2.40076	0.0205954	0.0235354	0.173672	0.0196105	0.0729855	0.0684089	0.101593	0.00744719	0.00602613	0.313885	0.116997	3.37515	0.252924	3.29632	0.197505	0.133993	0.137208	0.0996229	0.0126477	0.0162607	0.0862776	0.0536453	1.73105	0.0732737	3.30453	0.207096	0.00841973	0.0361549	0.0255347	0.00863041	0.170057	0.195353	0.136427	0.15191	0.112127	2.78212	0.0150078
PC(36:01) & PE(39:01)	788.617	0.025	0	2	0.0774228	0.0239274	0.0687681	0	0.00647663	0.306624	0.671572	0.608829	0.00613149	0.00743309	0.0422902	0.011019	0.0079051	0.00741521	0.0120085	0.00172857	0	0.0699538	0.0111409	0.324026	0.0569178	0.679682	0.032761	0.0150409	0.00805649	0.00958671	0.00382509	0.00793835	0.0152868	0.00812351	0.232694	0.00694579	0.233846	0.0642313	0.00311007	0.00993391	0.00528698	0.00603215	0.0378294	0.0191535	0.027707	0.0210757	0.0129895	0.646306	0.00470494
PC(36:02) & PE(39:02)	786.601	0	0	2	0.534084	0.0894769	0.542688	0.0471701	0.154411	2.05047	7.66436	6.27576	0.0789165	0.049493	0.282879	0.0612997	0.288842	0.0559497	0.0880772	0.0373967	0.0308922	0.542218	0.152909	2.29768	0.372904	8.95598	0.313058	0.237216	0.174262	0.157024	0.0496851	0.0388119	0.145957	0.0872326	4.1889	0.0948952	1.88234	0.397106	0.0268622	0.0708327	0.0704601	0.0527643	0.299287	0.280074	0.254956	0.276536	0.134745	7.93895	0.0278537
PC-O(30:05) & PC-P(30:04)	682.481	0	0	2	1.50243	0.761864	2.11731	0.456254	1.2982	0.569185	4.15479	3.38183	1.6464	0.614347	1.63284	0.635625	2.00322	1.0039	0.946613	0.49651	0.501217	1.53523	1.47116	0.631912	1.33548	2.74293	1.13586	1.83946	1.50631	1.49447	0.759784	0.7362	2.10164	1.13694	3.08802	0.936307	0.416372	1.27673	0.900205	0.540242	0.494049	0.609751	1.26141	1.24094	1.48162	1.51803	1.41361	2.00708	0.572941
PE(34:00) & PC(31:00)	720.554	0.325	0.4625	2	0	0	0.00446228	0.00333407	0.00491839	0.00176216	0.00966255	0	0	0.0014595	0.0050901	0	0	0.00235842	0.00255536	0	0	0.00773651	0.0105589	0.00555755	0.0030371	0.0132634	0	0	0.0067938	0.00290702	0.00184837	0	0.00604739	0.00462927	0	0.0118687	0.00184484	0	0	0.00187544	0	0	0	0	0	0.00322189	0	0	0
PE(34:01) & PC(31:01)	718.539	0.1375	0.1875	2	0.0242336	0.00277729	0.019869	0.00142512	0.0230669	0.00261762	0	0.0385838	0	0	0.0147212	0.00899499	0	0.0123965	0.0209627	0.00235454	0.00310862	0.0509298	0.0312261	0.0070395	0.0233546	0	0.0102016	0.0270687	0.0186297	0.0236518	0.00210985	0	0.0032989	0.0117924	0.0151225	0.0113269	0.00371328	0.00768554	0	0	0.00856047	0	0.0283537	0.0302651	0.0148534	0.00846864	0.0169244	0	0
PG(34:01)_[M+NH4]1+	766.559	0.425	0.9375	1	0	0	0	0	0	0.103473	0.00693417	0.0264262	0.000118181	0	0.00296078	0.00360451	0.000314486	0	0	0	0	0	0.000153525	0.0861394	0	0.0270092	0	0.223812	0.00247447	0.00673679	0	0	0.00425338	0	0.0182847	5.85045e-06	0.0686744	0	0	0	0	0	0	0	0.00254116	0.00284725	0	0.00830281	0
PI(40:04)_[M+NH4]1+	932.622	0.3625	0.95	1	4.94469e-06	0	0.000205082	0	2.25912e-05	0	0.0083593	0.0102561	7.0942e-05	0	0.00165587	0.00117464	9.16017e-05	0.00132206	0.00157287	2.1876e-05	0.0003275	0.000165281	0.00126152	0	0	0.0424727	0.000137919	0.010915	0.000538419	8.01933e-05	0	9.37243e-05	0.00215941	0.00248707	0.00144531	0	0	3.51273e-05	0	0	0	0	0	0	0	0	0	0.000355478	0
PS(36:01)_[M+H]1+ / PG(36:03)_[M+NH4]1+	790.559	0.2625	0.7125	1	0.0167987	0	0.0144089	0	0	0.0175323	0.0196414	0.0100716	0.000815928	0.00509997	0.0109458	0	0.712591	0.00265558	0	0.00163402	0	0.0233165	0	0.0263233	0.0218814	0.0116202	0.00994247	0.0170178	0.00315768	0.00316639	0.00213659	0	0.330839	0	0.0070778	0.0107564	0.0239104	0.0224565	0	0	0	0	0.0182686	0.0187291	0.00725615	0	0.00254924	0	0.00226087
SM(27:00)	607.481	0.3125	0.175	2	0.014948	0	0.0164556	0.00559491	0	0.00557144	0.0263221	0.020439	0	0	0.0173708	0	0.00729387	0.00606568	0.00669554	0.00273514	0.00196933	0.00942235	0	0.00929059	0.00419399	0.00291342	0.00367148	0	0.00682213	0	0.0038548	0	0	0	0	0	0.00284487	0.00318546	0.00744675	0.00405606	0	0	0	0	0.00356459	0.00262606	0	0	0
SM(29:00)	635.512	0.05	0.075	2	0.0450576	0.0153522	0.0244629	0.0082431	0.0192167	0.0330621	0	0.0215469	0.0307838	0.0168397	0.0225065	0.0146663	0.0282148	0.0280624	0.0201943	0.00906316	0.00970541	0.0466126	0.01061	0.0182337	0.038381	0	0.0175922	0.0244959	0.0149446	0.0196358	0.0119605	0	0.00405336	0.00361094	0.0459233	0.00960254	0.0214074	0.0225183	0.0219023	0.0135996	0.00716438	0.0103174	0.0191298	0.0145936	0.00192139	0.0186499	0.016046	0.0110538	0.00227455
SM(34:01)_[M+H]1+	703.575	0.0625	0.225	2	0.770217	0.110173	0.768015	0.0785251	0.205727	1.75921	0	0	0.189149	0.0995898	0.565157	0.104576	0.240736	0.203455	0.200746	0.0978787	0.0763761	0.756317	0.238578	1.89831	0.623678	0	0.454179	0.387181	0.231235	0.224429	0.0578591	0.0848932	0.226424	0.140703	0	0.166831	1.6798	0.507055	0.123639	0.10597	0.0965071	0.0631028	0.480498	0.42449	0.432734	0.462465	0.230633	0	0.0453572
SM(36:01)_[M+H]1+	731.606	0.025	0	2	0.122768	0.05543	0.138289	0.0802849	0.0541174	0.178033	0.0117409	0.00458603	0.0208609	0.0639994	0.117217	0.0841782	0.00732914	0.0695164	0.0799884	0.0657283	0.0705044	0.109438	0.0262694	0.182655	0.104453	0	0.086252	0.0198637	0.0323101	0.053779	0.0893489	0.0718122	0.017895	0.0635314	0.000201379	0.0597162	0.169004	0.120822	0.040681	0.0617533	0.0587385	0.0591836	0.0880706	0.0922986	0.0928085	0.0662941	0.0732338	0	0.0890523
SM(38:01)_[M+H]1+	759.638	0.0125	0	2	0.0351119	0.0193111	0.036888	0.0295456	0.0345864	0.143907	0.0131668	0.0239215	0.0111825	0.0387052	0.066733	0.0170926	0.0112629	0.0300306	0.0512548	0.023793	0.0166273	0.0637023	0.0284921	0.0888642	0.0559985	0.0145094	0.0679874	0.0645904	0.0504468	0.0367759	0.0227544	0.0341928	0.0336531	0.0252534	0.0134962	0.0208667	0.140217	0.0491419	0.0127439	0.0188378	0.0327067	0.0425517	0.0473913	0.0616869	0.0751659	0.0742176	0.0456132	0	0.0411258
SM(38:02)_[M+H]1+	757.622	0.125	0	2	0.0122717	0.00199726	0.00854182	0.00374819	0	0.0146178	0.0348098	0.0385273	0.00541056	0.00179814	0.00247332	0	0.0043373	0.00380553	0.00215645	0.0021103	0.00182261	0.00412179	0.00350337	0.00707588	0.00337127	0.0277442	0.0188909	0	0.0029151	0.00224926	0.00307893	0.00166734	0.0030184	0	0.144788	0	0.015489	0.0120575	0.00646206	0	0	0.00212866	0.00417642	0.00256468	0	0.0104521	0.00555597	0.0109682	0
SM(40:01)_[M+H]1+	787.669	0.0375	0.0875	2	0.276042	0.0701359	0.233676	0.030891	0.119998	0.337871	0	0	0.0555226	0.042327	0.219234	0.0466749	0.0736763	0.0670271	0.122471	0.0540685	0.0436336	0.273062	0.119812	0.415462	0.236064	0	0.191855	0.190004	0.151208	0.134908	0.0407826	0.0543368	0.0828834	0.0865971	0.0048511	0.0554356	0.313079	0.205116	0.0571543	0.0448085	0.0596968	0.0612407	0.172566	0.185695	0.182027	0.189065	0.116388	0.0109462	0.0401624
SM(40:02)_[M+H]1+	785.653	0.2875	0.0625	2	0.00770506	0.00257929	0.00391609	0	0.00860476	0.205075	0	0	0.00323335	0	0	0	0.00392283	0	0	0.00225336	0	0.00673537	0	0.174727	0.0110463	0	0	0.00677247	0	0.00543646	0.00223091	0	0	0	0	0	0.157856	0.0186023	0.00356221	0.0023491	0	0.00216397	0.00339316	0.00890978	0.0029048	0.00368265	0	0.0109546	0
SM(42:02)_[M+H]1+	813.684	0.2	0.225	2	0.0528927	0	0.0398513	0	0	0.44372	0	0.0228075	0	0	0.0230684	0.00158049	0	0	0.00736567	0.00246918	0.00258127	0.0475005	0.00866487	0.521679	0.0296485	0	0.0190194	0.0153054	0.00301205	0.00246666	0	0	0	0.00913285	0.00788545	0.00593788	0.41071	0.0420174	0.00284793	0	0.00200088	0.00160756	0.0290581	0.0352633	0.0152194	0.0182327	0	0	0.00149513
SM(44:00)_[M+H]1+	845.747	0.0375	0.0625	2	0.540714	0.402994	0.489337	0.415709	0.424197	0.431524	0	0	0.30999	0.366836	0.510002	0.367406	0.258799	0.450619	0.446153	0.4391	0.381929	0.501693	0.422854	0.435661	0.520246	0.0115663	0.52159	0.291183	0.420671	0.443033	0.421895	0.395314	0.359065	0.489922	0	0.452968	0.430869	0.496724	0.345079	0.39295	0.401681	0.402542	0.545234	0.514453	0.525015	0.533824	0.47175	0.00807988	0.398568
SM(44:01)_[M+H]1+	843.731	0.025	0.225	2	0.0685253	0.0781003	0.0357728	0.0993805	0.0686993	0.0731021	0	0	0.0355658	0.0766201	0.077597	0.0846333	0.0114107	0.0847724	0.0844625	0.0918524	0.0930644	0.0450043	0.0485302	0.0762953	0.0657426	0.0152303	0.107854	0.0107666	0.0337093	0.0549766	0.0806738	0.0998472	0.0326023	0.0648152	0.00164694	0.0699347	0.137256	0.0658913	0.0470658	0.0798238	0.0874197	0.0828128	0.0612485	0.120133	0.071727	0.0611372	0.0758136	0.0105083	0.0686821
SM(44:02)_[M+H]1+	841.716	0.0875	0.25	2	0.00883337	0.00518232	0.0113575	0.00232162	0.00525879	0.010257	0	0	0.0101424	0.00670311	0.00552328	0	0	0.00785112	0.0187307	0.010143	0.013148	0.0147378	0.00726481	0.0115273	0.00918507	0.0261996	0.0123374	0.0185048	0.00235968	0.00629542	0.00161721	0.00361461	0.00907307	0.00286199	0	0.00279506	0.00949102	0.00627468	0.00952227	0.00691515	0.00466706	0.00398346	0.00738828	0.00501439	0.0117698	0.0139372	0.011172	0.0154724	0.00612174
SM(46:00)	873.778	0	0	2	1.21887	0.661321	1.35567	0.721604	0.810452	3.63173	6.70142	6.29686	0.542346	0.656243	1.23629	0.680308	0.519535	0.832331	0.75811	0.782432	0.72299	1.18874	0.846139	4.68836	1.28101	6.18137	1.31475	0.627905	0.82407	0.844499	0.743344	0.689531	0.700609	0.859292	6.75668	0.760022	3.68463	1.31845	0.663776	0.706302	0.716531	0.714714	1.3304	1.22353	1.25602	1.25216	0.819802	7.15997	0.644164
SM(46:01)	871.763	0	0	2	0.175516	0.160899	0.184358	0.18225	0.168992	0.624688	0.316454	0.398042	0.0972782	0.15572	0.23777	0.162248	0.0427031	0.169817	0.171435	0.18506	0.179194	0.219512	0.176234	0.789456	0.216191	0.319052	0.251449	0.0873511	0.174773	0.175333	0.166044	0.176031	0.109708	0.16261	0.420943	0.168074	0.670203	0.218751	0.149821	0.171381	0.179344	0.181218	0.220784	0.236322	0.253874	0.244038	0.177367	0.469643	0.168255
SM(47:00)	887.794	0	0	2	0.0202909	0.0098484	0.0260982	0.0217974	0.0231361	0.0597981	0.0807814	0.121107	0.00930639	0.0168765	0.0640041	0.0155914	0.00293511	0.0241963	0.0315129	0.0281745	0.0217844	0.0356761	0.0167054	0.0431201	0.045716	0.106147	0.0628631	0.00711335	0.0103078	0.0254585	0.0184406	0.0251344	0.00855837	0.0204124	0.110778	0.0207866	0.0588842	0.044156	0.00723563	0.0200299	0.0233169	0.0138813	0.0459502	0.0512396	0.0339062	0.0246113	0.0281587	0.0784143	0.0217875
SM(48:01)	899.794	0	0	2	0.780954	0.358942	0.77496	0.346698	0.427104	7.15673	28.2006	28.788	0.268536	0.322116	0.759533	0.318295	0.277251	0.442037	0.412761	0.384127	0.33658	0.768075	0.445972	8.81786	0.790795	27.3392	0.8112	0.301486	0.463725	0.424468	0.340606	0.355348	0.333968	0.472691	28.7239	0.423499	7.18943	0.854399	0.329753	0.356074	0.37746	0.361717	0.85942	0.767066	0.807265	0.815922	0.441059	30.557	0.320614
TG(30:00)_[M+Na]1+	577.444	0.0625	0.1375	2	0.687507	0.200735	0.664458	0.0744214	0.249443	0.361326	0	0	0.308657	0.121132	0.422815	0.188107	0.552439	0.411896	0.220893	0.125359	0.165242	0.70746	0.222291	0.182408	0.485816	0	0.37541	0.427466	0.23557	0.23286	0.0959591	0.0925332	0.241684	0.293039	0	0.293111	0.208396	0.437392	0.367275	0.160845	0.0741913	0.0731016	0.373375	0.333016	0.34968	0.525355	0.213206	0	0.0795291
TG(34:00)	628.552	0	0.075	2	26.1133	28.0967	26.989	27.6155	25.2757	29.928	0.0104837	0.0755242	26.0496	29.9545	29.4512	34.8629	24.0727	31.2651	31.1614	23.4113	26.7432	23.5252	22.0585	22.3288	25.4467	0.00966218	24.2294	20.55	23.3152	25.6574	29.2402	28.6116	23.6384	30.0474	0.839335	29.7977	33.7336	21.7168	28.1074	27.4546	27.3259	28.3821	23.5576	25.8715	26.4565	26.6394	28.3488	0.0025699	35.05
TG(35:00)	642.567	0.025	0.2125	2	3.54671	4.21887	3.60877	4.1019	3.95319	3.33061	0	0.0153881	3.8205	4.28308	3.59441	5.04363	3.78209	4.83251	4.66778	3.66735	4.1175	3.31726	3.60762	2.78091	3.23216	0.0333879	3.08684	3.26396	3.64202	4.01313	4.31737	4.21478	3.83763	4.79105	0.0497032	4.60171	3.81356	2.99781	4.30769	4.11858	4.06556	4.15861	3.33183	3.22146	3.46588	3.4117	4.15317	0	5.12347
TG(36:00)_[M+Na]1+	661.538	0.025	0.15	2	1.47408	1.05578	1.33819	0.77658	1.27056	0.914278	0	0.0260768	1.51958	0.799306	0.790214	0.748345	1.98589	1.34195	1.05383	0.905828	0.891778	1.52653	1.38865	1.13671	1.09556	0.0174662	0.971383	1.87364	1.26084	1.20393	0.714866	0.730346	1.31648	0.988198	0.0105456	1.126	0.760993	1.2117	1.55484	0.911896	0.730825	0.736052	0.899298	0.802874	0.798407	1.01672	0.964577	0	0.549105
TG(36:00)_[M+NH4]1+	656.582	0	0	2	40.9341	51.9497	42.5683	51.679	44.6616	45.6361	0.0496166	0.396058	47.061	52.3194	45.4012	59.9396	41.4208	53.5978	52.7705	45.9873	50.6644	37.571	41.2033	37.9374	40.2129	0.0161493	39.9484	35.8844	42.2022	45.3456	52.5876	52.1169	43.4451	53.093	1.75027	51.6245	51.7678	36.7084	50.9794	50.9315	50.5399	52.4818	39.4056	40.5471	41.9798	42.7721	48.5634	0.132311	61.2768
TG(36:03)	650.536	0.0375	0.2375	2	0.43796	0.407433	0.468416	0.42788	0.378548	0.551095	0	0	0.32318	0.45862	0.461107	0.555023	0.20008	0.448877	0.442591	0.373472	0.432225	0.381139	0.350275	0.366876	0.395889	0	0.351256	0.202995	0.320028	0.390149	0.462117	0.456169	0.281214	0.474157	0.00989527	0.418908	0.633419	0.326767	0.455775	0.418187	0.401018	0.424801	0.344198	0.396614	0.43219	0.423957	0.379728	0.0127204	0.550561
TG(37:00)_[M+Na]1+	675.553	0.0375	0.175	2	0.0864906	0.0709721	0.0913197	0.0444161	0.0716785	0.140116	0.0297142	0	0.0768684	0.0385994	0.0380459	0.0259357	0.172192	0.0892282	0.0745326	0.0527628	0.0451719	0.127153	0.100025	0.151175	0.0873392	0	0.0746495	0.0615111	0.0831555	0.0603201	0.0240239	0.0283436	0.0430615	0.0354207	0	0.0636085	0.149124	0.0934858	0.128987	0.0371109	0.0307807	0.0271256	0.0586967	0.056079	0.0565669	0.0809222	0.0501282	0.0141465	0.0165771
TG(37:00)_[M+NH4]1+	670.598	0.0125	0.2375	2	4.50678	5.02392	4.75345	5.03841	4.53786	3.87032	0.00809972	0.0210918	4.3814	4.93152	4.64464	5.55817	4.03271	5.39354	5.14546	4.47493	4.86129	4.09211	4.13728	3.32286	4.30551	0.0148566	4.16123	3.6678	4.20772	4.49948	5.05201	5.06132	4.37536	5.52825	0.0702159	5.10846	4.28689	4.01195	4.94471	4.94829	4.80178	5.02697	4.31773	4.28196	4.46603	4.65728	4.67085	0	5.65406
TG(37:01)	668.583	0.0375	0.225	2	2.63634	2.72157	2.7313	2.79501	2.77241	2.28936	0.0116223	0.0246706	2.35367	2.81447	2.66589	3.20584	2.41131	3.35361	3.18548	2.48724	2.72259	2.53388	2.60113	1.95536	2.44977	0	2.37472	2.39532	2.61274	2.86267	2.81259	2.75391	2.62543	3.42919	0	3.14252	2.56425	2.2486	2.81759	2.76087	2.69101	2.78155	2.51041	2.46257	2.53656	2.7224	2.96655	0	3.23201
TG(38:00)_[M+Na]1+	689.569	0.0375	0.225	2	1.24992	0.770695	1.20727	0.621625	0.849379	0.605522	0.00962804	0.0172311	1.17117	0.602895	0.762596	0.565774	1.31552	0.894341	0.750806	0.721602	0.672147	1.30986	1.01141	0.823988	0.990503	0	0.870213	1.17652	0.889926	0.828152	0.554344	0.575889	0.921315	0.68792	0	0.77889	0.546261	1.10947	1.16892	0.706627	0.608824	0.570685	0.812416	0.755986	0.759108	0.969392	0.714839	0	0.430311
TG(38:00)_[M+NH4]1+	684.614	0	0.0125	2	38.7416	44.2944	40.456	44.6707	34.6587	36.9143	0.0096054	0.480951	41.0662	44.8934	43.7358	50.2753	31.211	41.0513	40.4364	40.9791	43.7564	35.88	32.1563	31.3506	39.9217	0.00358018	39.4834	26.2575	32.7557	35.1142	45.7155	45.4197	33.827	40.4762	1.66333	39.8616	40.9932	36.5168	42.9204	44.2667	44.252	45.066	39.0997	40.2261	42.0025	42.4186	37.7962	0.073111	50.8886
TG(38:01)_[M+Na]1+	687.553	0.05	0.1	2	1.23089	0.719508	1.17938	0.543016	0.991434	0.579581	0	0.0207713	1.04956	0.632315	0.682471	0.577698	1.55247	1.06318	0.865847	0.587505	0.634519	1.33345	1.11894	0.689218	0.985909	0	0.891255	1.4161	0.997665	0.978691	0.511129	0.531199	1.04476	0.862895	0	0.904057	0.487227	1.09163	1.17334	0.648718	0.51152	0.540651	0.792906	0.765434	0.754025	0.923425	0.820934	0	0.396668
TG(38:01)_[M+NH4]1+	682.598	0.0125	0.0625	2	40.5249	41.9466	42.0954	41.9268	41.1169	32.0103	0.0107184	0.257419	35.5093	41.9944	44.2541	47.175	33.1102	47.7957	46.9224	37.7258	41.0589	37.3607	37.1337	26.002	40.6591	0.0214549	40.0034	30.8397	38.3007	41.5913	42.7703	42.616	36.5178	47.7512	0.0929227	45.3465	35.5708	36.7376	40.7167	41.4988	41.2323	41.9164	39.2413	40.8456	42.0986	42.8796	43.5342	0	47.9852
TG(38:03)	678.567	0.05	0.1375	2	1.44163	1.31186	1.52658	1.24448	1.19058	1.49391	0	0	0.977679	1.33226	1.43689	1.52923	0.799546	1.43089	1.33753	1.17172	1.28843	1.29369	1.03041	1.26833	1.25827	0	1.21544	0.93542	1.08014	1.22693	1.31281	1.28836	0.916982	1.48761	0	1.31334	1.69132	1.12971	1.28725	1.31665	1.20164	1.32003	1.34214	1.30287	1.396	1.41031	1.22902	0.0100765	1.535
TG(38:04)	676.552	0.0625	0.2125	2	0.0346449	0.061879	0.0480008	0.0716799	0.0196217	0.109311	0	0.0148466	0.0125314	0.104562	0.0432953	0.11615	0	0.032687	0.050515	0.0401891	0.0804892	0.0284195	0.00945975	0.0469174	0.050237	0	0.0342612	0.0189632	0.0236695	0.0304626	0.0838406	0.0758518	0	0.0512369	0	0.0349175	0.119966	0.0275556	0.0456284	0.0875278	0.0679893	0.0837116	0.00824254	0.0523476	0.0499425	0.03429	0.0361223	0.0164023	0.143158
TG(38:05)	674.536	0.4125	0.3875	2	0	0.00306752	0.00350094	0.0018337	0	0	0	0.000133979	0.000928827	0	0	0	0.00824686	0	0	0.00251324	0	0.00460901	0.00188665	0.00680468	0.00714435	0	0	0	0.00413469	0	0	0.00196782	0	0	0.0134368	0	0.00655674	0	0.00482264	0	0.00112345	0.002695	0	0	0	0.0113577	0.00419554	0.0117119	0
TG(39:00)_[M+NH4]1+	698.629	0.0375	0.225	2	4.03329	3.41613	4.21122	3.34506	2.81856	2.48796	0	0.0261953	2.99042	3.20765	3.9618	3.57637	2.47308	3.47842	3.1106	3.1523	3.29192	3.69454	2.80072	2.35907	3.8055	0	3.78465	2.39522	2.74704	2.95471	3.38829	3.33887	2.85689	3.4469	0.0332918	3.28535	2.69651	3.73729	3.42279	3.33669	3.23697	3.32752	3.91938	3.75588	3.91902	4.14953	2.9794	0	3.58962
TG(39:01)_[M+Na]1+	701.569	0.0875	0.2125	2	0.027074	0.0132316	0.0100533	0.0023216	0.029782	0.198453	0.0162012	0.0152186	0.0260874	0	0.00145827	0	0.0299756	0.0065562	0.0178256	0.00818339	0.00191879	0.0278953	0.0194571	0.203733	0.0244576	0.0320237	0.0159566	0.00732723	0.0233729	0.0068046	0	0.00205324	0.00481237	0	0	0.0146136	0.202736	0.00747596	0.0253455	0.00806477	0.00203832	0.00191863	0.00932321	0.00281032	0.00733594	0.0179236	0.00586187	0	0
TG(40:00)_[M+Na]1+	717.6	0.0125	0.2375	2	0.944638	0.430345	0.866257	0.312247	0.434441	0.316117	0.0439693	0.0514815	0.665862	0.301754	0.564011	0.280793	0.606	0.417764	0.383708	0.406348	0.339344	0.944266	0.547117	0.461086	0.763043	0.0375599	0.648563	0.601345	0.449105	0.431501	0.289095	0.302672	0.470023	0.33747	0	0.395585	0.300601	0.870201	0.629973	0.371701	0.318145	0.301057	0.624009	0.564332	0.590843	0.721144	0.356593	0.0258657	0.215573
TG(40:01)_[M+Na]1+	715.585	0.0125	0.2375	2	0.888295	0.416794	0.828078	0.31864	0.572512	0.31221	0.0361493	0.0186009	0.639978	0.327506	0.492686	0.303626	0.746748	0.559233	0.451005	0.391005	0.36547	0.98813	0.651963	0.467706	0.736027	0.0479166	0.636603	0.713688	0.525394	0.556231	0.295164	0.330851	0.55922	0.400251	0.0100552	0.472715	0.2819	0.85816	0.702432	0.398633	0.294122	0.313922	0.572524	0.532547	0.540737	0.662654	0.430564	0	0.237063
TG(40:02)_[M+Na]1+	713.569	0.0125	0.225	2	0.445886	0.190123	0.41651	0.141737	0.298166	0.161003	0	0.0328853	0.293673	0.157352	0.264996	0.151162	0.415405	0.299802	0.267869	0.16278	0.177896	0.534865	0.305922	0.188652	0.381551	0.0210963	0.305282	0.379636	0.307224	0.266905	0.127666	0.128629	0.241828	0.244534	0.0111436	0.260566	0.144007	0.441675	0.328591	0.175003	0.130561	0.125279	0.278787	0.30464	0.267975	0.39734	0.218297	0.00807051	0.0761092
TG(40:04)	704.583	0.0125	0.2375	2	0.821941	0.608183	0.86088	0.625114	0.599462	0.777211	0.0163952	0.0148145	0.422647	0.642009	0.920817	0.740395	0.351518	0.739222	0.75202	0.572544	0.633235	0.763491	0.508319	0.724923	0.797982	0.0184568	0.804526	0.36069	0.595094	0.636511	0.641608	0.637843	0.402619	0.820635	0.00941252	0.675322	0.834957	0.735936	0.618253	0.621731	0.636605	0.64055	0.775501	0.840807	0.885013	0.905776	0.693213	0	0.767828
TG(40:05)	702.567	0.0375	0.2375	2	0.0284985	0.0537458	0.0464318	0.0518494	0.0297306	0.0890209	0	0	0.0146774	0.0576368	0.0535165	0.086562	0.0076546	0.0447211	0.0594395	0.0488399	0.0686348	0.0235188	0.0180615	0.0543606	0.0344525	0.0248475	0.032604	0.00810736	0.0216716	0.0150051	0.0612591	0.0587842	0.00554303	0.0455003	0.0166719	0.0293979	0.131282	0.0265472	0.0382418	0.0670745	0.0645075	0.0721793	0.0413319	0.0694785	0.066976	0.0476362	0.0395764	0.00546388	0.0988629
TG(41:00)_[M+NH4]1+	726.661	0	0	2	3.88066	2.46323	4.11578	2.49081	1.99994	1.65859	0.246322	0.111319	2.22082	2.32028	3.78743	2.55034	1.88263	2.36345	2.21198	2.41024	2.3955	3.56011	2.10551	1.70945	3.72623	0.630699	3.72912	1.89322	2.02421	2.06633	2.41405	2.42088	2.02709	2.4369	0.292292	2.33608	1.79108	3.64808	2.42776	2.47172	2.47915	2.40519	3.85041	3.65196	3.82402	3.99844	2.12496	0.167143	2.49069
TG(41:01)_[M+Na]1+	729.6	0.2	0	2	0.0203287	0.00244462	0.00480679	0	0.00722472	0.0699272	0	0	0.00488185	0.00290062	0.013664	0.00364285	0	0.00331839	0.00455085	0.00226179	0.00188	0.0130727	0.00422368	0.0230798	0.0246045	0	0.0158006	0	0.00429382	0	0.00596091	0.00189694	0	0.00363595	0.00579376	0.00938921	0.0478554	0	0.00552298	0	0	0	0.00461087	0.00749829	0.00260326	0.00402466	0.00599661	0.0168202	0
TG(42:00)_[M+Na]1+	745.632	0.0375	0.2125	2	0.757235	0.269539	0.668527	0.216954	0.300426	0.158892	0	0	0.456976	0.209599	0.417457	0.205084	0.346042	0.292957	0.249855	0.262126	0.222787	0.758768	0.350066	0.273941	0.579927	0.0138471	0.517898	0.441082	0.283205	0.263963	0.188086	0.212077	0.288609	0.249183	0	0.240547	0.179822	0.642842	0.408897	0.249072	0.228437	0.223062	0.45253	0.446175	0.462241	0.55358	0.229474	0.00981106	0.158902
TG(42:01)_[M+Na]1+	743.616	0.0125	0.0375	2	0.684173	0.215627	0.570358	0.164701	0.256608	0.157938	0	0.00040917	0.376545	0.189435	0.356259	0.144978	0.341058	0.264102	0.224402	0.200905	0.187126	0.688523	0.33296	0.234064	0.491515	0.0260341	0.479702	0.440346	0.312175	0.240604	0.151455	0.140012	0.220295	0.165739	0.00926195	0.236242	0.13613	0.606832	0.352083	0.192904	0.142538	0.156655	0.396236	0.388888	0.404594	0.503793	0.191308	0.00960121	0.0884361
TG(42:02)_[M+Na]1+	741.6	0.025	0.2	2	0.266641	0.0625077	0.208947	0.023436	0.0700762	0.0617174	0.0489243	0.0262077	0.106724	0.0354435	0.104756	0.0263142	0.0798953	0.0960048	0.0548749	0.0382389	0.0490323	0.308574	0.112497	0.0625091	0.212474	0.0304878	0.187213	0.0665087	0.0706939	0.0987564	0.0238976	0.0307428	0.0277154	0.0509199	0	0.0495011	0.0295224	0.314714	0.112868	0.0382158	0.0211014	0.032381	0.171924	0.135355	0.119803	0.220265	0.0365575	0	0.0112859
TG(42:03)_[M+Na]1+ / SM(37:04)	739.585	0.2125	0.225	2	0.00905492	0	0.0139389	0.00202803	0.00243319	0	0.0204863	0	0.00911797	0.00198846	0	0	0.00772689	0	0.00579869	0	0.00183252	0.0231259	0	0	0.00942757	0	0.00505857	0.0128403	0.0125494	0	0	0.00337107	0.00457686	0	0.00852991	0	0.00375677	0.0140093	0.00748173	0.0030313	0.00165131	0.00398784	0.0108424	0.0131104	0.00268126	0.01386	0	0.0200591	0
TG(42:05)	730.598	0.025	0.15	2	0.225735	0.201799	0.25794	0.186613	0.209365	0.252142	0	0.0101893	0.0954794	0.202769	0.269065	0.235929	0.062142	0.276352	0.25832	0.184374	0.20152	0.204422	0.135673	0.198345	0.196387	0	0.228684	0.0561557	0.172152	0.215037	0.193478	0.198562	0.128028	0.271621	0.248053	0.220588	0.275834	0.223181	0.172642	0.189108	0.193109	0.197516	0.267658	0.278392	0.287926	0.273218	0.253491	0.0193488	0.248956
TG(42:06)	728.583	0.1875	0.3125	2	0.019009	0.00216219	0.00459952	0.00382437	0	0.00407676	0.0299217	0.00991313	0.00646366	0	0.013872	0.00636979	0	0.00268823	0.00319451	0.00239414	0	0.00460198	0.00694611	0	0.00726353	0.0137737	0.00299612	0.012949	0.00277739	0	0	0.00561975	0	0.00528904	0.0199675	0.0036513	0.0196211	0	0.00155807	0.00481168	0.0072389	0.00348134	0	0.000761254	0.00256631	0.0121356	0.014274	0	0.004221
TG(43:00)_[M+NH4]1+	754.692	0.025	0.2125	2	2.34302	1.96984	2.367	2.05645	1.58925	1.26781	0.00997998	0.009496	1.80966	1.99117	2.63585	2.13074	1.39004	1.72988	1.72559	1.94245	1.96559	2.17492	1.54013	1.08669	2.45571	0	2.57372	1.27508	1.54436	1.57992	2.06187	2.06658	1.58049	1.67551	0	1.73153	1.40842	2.43948	1.78753	1.94274	2.00502	2.11044	2.41997	2.60078	2.54019	2.49245	1.67538	0.00855177	2.09188
TG(43:01)_[M+Na]1+	757.632	0.1625	0	2	0.0122717	0.00199726	0.00854182	0.00374819	0	0.0146178	0.0412962	0.0426996	0.00541056	0.00179814	0.00295232	0	0.0043373	0.00124282	0.00204413	0.0021103	0.00182261	0.00412179	0.00350337	0.00707588	0.00337127	0.0336181	0.0188909	0	0	0.00224926	0.00307893	0.00191983	0	0	0.144788	0.00473788	0.015489	0.0120575	0.00646206	0	0	0.00212866	0.00420273	0.0026679	0	0.0109479	0.00239876	0.0109682	0
TG(43:04)_[M+NH4]1+	746.629	0.025	0.2375	2	0.260377	0.0837576	0.18426	0.075264	0.0892372	0.0349388	0.0126909	0.0434626	0.204627	0.055753	0.154824	0.0430268	0.0927343	0.0642971	0.0907475	0.0957199	0.0692606	0.282583	0.0994624	0.0742973	0.231436	0	0.234707	0.149476	0.0921812	0.0733831	0.0518174	0.0523933	0.0824193	0.0496281	0	0.0352214	0.0231465	0.288115	0.161364	0.0633257	0.0617342	0.059929	0.168682	0.18001	0.17718	0.218102	0.0750441	0.0144746	0.0313874
TG(43:05)	744.614	0.025	0.15	2	0.309959	0.0604963	0.250765	0.0582639	0.0731692	0.027412	0.000132148	0	0.13319	0.0460383	0.122844	0.0282465	0.0767076	0.059489	0.0630083	0.0621595	0.0513794	0.324808	0.142571	0.0620826	0.221927	0	0.200644	0.0942369	0.0899691	0.0574794	0.048468	0.0474929	0.043924	0.0539623	0.0174144	0.0500215	0.0406321	0.269913	0.148533	0.0424685	0.0323357	0.0352187	0.166903	0.173964	0.181693	0.200545	0.0574107	0.00855572	0.0194205
TG(44:00)_[M+Na]1+	773.663	0.0375	0.225	2	0.477805	0.25218	0.519096	0.193226	0.261523	0.134377	0.0282425	0	0.433377	0.203231	0.371639	0.201957	0.310069	0.276165	0.247951	0.250005	0.213712	0.509228	0.337912	0.229555	0.466208	0	0.41161	0.447764	0.285942	0.271337	0.163768	0.195579	0.265089	0.211013	0.0113145	0.25504	0.146752	0.502964	0.363982	0.207525	0.213752	0.200208	0.367981	0.35226	0.362378	0.421187	0.229833	0	0.142415
TG(44:01)_[M+Na]1+	771.647	0.05	0	2	0.763953	0.213664	0.695781	0.181473	0.277745	0.157174	0	0	0.393746	0.181122	0.451993	0.146693	0.328922	0.283864	0.260161	0.221677	0.194255	0.802937	0.352242	0.25083	0.658838	0	0.582975	0.385268	0.297793	0.26278	0.158522	0.162735	0.278384	0.183481	0.0150701	0.220759	0.151708	0.734412	0.357974	0.190293	0.166069	0.177649	0.49456	0.487794	0.479916	0.640207	0.246012	0	0.0923561
TG(45:00)_[M+NH4]1+	782.723	0.0625	0.2375	2	1.7345	2.00974	1.72786	1.91303	1.80401	1.10407	0	0	1.9495	1.83293	1.66736	1.91755	1.76991	2.01414	1.90147	2.0201	1.9366	1.66616	1.97298	1.2476	1.66751	0	1.68888	1.79656	1.89189	1.86037	1.89488	1.88213	1.91457	2.05462	0	2.054	1.20543	1.73687	1.814	1.9705	2.00118	1.95624	1.75147	1.5744	1.73866	1.79454	1.88518	0	1.84089
TG(45:01)_[M+NH4]1+	780.708	0	0.05	2	2.41389	1.67906	2.52148	1.66855	1.5194	1.08724	0.0178846	0.0255149	1.41648	1.51102	2.32515	1.61589	1.29331	1.75901	1.68933	1.68198	1.63376	2.31806	1.68461	1.1607	2.35732	0.0427655	2.42449	1.33863	1.64121	1.64395	1.62053	1.66022	1.51592	1.88536	0.0102173	1.77063	1.13628	2.4193	1.58377	1.68256	1.66297	1.65148	2.49607	2.31197	2.40944	2.51643	1.64129	0.0234568	1.61901
TG(45:02)_[M+NH4]1+	778.692	0.0375	0.175	2	1.10427	0.46639	1.09491	0.488585	0.4617	0.344141	0	0.0163349	0.363466	0.463445	1.04476	0.461579	0.324122	0.536934	0.45721	0.474136	0.482408	1.0327	0.467891	0.347483	1.02932	0.0112105	1.1205	0.313032	0.462235	0.461705	0.492402	0.481435	0.411755	0.556554	0	0.50275	0.380894	1.0682	0.449129	0.478655	0.489932	0.444032	1.14584	1.02598	1.11206	1.08691	0.507405	0	0.4807
TG(45:04)_[M+NH4]1+	774.661	0.025	0	2	0.177623	0.116373	0.125718	0.0533989	0.0764925	0.0168269	0.0326544	0.0118935	0.189644	0.0599297	0.102372	0.0455125	0.079249	0.082437	0.0865184	0.105207	0.0565077	0.2048	0.117742	0.0664549	0.170897	0	0.151909	0.0739896	0.0949014	0.0628234	0.0430253	0.0605484	0.0580543	0.0106116	0.0242132	0.0578904	0.0238976	0.191728	0.15219	0.0517581	0.0602888	0.0545041	0.108353	0.0948745	0.111339	0.126939	0.0544306	0	0.0196719
TG(45:05)_[M+NH4]1+	772.645	0.025	0.15	2	0.373666	0.0799932	0.299391	0.0574081	0.105307	0.0341783	0.0107995	0	0.187206	0.0749611	0.204633	0.0365295	0.086708	0.08512	0.0766457	0.0963769	0.0669569	0.390667	0.102201	0.0459034	0.307443	0	0.277611	0.102494	0.104006	0.0981127	0.0524718	0.0397235	0.0710614	0.0524872	0.0058211	0.0780936	0.037369	0.37405	0.131987	0.0667791	0.0622397	0.0638073	0.240992	0.230045	0.240787	0.276471	0.0664644	0.0258349	0.0108119
TG(45:06)	770.63	0.1	0.1	2	0.108931	0.0027181	0.0971831	0.00233088	0.0143134	0.00370754	0.041651	0	0.0207505	0.00195935	0.042891	0.00207883	0.00303617	0.011052	0.0216831	0	0.00271379	0.104289	0.00324911	0.00527287	0.0939437	0.0484759	0.0974847	0.0161492	0.00716346	0.00236821	0	0.00207072	0.00775853	0.00647894	0	0.0064874	0.00749365	0.120121	0.00790033	0.00430083	0.00794241	0	0.057968	0.0687117	0.0675827	0.090008	0.00306613	0	0.00215097
TG(46:00)_[M+NH4]1+	796.739	0	0	2	8.67845	13.6271	8.78596	13.1711	11.3576	6.45767	0.0515842	0.0495622	12.7185	12.2803	8.35204	12.9129	10.8269	12.2253	11.9421	13.8151	12.9735	8.08139	11.8867	7.14666	8.86286	0.018262	8.70291	10.7739	11.3241	11.637	12.8773	13.1014	11.7297	12.2085	0.435743	12.2954	6.93292	8.68284	12.0467	13.1622	13.7823	13.3681	8.51732	8.27957	8.83139	8.90161	11.5645	0.0113241	12.5705
TG(46:01)_[M+Na]1+	799.679	0.025	0.1	2	0.327985	0.205831	0.280652	0.165179	0.27071	0.105583	0	0	0.375389	0.146919	0.199492	0.12321	0.249582	0.26403	0.242016	0.187291	0.188124	0.349479	0.352257	0.182752	0.263642	0.013807	0.291104	0.413613	0.271603	0.249018	0.119799	0.134413	0.247126	0.169373	0.0263949	0.175573	0.0954386	0.358474	0.302439	0.161378	0.143625	0.154416	0.210424	0.214328	0.202848	0.242695	0.187465	0.0233326	0.0667705
TG(47:00)_[M+NH4]1+	810.755	0.0375	0.0875	2	1.29608	1.83933	1.27539	1.82413	1.81212	0.996719	0	0.012558	1.76524	1.64185	1.16848	1.73079	1.78848	1.89795	1.91644	1.89104	1.82584	1.29007	1.94709	1.16758	1.30218	0	1.25821	1.88008	1.83949	1.86295	1.73272	1.75904	1.94661	1.91537	0.0247917	1.92622	1.04734	1.31313	1.73502	1.83343	1.82878	1.78709	1.25837	1.20225	1.29332	1.29817	1.77852	0	1.66278
TG(47:01)_[M+NH4]1+	808.739	0.0375	0.2375	2	1.70405	1.87364	1.79479	1.82152	1.97058	1.18477	0	0	1.65024	1.73007	1.64252	1.7923	1.67336	2.23986	2.11549	1.95437	1.82312	1.70783	2.12089	1.3466	1.75614	0.0168396	1.71862	1.89464	2.07464	2.04986	1.81385	1.81923	1.9943	2.27707	0	2.18994	1.24101	1.73068	1.76274	1.85005	1.86851	1.82311	1.76324	1.66086	1.74847	1.7937	2.09307	0.0126615	1.72144
TG(47:02)_[M+NH4]1+	806.723	0.05	0.2375	2	0.704644	0.548398	0.774857	0.56201	0.593506	0.352371	0.0104701	0	0.442926	0.508679	0.734892	0.546453	0.436114	0.682269	0.644842	0.583721	0.568873	0.676504	0.623396	0.364294	0.726413	0	0.7545	0.406364	0.606629	0.61021	0.539508	0.571005	0.521768	0.72356	0	0.685695	0.376963	0.749715	0.535492	0.552079	0.533796	0.565486	0.77401	0.715581	0.715673	0.755776	0.640506	0	0.545783
TG(47:06)_[M+NH4]1+	798.661	0.0375	0.05	2	0.0737158	0.00233707	0.0594341	0.00683691	0.00868696	0.00790911	0	0.0171845	0.0258008	0.0028725	0.0475938	0.00432569	0	0.0117248	0.0143365	0.0112296	0.00550507	0.117873	0.0229456	0.00648238	0.0978728	0.0572284	0.0839945	0.0134023	0.00937845	0.0154769	0.00654611	0.00375829	0.0101985	0.0147596	0.0234867	0.0139286	0.00201885	0.114787	0.0166419	0.00571001	0.00205744	0	0.0512504	0.0675776	0.0613649	0.0638596	0.0147409	0.0204328	0.00369155
TG(48:00)_[M+Na]1+	829.726	0.0375	0.0875	2	0.206488	0.214676	0.200952	0.1969	0.253587	0.134671	0	0.0102029	0.245907	0.188637	0.157485	0.148407	0.215871	0.225563	0.232727	0.212763	0.196802	0.239274	0.296344	0.25151	0.209922	0.0128138	0.224085	0.3775	0.262209	0.254248	0.155277	0.153653	0.259018	0.162893	0	0.234515	0.153383	0.2481	0.25507	0.186741	0.195153	0.166434	0.154352	0.175042	0.167552	0.16909	0.201248	0	0.120712
TG(48:00)_[M+NH4]1+	824.77	0.0125	0.1125	2	5.21194	9.78375	5.24661	9.31346	8.03983	6.17906	0	0.105221	8.88746	8.34728	4.75084	8.80784	7.89117	8.26609	8.20595	9.89974	9.18786	5.07253	8.92915	7.27393	5.34222	0.0156079	5.13115	8.47859	8.1936	8.36723	8.91581	9.18262	8.37788	8.35841	0.473595	8.45051	6.30134	5.25435	8.44661	9.24953	9.80164	9.31149	5.15078	4.74148	5.25206	5.26579	8.13439	0.0108134	8.36991
TG(48:01)_[M+Na]1+	827.71	0.025	0.1625	2	0.279891	0.223946	0.231967	0.179635	0.315614	0.126341	0	0	0.414909	0.182271	0.185509	0.117981	0.298943	0.3301	0.313308	0.226175	0.187643	0.297154	0.440464	0.235055	0.26104	0.00525866	0.256341	0.547719	0.361802	0.342985	0.152875	0.164236	0.387264	0.245904	0.017197	0.267974	0.148227	0.316486	0.302634	0.196908	0.181279	0.178544	0.197342	0.211384	0.200398	0.256757	0.261509	0.0108543	0.117448
TG(48:01)_[M+NH4]1+	822.755	0	0.025	2	15.0263	18.8261	15.276	18.958	19.4632	11.1241	0.0395053	0.188559	16.1532	17.0891	14.8098	17.8172	15.7034	20.1436	20.4558	19.8431	18.4674	14.4362	20.6076	12.0467	15.6433	0.0259812	15.815	16.8382	20.1893	20.4682	18.17	18.582	18.7909	21.049	0.085627	19.8032	11.6287	15.5878	16.5524	18.5488	19.3425	18.762	15.2745	15.0656	15.3884	15.3418	20.2211	0.0288204	17.3741
TG(48:02)_[M+Na]1+ / SM(43:03)	825.694	0.0375	0.1	2	0.0971086	0.057683	0.0757422	0.0532379	0.0894791	0.0400171	0	0.0389857	0.184386	0.0269668	0.0272945	0.0332723	0.0414313	0.0725532	0.0879102	0.0542126	0.0552621	0.108205	0.13108	0.0185646	0.0813425	0	0.0781983	0.148039	0.110078	0.0659858	0.0318839	0.0333367	0.0943979	0.0581011	0	0.065538	0.0387879	0.136501	0.0786594	0.044938	0.0361705	0.0296437	0.0248932	0.036945	0.0914005	0.0558048	0.0688222	0.0217856	0.00575157
TG(48:02)_[M+NH4]1+	820.739	0.0375	0.0125	2	8.10417	7.05431	8.30828	7.18153	7.7682	5.03121	0	0.0346852	5.82592	6.62122	8.27107	7.00414	5.81568	8.36083	8.31461	7.46216	7.09047	7.92153	8.06286	5.44923	8.26626	0.0190989	8.32321	6.58145	7.97554	7.95793	7.07118	7.04669	7.13211	8.64044	0	8.06515	5.25286	8.35393	6.52125	7.11559	7.3256	7.1142	8.45074	8.17597	8.46469	8.38032	8.22415	0	6.83019
TG(49:00)_[M+NH4]1+	838.786	0.0125	0.225	2	0.908983	1.26452	0.89927	1.16657	1.12242	0.676404	0.0154077	0.0197493	1.15043	1.0433	0.819262	1.09851	1.14345	1.23168	1.14292	1.29574	1.14903	0.891794	1.31865	0.800551	0.913473	0	0.843816	1.22263	1.21602	1.14481	1.15846	1.14198	1.19043	1.18468	0.0124382	1.14831	0.701607	0.916984	1.14449	1.16559	1.22303	1.16234	0.887777	0.815257	0.881396	0.852958	1.13196	0.0256194	1.04666
TG(49:01)_[M+Na]1+	841.726	0.0875	0.2375	2	0.00892466	0.00518232	0.0120625	0.00253543	0.00534116	0.00491361	0	0	0.0101424	0.00670311	0.00578336	0	0	0.00785112	0.0187307	0.010143	0.013148	0.0147378	0.00726481	0.0112607	0.0107718	0.0158048	0.0123374	0.0185048	0.00235968	0.00678515	0.00183786	0.00308453	0.00968247	0.00305181	0	0.00310821	0.00949102	0.00555994	0.00952227	0.0056685	0.00501582	0.00398346	0.00738828	0.00501439	0.0117698	0.0139372	0.011172	0.0167415	0.00612174
TG(49:01)_[M+NH4]1+	836.77	0.0125	0.2375	2	2.54582	2.64117	2.59371	2.62118	3.0574	1.70683	0.104469	0.146874	2.37451	2.44881	2.41238	2.48873	2.5239	3.13534	3.14411	2.84477	2.58964	2.48358	3.32485	1.9312	2.58722	0.0145493	2.5019	2.96097	3.15028	3.13504	2.50739	2.63021	3.02219	3.25789	0.0075991	3.14472	1.76905	2.66244	2.42634	2.62921	2.74053	2.57098	2.57932	2.39557	2.5546	2.59014	3.16638	0	2.40003
TG(49:02)_[M+NH4]1+	834.755	0.025	0.2	2	1.10589	0.872998	1.06275	0.863391	1.03291	0.632187	0.00974737	0.0101286	0.718049	0.796801	1.04229	0.82458	0.794622	1.14768	1.05153	0.903345	0.830256	1.04736	1.07995	0.680255	1.11888	0	1.11901	0.939791	1.05981	1.09802	0.845696	0.853474	0.930933	1.16446	0	1.07734	0.606315	1.12054	0.786541	0.845732	0.915045	0.854697	1.21427	1.02051	1.11099	1.0985	1.05742	0.0166635	0.8056
TG(49:03)_[M+NH4]1+	832.739	0.05	0.175	2	0.142861	0.126328	0.128871	0.165331	0.162323	0.125538	0.00299232	0	0.0905859	0.120583	0.166132	0.134364	0.0454185	0.146722	0.181458	0.174697	0.134246	0.117095	0.119055	0.146975	0.137052	0	0.197235	0.036426	0.150182	0.175035	0.150991	0.153648	0.0858279	0.179912	0	0.167544	0.113794	0.179791	0.111533	0.149815	0.149832	0.170083	0.186705	0.168019	0.183317	0.185726	0.15545	0	0.144887
TG(49:04)	830.724	0.0375	0.2125	2	0.0309445	0.0620237	0.0426961	0.0522647	0.0685865	0.0334301	0	0	0.0856808	0.0317587	0.031154	0.0503693	0.0444674	0.0589408	0.0703564	0.0742581	0.0457811	0.0623255	0.124708	0.0421083	0.0518266	0.0072116	0.0383504	0.0959821	0.0842546	0.105383	0.0379962	0.0327344	0.0692508	0.0562374	0	0.0538316	0.0297204	0.0369279	0.0941683	0.0684488	0.050789	0.0427062	0.0246637	0.0307379	0.0185843	0.0358393	0.0724252	0.0104231	0.0376681
TG(49:06)_[M+NH4]1+	826.692	0.075	0.2375	2	0.0162181	0.0107688	0.0171773	0.0116792	0.0229245	0.00494876	0.00915718	0	0.0369638	0.00664433	0.00734936	0	0.00819241	0.0240084	0.0443863	0.00919871	0.00956676	0.00540311	0.0285715	0.00643403	0.0141608	0	0.0283174	0.00576061	0.0258755	0.0196399	0.0109543	0.0155779	0.00525071	0.00687843	0	0.0237923	0.00446098	0.0387209	0.0193213	0.0124538	0.00723032	0.00142515	0.0152364	0.014156	0.0180967	0.0171566	0.0191932	0.00788321	0
TG(50:00)_[M+Na]1+	857.757	0	0	2	0.210945	0.145623	0.251759	0.130145	0.169058	0.178421	0.521588	0.597717	0.141851	0.112298	0.189659	0.105014	0.103649	0.142988	0.179196	0.154746	0.13804	0.217171	0.196398	0.272266	0.211689	0.472488	0.241267	0.158362	0.167613	0.194602	0.111786	0.136255	0.123701	0.16042	0.637364	0.149555	0.171856	0.251915	0.143388	0.10749	0.138469	0.141237	0.244239	0.224937	0.23308	0.175859	0.137241	0.620388	0.0874517
TG(50:00)_[M+NH4]1+	852.802	0	0	2	3.25728	5.17654	3.20252	4.95493	4.01926	2.39896	0.0388823	0.103146	4.73846	4.39767	2.69971	4.59341	4.00385	3.93562	3.93957	5.45452	4.95724	3.0596	4.49223	2.37092	3.13679	0.035172	3.06002	4.28357	4.11004	4.15417	4.77466	4.89478	4.21446	4.04042	0.154824	4.04064	2.41049	3.19428	4.64493	4.98506	5.30307	4.99791	2.92589	2.80202	3.07211	2.99477	3.93634	0.125232	4.34209
TG(50:01)_[M+Na]1+	855.741	0	0	2	0.479411	0.268802	0.435199	0.222193	0.382337	0.578945	1.42675	1.25905	0.439752	0.206452	0.296448	0.179437	0.361248	0.364484	0.371812	0.307655	0.237877	0.472835	0.500621	0.976129	0.419268	1.53505	0.408101	0.711231	0.447085	0.374076	0.204581	0.217628	0.432008	0.307052	1.19285	0.343126	0.578493	0.461141	0.374082	0.234492	0.246422	0.224759	0.389252	0.310703	0.332102	0.35089	0.32044	1.67064	0.135656
TG(50:01)_[M+NH4]1+	850.786	0	0	2	16.4342	20.8962	16.8344	20.7934	21.1922	26.7369	2.22077	2.25361	18.093	19.2988	16.298	19.7427	17.141	21.0104	22.0141	22.5718	20.4006	16.5132	22.4148	29.6869	17.2037	1.84578	17.3626	19.5485	21.861	21.7613	20.0542	20.6744	20.5703	21.6803	2.27576	21.1064	27.1004	17.3708	18.1967	20.5142	21.6494	20.8799	16.8395	16.6232	17.342	16.624	22.2765	1.93586	18.9301
TG(50:02)_[M+Na]1+	853.726	0	0	2	0.186124	0.0949446	0.149639	0.0802778	0.146134	0.267285	0.39176	0.375085	0.230912	0.0790319	0.122639	0.0386858	0.106443	0.134843	0.193496	0.125814	0.07322	0.252248	0.240843	0.41525	0.17715	0.587676	0.19806	0.278588	0.181503	0.174112	0.047247	0.0728919	0.19061	0.104472	0.330379	0.108513	0.290081	0.238435	0.181719	0.0650471	0.0879631	0.0675065	0.109049	0.139646	0.14124	0.14951	0.138089	0.801999	0.0135089
TG(50:02)_[M+NH4]1+	848.77	0	0	2	12.0022	10.3544	12.3288	10.5871	11.9057	12.8648	3.29812	3.36757	8.35826	9.37915	11.4979	9.51202	8.74483	12.1329	11.9019	11.1402	10.3307	11.7237	12.5613	14.662	12.2871	2.92039	12.5329	10.3608	12.2359	12.3191	10.1956	10.3078	11.0769	12.7441	3.5718	11.7875	12.961	12.5452	9.28648	10.3243	10.6104	10.2879	12.4863	12.007	12.1618	12.0564	12.0642	3.23175	9.35816
TG(50:03)_[M+Na]1+	851.71	0.15	0	2	0.0118462	0.00169437	0.00452664	0.00401126	0.00423806	0.0244109	0.0146087	0	0.0169494	0.00411976	0.00310132	0	0.00401328	0.002584	0.0182419	0.00787502	0.00243429	0.0154256	0.0150463	0.0351621	0.00671602	0.0278744	0.0137338	0.0162918	0.0301045	0.0121722	0	0.00200195	0.00433607	0.00773256	0	0.0047783	0.0282026	0.0236658	0.01396	0	0.00374968	0	0.00367938	0.00402497	0.00282031	0.00297063	0.00302543	0.0232937	0.00315992
TG(50:03)_[M+NH4]1+	846.755	0	0	2	3.67641	2.75343	3.82575	2.75015	3.15129	2.45704	0.877733	0.986234	2.21701	2.53634	3.62227	2.59489	2.26775	3.25859	3.17762	3.02536	2.75157	3.58967	3.30397	2.79295	3.74395	0.565226	3.8133	2.70582	3.13768	3.2864	2.69602	2.68603	2.80266	3.53239	1.05295	3.16175	2.47993	3.92195	2.50116	2.75454	2.75454	2.7533	3.96163	3.66218	3.80358	3.81029	3.217	0.996397	2.57055
TG(50:04)_[M+NH4]1+	844.739	0.05	0	2	0.817441	0.640431	0.85313	0.66427	0.727315	0.682917	0.013109	0	0.478722	0.617989	0.85069	0.638322	0.493694	0.782389	0.723806	0.725154	0.688651	0.816816	0.751075	0.788078	0.838703	0	0.864844	0.505107	0.715467	0.73487	0.684735	0.652263	0.606608	0.839594	0	0.685863	0.748206	0.858813	0.606402	0.664564	0.662996	0.638948	0.904749	0.812729	0.841755	0.856394	0.72529	0	0.638546
TG(50:05)_[M+NH4]1+	842.723	0.025	0.15	2	0.113172	0.16142	0.131241	0.174972	0.150515	0.187791	0.0155221	0.0094315	0.0980144	0.173392	0.175546	0.172919	0.028975	0.165421	0.186595	0.182671	0.166969	0.10914	0.108909	0.165461	0.13772	0	0.205813	0.0364091	0.148857	0.153394	0.166921	0.17	0.0633886	0.194582	0.0486777	0.156765	0.202252	0.200657	0.133513	0.154122	0.143701	0.184249	0.15447	0.2106	0.184359	0.178618	0.159963	0	0.163873
TG(50:06)_[M+NH4]1+	840.708	0.2	0.1625	2	0	0.00191846	0	0.00475045	0.00227086	0.0157186	0	0	0	0.00203526	0.0133792	0	0	0	0.00510333	0.00542708	0.00207745	0.0118065	0.00311445	0.00624909	0.0105096	0.0396985	0.0169951	0	0	0.00687054	0.00231559	0.00349466	0	0	0	0	0.0246403	0.00755131	0.00559841	0.00460599	0.00209364	0.00415155	0.00408844	0.0137444	0.0154137	0.0145621	0.00567136	0.00988629	0.00234538
TG(51:00)_[M+NH4]1+	866.817	0.05	0.25	2	0.406054	0.489636	0.372054	0.453567	0.411686	0.260584	0	0	0.450253	0.428005	0.309567	0.433594	0.386322	0.392404	0.383767	0.513825	0.46714	0.405199	0.461965	0.330109	0.39543	0.0450176	0.370076	0.39616	0.413192	0.431789	0.419701	0.442721	0.409442	0.418003	0	0.429143	0.271659	0.379875	0.440725	0.470929	0.485046	0.472065	0.353018	0.350381	0.40313	0.349297	0.41049	0	0.403111
TG(51:01)_[M+NH4]1+	864.802	0.05	0.175	2	1.91671	1.79948	1.91	1.69932	1.9413	1.17622	0.0133723	0	1.5363	1.51588	1.72953	1.54981	1.66407	1.94165	1.89987	1.90427	1.7621	1.91036	2.23586	1.45341	1.92168	0	1.90355	1.89867	2.00764	2.04665	1.6482	1.69636	1.99707	2.0788	0	1.94639	1.16268	1.94147	1.61953	1.77009	1.77783	1.72911	1.92071	1.71243	1.8438	1.87491	1.8784	0	1.52688
TG(51:02)_[M+Na]1+	867.741	0.55	0.4375	1	0	0	0.00414573	0	0	0.00803927	0	0	0	0	0	0	0.00300682	0	0	0.00223533	0	0	0.00621517	0.00459866	0	0	0.0025293	0	0	0	0	0	0.00585983	0	0	0	0.00617653	0	0.00295143	0.00247516	0	0	0	0	0	0	0.00372814	0	0
TG(51:02)_[M+NH4]1+	862.786	0	0	2	1.92308	1.33814	1.88664	1.29338	1.68343	1.04232	0.028812	0.0793147	1.09183	1.25216	1.77832	1.20362	1.27091	1.76715	1.71651	1.4579	1.32626	1.94749	1.80756	1.2084	1.90523	0.0578212	1.94683	1.57375	1.73039	1.75119	1.33953	1.33168	1.55084	1.87502	0.0641305	1.66654	1.05731	1.93322	1.23966	1.32679	1.35504	1.31691	1.92528	1.81167	1.87088	1.83974	1.78048	0.0714087	1.23353
TG(51:03)_[M+NH4]1+	860.77	0	0	2	0.651509	0.353874	0.664777	0.35218	0.387493	0.306681	0.0297678	0.0291657	0.249725	0.331036	0.631783	0.299076	0.254675	0.454363	0.420693	0.385058	0.335291	0.647505	0.448269	0.35228	0.63524	0.0465549	0.665339	0.283683	0.437906	0.406381	0.314047	0.326456	0.357588	0.433066	0.04048	0.407145	0.320955	0.644594	0.308446	0.345123	0.362967	0.348942	0.706335	0.620497	0.623661	0.641666	0.437079	0.0192335	0.318461
TG(51:05)_[M+NH4]1+	856.739	0	0	2	0.228417	0.138042	0.12594	0.106654	0.19832	0.335292	0.710285	0.60508	0.242077	0.113385	0.149499	0.0798079	0.133133	0.194029	0.211901	0.150978	0.0928362	0.217558	0.29382	0.5545	0.229632	0.816342	0.207294	0.323931	0.210768	0.197833	0.0888938	0.118815	0.218814	0.134369	0.672217	0.171679	0.303545	0.214293	0.183817	0.105171	0.0938985	0.0952297	0.177947	0.13847	0.16537	0.162906	0.177691	1.03316	0.0406016
TG(51:06)_[M+NH4]1+	854.723	0	0	2	0.074055	0.0342769	0.0432149	0.0185485	0.0573398	0.135965	0.141183	0.146525	0.0779042	0.0229957	0.0437991	0.0138657	0.0702382	0.0476114	0.0492651	0.0337368	0.0182374	0.0656237	0.107198	0.216679	0.0955148	0.16477	0.078068	0.119558	0.0798498	0.0513087	0.0146381	0.024187	0.0341011	0.0263755	0.0965084	0.0412505	0.124583	0.110132	0.0636202	0.0231603	0.0186876	0.0141092	0.0379326	0.0290439	0.0421211	0.0534847	0.0471999	0.342853	0.0117993
TG(52:01)_[M+Na]1+	883.773	0	0	2	0.188638	0.10301	0.164367	0.114759	0.15049	0.289376	2.69414	2.57533	0.178384	0.0683245	0.158728	0.0504846	0.0775652	0.108746	0.144886	0.132805	0.0703623	0.230289	0.194249	0.485137	0.225729	2.85565	0.190178	0.200779	0.156737	0.148286	0.064201	0.0860402	0.129963	0.136682	2.42397	0.097545	0.255015	0.187584	0.160554	0.0866366	0.0813867	0.0773775	0.150816	0.162908	0.178512	0.168282	0.126368	2.86585	0.0414496
TG(52:01)_[M+NH4]1+	878.817	0	0	2	8.2653	9.53281	8.40004	9.57715	8.09936	5.47616	7.33279	7.67496	7.97728	8.36916	7.48524	8.39616	6.80165	7.56509	7.78416	10.3005	9.32202	8.14584	9.06542	6.83235	8.33949	6.69411	8.28179	8.11177	8.26068	8.32318	8.88201	8.98015	7.94081	8.06116	8.05377	7.74943	5.58133	8.52374	8.36328	9.23382	9.80517	9.25206	8.28288	7.74989	8.19569	7.86945	7.92008	7.386	8.18354
TG(52:02)_[M+Na]1+	881.757	0	0	2	0.334974	0.139369	0.269741	0.0995448	0.238546	0.760057	4.98425	4.8482	0.291108	0.09517	0.197314	0.0629356	0.180707	0.22318	0.214571	0.188718	0.133133	0.404313	0.366408	1.2778	0.321791	5.80495	0.27358	0.4823	0.308948	0.253504	0.0904963	0.117495	0.252111	0.154567	4.43775	0.150493	0.704211	0.36815	0.173489	0.108355	0.121455	0.107517	0.249771	0.236791	0.244991	0.317584	0.185022	6.33127	0.0431375
TG(52:02)_[M+NH4]1+	876.802	0	0	2	16.8181	13.0242	17.1191	13.4532	15.5006	25.9863	44.2784	44.8048	10.5543	12.1631	16.8722	12.23	11.5553	15.0947	15.9599	14.3419	12.8711	16.8886	16.6758	28.7027	17.7741	39.8344	18.1367	13.5739	16.273	16.1179	12.7473	13.1988	14.2655	16.2259	48.2436	15.0532	26.0901	18.0264	11.6246	12.9768	13.8368	13.1227	17.5112	17.5968	17.5466	16.9863	16.1382	43.2446	12.0526
TG(52:03)_[M+Na]1+	879.741	0.025	0	2	0.108563	0.0249078	0.0856256	0.00422001	0.0563828	0.751226	3.27641	2.89089	0.0537461	0.0153888	0.0471188	0	0.0179857	0.0249329	0.0476208	0.0307901	0.00756758	0.150048	0.0663183	1.15962	0.0925785	3.83404	0.0762616	0.0616948	0.043854	0.0310613	0.00217167	0.0175996	0.034001	0.023795	2.54662	0.0243288	0.667277	0.140914	0.0326645	0.0162345	0.0111389	0.00908606	0.0301504	0.0389064	0.0542896	0.06431	0.0419235	4.00204	0.00212747
TG(52:03)_[M+NH4]1+	874.786	0	0	2	8.13386	4.23371	8.57967	4.40791	5.23213	12.1525	39.489	39.8337	3.39367	3.91552	8.10277	4.04065	3.74689	5.20177	5.28426	4.69648	4.27657	7.99198	5.63558	14.1848	8.38871	36.1155	8.55104	4.42538	5.42015	5.41053	4.22155	4.24014	4.71313	5.547	42.5479	5.14217	12.2836	8.59798	3.85641	4.26895	4.42078	4.29979	8.70622	8.40405	8.4307	8.32402	5.27216	40.3758	3.90358
TG(52:04)_[M+Na]1+	877.726	0.3125	0.225	2	0	0	0	0	0	0.275148	0.617599	0.492636	0	0.00114294	0	0	0	0.00301928	0	0	0.00460924	0.0034451	0.00139588	0.379882	0	0.857637	0.00262321	0.00237538	0	0.00314683	0	0	0	0.00308049	0.462238	0.00306797	0.256362	0.010517	0	0	0	0	0.00841521	0.00251173	0.00368895	0.00633897	0.00129092	1.05746	0
TG(52:04)_[M+NH4]1+	872.77	0	0	2	2.10026	1.15022	2.20846	1.21903	1.32501	6.17386	11.1612	10.9182	0.886971	1.10206	2.0085	1.09856	0.958685	1.34039	1.28504	1.2489	1.191	2.10659	1.40593	7.7278	2.12068	10.7728	2.18506	1.10164	1.38742	1.38013	1.15409	1.13916	1.15686	1.45417	11.0603	1.25174	6.31849	2.2774	1.02658	1.16772	1.19031	1.15656	2.28365	2.08175	2.13828	2.15365	1.36668	11.9175	1.0555
TG(52:05)_[M+NH4]1+	870.755	0	0	2	0.371994	0.29496	0.365128	0.321651	0.308309	1.04192	0.823961	0.822236	0.205959	0.264479	0.410059	0.283827	0.134215	0.318718	0.311537	0.33081	0.296089	0.393664	0.325441	1.35858	0.376667	0.863903	0.431962	0.13215	0.30492	0.337248	0.289157	0.296706	0.239113	0.312967	0.871549	0.28154	1.11242	0.433607	0.242936	0.314643	0.298033	0.311097	0.437492	0.398482	0.416292	0.415638	0.321657	0.948084	0.276058
TG(52:06)_[M+NH4]1+	868.739	0.0625	0.2375	2	0.00533748	0.0170568	0.00504184	0.0202649	0.0244909	0.218412	0	0	0.00513117	0.0121686	0.0266354	0.0261861	0.0102571	0.0125798	0.016982	0.0278612	0.0277991	0.0121744	0.0117466	0.268838	0.032798	0	0.0336628	0.00261949	0.0187791	0.012086	0.0238465	0.0173581	0.00472666	0.00930904	0	0.0170262	0.238043	0.0120002	0.00282019	0.0240383	0.0169256	0.026184	0.0236585	0.0214746	0.0269668	0.0225564	0.0170105	0	0.0269061
TG(53:01)_[M+NH4]1+	892.833	0.0375	0.0125	2	0.530755	0.51862	0.554706	0.491251	0.520256	0.340652	0	0	0.421226	0.439776	0.432677	0.44276	0.45702	0.508416	0.477203	0.562331	0.529361	0.524598	0.612496	0.394398	0.55919	0	0.548919	0.449943	0.548266	0.544243	0.479476	0.497262	0.543347	0.544098	0.00973162	0.507725	0.310552	0.566886	0.512864	0.494391	0.53864	0.477045	0.515888	0.526425	0.527593	0.555843	0.516094	0.0368805	0.436901
TG(53:02)_[M+NH4]1+	890.817	0	0	2	1.03549	0.661601	1.06347	0.657077	0.852187	0.565613	0.165376	0.320997	0.517391	0.578747	0.892269	0.597563	0.65307	0.87627	0.831302	0.688954	0.63722	1.04628	0.969733	0.660264	1.01134	0.154549	0.945903	0.780628	0.88108	0.911581	0.613341	0.662057	0.830987	0.910746	0.31525	0.832667	0.55135	1.06996	0.576562	0.635244	0.673734	0.648403	1.02798	0.962955	0.993697	0.993034	0.897415	0.337674	0.566881
TG(53:03)_[M+NH4]1+	888.802	0	0	2	0.569819	0.288784	0.534858	0.280488	0.40491	0.31859	0.721285	0.879856	0.210851	0.26617	0.549965	0.270879	0.235316	0.402199	0.42689	0.309546	0.282921	0.579284	0.428784	0.399046	0.565394	0.761528	0.578193	0.299438	0.424637	0.440749	0.273121	0.275602	0.338229	0.428067	0.8036	0.376491	0.305234	0.605476	0.245391	0.271709	0.281927	0.2937	0.604082	0.522914	0.557332	0.59195	0.411794	0.90045	0.262304
TG(53:08)_[M+NH4]1+	878.723	0.4875	0.3875	2	0.00714728	0	0	0	0	0.162408	0.293291	0.145418	0	0	0	0	0	0	0.00169548	0	0	0	0.00312987	0.254342	0.00663736	0.344265	0.00168966	0	0	0	0	0	0.00771045	0	0.221796	0	0.172621	0	0	0	0	0	0	0	0	0	0.000457838	0.591651	0
TG(54:02)_[M+NH4]1+	904.833	0	0	2	4.22921	2.93405	4.36934	2.98759	3.24802	2.88337	23.5389	24.0933	2.43226	2.71419	3.75523	2.61202	2.44569	3.19057	3.16541	3.37603	2.98538	4.26829	3.69048	3.61836	4.2422	22.8066	4.25187	3.15186	3.48106	3.39644	2.86545	2.84873	3.06365	3.39607	25.5404	3.10947	2.92134	4.55632	2.71743	2.96431	3.06897	2.96392	4.18116	4.00375	4.11192	4.03991	3.19859	23.4609	2.54178
TG(54:03)_[M+NH4]1+	902.817	0	0	2	6.19455	3.12434	6.2095	3.13401	4.37384	21.2761	160.99	162.94	2.53931	2.85423	5.92465	2.9171	3.32103	4.36852	4.37199	3.43864	3.03328	6.20033	4.8351	24.4728	6.25228	150.847	6.33985	4.0628	4.5296	4.57337	3.07999	3.08861	3.97013	4.53008	173.478	4.22232	21.0332	6.39484	2.83897	3.09544	3.25146	3.12163	6.35064	6.079	6.11342	6.18612	4.5115	156.457	2.82181
TG(54:05)_[M+NH4]1+	898.786	0	0	2	1.28681	0.539199	1.35591	0.590297	0.670003	11.4346	46.1274	45.8022	0.443699	0.52207	1.21688	0.522039	0.451583	0.675365	0.661491	0.605377	0.600518	1.25349	0.745993	13.8986	1.278	43.6092	1.31513	0.583464	0.670249	0.72983	0.546008	0.58214	0.588986	0.722786	46.465	0.674928	11.2292	1.33566	0.493521	0.563952	0.56142	0.5784	1.40494	1.30615	1.25379	1.23758	0.688224	49.1239	0.502056
TG(54:06)_[M+NH4]1+	896.77	0	0	2	0.289971	0.133623	0.310186	0.149075	0.160046	7.95569	8.64605	8.55492	0.0677336	0.111172	0.287143	0.141569	0.0438972	0.153455	0.181909	0.148976	0.141803	0.293385	0.141711	10.0331	0.287455	8.4964	0.335166	0.0813447	0.160066	0.139932	0.136762	0.154774	0.0983685	0.164739	8.39076	0.127986	8.08189	0.335692	0.11476	0.137986	0.130374	0.14305	0.279462	0.310741	0.284494	0.259784	0.173359	9.79422	0.146128
TG(54:07)_[M+NH4]1+	894.755	0.4	0.15	2	0	0	0	0	0.0031499	1.57533	0	0	0	0	0	0.00343176	0	0	0.00115187	0	0	0	0	2.02077	0.0110263	0	0	0	0.0120865	0	0.00378677	0	0	0.0044714	0.00894178	0	1.63588	0.00938255	0	0	0	0.00174407	0.0100205	0.00367156	0.0105816	0	0.00294178	0	0.00154694
TG(55:01)_[M+NH4]1+	920.864	0.025	0.25	2	0.0483584	0.133351	0.0326696	0.115974	0.071936	0.0579108	0	0.0104961	0.0733901	0.0983791	0.0427643	0.105781	0.0335059	0.0551812	0.0948798	0.126547	0.127327	0.0453286	0.0744594	0.0472217	0.0578432	0.0132245	0.0815641	0.0196038	0.0472087	0.0770987	0.124947	0.102062	0.0472221	0.0354315	0	0.0623271	0.0568382	0.0648652	0.0985569	0.141202	0.101293	0.106899	0.0378596	0.0366436	0.0375287	0.0351486	0.0610543	0.0154713	0.0691654
TG(55:02)_[M+Na]1+	923.804	0.3625	0.4	2	0	0	0	0	0	0.038226	0	0	0	0	0.00210531	0.00332104	0	0.00395285	0.00193787	0	0	0.00195083	0	0.0287353	0.0036543	0	0.016981	0	0.00498258	0.00134419	0	0	0	0	0	0.00218393	0.0459038	0.00297528	0	0.0010051	0	0.00146827	0.00975116	0.00415815	0.00681775	0	0	0.0221676	0.000850894
TG(55:02)_[M+NH4]1+	918.848	0.025	0.0375	2	0.0500824	0.0742121	0.0261109	0.101413	0.0814672	0.0680523	0.0156391	0	0.0325602	0.0564863	0.0539658	0.0553229	0.0373271	0.0631472	0.077426	0.0976059	0.0748622	0.0479181	0.105367	0.0587784	0.0545712	0.0105224	0.0423005	0.0241803	0.0953606	0.104325	0.087462	0.106475	0.0585792	0.0860642	0	0.0780777	0.040716	0.0789983	0.0761225	0.0914888	0.105607	0.0918247	0.0617021	0.0650355	0.0552005	0.0710268	0.0896584	0.0206378	0.0700216
TG(55:03)_[M+NH4]1+	916.833	0	0	2	0.00850531	0.038753	0.0285869	0.0422606	0.041534	0.0737827	0.275959	0.347569	0.0120728	0.0252372	0.0181444	0.0264031	0.00902863	0.0579929	0.044862	0.0368234	0.0296188	0.032183	0.0450008	0.0857503	0.0464299	0.155555	0.0404187	0.0191902	0.019399	0.0546842	0.0233638	0.0357199	0.013565	0.0362568	0.284444	0.0262881	0.0432988	0.0333489	0.00452615	0.0302333	0.0366549	0.0330275	0.0275105	0.0422676	0.0324701	0.025043	0.0340795	0.770406	0.0352807
TG(55:05)_[M+NH4]1+	912.802	0.5	0.475	1	0.00412418	0	0	0.00179007	0	0.0105691	0	0	0	0	0.00236437	0	0	0.0105084	0	0.00183778	0.00418666	0	0	0.00419612	0	0.0824332	0	0	0	0	0	0	0	0	0	0	0.00231281	0	0	0	0.00265996	0	0.00380475	0	0.0029908	0.00338536	0.00312935	0.0618601	0
TG(55:06)_[M+NH4]1+	910.786	0.3875	0.125	2	0	0	0.0044906	0.00191414	0	0.00205807	0.0333663	0.0222337	0	0	0.00345617	0	0	0	0	0	0	0.00640432	0.00752668	0.00586883	0.00304462	0.0331036	0.00204493	0.00559267	0	0	0	0	0	0	0.0125904	0	0.00865725	0.00872617	0.00612141	0	0	0.00351584	0	0.00205664	0	0	0.00235903	0.060107	0
TG(55:08)_[M+NH4]1+	906.755	0.3125	0.225	2	0.000261977	0	0.0106412	0	0.00223325	0.0265972	1.08419	0.901148	0	0	0.00612306	0	0.00321973	0.0047485	0.00165305	0	0	0.00881533	0	0.0822417	0.00611657	1.70684	0.00806781	0.00469863	0	0	0	0	0	0	0.799189	0.00178179	0.0412455	0.0173513	0.00601773	0	0	0	0.00449949	0.00636717	0.00178903	0	0	1.44012	0
TG(56:00)_[M+NH4]1+	936.895	0.225	0.525	1	0.00474272	0.0200107	0.00356995	0.0239209	0.00655454	0.00226314	0	0	0.0106542	0.0117127	0	0.00801849	0	0.00379856	0.00984852	0.0335571	0.0152172	0	0.00415094	0	0.00360415	0.0296782	0	0	0	0.00345292	0.020818	0	0.00477864	0	0.0114902	0.00279593	0.00247342	0.00966066	0.0126519	0.0264338	0.0231132	0.0124146	0.00417966	0.00333153	0	0.00330297	0.00431812	0	0.00546866
TG(56:01)_[M+NH4]1+	934.88	0.0375	0.05	2	0.0409517	0.130685	0.0520133	0.144303	0.0985633	0.0897035	0	0.0195639	0.0766723	0.116482	0.0598508	0.0978869	0.0688504	0.102975	0.112532	0.151577	0.129456	0.0569985	0.10453	0.141888	0.0780361	0	0.0908749	0.01377	0.0903919	0.112193	0.104916	0.128975	0.0866032	0.0805962	0	0.0657053	0.0902502	0.0913471	0.119328	0.121195	0.130844	0.135234	0.0651559	0.101592	0.0799772	0.0607253	0.0932243	0.00870888	0.117981
TG(56:02)_[M+NH4]1+	932.864	0	0	2	0.0800003	0.150977	0.0683979	0.152275	0.204326	0.359798	0.288744	0.083005	0.0913943	0.120979	0.119763	0.142519	0.120167	0.171948	0.198826	0.155956	0.127328	0.133176	0.223036	0.49626	0.110987	0.0934385	0.147402	0.0877458	0.214888	0.211677	0.133746	0.128908	0.145581	0.239047	0.194342	0.18085	0.381752	0.139513	0.107081	0.151871	0.139621	0.146776	0.129987	0.132812	0.146032	0.0819877	0.209598	0.266667	0.113904
TG(56:03)_[M+NH4]1+	930.848	0	0	2	0.0576046	0.0484414	0.0552663	0.0608796	0.13406	0.535441	0.999625	0.857379	0.0231212	0.0402508	0.0516797	0.0459766	0.0383119	0.124926	0.111724	0.0971175	0.0532331	0.0312729	0.111968	0.69713	0.0643582	0.706805	0.0772928	0.0669813	0.0965902	0.104378	0.0419123	0.0596405	0.071062	0.0840837	0.889457	0.0908686	0.500634	0.0718696	0.0609931	0.0654241	0.0673233	0.057299	0.0605508	0.0504692	0.0693134	0.0482875	0.10797	0.928491	0.043386
TG(56:04)_[M+NH4]1+	928.833	0.0125	0	2	0.0150752	0.030037	0	0.03017	0.0326664	0.417731	0.340226	0.28361	0.00200079	0.0136033	0.0149658	0.0254373	0.00893958	0.0211871	0.0312112	0.0314017	0.0509685	0.00815642	0.0226707	0.582383	0.0226218	0.278505	0.0190029	0.0193771	0.0478793	0.0241809	0.0217303	0.0338635	0.0223637	0.0332539	0.389882	0.0134248	0.402864	0.0230411	0.0156422	0.0189429	0.0353292	0.0304292	0.0314796	0.0269622	0.0238952	0.00481058	0.0226079	0.362304	0.0311048
TG(56:05)_[M+NH4]1+	926.817	0.0125	0	2	0.0292665	0.0775289	0.0349313	0.0695949	0.0553151	0.328962	0.0126902	0	0.00680619	0.0413274	0.0662771	0.0460723	0.0230557	0.0521242	0.0706614	0.0760189	0.0727522	0.0432105	0.0554405	0.39845	0.0707582	0.0145153	0.0625248	0.0108073	0.0670928	0.0825533	0.0547208	0.0648972	0.0255323	0.0517172	0.0376875	0.0516392	0.317629	0.0608362	0.0381602	0.068242	0.0959496	0.0691274	0.0586986	0.0548256	0.0496405	0.0505649	0.0806969	0.0165243	0.0537452
TG(56:06)_[M+NH4]1+	924.802	0.025	0	2	0.0961117	0.0616549	0.0822104	0.0705962	0.106776	0.191545	0.0334502	0.00853217	0.0139607	0.0735217	0.124003	0.0599907	0.0117698	0.0662192	0.0718983	0.0882506	0.0801698	0.0831896	0.0593386	0.20722	0.129906	0	0.137118	0.0338105	0.0899955	0.0782111	0.0585555	0.0712497	0.0416175	0.0715227	0.0348916	0.0832369	0.216428	0.166862	0.0606629	0.0733573	0.0646163	0.0676326	0.10299	0.168444	0.146859	0.0910343	0.110365	0	0.0638607
TG(56:07)_[M+NH4]1+	922.786	0.1	0.0375	2	0.00817796	0.00201632	0.0142637	0.00570895	0.00494729	0.123197	0.014353	0.00638624	0	0	0.0184582	0.00172934	0	0.00391328	0.0106326	0.00257904	0.0025205	0.00310203	0.00201818	0.102007	0.010627	0	0.00885768	0	0	0.00405377	0.00661443	0.00203506	0.00346388	0.00674017	0.0170019	0.005866	0.123571	0.0187895	0	0.00351603	0.00739439	0.00433944	0.0240114	0.0362049	0.0278488	0.0070081	0.00529188	0.012229	0.00239361
TG(57:01)_[M+NH4]1+	948.895	0.2625	0.4125	2	0.00310319	0.0149345	0	0.0105661	0.00550079	0.00527901	0	0	0.00253563	0.00663112	0	0.00794925	0	0	0.0057453	0.0151245	0.0160304	0	0.0031385	0.010598	0.00313557	0.0139622	0	0	0	0.00275074	0.0131875	0	0.0031531	0	0	0.00236262	0.00168232	0.00573671	0.00216403	0.0116992	0.0144776	0	0	0.00285546	0.00862447	0.0110876	0.00223587	0.011331	0.00225646
TG(58:02)_[M+NH4]1+	960.895	0.2375	0.1	2	0.00400295	0.0168483	0	0.0113407	0.00560198	0.245606	0	0.0140879	0	0.00507058	0.00326245	0.00244553	0	0.00558907	0.0131909	0.00811801	0	0	0.00614238	0.320634	0.00282808	0	0.00803867	0	0.0072959	0.00990384	0.00465084	0	0.00492588	0.0115504	0	0.00587107	0.235958	0.00296994	0.0055216	0.00560969	0.0113237	0	0	0.00749407	0	0	0.00623631	0.0343009	0.00368072
TG(58:03)_[M+NH4]1+	958.88	0.5	0.45	1	0	0	0	0	0.0030061	0.123512	0.19573	0.135192	0	0	0	0	0	0.00298443	0.00230609	0	0	0.00396369	0	0.169866	0	0.191537	0	0	0.00254126	0	0	0	0	0	0.189955	0	0.095588	0	0	0.00180411	0.00236405	0	0	0	0	0	0	0.188906	0
TG_oxid(36:00)	672.577	0.025	0.225	2	0.227836	0.412853	0.170017	0.354344	0.273973	0.310228	0	0.0228436	0.343789	0.436479	0.215568	0.519646	0.116861	0.315491	0.274577	0.321973	0.336351	0.187752	0.167398	0.265551	0.194058	0.0066146	0.181776	0.115733	0.241776	0.257313	0.387731	0.377265	0.104712	0.30967	0.00372089	0.265077	0.339844	0.142567	0.403125	0.406989	0.395938	0.375239	0.130154	0.194454	0.161057	0.203373	0.303553	0	0.477676
TG_oxid(36:01)	670.562	0.0375	0.2	2	0.163116	0.248028	0.201572	0.198527	0.231334	0.175949	0.0142171	0	0.202655	0.234443	0.183807	0.282392	0.0604048	0.22712	0.226742	0.176526	0.204368	0.151188	0.145952	0.140886	0.122538	0	0.137577	0.0948515	0.177958	0.213372	0.234481	0.213731	0.105175	0.2121	0.0474916	0.197649	0.222046	0.117445	0.238013	0.218117	0.192791	0.222372	0.120178	0.142753	0.182317	0.139566	0.237728	0	0.24678
TG_oxid(46:01)	810.718	0.025	0.1875	2	0.112894	0.150213	0.11076	0.141512	0.21601	0.0958441	0.011595	0.0189678	0.0982226	0.135267	0.147488	0.160932	0.129961	0.238751	0.253274	0.157882	0.146216	0.129879	0.176788	0.0751234	0.109414	0	0.161637	0.0894584	0.19059	0.240508	0.143578	0.148817	0.115491	0.297142	0.115898	0.210928	0.125889	0.146662	0.124153	0.162256	0.148683	0.140452	0.119329	0.13506	0.129513	0.150032	0.217379	0	0.173897
TG_oxid(48:00)	840.765	0.05	0.075	2	0	0.0225927	0.0143986	0.0231411	0.122849	0.00621398	0.0401996	0	0.00720636	0.0200171	0.00280563	0.0253645	0.000677611	0.0163795	0.0138413	0.0260306	0.0238737	0.00401388	0.00893096	0.0102489	0.00321584	0	0.00526497	0.000383968	0.0163349	0.00302511	0.0243744	0.0339715	0.00789004	0.0145781	0	0.00496552	0.00918217	0.00235485	0.0153883	0.0132778	0.0284554	0.0406722	0.011835	0.00461007	0.00454983	0.00106961	0.00755341	0.0115972	0.0343711
TG_oxid(48:01)	838.749	0	0	2	0.0945281	0.166036	0.102836	0.16365	0.254832	0.0788147	0.0914504	0.04486	0.136731	0.14936	0.105755	0.172962	0.113159	0.303325	0.292459	0.139869	0.145809	0.0797377	0.205111	0.111248	0.0977622	0.0429033	0.12933	0.0776259	0.234805	0.261575	0.159852	0.170945	0.181456	0.29403	0.0935789	0.298716	0.0977413	0.104165	0.148071	0.13334	0.152435	0.147243	0.0708862	0.109737	0.100461	0.104371	0.263749	0.0867743	0.18149
TG_oxid(48:02)	836.734	0.025	0.2375	2	0.0926715	0.111954	0.112485	0.0893899	0.16058	0.0626781	0.000159599	0.000645076	0.0630403	0.0910905	0.165836	0.121839	0.0930231	0.193236	0.199529	0.0838327	0.125754	0.0856347	0.166644	0.0560484	0.102232	0.0160726	0.113306	0.0900376	0.18949	0.181607	0.102234	0.110769	0.119673	0.19802	0	0.191748	0.0650625	0.122599	0.102214	0.088454	0.0974161	0.101976	0.0843376	0.120083	0.109138	0.0995388	0.213048	0	0.103312
TG_oxid(48:03)	834.718	0.1125	0.2375	2	0.0294901	0.0119265	0.00483584	0.00271618	0.0230199	0.00659327	0	0	0.00778999	0.0131258	0.0160707	0.0202526	0	0.0240839	0.0290712	0.318616	0.00521465	0.161554	0.00910525	0.00594607	0.00710218	0	0.00824697	0	0.0144319	0.0183764	0.0158384	0.0104167	0	0.0295509	0.013717	0.0142499	0.347993	0.0241411	0.00541752	0.00377844	0.0070909	0.012941	0.0177622	0.0196088	0.0143494	0.00760975	0.0161564	0	0.00781195
TG_oxid(50:00)	868.796	0.05	0	2	0.00041192	0.0086776	0.00457804	0.00447335	0.00734665	1.60903e-05	0	0.0105453	0.00574179	0.00677868	0.00286583	0.0045997	0.000684815	0.0175871	0.0190297	0.0103555	0.010788	0.000179457	0.00621004	0.00330053	6.44354e-05	0.0204936	0.00256876	0	0.00986571	0.00657435	0.00368665	0.00830115	1.62701e-05	0.0115164	0.0177085	0.00997671	0.00252178	0.00324052	0.00220529	0.00378062	0.0119739	0.0197072	0.000176491	0.000229408	0.00236296	0.0003012	0.0145845	0.0247628	0.0103067
TG_oxid(50:01)	866.781	0	0	2	0.128009	0.183318	0.111449	0.174939	0.288998	0.119006	0.00989884	0.0187824	0.145749	0.163541	0.125727	0.198524	0.174027	0.395657	0.349525	0.170517	0.196695	0.0813826	0.275876	0.110759	0.154099	0.0144651	0.146105	0.119095	0.282471	0.313144	0.198039	0.203624	0.256126	0.371886	0.157923	0.330977	0.146685	0.131779	0.180338	0.196185	0.188141	0.191146	0.115931	0.171154	0.16825	0.159853	0.331958	0.0289583	0.198536
TG_oxid(50:02)	864.765	0.025	0	2	0.150676	0.173114	0.20446	0.164993	0.265654	0.133426	0.0200703	0	0.123055	0.13517	0.197574	0.170091	0.150201	0.315122	0.342873	0.155045	0.164928	0.177438	0.234532	0.118894	0.170446	0.0452397	0.206046	0.129373	0.263151	0.31217	0.165045	0.161872	0.241229	0.348904	0.00742395	0.301047	0.135247	0.187191	0.140624	0.171261	0.137862	0.156035	0.193775	0.176806	0.20143	0.204682	0.314963	0	0.203132
TG_oxid(50:03)	862.749	0.0625	0.1375	2	0.00505026	0.0284808	0.0330489	0.0295178	0.0755876	0.0361489	0	0	0.00363799	0.0231109	0.0545351	0.0307624	0.0162499	0.0844743	0.0755205	0.0208072	0.0330104	0.0409668	0.0422927	0.0103566	0.0259567	0	0.0358432	0.020337	0.0590205	0.0697278	0.0172373	0.0253743	0.044534	0.0725676	0	0.0696582	0.0325042	0.0338552	0.0136896	0.0139486	0.00942501	0.0252198	0.0166939	0.0251532	0.0562481	0.0274533	0.0533648	0	0.0339037
TG_oxid(52:01)	894.812	0.05	0.2125	2	0.010134	0.061589	0.0283408	0.0560071	0.0710727	0.0374873	0	0	0.0313194	0.0805357	0.0292227	0.067412	0.0233503	0.0722467	0.124973	0.0770337	0.0627647	0.017628	0.0636727	0.052263	0.0511095	0	0.0365951	0	0.0791613	0.0843242	0.055326	0.0764225	0.0500197	0.0924234	0.0294954	0.0757188	0.0585698	0.0215221	0.0331774	0.0764314	0.0542255	0.0581235	0.0228427	0.0219036	0.0469519	0.0222941	0.0926593	0.00936515	0.0762959
TG_oxid(52:02)	892.796	0.0125	0	2	0.226113	0.139571	0.223653	0.136189	0.250186	0.135819	0.0236114	0.0283578	0.0863737	0.14381	0.246675	0.149785	0.145491	0.330483	0.29045	0.131243	0.146535	0.184241	0.266187	0.214431	0.219756	0	0.190561	0.10271	0.281282	0.256699	0.134653	0.135734	0.211725	0.305687	0.0108037	0.293361	0.141198	0.209447	0.148797	0.140856	0.114238	0.141827	0.215125	0.207152	0.203173	0.233071	0.299211	0.0145714	0.135642
TG_oxid(52:03)	890.781	0	0	2	0.114671	0.0579383	0.129183	0.0473652	0.115436	0.108079	0.385673	0.27802	0.0188333	0.0629219	0.184671	0.0626492	0.07861	0.169226	0.172576	0.0479348	0.050002	0.0929221	0.115699	0.0948444	0.147844	0.159601	0.134143	0.0145916	0.115539	0.120917	0.0603256	0.0547904	0.0723153	0.157727	0.366066	0.132264	0.0774587	0.113874	0.0774172	0.0588315	0.053814	0.0369463	0.131516	0.100442	0.127276	0.0983309	0.16119	0.3892	0.0662556
TG_oxid(52:04)	888.765	0.1375	0.1	2	0.0108171	0.0023125	0.00377043	0.00203858	0.00723855	0.0318907	0.0861882	0.0732985	0	0.00344257	0.00879046	0	0	0.00332743	0.0148382	0.00202934	0.00165348	0.00438951	0	0.0273483	0	0.0367192	0.0186213	0.0051379	0	0	0.0035612	0.00143026	0.00346221	0.0129153	0.038782	0.0119951	0.0406156	0.00688134	0.00273605	0.0022077	0.00586441	8.02784e-07	0.00341654	0.00542147	0.00628054	0.0118193	0	0.10953	0.00413072
TG_oxid(54:02)	920.828	0.0375	0	2	0.0176896	0.00265524	0.00942185	0.0123578	0.018509	0.00554183	0.0346514	0	0	0.00735496	0.00474466	0.00410512	0.00454033	0.0113927	0.0325312	0.0172086	0.0211799	0.0281577	0.0220325	0.0391136	0.0196514	0.0204435	0.0162073	0.0198934	0.0145623	0.0199935	0.0114419	0.0183984	0.0151008	0.0322497	0.0103671	0.0234846	0.00738779	0.00943612	0.00303164	0.00975432	0.00419763	0.0114071	0.024613	0.0305836	0.00935679	0.0203259	0.0282697	0	0.0100001
TG_oxid(54:03)	918.812	0	0	2	0.0388624	0.0134315	0.0283486	0.0137321	0.0455436	0.0722721	0.644098	0.633506	0.00374661	0.0139844	0.0608969	0.0231402	0.0148578	0.107284	0.0696105	0.0157302	0.0239424	0.082629	0.025772	0.200519	0.0579352	0.54374	0.074819	0.0188469	0.051433	0.054319	0.0150111	0.0131546	0.0189137	0.0704414	0.505756	0.0664135	0.150703	0.0701167	0.0117695	0.00597702	0.0054825	0.0170586	0.031039	0.048499	0.0557179	0.0475243	0.0751197	0.680839	0.012822
[truncated: 122 more columns]

## Sheet: -ve
DMS, CV test of XMI and DMT (-ve)				Total signal	1000	1000	1000	1000	1000	1000	1000	1000	1000	1000	1000	1000	1000	1000	1000	1000	1000	1000	1000	1000	1000	1000	1000	1000	1000	1000	1000	1000	1000	1000	1000	1000	1000	1000	1000	1000	1000	1000	1000	1000	1000	1000	1000	1000	1000
				0s per sample	66	35	57	52	63	45	61	70	49	43	49	62	62	60	48	62	65	63	62	54	46	59	47	61	49	58	55	55	64	52	44	50	42	61	45	58	53	59	55	58	45	60	67	50	66
				Solvent	DMT	DMT	DMT	DMT	DMT	DMT	DMT	DMT	DMT	DMT	DMT	DMT	DMT	DMT	DMT	DMT	DMT	DMT	DMT	DMT	DMT	DMT	DMT	DMT	DMT	DMT	DMT	DMT	DMT	DMT	DMT	DMT	DMT	DMT	DMT	DMT	DMT	DMT	DMT	DMT	DMT	DMT	DMT	DMT	DMT
		0s		Sample type	Almond	Almond	Almond	Almond	Almond	Almond	Almond	Almond	Almond	Almond	Almond	Almond	Almond	Almond	Almond	Almond	Jersey	Jersey	Jersey	Jersey	Jersey	Jersey	Jersey	Jersey	Jersey	Jersey	Jersey	Jersey	Jersey	Jersey	Jersey	Jersey	Jersey	Jersey	Jersey	pWhole	pWhole	pWhole	pWhole	pWhole	pWhole	pWhole	pWhole	pWhole	pWhole
Lipid variable	m/z			0s	Furse_Ex052_DMT_A09_003_Almond.mzXML	Furse_Ex052_DMT_A10_006_Almond.mzXML	Furse_Ex052_DMT_B04_013_Almond.mzXML	Furse_Ex052_DMT_B07_015_Almond.mzXML	Furse_Ex052_DMT_B10_004_Almond.mzXML	Furse_Ex052_DMT_C01_011_Almond.mzXML	Furse_Ex052_DMT_C05_019_Almond.mzXML	Furse_Ex052_DMT_E06_020_Almond.mzXML	Furse_Ex052_DMT_E07_008_Almond.mzXML	Furse_Ex052_DMT_E08_010_Almond.mzXML	Furse_Ex052_DMT_F01_005_Almond.mzXML	Furse_Ex052_DMT_F04_012_Almond.mzXML	Furse_Ex052_DMT_F06_018_Almond.mzXML	Furse_Ex052_DMT_F09_014_Almond.mzXML	Furse_Ex052_DMT_H01_016_Almond.mzXML	Furse_Ex052_DMT_H10_007_Almond.mzXML	Furse_Ex052_DMT_A02_016_Jersey.mzXML	Furse_Ex052_DMT_A05_013_Jersey.mzXML	Furse_Ex052_DMT_A06_012_Jersey.mzXML	Furse_Ex052_DMT_A12_005_Jersey.mzXML	Furse_Ex052_DMT_B02_018_Jersey.mzXML	Furse_Ex052_DMT_B11_007_Jersey.mzXML	Furse_Ex052_DMT_C10_001_Jersey.mzXML	Furse_Ex052_DMT_C11_014_Jersey.mzXML	Furse_Ex052_DMT_D01_006_Jersey.mzXML	Furse_Ex052_DMT_D04_019_Jersey.mzXML	Furse_Ex052_DMT_D05_002_Jersey.mzXML	Furse_Ex052_DMT_D07_004_Jersey.mzXML	Furse_Ex052_DMT_D08_003_Jersey.mzXML	Furse_Ex052_DMT_E01_015_Jersey.mzXML	Furse_Ex052_DMT_E10_009_Jersey.mzXML	Furse_Ex052_DMT_G02_010_Jersey.mzXML	Furse_Ex052_DMT_G03_017_Jersey.mzXML	Furse_Ex052_DMT_H09_020_Jersey.mzXML	Furse_Ex052_DMT_H12_011_Jersey.mzXML	Furse_Ex052_DMT_A04_005_CapWhole.mzXML	Furse_Ex052_DMT_A07_012_CapWhole.mzXML	Furse_Ex052_DMT_A08_009_CapWhole.mzXML	Furse_Ex052_DMT_C02_017_CapWhole.mzXML	Furse_Ex052_DMT_C04_013_CapWhole.mzXML	Furse_Ex052_DMT_C09_015_CapWhole.mzXML	Furse_Ex052_DMT_D02_004_CapWhole.mzXML	Furse_Ex052_DMT_D06_011_CapWhole.mzXML	Furse_Ex052_DMT_E02_007_CapWhole.mzXML	Furse_Ex052_DMT_E09_002_CapWhole.mzXML
Cer_37:2_[M+Cl]1-	612.513	0.575	0.2625	1	7.07551	0	0.0384267	0	0.0065103	0	0	0.0264157	0	0	0	14.4547	0	2.28417	0	0	0	0.0605797	0	0	0	0	0	0	11.8754	28.168	0	0.0157392	0.383547	0.0157427	0	0	0	1.89181	0	0	0.322509	0.0321304	4.114	3.75504	0	0.372742	8.12529	0	0.200334
Cer_42:2_[M+Cl]1-	682.591	0.725	0.75	0	0	0	0	0	0	0	0	0	1.40779	0	0	0	0	0	0	0	0.25666	0.729206	0	0	0	0	0	0	0	0.397975	0	0	0	0	0.0071456	0	0.196498	0.638014	0	0	0.00910947	0	0.349304	0.0172829	0	0	0	0	0
Cer_44:1_[M-H]1-	676.661	0.65	0.75	0	0.41023	0	0	0	0	0	0	0.701302	1.43548	0	0	0	0	0	0	0	0	0.540038	0	0	0	0	53.7247	0	0	0.799409	0	0	0	0	147.857	0	0	0	6.21917	0	0.980796	0.303984	0	0	0	0.832173	0	0	0.4338
LPC_18:4_[M+Cl]1-	550.271	0.7125	0.525	0	0	0	0	0	0	0	0	0	0	0	1.30904	0	0	0	0.937364	0	0	0	0	1.00334	1.66439	0.37845	0	0	1.50091	0	0	0	0.488803	0	0	5.26611	0	0	0	0	0	0	0	0	0	0.543488	0	0	0
LPC_19:3_[M+Cl]1-	566.302	0.4	0.3625	2	0	1.8112	0	0	0	3.8782	0.832698	0	2.29811	2.89431	0	1.68611	0	1.13678	3.13467	0	0	0	0	1.10873	0	0	0	0.765175	0	0.686602	0	1.47155	0	3.75006	1.06221	2.87601	0	0	0	0.5511	0	0	0.341353	0.98933	0	0	0.735163	10.2142	0.473293
LPC_22:2_[M+OAC]1-	634.409	0.4375	0.1125	2	1.69346	0	0	0.609726	0	0	0	0	0	0	0.798067	0	1.13349	0	0	0	0	0.529793	0.513224	0.925832	2.1863	0	2.47078	1.84295	1.29071	0	0	0	0.431695	0	0	0	0	0	3.61658	1.33668	3.72344	0.729185	0	0	0	1.29208	0.722755	4.18237	0.525746
LPC-2O_20:0_[M+OAC]1-	596.43	0.3	0.5875	1	0	0	0.742561	0.638	0	7.19506	0.628958	0	0	0	3.06098	1.88828	0.297684	0	6.04843	3.2379	0.550896	0	0.964654	3.70082	0	0	2.32932	0.38972	4.10912	1.34068	4.37664	1.08543	0	4.86305	0	5.33216	6.45489	0.776486	5.71891	0.614093	0	0	0.532909	0.791134	0	1.93155	0.72723	3.23565	1.25925
LPI_18:1_[M-H]1-	597.304	0.275	0.0125	2	0.310356	0	0	0	0	5.78473	0.679075	0	1.23989	1.91332	2.35682	0.781353	0.199082	0	0.454784	0.718162	0.785406	0.283349	0.276775	0.861391	0	0.546554	1.21206	0.0128052	4.71207	1.76222	0.950771	0	0	3.07499	0	5.25684	0	0.811159	0	0	0	0	0	1.37295	6.893	0.233024	0.53163	10.5124	0.265725
PC_08:0_[M+OAC]1-	456.2	0.0125	0.25	2	1.52135	1.74254	9.74788	7.02273	27.6137	11.3167	10.0448	8.11158	27.5152	61.0536	9.26595	10.6178	14.4881	7.21484	12.8985	0.732252	5.67907	10.0066	9.42965	12.0897	1.46399	5.97103	2.5112	5.94799	6.26702	18.4101	23.5327	19.7104	17.3706	6.64974	3.62824	5.5481	6.03156	0	5.31215	6.95183	9.06285	11.3596	1.81573	12.1758	12.2953	2.86676	9.48714	15.6671	6.62825
PC_19:1_[M+Cl]1-	584.312	0.65	0.6625	0	0	0	0	0	0	0	0	0	0	0	0.78391	0	0.474267	0	0.914184	0.683302	0	0	0	0	0	0	0	0	0.838073	0	0	0.800685	0.494186	1.84621	0	0	0	0	0	0	1.02051	0	0	0.691099	1.93041	0	0	3.29576	0
PC_21:1_[M+Cl]1-	612.344	0.625	0.825	0	0	2.22274	0	0	0.561631	1.61179	0	1.12517	0	0	1.6878	0	0	0	0.633877	0	0	0	0.401812	0	0	0	1.99678	0.395989	0	0	0	0	0.532904	1.6216	0.505417	1.54892	0	3.8754	1.71166	0	0	0	0.536847	0	0	0	0	1.69668	0
PC_21:1_[M+OAC]1-	636.388	0.475	0.6125	1	0	0	0.646979	0	0	7.75843	0	0	0	1.94548	0.852982	0.530527	0.354313	0.794943	0.385746	0.804068	0.614546	0	0.5064	0	0	0	4.15818	0.285067	1.24853	0	0	0	2.04495	3.52979	0	1.46757	0	0	1.50408	0.495308	0	0	0.62393	0.506473	2.07363	1.1584	1.45109	5.97148	0
PC_22:0_[M+OAC]1-	652.419	0.5625	0.7375	0	0	0	0	0	0	1.72905	0	0.44489	0	1.85978	0	1.18552	0	0	0	0.612668	0.571761	0	0	0	0	0	0	0	1.31774	0.595111	0	0	0	1.11049	1.08925	1.66129	0	0	6.15118	0	0	0	0.614782	0	3.64213	0	1.06471	1.79754	0
PC_24:0_[M+OAC]1-	680.451	0.65	0.75	0	0	0	0.929456	0	0.420731	2.10274	0	0	0	0	0	0	0	0	0	0	0.768334	0.633717	0	0	0	0.481981	0	0	0	0	0	0	0	0	0	3.10762	0	0	3.79084	0.525569	0	0	0	0	0	0.585689	0	0	0.431993
PC_28:1_[M+Cl]1-	710.453	0.5375	0.825	0	0.51789	0.605556	0.331063	0	0	12.0843	0	0	0	0	24.4233	0	0.489488	0	24.9021	0	0.632662	0	0.209341	0	0	0.357535	0	0	0	0	0	0	0	17.8347	0	5.85813	2.79946	0	9.39637	0	0.762352	0.405046	0	0	1.72468	0	0.469751	9.58732	0.525295
PC_30:4_[M+Cl]1-	732.438	0.725	0.875	0	0.464139	0	0	0	0	2.45977	0	0	1.50272	0	4.26827	0	0	0.365409	0.834832	0	0	0	0	0	0	0	0	0	1.46642	0	0.646636	0	0	3.01893	0	6.37774	0	0	0	0	0	0	0	0	0	0	0	0	0
PC_31:4_[M+OAC]1-	770.498	0.525	0.5875	0	0	3.48029	0	0	0.0150673	1.58525	0	1.30521	1.73502	0	0	0.509647	0	0	0	0.525657	0	0	0	0	1.63315	0	2.69399	0.774579	0	0	0	0	0.512718	0	0	0	3.39184	3.04543	0	0	0	0	0.464874	0.866952	1.98811	0	0.202284	0	0
PC_32:5_[M+OAC]1-	782.498	0.125	0.0625	2	3.77627	0	3.72933	3.2469	1.17789	1.94326	4.69834	8.67763	5.30825	1.93252	0	3.81553	2.96443	1.85232	0.72697	2.73613	0.582143	2.12621	3.17527	4.42979	7.41802	2.02429	0	1.32813	0	3.75325	8.27976	1.65245	1.27938	0.761185	0	0	0	8.51079	0	0.896051	1.47905	0.557545	1.5543	1.8703	2.06491	1.1443	3.38439	0	1.30304
PC_36:8_[M+Cl]1-	808.469	0.625	0.9	0	0.986185	0	0	0	0.467537	42.9747	0	0	0	0	63.9827	0	0	0	47.4919	0	1.42363	0	0.416143	0	0	0	0	0	32.4896	0	0	0	0.543662	71.7326	0	47.9449	0	0	35.7515	0.635029	0	0	0	0	0	0.647453	0	19.0027	0
PC_38:0_[M+OAC]1-	876.67	0.0375	0	2	8.729	12.6388	17.1069	6.55607	7.89548	4.56183	14.2689	4.98293	22.6741	34.9883	1.75503	8.61523	23.6156	15.4315	0.862566	6.43427	6.6361	7.45701	13.731	7.4449	3.25329	8.34263	6.01485	3.81057	4.86328	13.1829	21.4068	2.68272	4.35656	3.73836	0.977141	5.62553	0	0	2.71467	10.9314	2.49634	12.033	1.55783	6.94535	16.0444	7.96755	10.7287	3.28747	1.97538
PC_38:9_[M+Cl]1-	834.485	0.575	0.8625	0	0	0.105651	0	0.617356	0	30.8853	1.26161	0	0	0	64.8942	0	0	0	36.5538	0.765379	0	0	0	0	0	0	1.11519	0	17.2304	0.947902	0	0.480422	0	68.3371	0	56.7793	0	0	27.043	0.488331	0	0	0.744244	0	0	0	0	9.41203	0
PC_39:3_[M+Cl]1-	860.594	0.0875	0.1875	2	9.09359	1.65748	2.20272	9.14891	0.534926	3.49824	7.38973	20.0584	1.09259	2.12258	0.574986	2.14298	10.3773	0.300349	0.777457	0.757558	0.297963	1.28039	14.2485	4.54627	26.4496	3.82902	2.17564	6.14995	3.82246	2.91337	4.54939	3.7257	1.30082	0	3.16717	0	2.2571	10.5363	1.79272	12.6098	4.40566	0.298411	0.656995	0.825929	1.26111	6.68897	6.12724	1.64265	5.37667
PC_41:4_[M+OAC]1-	910.654	0.65	0.6	0	0.569509	0	0	0	0	0	0.79271	2.4978	1.64345	1.33215	0	0	0	0	0	0	0	0	0	0.815498	0	0.397231	0	0	0	0	0.799773	0	0.294631	0	0	0	0	0.706911	1.67075	0	0	0	0	0	0	0	0	0	0
PC_42:0_[M+Cl]1-	908.688	0.225	0.0125	2	1.33892	1.86567	0.94985	1.18636	0	0	1.4142	3.69113	2.28118	3.92576	0	0.29981	1.73331	0	0	2.63432	1.0113	0.634924	1.56462	0	1.55127	0.260789	2.2184	0.517318	0	2.25832	1.79008	0	1.07469	0	1.317	0	0	1.05799	1.32266	1.91479	0	0.22635	0.622776	0.268384	1.29763	0.346683	1.01259	1.41499	0.285217
PC_42:1_[M+Cl]1-	906.672	0.3875	0.125	2	2.33157	1.88637	0.447007	0.681861	0.51285	0	0.421276	2.28064	2.96489	1.90349	0	0.530904	1.8393	1.89896	0	0.486829	0	0.59861	0	1.69116	0	0.83865	5.50688	0	0	0	1.65484	0	0	0	0	2.3821	0	1.48361	0	1.32505	0	0.595312	0	0	2.97413	0	0.594506	1.23219	0
PC_42:7_[M+OAC]1-	918.623	0.225	0.375	2	1.0942	8.1936	0	0.562811	0.391284	40.9927	0.665012	0.459756	0	0	89.6464	0	0.403792	0.571777	122.465	0	2.68779	1.31814	2.38665	3.97903	1.47345	1.05242	6.31303	0	14.1328	1.35722	0	0	0.532763	86.7024	0	44.0827	13.7448	3.1167	50.1205	0.356775	2.12262	0	0.55918	0	1.94324	0.561146	0.535523	58.2137	0
PC_42:9_[M+OAC]1-	914.592	0.4	0.775	1	1.22744	4.79313	0.787851	0	0	46.26	0.650279	1.08192	1.60746	0	76.4122	0	0	0	153.684	0	0	1.33105	1.95451	0	1.38926	0	3.72152	0	15.5111	0	1.50001	0	0	84.3682	0	64.7675	18.2357	2.91136	57.0244	0.746609	0	1.7093	0	0.646585	3.97153	0	0	51.73	0
PC_43:0_[M+OAC]1-	946.748	0.1125	0.0125	2	0.70504	15.5079	1.87101	0.639895	0.00661819	1.23748	1.54767	7.26816	1.31255	0.965982	0.524347	0.948716	0.363588	0.66352	0	0.886583	0.736616	1.30273	0.384803	0.514251	9.67545	0.711969	1.01116	0.741992	0	0.903793	0.343249	0.514209	1.48695	0	1.75516	1.79449	2.63801	15.4497	0	0.411784	0	1.04677	0.882845	1.10635	4.44596	1.3773	0.408881	0.935002	1.41927
PC_43:1_[M+OAC]1-	944.732	0.1125	0	2	4.09657	3.20542	1.26119	1.65824	1.11596	0	1.74887	6.94088	1.12641	1.88661	0	0.591363	2.69179	1.32744	0	0.432358	0.477019	0.518029	2.41998	3.7103	1.27054	1.62983	0	1.07695	2.61961	1.36579	1.43522	0.654552	1.30667	0.450115	1.04803	0.846964	2.72716	8.93981	0	2.79194	0.0696467	0.499925	0.0453877	0.0602253	0	1.98386	2.84222	0	1.72409
PC_44:1_[M+Cl]1-	934.704	0.2875	0.0125	2	1.78202	8.50793	0.00468632	0	0.584876	2.86786	0.756225	14.9403	9.47043	4.36144	0	0.491348	0.714633	0	0	0	0.451662	0.529105	0.667541	1.6708	2.78313	0.417773	8.67063	0	0	0	1.49641	0.544356	0	0	0	2.65554	0	6.5369	2.77144	2.333	1.0516	0	0.653741	0	9.77239	0	0.737762	3.36172	0.0125887
PC_44:10_[M+OAC]1-	940.607	0.5625	0.675	0	0.364964	3.48395	0	0	0	0	0	0.432209	1.67159	2.91617	0	0	0	0	0.0451517	0	0	0	0	0	1.14362	0	6.53888	0	0	0	0	0	0	0.433114	0	2.81931	1.96983	2.07065	0	0	0	0	0	0	5.21736	0	0	1.82437	0
PC_44:12_[M+OAC]1-	936.576	0.55	0.8625	0	0.469187	0	0.714553	0	0	12.3034	0	0.565348	0	0	96.3737	0	0	0.462252	134.603	1.44937	0	0.73625	0.454301	0	0	0	2.6715	0	4.83646	0	0	0	0	90.5648	0	25.232	9.14943	0.795415	29.7208	0	0	0	0	0	0	0.589857	0	29.3671	0
PC_44:4_[M+Cl]1-	928.657	0.7875	0.65	0	0	0	0	0	0	0	0	0.993448	0	0	0	0	0	0	0	0	0	0	0	0	0	0	0	0.00704739	0	0	0	0	0.455891	0	0	0	0	0	0	0	0	0	0	0	0	0.640573	0	0	0
PC_44:8_[M+OAC]1-	944.639	0.675	0.425	1	0.0181614	1.41222	0	0	0.326528	1.96755	0	0	0.817307	0	0	0	0.721798	0.56423	0	0	0	0	0	0	0	0.00473471	0	0	0	0	0.679171	0	0	0.655184	1.14099	0	0	0	0	0	0	0	0	0	0.0628332	0	0	0	0
PC_46:0_[M+OAC]1-	988.795	0.5375	0.4125	1	1.46262	0	0	0	0	0	1.57289	4.91199	0	0	0	0	0.48499	0	0	0	1.4988	0	1.02499	0	0	0.509353	0	0.553876	0	0	2.58942	0	0.695906	1.01734	0	0	4.62404	0	0	0	0	0.466382	0	0.74251	0	0	0.338504	0	0.524176
PC_46:1_[M+Cl]1-	962.735	0.8125	0.7125	0	0	0	0	0	0	0	0	0	0	0	0	0	0	0	0	0	0	0	0	0	0	0	0	0	0	0	0	0	0	0	0	1.15466	0	1.29831	0	0.527241	0.900888	0	0	0	0	0	0	0	0
PC-2O_28:0_[M+OAC]1-	708.555	0.5125	0.4375	1	0	0	1.48178	0	0.554496	0	0.630047	3.14311	0	0	1.87156	0.44746	0.435367	0	0	0	1.21126	2.16255	0	1.8612	0	0	0	0.965385	0	1.48301	1.30653	4.78873	1.80649	4.48121	0	0	0	0	0	0.442913	0	0	0	2.48423	0	0	1.18693	0	0.504072
PC-2O_34:1_[M+OAC]1-	790.633	0.05	0	2	1.46443	159.836	4.53823	2.62057	3.74354	65.2133	4.00253	12.3813	130.998	92.9066	0	1.35116	9.74786	1.67436	0	6.744	0.719219	7.07858	6.21588	5.04184	7.45105	3.40249	19.2799	3.98263	0	4.71503	2.41073	8.5257	6.64832	1.82094	5.20652	123.077	3.16194	9.98112	86.7644	6.68305	4.49936	2.65542	1.78822	2.42668	43.3308	5.80028	5.73501	116.69	7.61179
PE_41:0_[M-H]1-	816.649	0.3875	0.3	2	0.000445252	0	0.811642	0.61552	2.55695	1.75795	0.442306	1.72139	1.59747	0	0	1.19503	1.03784	1.42822	0.370916	0.797381	0.52059	1.43176	0.47889	0.874483	0	0.324431	0	0.622006	0	0	0	3.50402	1.33018	0	0	0	0	0	0	0.627027	1.12682	0.717276	0.6903	0.966214	0	0.00397589	1.82304	0	0.798907
PC-O_21:0_[M+Cl]1-	600.38	0.525	0.85	0	0.468345	0	0	0	0	7.91301	0.653341	0	0	0	5.25701	0.455237	0.339674	0	37.8635	0	0.66782	0	0.446488	0	0	0	0	0	2.8639	0	0.644384	0.00475963	0.676721	11.1524	0	25.7607	8.22905	0	32.927	0	0	0	0	0	1.84651	0	0.438792	20.2198	0
PC-O_36:0_[M+Cl]1-	810.615	0.4125	0.425	2	0.0153875	1.65517	0.00129863	0.680787	1.12214	0	0	0	0	0	0	1.06768	0	0.970363	0	0.0649903	0.733583	0	0	0	0	2.47808	0	1.62228	0	0.696337	0.714482	0.748745	0.00591487	0	0	0	0	1.51826	0	0.0137455	0	0.0974942	2.28789	0.659163	0	1.17518	0.72239	0	1.86213
PC-O_36:1_[M+OAC]1-	832.644	0.1	0.0625	2	28.2269	0	6.27699	23.8871	7.9292	1.47309	10.4287	22.1423	0.0517549	0.0288694	3.64761	6.22492	9.70847	6.92343	3.1762	13.7663	4.87294	10.6935	9.92227	11.8957	40.9374	32.3719	2.70492	24.9306	17.0119	12.5384	9.17413	6.36946	7.88928	4.41337	17.7991	0	11.3457	29.2503	0	9.90271	13.6879	8.95057	3.17571	4.37046	1.1396	15.352	16.3168	0	14.1484
PC-O_36:2_[M+OAC]1-	830.628	0.3875	0.075	2	0	1.41908	0	0	0	3.86448	0	13.8277	2.92366	3.35785	0	0	0	0	0	0.018774	0	0.768661	0.5629	0.0688388	2.86829	1.45005	4.03326	0.33867	0	0.814313	0	0	0.568482	0	0	0.0123849	0	8.13648	0.0143291	0.526033	0	0.627623	0	0	4.52543	0	0.367212	0	24.5501
PC-O_36:3_[M+OAC]1-	828.612	0.6125	0.6125	0	0	0	0	0	0	0	0	0.507228	0.0324538	0	0	0	0	0.539319	0	0	0	0	0.516587	0	0.00477406	0	0.086961	0	0	0	0	0	0	0	0	0.0506524	0	0.00896929	0	0	0	0.659429	0	0	0.0633596	0	0	0	0.231496
PC-O_39:1_[M+OAC]1-	874.691	0.1125	0.0375	2	1.35156	4.86915	2.99481	0.914422	4.0735	0	0	19.3379	1.70726	0	0	3.38552	2.40472	1.43003	0	0.743078	1.77104	7.06329	2.94964	1.44077	5.69617	0.99008	1.45091	1.29164	0.903501	0.46799	0.54815	3.52962	3.39092	0.0619711	1.11166	0.951778	2.69284	12.1058	0	2.88241	3.26306	2.80536	1.25476	8.58655	8.03903	1.22545	1.23682	0	1.35765
PC-O_40:4_[M+OAC]1-	882.659	0.7	0.3375	1	0	0	0	0.385354	0	0	0	0	0	0	0	0	0	0.421705	0	0.09845	0	0	0	0	0.010673	0	1.94076	0	0	0.0198669	0	0	0	0	0	0.556846	0	0	0	0	0	0	0	0	2.66139	0	0	0	0
PC-O_41:0_[M+Cl]1-	880.693	0.35	0.25	2	0	0	1.67074	1.07532	0	0	2.38883	1.10938	0	1.32504	0	1.81638	0.795693	0.835934	0	1.34761	0.83013	0	0	0.920177	0	0.278046	5.26587	0.0448685	0	1.40162	0.746879	0	0	0	0.90217	0	0	0.0409433	0	0.42402	4.10116	1.76234	2.6123	0.821849	3.65163	0.655374	0.758913	1.89158	0.481026
PC-O_42:2_[M+Cl]1-	890.678	0.05	0	2	8.99076	42.3953	6.02682	5.49981	4.03938	8.81441	16.4077	4.11014	35.1932	37.4214	0	3.52818	11.5839	6.44918	0	3.60966	3.02467	3.99654	14.0629	8.23763	7.2621	2.19346	18.1792	6.9191	0	10.4241	23.1692	1.4892	4.77771	0.871893	0.899855	11.0171	3.70343	14.4068	10.2845	10.0757	3.60267	3.5959	1.49352	5.29912	50.368	2.75368	4.95008	25.239	2.61425
PC-O_42:3_[M+Cl]1-	888.662	0.425	0.3625	2	0.566367	0	0	2.33797	0.000334928	0	0.582561	0.953586	2.73502	0	0	0.49992	1.37132	0.355792	0	0.739174	0.769183	0.414417	1.52578	0	0	0.584318	2.90604	1.47751	0	0	0.518499	0	0	0	0	1.62605	0	0.788266	1.65063	2.52008	0	0	0	0	0	0.972023	0.943747	0	0.824548
PC-O_42:6_[M+OAC]1-	906.659	0.375	0.125	2	3.19891	1.7284	1.78657	0.858952	0	0	0.84427	2.01188	4.36593	3.28108	0.791637	0.414881	2.45408	3.01744	0	1.57515	0.576636	0.636511	0	3.04283	0	1.00328	5.50688	0	0	0	2.05851	0	0	0	0	2.80428	0	1.48361	0	1.63982	0	0.563852	0	0	6.22723	0	0.662935	1.93842	0
PC-P_34:4_[M+Cl]1-	772.505	0.1625	0.175	2	11.2322	0	2.65684	11.7898	1.19403	0	4.80335	10.5409	4.78328	1.44165	0.947189	1.04704	9.77209	0	0.759456	5.33052	1.28717	2.19162	15.1784	2.7556	4.33399	15.6213	0	10.6554	1.36707	1.28685	1.67736	2.61846	5.91937	0.729302	1.14498	0	0	10.6709	0	13.3892	1.54437	0.549069	1.57755	2.11752	0	10.7648	10.9955	1.09984	8.19558
PC-P_37:2_[M+OAC]1-	842.628	0.6625	0.7	0	0	0	0	0.593766	0	0	0	1.1221	0	0	0.863097	0	0	0	0	0	0	0.44233	1.01547	0	0	0.407522	2.21205	0.744633	0	0	0	0.39071	0	0	0	0	0	0	0	0.335252	0	0	0	0	0	0	1.13011	0	0
PC-P_41:0_[M+Cl]1-	878.678	0.35	0.1375	2	0.557059	0	0	2.6835	0.606365	0	0.723021	0	4.0373	3.4133	0	0	0.910135	0	0	1.5042	0.701265	0.693011	0.729787	2.80692	0	0.607744	0	0.393774	0	0.787587	2.27439	0	0	0	0	0	0	0	0	0.803173	0	0	0	0.504042	2.41147	0.697606	1.31658	0	1.04367
PE_28:0_[M-H]1-	634.445	0.1	0.0625	2	0	3.24186	0	0	0.851094	9.68187	4.12849	1.53909	4.0487	0.764116	2.17707	0.814078	0.294994	1.95994	4.04636	0.535785	0	2.1033	0	2.93219	2.63173	0.340289	2.27746	0	2.7608	2.46825	0.590449	2.01749	0.516734	2.26566	2.56779	3.78564	2.90296	2.64512	11.004	0.53412	2.03736	0.679934	0.521635	1.55494	0	1.76205	0.519894	5.612	0.820333
PE_30:0_[M-H]1-	662.477	0.2125	0.225	2	1.1149	0	12.0733	0.831644	17.876	0	32.7341	17.0573	3.39172	0	4.08205	9.86813	1.0995	18.6139	36.1322	19.4611	17.5977	24.5173	1.03174	25.6855	11.1813	0	0	1.24504	7.74098	24.7013	26.181	20.8358	17.0259	5.72307	26.2613	1.27354	14.6624	16.0715	0	0.542649	10.1173	19.8619	15.2205	15.9855	0	0.578958	1.26965	0	0.461262
PE_30:1_[M-H]1-	660.461	0.6375	0.475	1	0	0	0	0	1.60876	0	0	0.637824	0	0	0	0.469614	0	0.589032	0	0	0.683525	0.748266	0	0	0	0	0	0.308453	1.33726	0	0	0.861643	1.09704	0	0	0.723539	0	0	0	0	0	0	0	0	0	0	0	1.85982	0
PE_31:0_[M-H]1-	676.492	0.525	0.5	0	0.389115	0	0	0	0.647673	0	0.824244	0.93145	0	0	0	0	0	1.00948	0	0.717882	0.622604	1.4426	0.470171	2.09394	0	0.00658754	4.60462	0.373118	1.51419	0	0.63928	0	0	0	0	0	2.4688	1.18756	1.72471	0	1.04717	0.551007	0	0	1.73494	0	0.321562	0	0
PE_31:4_[M-H]1-	668.43	0.65	0.7875	0	0	0	0	0	0.512727	1.7793	0	0	0	0	0.963152	0	0	0	0.799861	0	0.739781	0.528588	0	0	0	0	0	0	0	0	2.01661	0	0.610355	0	0	0	0	0	0	0	1.21015	0	0	0	0	0	0	1.753	0.505562
PE_32:1_[M-H]1-	688.492	0.175	0.2125	2	9.49705	0	51.6048	8.40331	44.4513	0	66.5009	62.5155	0	0	17.4975	43.3318	12.8156	40.3235	16.8225	56.5239	49.6978	53.1922	19.8866	68.6937	58.8527	8.79401	0	12.8478	58.5031	68.1052	66.8669	55.0365	53.299	24.8386	55.3338	0	36.2666	44.4941	0	12.39	55.0156	51.428	42.7861	45.3284	0	6.79397	13.381	1.36155	4.88619
PE_35:0_[M-H]1-	732.555	0.425	0.275	2	2.15952	0	2.657	2.05704	0.473096	0	1.92051	4.56256	0	0	0	0.713988	0	0.981767	0	0	0.70659	0	1.86596	0	3.38838	2.7517	0	2.44847	0	0	2.0361	2.3593	0	0	0	0	0	2.22743	0	1.15581	1.87339	0.646757	0	0.762458	0	0.677651	1.73616	0	0.816053
PE_35:1_[M-H]1-	730.539	0.0875	0.1375	2	30.1608	0	19.9546	31.7725	22.0787	0	31.9917	47.0126	1.93367	5.2047	2.09573	21.0403	25.9912	18.2842	5.82944	23.1198	21.1129	27.2719	37.4358	29.8108	30.1259	28.5374	7.34721	28.5066	21.6765	25.5581	29.9372	25.0918	24.1175	12.6341	29.4808	1.91069	18.5286	32.7872	0	27.3129	33.0495	25.2869	18.8601	19.5653	0	22.7446	28.399	2.08024	23.315
PE_35:2_[M-H]1-	728.524	0.125	0.2	2	24.8404	1.51971	14.3127	22.0261	14.8873	1.62328	19.7562	29.5987	0	0	1.73768	22.1535	21.7327	19.9829	0.793408	15.5046	21.8218	20.4492	24.0483	15.8172	21.8644	23.3919	1.72351	22.5391	16.0181	27.2148	17.3138	26.8173	24.4764	5.85149	21.462	1.63961	14.9382	25.293	0	22.9684	17.9477	21.8196	11.0302	19.2409	0	17.5901	26.6405	0	23.9132
PE_36:3_[M-H]1-	740.524	0	0	2	578.935	423.48	525.554	590.514	469.957	450.987	516.829	494.525	406.806	420.76	345.499	471.038	516.828	471.404	227.67	484.699	535.218	560.84	604.283	572.497	640.436	513.196	566.997	521.753	603.074	505.796	506.293	528.575	505.494	329.812	558.542	347.368	732.682	523.431	378.92	614.057	670.401	536.837	469.547	467.742	525.23	571.278	536.916	372.877	556.318
PE_39:0_[M-H]1-	788.617	0.1625	0.0125	2	0.579698	38.2762	1.87669	1.50611	1.02858	6.29797	0.714755	0.232611	19.5321	14.2469	0	2.46539	2.07619	1.04168	0	0.00842622	1.80365	1.32343	0.418129	0	0	0.252801	5.17666	1.86722	0	0.760183	0	1.12891	0.60049	0	0	14.1591	0	0	5.77269	1.06206	0	0.882561	1.00238	0.890971	5.83167	0.0337184	1.32337	1.7002	1.0254
PE_39:1_[M-H]1-	786.602	0.125	0.0125	2	0.606638	3.03087	2.06293	0.560363	2.22244	0	0	1.51504	1.81895	4.20018	0	2.39156	0.430418	0.445007	0.866695	0.467815	0.0969667	1.82894	0.482673	1.10283	1.3138	0.694995	0	1.3117	1.44186	0.698966	0	1.31082	1.74355	0	0.987941	5.49359	2.91922	1.25349	6.29585	0	0.79366	0.353985	0.958443	1.15149	11.7746	0.383801	1.91028	1.55438	0.0337716
PE_40:9_[M-H]1-	784.492	0.2	0.175	2	10.2759	0	6.72075	10.1186	7.0654	0	5.57593	10.2218	0	0	1.44143	4.70608	6.36552	4.84492	5.41808	6.06531	7.59995	8.13461	12.4023	8.34952	12.0249	9.0656	1.89667	9.63009	4.52921	5.30484	8.10855	7.28852	5.14521	0.806937	8.38862	0	11.1235	9.37927	0	12.3236	11.716	6.63576	4.39124	4.16884	0	8.72942	9.05621	0	8.25911
PE_41:4_[M-H]1-	808.586	0.5875	0.6	0	0.629454	0	0	0	0	0	1.28067	1.57435	0	1.15055	0	0	0	0.352618	0	0.452569	0.608614	0	0.316958	0	3.4834	0	0	0.000442638	0	0.429085	0	0	0	0	0	0	0	2.14278	1.02915	0	0	0.593259	0	0.628502	0	0.549467	0.0165695	0	0
PE_42:1_[M-H]1-	828.649	0.1625	0	2	3.38919	0	5.76633	6.65561	9.86111	2.55068	7.8946	6.19313	0	1.81741	0	14.66	7.93631	16.5639	0.661906	12.6408	6.23965	2.40596	5.3352	3.16906	0	8.34956	1.61946	9.3182	1.16711	6.64153	1.92973	4.33484	3.94427	0	5.61568	1.9285	0	7.23595	0	5.71084	4.64173	5.656	17.5106	10.8134	1.74634	3.72295	8.02998	1.59479	5.69407
PE_42:10_[M-H]1-	810.508	0.1875	0.05	2	15.1306	0	12.9031	14.2876	7.36988	0	17.2049	17.899	0	0	17.8401	9.16485	11.5805	8.32209	5.74914	7.99782	8.99787	11.072	16.6956	10.196	15.9884	11.5438	0	12.3395	7.37482	12.9986	15.0482	10.1506	13.6813	13.4961	1.53369	0	0.146008	25.9043	0	15.8586	3.16907	11.0795	8.56927	7.94865	0	13.6503	13.3035	0	11.5064
PE_42:11_[M-H]1-	808.492	0.1375	0.075	2	15.3321	0	7.62751	10.9831	2.9644	20.0201	9.47726	4.5503	0	0	28.2784	2.68252	8.01481	4.54398	22.7969	4.31205	2.06803	4.56207	13.8686	5.5914	0.228038	9.8208	0	9.41142	15.8937	4.85212	6.24383	4.52463	6.27443	32.2138	1.53159	23.9857	0	10.9845	17.2769	11.0139	1.2507	4.63561	1.8643	3.50925	0	9.48996	8.54314	9.1838	8.71144
PE_43:0_[M-H]1-	844.68	0	0	2	52.6607	218.125	59.3518	52.7739	29.45	138.305	68.668	22.2723	239.311	244.406	44.7863	39.9982	57.9507	47.396	20.0291	60.0249	17.6559	19.2851	57.152	82.9809	18.7514	39.8512	208.367	31.2212	65.5535	66.7335	88.4405	20.0527	29.5461	42.2802	22.4406	99.3668	14.8076	11.2214	153.229	38.5739	23.5279	37.3414	27.1398	39.3638	228.745	38.8248	31.3569	150.362	37.1617
PE_43:1_[M-H]1-	842.664	0.0625	0	2	3.76306	3.46185	4.84799	8.14117	9.06233	2.13981	5.65289	11.9875	10.3121	8.11025	0.555327	5.99112	15.3806	10.3069	0	6.72225	5.77559	3.47027	6.6056	2.05655	0	4.55152	2.1503	9.89399	0.0449	4.2153	7.03519	5.8193	7.81186	1.27382	1.19011	0	0	6.19462	3.89535	7.22622	2.11851	6.53226	10.352	7.99945	3.25508	3.98366	9.17263	3.67104	8.50739
PE_43:2_[M-H]1-	840.649	0.275	0.0125	2	0.985241	0	0.0361235	0.587696	1.75867	0	0.0686606	0	0	1.59651	2.4483	0.834012	0.891121	0.959012	5.83379	1.12425	0.672896	0.0664249	0	0	0	0.0932684	1.99964	0.8299	0.0346134	0.718294	0.0389418	0	0.0500677	0	0.536965	0	0	0.900299	0	0.495295	0	0.561201	1.40057	0.220484	0	0.0540256	0.0392555	2.05906	1.09993
PE_44:2_[M-H]1-	854.664	0.3125	0.4	2	0.576535	2.98209	1.78383	0	4.44618	0	0.825748	1.91702	1.62901	0	0	1.14465	1.0381	5.32179	0	3.38432	3.08806	0	0.339738	1.33349	1.35789	0.955777	0	0.771879	1.07343	1.89876	0	0.670813	1.38947	0	0	1.39671	3.51475	5.0219	1.09141	0	1.18	0.890393	5.28523	1.99238	0	1.10733	0.928027	0	1.27875
PE-O_30:0_[M-H]1-	648.497	0.5875	0.7875	0	0	1.60136	0	0.548521	0.529909	0	0	0	2.06505	1.74118	0	0.964229	0.432984	0	0.855676	0	0.998202	0.564804	0.449904	0	0	0	0	0	0	0	0	0	0.617755	0	0	0	0	0	1.8257	0	0	0	0.550692	0	1.82974	0.589864	0	0	0.473826
PE-O_35:0_[M-H]1-	718.576	0.65	0.625	0	0	0	1.98087	0	0.872763	0	0	0.510831	0	0	0	0.483863	0	0	0	0	1.37157	1.18787	0	1.10304	0	0	0	0	0	0	0	1.05261	1.23577	0	0	0	3.31102	0.758172	0	0	0	0	0	0	0	0	0	0	0.451366
PE-O_36:0_[M-H]1-	732.591	0.4125	0.55	1	0	0	0.565667	1.0097	1.85692	0	0	0.669037	0	0	0.836744	2.5014	0.409374	1.68942	0	0.755347	2.49799	0	0.409427	0	1.89602	1.2328	0	2.62463	0	0	0	0.502371	0.671016	0	0	0	0	2.89396	0	0	0.940189	0.612278	6.01962	0.83301	0	0.587965	0.782343	0	0.71323
PE-O_40:2_[M-H]1-	784.623	0.225	0.2375	2	54.6064	0	76.8477	61.7828	100.725	0	54.0109	20.8745	0	0	17.2775	111.804	53.2621	105.922	0	101.261	104.039	56.2623	29.3301	31.7866	24.6063	96.928	0	88.3537	12.8364	56.5235	38.176	51.6127	64.7669	6.15873	19.9798	0	0	45.3245	0	38.2057	28.8523	72.8003	142.823	101.342	0	82.946	63.7573	0	68.7515
PE-O_40:3_[M-H]1-	782.607	0.2375	0.2375	2	26.3262	0	21.8727	21.249	34.7724	0	6.81095	2.40279	0	0	3.74018	37.3733	19.9569	36.7983	0.725432	25.7478	38.1714	18.4901	10.6767	1.91988	0	44.2636	0	43.0565	0	12.3929	6.23918	19.0207	17.5149	0.940922	4.17509	0	2.26157	15.4686	0	15.4773	6.55574	30.0347	52.4062	35.4469	1.43108	37.0181	34.762	0	31.9324
PE-P_32:1_[M-H]1-	672.497	0.425	0.3875	2	0.601833	0	3.9806	0	7.80242	0	1.39116	2.4431	0	0	0	5.81071	0	5.257	0	0	4.53344	5.54539	0	0	1.54717	0.449018	0	0.381096	2.48976	1.15253	4.93565	5.64322	5.9597	0	2.17634	0	2.4514	1.80671	0	0	2.72711	6.92403	6.08085	4.75089	0	1.34438	0.359925	0	0.96194
PE-P_33:2_[M-H]1-	684.497	0.525	0.475	1	0	0	1.80708	0	4.32885	0	1.43492	1.3373	0	0	0	1.72746	0	3.63986	0.722162	2.82302	2.1684	4.24121	0.434263	1.00941	0	0	0	0	0	0.672096	3.04111	2.7845	3.01235	0	1.38748	0	0	0.772597	0	0	2.84318	2.47043	3.54128	2.0013	0	0	0	0	0.954451
PE-P_42:2_[M-H]1-	810.638	0.25	0.225	2	41.9678	0	44.2697	44.0304	62.8357	0	23.4071	6.58744	0	0	8.6085	66.033	45.7935	68.6115	0	73.5342	61.0969	20.0849	19.4516	17.6914	3.87461	72.5152	0	73.6449	1.7202	30.2761	9.92232	29.69	39.4033	0.962205	21.197	0	0	26.205	0	33.6831	5.96431	45.1382	92.1799	57.9003	0	63.7488	58.4683	0	61.7833
PI(30:0)	781.487	0.4125	0.6	1	0	0	0.603564	0	1.23145	0	0.566211	1.09373	0	1.32223	0.966026	0.505762	0	0.498097	0.825029	0.920152	0	0.50223	0	0.943112	1.50294	0	0	0	1.22596	0.698475	0	0.867156	1.32311	0	0	0	2.9518	0.766133	0	0	1.06699	1.16555	0	0	1.63363	0	0	1.13916	0.547789
PI(30:3)	775.44	0.675	0.8	0	0.496044	0	0.781041	0	0.299807	0	0.57301	0	0	0	0	0	0	0.51485	0	0.853015	0	0	0	0	0	0	0	0	1.44174	0	0	0.458338	0	0	0.979698	0	0	0	1.59928	0	0	0	0	0.465144	0	0	0.663981	2.88039	0.398011
PI(31:4)	787.44	0.7375	0.725	0	0	0	0	0	0.62774	0	0	0	1.10603	0	0	0	0.269947	0	0	0	0	0	0	0	0	0	2.94916	0	0	0.612933	0	0	0	1.75203	0	1.32435	2.75016	0	1.17308	0.399432	0	0.550262	0	0	0	0	0	0	0
PI(32:6)	797.424	0.8125	0.7625	0	0	0	0	0	0	0	0	0	0.73129	0	0	0	0	0	0	0	0	0	0	0	0	0	0	0.211195	0	0	0	0	0.500057	0	0	0	2.46945	0	0	0	0	0	0	0	1.16613	0	0	0	0
PI(40:1)	919.628	0.5375	0.8125	0	0.574579	0	0	0.503926	1.20092	4.23884	0	0	1.8728	0	4.11464	0.295182	0.485674	0.194656	2.07371	0.766619	0.71827	0	0.442055	0	0	0	0	0	0	0.705583	0.416952	0	0.350524	3.74648	0	0	2.89797	0.678329	7.79313	0	0	0.566476	0	0	0	0	0	0	0
PS_26:1_[M-H]1-	648.388	0.45	0.2375	2	1.39406	0	1.49995	0.581975	0	1.87402	0.56398	0.479499	0	1.68867	0	0	0.672328	0	0	0	1.30821	1.48626	0.880977	0.834595	0	0.429316	0	0	0	0	0	0.538668	0.98821	0	1.32385	0	2.90429	0	0	1.98973	2.2694	0.871092	0	0	1.9299	0.661991	1.88982	0	0.47273
PS_27:1_[M-H]1-	662.404	0.625	0.725	0	0	0	0	0	0	0	0.822117	0.49206	0	0	0	0	0	0.494757	0	0	0	0	0	0	0	0	0	0.751708	0	0.70445	0	0	0	0.981994	0	4.52255	3.55875	0	1.63109	0.271515	1.13933	0	0.651772	0.442357	0	0	0	0	0.46773
PS_29:1_[M-H]1-	690.435	0.6875	0.4	1	0	0	0	0	0	0	0	0	3.19685	3.07652	0	0	0.733074	0	0	0.735707	0	0	0	0.658705	0	0	0	0	0	0	0	0	0	0	0	0	0	0	0	0	0.837241	0	0	0	3.71048	0.663763	0	2.24347	0
PS_29:2_[M-H]1-	688.419	0.45	0.6875	1	0.5112	0	0.659571	0	0.532331	6.72519	0.535563	0	0	0	9.49998	0	0.404244	0	22.0287	0.781412	0	0	0.51035	1.16278	0	0	1.81387	0	0	1.15653	0	0	0	17.0244	1.09527	5.11995	0	0	1.9963	0	0	0	0	0	0	0	0	3.09799	0.42914
PS_32:3_[M-H]1-	728.451	0.65	0.8625	0	0	0	0	0	0	0	0	0.780319	1.31266	1.57213	12.6845	0	0	0.513344	11.2581	0	0	0.555353	0	0.831209	0	0	0	0	0	0	0	0	0	4.58179	0	0	0	0	1.69857	0	0.773367	0	0.634538	0	0	0	0	0	0
PS_34:6_[M-H]1-	750.435	0.8375	0.825	0	0	0	0	0	0	0	0	0	0	0	0	0	0	0	0	0	0	0	0	0	0	0	0	0	0	0	0	0.351921	0	0	0	0	0	0	0	0	0	0.576537	0	0	0	0	0	1.8137	0
PS_38:6_[M-H]1-	806.498	0.4875	0.175	2	1.88887	0	0	1.44214	0.73662	2.05597	0	3.43928	0	0	0	0.539833	1.51107	0	0	0	0	0	1.80403	0	4.39212	1.97098	4.38232	0.469726	0	0	0.734724	0	0	0	0	0	0	3.38365	0	0.55769	0	0	0	0	0	0.669697	1.78149	0	1.06976
PS-O_29:1_[M-H]1-	664.456	0.375	0.5125	1	0.698504	0	0	0	0	2.0725	0.565713	0.80007	1.62935	1.72993	2.74783	0.423319	0.351911	0	12.8821	0.615165	0	2.52175	1.77705	1.01088	1.44589	0.488068	0	0.348239	3.91194	2.25116	0	1.42078	1.37569	3.79475	0	0	0	0	1.64505	0	0	1.18161	0	0.507557	0	0	1.08492	4.80122	0
SM_31:1_[M+OAC]1-	721.55	0.075	0.1375	2	0.488907	0	1.79078	1.30918	5.87736	0	6.71781	13.555	5.07875	1.68237	1.8373	4.47855	3.48192	5.90734	2.44203	6.25409	3.61878	3.84	0.714059	3.36276	4.7465	0.660638	0	1.96233	5.99835	5.09174	6.11198	11.2026	8.22565	4.44305	4.00289	5.29691	5.20614	3.76261	0	0.629525	8.55685	5.0633	1.14466	7.42814	0	2.60724	3.76206	3.3564	1.87575
SM_36:0_[M+OAC]1-	791.628	0	0	2	10.3983	8.50034	41.8709	16.4326	53.7108	4.25572	17.3153	16.8729	7.17086	6.16454	11.4264	38.6477	63.7959	34.7827	1.60421	17.1849	30.7733	71.4799	21.5959	17.938	1.28202	21.2052	1.9841	26.377	4.2634	14.4612	28.1364	84.8967	78.5606	3.72604	14.6905	4.34308	8.44851	6.9504	3.93332	39.8385	31.9416	45.1226	21.4339	72.2352	4.56653	32.622	38.1715	2.61105	43.0113
SM_36:3_[M+OAC]1-	785.581	0.1	0.125	2	1.51427	5.17333	1.75151	1.36793	1.78915	6.20411	0.68629	4.10054	9.5237	7.82544	0	2.92705	1.54415	1.03136	0.609014	2.40465	2.11335	1.15056	0.549719	0	1.1579	3.92574	2.00327	3.66329	1.13398	0.728232	1.06142	2.43904	1.01076	1.08485	1.18328	10.1187	2.47503	0.00944172	4.69607	0	1.32243	1.40208	2.53919	2.08082	1.51518	1.45247	1.35012	7.72474	0.894361
SM_40:3_[M+OAC]1-	841.644	0.225	0.0125	2	1.39654	5.58411	0.828135	2.0117	4.24541	3.15341	1.2701	2.41251	0	1.76281	0.509281	1.49408	2.56033	1.98368	0	1.36415	0.436049	0.65697	0	0	0	4.26708	2.08622	2.94988	2.96236	0	1.23076	5.3348	9.05948	0	1.31733	0	0	0	6.77492	1.0145	2.88023	0	2.00367	3.83251	0.0326306	1.96898	1.49003	0	2.91054
[truncated: 131 more columns]
