# Supplementary material for: Lipid extraction from dried blood spots and dried milk spots for untargeted high throughput lipidomics
Source: Royal Society of Chemistry journal article supplement (doi:10.1039/d0mo00102c), 2020-09-10
Supplement: d0mo00102c4.xlsx [file d0mo00102c4.xlsx]

## Sheet: +ve
DMS solvent test (+ve ionisation mode)
								Total signal	693960	789560	413221	231240	331895	450567	307297	408263	828381	763876	601111	282102	484503	290106	482645	558417	407302	179868	195587	362613	407732	394646	275157	195469	228960	157403	103265	292290	243120	258569	72413.1	125157	508716	253055	267142	251358	310798	359932	145707	431843	506330
								0s/samples	65	67	68	70	57	54	58	48	57	59	52	57	56	60	54	47	62	74	68	59	59	62	62	63	76	70	72	59	63	68	77	68	73	75	66	70	68	62	68	52	68
		0s						Expt	DMT_AQ_01_Box2	DMT_AQ_02_Box2	DMT_AQ_03_Box2	DMT_AQ_04_Box2	DMT_AQ_05_Box2	DMT_AQ_06_Box2	DMT_AQ_07_Box2	DMT_AQ_08_Box2	DMT_AQ_09_Box2	DMT_AQ_10_Box2	DMT_AQ_11_Box2	DMT_AQ_12_Box2	DMT_AQ_13_Box2	DMT_AQ_14_Box2	DMT_AQ_15_Box2	DMT_AQ_16_Box2	DT_AQ_01_Box2	DT_AQ_02_Box2	DT_AQ_03_Box2	DT_AQ_04_Box2	DT_AQ_05_Box2	DT_AQ_06_Box2	DT_AQ_07_Box2	DT_AQ_08_Box2	DT_AQ_09_Box2	DT_AQ_10_Box2	DT_AQ_11_Box2	DT_AQ_12_Box2	DT_AQ_13_Box2	DT_AQ_14_Box2	DT_AQ_15_Box2	DT_AQ_16_Box2	TBME_AQ_01_Box2	TBME_AQ_02_Box2	TBME_AQ_03_Box2	TBME_AQ_04_Box2	TBME_AQ_05_Box2	TBME_AQ_06_Box2	TBME_AQ_07_Box2	TBME_AQ_08_Box2	TBME_AQ_09_Box2
Lipid variable	m/z	DMT_AQ	DT_AQ	TBME_AQ	XMI_dry	XT_AQ	Deviations	0s	Furse_Ex049_A02_DMT_AQ_01_Box2.mzXML	Furse_Ex049_B02_DMT_AQ_02_Box2.mzXML	Furse_Ex049_C02_DMT_AQ_03_Box2.mzXML	Furse_Ex049_D02_DMT_AQ_04_Box2.mzXML	Furse_Ex049_E02_DMT_AQ_05_Box2.mzXML	Furse_Ex049_F02_DMT_AQ_06_Box2.mzXML	Furse_Ex049_G02_DMT_AQ_07_Box2.mzXML	Furse_Ex049_H02_DMT_AQ_08_Box2.mzXML	Furse_Ex049_A03_DMT_AQ_09_Box2.mzXML	Furse_Ex049_B03_DMT_AQ_10_Box2.mzXML	Furse_Ex049_C03_DMT_AQ_11_Box2.mzXML	Furse_Ex049_D03_DMT_AQ_12_Box2.mzXML	Furse_Ex049_E03_DMT_AQ_13_Box2.mzXML	Furse_Ex049_F03_DMT_AQ_14_Box2.mzXML	Furse_Ex049_G03_DMT_AQ_15_Box2.mzXML	Furse_Ex049_H03_DMT_AQ_16_Box2.mzXML	Furse_Ex049_A06_DT_AQ_01_Box2.mzXML	Furse_Ex049_B06_DT_AQ_02_Box2.mzXML	Furse_Ex049_C06_DT_AQ_03_Box2.mzXML	Furse_Ex049_D06_DT_AQ_04_Box2.mzXML	Furse_Ex049_E06_DT_AQ_05_Box2.mzXML	Furse_Ex049_F06_DT_AQ_06_Box2.mzXML	Furse_Ex049_G06_DT_AQ_07_Box2.mzXML	Furse_Ex049_H06_DT_AQ_08_Box2.mzXML	Furse_Ex049_A07_DT_AQ_09_Box2.mzXML	Furse_Ex049_B07_DT_AQ_10_Box2.mzXML	Furse_Ex049_C07_DT_AQ_11_Box2.mzXML	Furse_Ex049_D07_DT_AQ_12_Box2.mzXML	Furse_Ex049_E07_DT_AQ_13_Box2.mzXML	Furse_Ex049_F07_DT_AQ_14_Box2.mzXML	Furse_Ex049_G07_DT_AQ_15_Box2.mzXML	Furse_Ex049_H07_DT_AQ_16_Box2.mzXML	Furse_Ex049_A04_TBME_AQ_01_Box2.mzXML	Furse_Ex049_B04_TBME_AQ_02_Box2.mzXML	Furse_Ex049_C04_TBME_AQ_03_Box2.mzXML	Furse_Ex049_D04_TBME_AQ_04_Box2.mzXML	Furse_Ex049_E04_TBME_AQ_05_Box2.mzXML	Furse_Ex049_F04_TBME_AQ_06_Box2.mzXML	Furse_Ex049_G04_TBME_AQ_07_Box2.mzXML	Furse_Ex049_H04_TBME_AQ_08_Box2.mzXML	Furse_Ex049_A05_TBME_AQ_09_Box2.mzXML
DG(34:00)_[M+NH4]1+	614.572	0.5625	0.75	0.625	0.5	0.625	4.09412	4	0	0	0	0	0	218.86	183.71	0	0	327.528	131.738	0	197.683	365.988	128.555	0	106.915	0	177.816	0	0	0	70.3144	0	0	0	0	0	79.3082	0	0	0	0	106.919	175.177	0	0	96.3875	0	0	418.408
DG(36:02)_[M+NH4]1+	638.572	0.6875	0.75	0.875	0.6875	0.9375	5.16778	2	0	167.998	0	0	90.1546	0	159.634	0	0	97.983	0	0	106.415	0	0	0	127.845	0	0	0	0	100.723	0	0	0	0	0	0	0	89.1158	0	66.73	0	0	0	0	0	0	0	0	0
DG(36:03)_[M+H-H2O]1+	601.519	0	0	0	0	0	1.66246	5	209908	243909	130368	74874.8	103044	129983	96173.4	110194	240174	236961	175663	84210.3	144994	88428.8	142349	156614	117887	66135.7	61051.1	110552	118379	115778	83233.3	55793.9	70170.8	52615.3	35706.8	80599.2	77643.9	76551.5	26028.7	39790.7	152913	75800.3	82555.5	76821.9	92535	107158	49070.7	123174	146384
DG(36:04)_[M+H-H2O]1+	599.503	0	0	0	0	0	1.9059	5	44218	49033.6	27038.1	15706.4	22697.8	26528.4	20362.8	23180.7	47360.1	50723	37701.2	17955.7	30536.3	19152	30189.7	31999.3	23535	13078.2	12453.9	22831.3	25004.7	24844.3	16707.4	11503	14228	10940.6	7665.54	16913.3	16326.1	16564.6	4632.06	7971.51	30523.7	14589.8	16103.8	16384.2	18417.1	22105.7	9699.45	25105.8	28669.3
DG(36:05)_[M+H-H2O]1+	597.488	0	0	0	0	0.125	4.50805	5	6198.22	4514.56	2279.02	961.179	1670.22	2609.32	1757.2	1631.62	6898.28	5251.14	3976.16	1264.05	3126.68	923.045	2907.29	2332.71	1956.42	793.183	482.394	1691.71	1950.53	2229.07	1298.83	384.078	1089.27	343.603	297.746	1277.26	738.362	1029.96	199.246	271.493	2763.92	848.363	905.532	885.114	1607.65	1664.03	400.321	2805.06	2577.65
DG(38:02)_[M+H-H2O]1+	631.566	0	0	0	0	0	1.40798	5	13106.2	15467.3	6831.23	3357.11	5293.44	6965.83	4351.11	6810.55	14227	14658.3	10647.7	3341.99	7438.66	4732.67	8116.3	8554.19	6122.62	2859.97	2935.09	6147.18	5508.21	6001.18	4060.93	1676.33	3304.68	1999.8	648.386	5265.92	4074.6	3600.99	1097.32	1404.68	9748.68	3129.07	4652.2	4159.41	6043.25	6971.45	2137.05	8178.51	9119.66
DG(38:06)_[M+H-H2O]1+	623.503	0.5625	0.75	0.8125	0.4375	0.75	5.70967	2	212.634	0	0	0	0	0	72.3281	157.026	130.636	0	102.826	0	0	0	86.3097	102.873	0	0	69.5115	0	110.049	0	0	0	0	0	0	54.8561	0	0	0	70.5556	0	0	79.9187	0	87.0485	0	0	0	0
DG(38:06)_[M+NH4]1+	623.504	0.5625	0.75	0.8125	0.4375	0.6875	6.65852	3	212.634	0	0	0	0	0	72.3281	157.026	130.636	0	102.826	0	0	0	86.3097	102.873	0	0	69.5115	0	110.049	0	0	0	0	0	0	54.8561	0	0	0	70.5556	0	0	79.9187	0	87.0485	0	0	0	0
DG(39:03)_[M+NH4]1+	678.603	0.875	1	0.875	0.875	0.625	8.93993	1	0	0	0	0	169.932	0	0	0	0	0	0	0	0	0	0	176.991	0	0	0	0	0	0	0	0	0	0	0	0	0	0	0	0	0	0	0	0	0	0	0	0	0
DG(40:01)_[M+H-H2O]1+	661.613	0	0.0625	0	0.0625	0.1875	2.10395	5	3414.23	4681.24	1596.51	428.852	703.506	1753.09	572.575	1360.13	5380.48	4315.09	3449.71	648.886	1215.09	1347.26	1849.45	2072.81	959.369	622.03	489.443	1497.54	1855.41	1571.32	801.138	498.313	735.31	324.347	0	1259.64	330.046	497.445	162.539	168.367	2396.94	1252.36	624.479	573.489	307.426	818.343	245.255	2212.25	2946.52
DG(40:06)_[M+H-H2O]1+	651.535	0.375	0.5	0.875	0.6875	0.8125	5.70022	3	239.037	281.434	0	0	84.9961	0	74.2053	108.369	227.67	157.151	131.121	75.4675	0	0	96.9418	0	130.857	0	0	74.6417	76.334	157.501	68.863	65.9595	0	0	0	0	0	81.3399	0	61.893	0	0	0	0	0	0	0	273.296	0
DG(42:01)_[M+H-H2O]1+	689.644	0.4375	0.5	0.4375	0.875	0.6875	3.69756	4	0	304.524	0	78.1259	0	96.3487	0	206.525	376.223	123.209	102.879	0	0	0	114.725	80.2551	91.3074	0	0	77.4116	217.412	193.987	86.3081	0	0	0	57.3617	0	94.6262	91.9423	0	0	0	0	0	97.3104	0	0	0	108.589	220.211
LPI(18:00)_[M+NH4]1+	618.361	0.5625	0.875	0.9375	0.875	0.75	5.28615	1	0	0	0	0	0	100.355	202.887	47.8021	0	153.57	0	64.9531	0	95.9229	0	224.895	0	0	0	96.905	0	0	0	0	0	0	44.0355	0	0	0	0	0	0	0	0	0	0	0	0	0	0
PA(26:01)	563.371	0.9375	1	0.75	0.5	0.9375	8.20063	1	0	0	0	0	0	0	0	0	176.934	0	0	0	0	0	0	0	0	0	0	0	0	0	0	0	0	0	0	0	0	0	0	0	0	0	0	69.8106	85.2068	97.4005	0	0	0
PA(39:03)_[M+Na]1+	763.525	0.8125	0.875	1	0.6875	0.9375	6.47581	1	0	0	0	0	56.8087	0	0	0	0	0	0	0	92.018	0	86.9681	0	0	0	0	0	0	0	0	0	0	0	0	0	67.592	0	0	55.4079	0	0	0	0	0	0	0	0	0
PA(42:00)_[M+Na]1+	811.619	0.6875	0.875	0.9375	0.8125	0.9375	5.89101	1	113.683	0	72.0753	0	54.8536	0	65.6439	315.686	0	0	0	0	0	0	0	0	0	0	0	0	0	0	0	73.532	0	0	0	0	0	0	44.5074	0	0	0	0	0	0	0	0	0	0
PA(43:00)_[M+Na]1+	825.634	0.9375	0.875	0.8125	0.6875	0.9375	8.75517	1	0	0	0	0	0	0	0	0	0	0	0	0	169.074	0	0	0	0	0	0	0	0	0	0	0	146.583	0	73.0023	0	0	0	0	0	0	0	0	0	0	71.2367	0	0	0
PC(32:00) & PE(35:00)	734.57	0	0	0.5625	0	0.8125	4.41777	4	5204.53	5584.11	5678.34	2574.21	4624.6	5383.29	4829.52	7062.23	3382.62	3800.87	4625.04	3791.42	7661.45	3775.33	2235.79	5876.6	1431.35	75.2477	239.332	359.703	1302.84	1375.73	415.223	676.255	765.769	165.613	977.829	198.027	500.318	817.006	556.423	176.532	98.1051	89.3635	0	0	135.022	96.5794	0	195.144	0
PC(34:02) & PE(37:02)	758.57	0	0.5625	0.875	0	1	5.34359	3	1208.81	1415.97	869.912	466.154	1661.96	1097.84	1053.04	2730.24	608.457	94.5086	1512.92	516.486	2103.48	204.026	480.389	823.283	0	76.1859	69.1825	176.563	0	0	0	77.7181	0	0	134.741	0	95.1537	184.847	0	0	0	0	0	0	0	0	0	0	0
PC(36:02) & PE(39:02)	786.601	0	0	0.5625	0	0.875	4.44733	4	4039.19	3166.15	4313.5	1854.44	4030.42	4705.97	4050.74	6669.8	2341.96	1719.71	3384.48	3089.38	6324.17	2325.45	2651.94	4453.67	288.753	63.3779	360.122	551.862	919.394	774.71	823.897	898.854	705.356	150.582	440.789	88.5601	867.934	420.262	366.669	255.143	0	80.8785	82.0361	0	73.704	0	63.9272	157.874	0
PC(36:03) & PE(39:03)	784.586	0	0.3125	0.75	0	0.875	5.03581	3	487.141	512.77	523.808	309.363	819.73	786.826	973.834	2185.74	547.332	134.699	719.109	641.893	1136.74	675.542	351.04	1086.42	100.339	70.9046	202.484	0	0	74.037	73.4468	99.779	81.1804	0	79.9252	70.8776	210.663	85.7758	0	0	202.344	0	0	0	0	0	434.449	0	439.876
PC(36:04) & PE(39:04)	782.57	0.1875	0.875	0.9375	0	0.875	7.04273	2	0	96.465	351.251	70.8022	605.159	574.702	758.158	950.38	0	0	139.013	284.899	575.605	197.6	107.464	535.032	0	0	0	0	0	0	0	0	0	0	87.9418	0	93.5647	0	0	0	0	0	85.0176	0	0	0	0	0	0
PC(38:05) & PE(41:05)	808.586	0.8125	0.9375	1	0.5	0.8125	6.40916	1	0	0	0	0	0	103.64	0	80.6634	109.94	0	0	0	0	0	0	0	0	0	0	68.3175	0	0	0	0	0	0	0	0	0	0	0	0	0	0	0	0	0	0	0	0	0
PC(44:02)_[M+H]1+	898.726	0	0.375	0.6875	0.0625	0.8125	6.19244	4	9812.86	123.699	4287.53	364.415	2655.01	7726.63	3577.65	5355.21	7180.57	4495.37	5925.22	3808.97	3315.02	2773.01	4199.36	7113.5	258.576	0	79.5177	808.082	84.6208	430.647	348.223	1872.94	0	0	158.521	86.2014	0	0	677.669	0	0	0	0	0	0	0	0	88.909	0
PC(44:03)_[M+H]1+	896.71	0.0625	1	0.875	0.3125	0.875	6.35319	2	1291.63	0	243.301	72.9527	96.3169	1276.45	303.976	687.094	393.39	169.212	691.94	192.983	342.311	91.8309	244.492	800.206	0	0	0	0	0	0	0	0	0	0	0	0	0	0	0	0	0	0	0	0	0	0	0	0	0
PC(44:04)_[M+H]1+	894.695	0.6875	0.875	0.9375	0.8125	0.9375	6.8978	1	114.949	0	0	0	0	193.876	0	0	0	0	106.308	113.502	0	0	0	96.5316	0	0	0	0	92.9706	0	0	0	165.404	0	0	0	0	0	0	0	0	0	0	0	0	0	0	0	0
PC(46:05)	920.711	0.6875	0.9375	0.9375	0.8125	0.875	6.07502	1	0	0	0	68.8427	120.019	136.122	0	0	0	0	91.9131	0	91.2333	0	0	0	0	0	0	0	0	0	0	0	0	0	0	0	0	0	68.0944	0	0	0	83.9388	0	0	0	0	0	0
PC-O(40:01)_[M+H]1+	830.7	0.3125	0.375	0.1875	0.0625	0.625	8.96834	5	0	44.4606	58.8971	0	13.0145	39.1203	0	0	0	32.9813	9.80785	50.643	18.5868	4.21872	77.0955	247.376	0	105.878	2.28056	7.8968	8.59406	2.02402	3.57139	0.684587	0.136739	0	0	28.1467	4.2313	0	0	0	11.5046	72.3848	0	6.27055	0.76808	0	1.17505	4.25888	83.0578
PC-O(40:06)_[M+H]1+	820.621	0.875	0.6875	0.6875	0.8125	0.4375	8.95847	3	0	0	0	0	0	0	0	0	0	0	87.6004	0	247.632	0	0	0	0	0	0	650.089	92.0388	0	75.539	0	0	0	276.016	239.306	0	0	0	0	0	0	0	109.345	0	0	0	0	0
PC-O(42:06)_[M+H]1+	848.653	1	1	0.8125	0.0625	0.875	7.50366	1	0	0	0	0	0	0	0	0	0	0	0	0	0	0	0	0	0	0	0	0	0	0	0	0	0	0	0	0	0	0	0	0	0	0	0	0	0	66.5783	26.337	74.9168	0
PC-O(46:00)	916.81	0.0625	0.3125	0.1875	0.3125	0.375	7.09136	5	102.651	195.098	76.7259	4.07115	59.3388	464.901	64.7722	125.723	347.122	803.185	152.956	0	286.132	69.3497	521.3	243.727	74.4266	0	42.3468	78.9528	3.54972	52.5447	3.41441	0	0	54.6448	0	3.05291	2.35734	6.92427	0	76.613	109.464	0	0.887844	120.956	80.6084	138.444	0	617.823	273.297
PC-O(46:01) & PC-P(46:00)	914.794	0.4375	0.625	0.875	0.6875	0.8125	8.87267	3	166.191	60.8622	38.3964	0	0	82.7494	26.0425	0	0	219.195	135.828	0	77.9911	0	81.6718	0	36.5253	0	0	64.6525	155.212	0	0	0	0	64.4342	0	73.3918	0	0	0	68.517	0	0	0	0	0	0	0	0	284.624
PC-P(40:05) & PC-O(40:06)	820.622	0.875	0.6875	0.6875	0.875	0.625	7.00688	3	0	0	0	0	0	0	0	0	0	0	87.6004	0	247.632	0	0	0	0	0	0	650.089	92.0388	0	75.539	0	0	0	276.016	239.306	0	0	0	0	0	0	0	109.345	0	0	0	0	0
PC-P(42:05)	848.653	1	1	0.8125	0.0625	0.875	8.00798	1	0	0	0	0	0	0	0	0	0	0	0	0	0	0	0	0	0	0	0	0	0	0	0	0	0	0	0	0	0	0	0	0	0	0	0	0	0	66.5783	26.337	74.9168	0
PC-P(47:01)	926.794	0	0.1875	0	0.125	0.375	7.97576	5	441.309	3864.99	186.902	41.4119	35.7728	249.173	145.935	157.24	3913.18	2071.64	434.069	1.23646	47.6572	0.933623	193.989	387.604	209.591	122.503	172.421	363.044	220.753	118.295	85.1164	0	73.3159	44.8269	0.470283	72.4984	177.352	89.0522	0	0	452.299	200.6	44.6846	69.8757	124.963	51.503	29.9517	736.211	611.878
PE(36:08)_[M+H]1+ / PA(38:09)_[M+NH4]1+	732.46	0.875	0.9375	0.1875	1	0.9375	8.90455	1	0	0	0	0	0	0	155.646	0	0	137.02	0	0	0	0	0	0	0	0	0	0	0	0	0	0	0	0	0	0	67.4912	0	0	0	1105.62	2188.06	2385.68	0	1595.66	924.679	451.314	2220.61	309.263
PE(48:01) & PC(45:01)	914.758	0.9375	0.8125	0.875	0.625	0.875	7.77888	1	0	0	0	0	0	0	0	0	0	0	0	0	0	0	81.5118	0	0	0	0	46.5508	0	0	70.2782	79.4947	0	0	0	0	0	0	0	0	107.612	68.1664	0	0	0	0	0	0	0
PE-O(34:04)_[M+H]1+	698.512	0.875	1	0.9375	0.6875	0.9375	8.49058	1	0	0	0	0	61.8101	0	0	0	142.625	0	0	0	0	0	0	0	0	0	0	0	0	0	0	0	0	0	0	0	0	0	0	0	0	0	0	0	0	88.6664	0	0	0
PG(29:00)_[M+Na]1+	703.452	0.8125	0.6875	0.9375	0.9375	1	6.99149	1	0	0	0	0	0	0	0	74.2924	0	0	0	73.8079	0	0	0	120.771	0	0	0	77.4053	0	67.1353	99.173	0	0	0	0	0	61.8808	0	0	39.073	0	0	0	0	84.2315	0	0	0	0
PG(31:02)_[M+Na]1+ / PG(33:05)_[M+H]1+	727.452	0.8125	0.5625	0.75	0.5	0.8125	6.44195	2	0	0	0	0	97.0742	0	0	184.153	0	0	0	0	0	0	0	232.821	117.783	0	0	0	0	159.289	70.2843	2.21401	0	0.48995	0	0	0	50.8496	0	5.24196	0	88.8913	0	0	0	197.694	133.686	0	0
PG(43:01)_[M+NH4]1+	892.7	0.9375	0.9375	0.875	0.5625	0.875	7.64223	1	0	0	0	0	0	0	0	0	0	0	0	0	0	0	112.439	0	0	0	0	0	0	0	0	0	0	0	0	0	0	0	71.6344	0	0	0	0	0	0	0	178.842	0	0
PG(44:00)_[M+NH4]1+	908.731	0.8125	0.8125	0.8125	0.4375	0.75	7.7058	1	0	0	0	0	78.1152	0	0	0	158.859	0	0	0	0	0	0	0.304226	0	0	0	0	0	0	0	0	0	0	70.5971	166.631	0	71.6356	0	0	0	0	0	88.6517	0	0	0	0	0
PG(44:01)_[M+Na]1+	911.671	0.8125	1	0.9375	0.625	1	7.75865	1	0	0	0	0	0	0	0	0	0	0	95.5492	42.1485	0	88.2172	0	0	0	0	0	0	0	0	0	0	0	0	0	0	0	0	0	0	0	0	0	0	0	0	0	0	0
PG-O(33:02)_[M+Na]1+	741.504	0.75	0.75	0.75	0.75	0.6875	7.51072	1	0	0	0	0	0	82.5075	0	0	0	0	93.599	0	0	0	110.094	79.0656	0	0	61.696	0	0	0	67.1767	0	0	0	0	91.7722	0	0	0	88.9421	0	0	0	0	0	66.503	0	1781	0
PG-O(37:02)_[M+Na]1+	797.567	0.875	0.8125	0.75	0.9375	0.6875	8.60706	1	0	0	0	0	0	0	0	0	105.593	0	0	51.1314	0	0	0	0	0	0	66.8816	0	0	0	0	0	0	0	0	0	0	0	44.61	71.7111	0	0	0	0	0	93.1298	0	562.107	0
PG-O(38:05)_[M+H]1+	783.553	0.8125	0.875	1	0.375	0.9375	8.35935	1	0	0	60.3882	0	0	181.197	0	0	0	0	0	63.3783	0	0	0	0	0	0	0	0	0	0	0	0	51.0092	0	0	0	0	0	0	68.6012	0	0	0	0	0	0	0	0	0
PG-O(42:02)_[M+Na]1+	867.645	0.75	0.8125	0.9375	0.6875	0.8125	8.90661	1	0	0	0	61.7892	0	0	0	49.5849	98.4054	305.479	0	0	0	0	0	0	0	0	0	0	0	0	0	60.8684	0	0	79.1656	44.7445	0	0	0	0	0	0	0	0	0	0	0	0	0
PI(32:03)_[M+H]1+	805.486	0.875	0.9375	0.9375	0.875	0.6875	8.55074	1	0	0	0	0	0	0	0	0	104.308	0	0	0	0	73.2679	0	0	0	0	0	0	0	0	0	0	0	0	0	0	0	58.0851	0	0	0	0	75.1317	0	0	0	0	0	0
PI(35:00)_[M+H]1+	853.58	1	0.9375	0.9375	0.1875	0.875	5.76396	1	0	0	0	0	0	0	0	0	0	0	0	0	0	0	0	0	0	0	66.9001	0	0	0	0	0	0	0	0	0	0	0	0	0	0	0	0	0	0	0	0	133.597	0
PI(44:05)_[M+NH4]1+	986.669	0.9375	1	1	0.75	0.6875	5.73901	1	0	0	0	0	0	0	0	0	0	0	0	0	0	0	0	77.4806	0	0	0	0	0	0	0	0	0	0	0	0	0	0	0	0	0	0	0	0	0	0	0	0	0
PI-O(39:00)_[M+Na]1+	917.645	0.9375	0.9375	0.9375	0.6875	0.8125	5.21988	1	0	0	0	0	0	0	0	0	0	88.6316	0	0	0	0	0	0	0	0	0	0	0	0	0	0	0	63.1436	0	0	0	0	0	0	0	0	87.3812	0	0	0	0	0	0
PI-O(40:00)_[M+Na]1+	931.661	1	0.8125	0.875	0.9375	0.6875	7.52539	1	0	0	0	0	0	0	0	0	0	0	0	0	0	0	0	0	0	0	0	0	0	0	0	72.9375	0	52.2812	0	0	0	0	57.674	0	0	0	0	0	0	0	61.398	14.8505	0
PI-O(40:01)_[M+H]1+	907.663	0.875	0.875	0.9375	0	0.9375	8.77858	1	0	0	0	0	0	0	0	65.4885	0	0	0	0	68.0391	0	0	0	0	62.9462	0	0	0	0	0	57.0424	0	0	0	0	0	0	0	0	0	0	0	0	0	0	0	183.891	0
PI-P(35:02)_[M+NH4]1+	850.58	0.9375	0.9375	0.625	0.875	0.8125	7.96935	1	0	0	0	0	0	91.5819	0	0	0	0	0	0	0	0	0	0	0	0	0	0	0	88.5896	0	0	0	0	0	0	0	0	0	0	0	0	0	0	0	94.9396	52.9631	429.685	135.887
PI-P(42:02)_[M+H]1+	931.663	1	0.8125	0.8125	0.9375	0.6875	7.53133	1	0	0	0	0	0	0	0	0	0	0	0	0	0	0	0	0	0	0	0	0	0	0	0	72.9375	0	52.2812	0	0	0	0	57.674	0	0	0	0	0	0	0	61.398	14.8505	0
PS(36:03)_[M+H]1+ / PG(36:05)_[M+NH4]1+	786.528	0.875	0.8125	0.5625	0.6875	0.75	4.58386	2	0	0	0	0	0	0	0	0.387887	0	0	0	0	0	0	66.9103	0	0	0	0	0	0	76.3249	0	0	0	0	0	0	0	0	0.825519	57.6876	0	0	0	0	0	0	139.529	45.0003	83.0357
PS(38:09)_[M+Na]1+	824.447	1	0.875	1	0.375	0.875	5.92063	1	0	0	0	0	0	0	0	0	0	0	0	0	0	0	0	0	0	0	0	0	0	0	0	70.0765	0	0	0	0	0	0	265.671	0	0	0	0	0	0	0	0	0	0
PS(40:00)_[M+H]1+ / PG(40:02)_[M+NH4]1+	848.638	0.9375	1	0.8125	0	0.8125	8.20319	1	0	0	0	0	99.7937	0	0	0	0	0	0	0	0	0	0	0	0	0	0	0	0	0	0	0	0	0	0	0	0	0	0	0	0	0	0	0	0	68.6622	72.5675	87.2544	0
PS-O(38:04)_[M+Na]1+	820.546	0.875	0.6875	0.75	0.75	0.5625	8.12779	2	0	0	0	0	0	0	0	0	0	0	0	0	423.528	0	0	88.6868	0	0	0	144.21	231.881	0	0	63.377	0	0	0	158.73	282.661	0	0	0	0	0	0	69.4632	101.876	0	0	0	0
PS-O(38:05)_[M+H]1+ / PG-P(38:06)_[M+NH4]1+	796.549	0.9375	0.8125	0.875	0.625	0.875	6.33655	1	0	0	0	0	0	0	0	133.498	0	0	0	0	0	0	0	0	52.9053	0	0	0	0	0	0	0	49.6258	0	0	0	0	78.5616	0	0	0	0	0	0	0	0	0	59.2286	0
PS-O(42:00)_[M+H]1+ / PG-O(42:02)_[M+NH4]1+	862.689	0.625	0.9375	0.8125	0.875	0.5625	8.57231	2	0	0	0	0	0	263.277	0	232.498	0	0	95.8172	365.168	0	0	215.731	225.649	0	0	0	0	0	0	0	0	0	201.006	0	0	0	0	0	0	0	0	0	64.2158	0	194.383	0	318.373	0
PS-P(36:05)_[M+H]1+	766.502	0.8125	0.6875	0.875	0.9375	0.625	8.97676	2	0	0	0	0	0	0	60.8925	0	0	0	0	0	0	70.499	0	36.4705	0	51.6669	0	0	0	33.1654	0	73.5193	140.581	0	0	0	78.1035	0	0	0	0	0	0	0	0	0	0	78.5726	0
PS-P(40:06)_[M+H]1+	820.549	0.875	0.6875	0.75	0.75	0.5	7.57397	2	0	0	0	0	0	0	0	0	0	0	0	0	423.528	0	0	88.6868	0	0	0	147.108	232.097	0	0	78.6848	0	0	0	123.619	273.568	0	0	0	0	0	0	68.2686	101.876	0	0	0	0
SM(32:00)_[M+H]1+	677.559	0.625	0.75	0.6875	0.5	0.9375	6.82692	3	0	0	0	0	99.0927	0	0	263.875	0	113.026	209.332	88.5909	0	0	0	107.134	0	0	0	82.861	0	0	0	147.725	0	68.238	0	0	80.8392	0	0	0	0	0	86.8172	0	0	0	0	0	98.9865
SM(34:01)_[M+H]1+	703.575	0	0	0	0	0.375	5.59114	5	7523.66	8342.8	8710.33	4068.28	7939.11	10132.9	8453.09	11457.3	6720.76	6295.15	8460.37	6770.99	10863.9	6258.5	6506.78	8987.23	2169.02	155.232	259.902	1313.21	931.514	1307.94	574.274	945.238	827.478	335.826	670.908	2785.88	656.346	801.568	350.288	285.031	898.847	349.438	557.84	925.325	767.169	1098.52	151.371	1495.35	851.426
SM(34:03)	699.544	0.75	0.9375	0.875	0.5	0.875	8.27524	1	0	0	0	0	0	89.4777	0	165.54	0	0	0	0	0	96.5467	98.673	0	0	0	0	0	94.9821	0	0	0	0	0	0	0	0	0	0	0	0	0	0	0	0	0	176.666	0	0
SM(38:04)	753.591	0.6875	0.9375	1	0.9375	0.9375	7.63962	1	0	0	0	0	0	73.7092	82.3489	65.015	139.965	0	0	0	0	69.0547	0	0	0	0	0	0	0	0	0	0	0	0	72.4307	0	0	0	0	0	0	0	0	0	0	0	0	0	0
SM(42:04)	809.653	0.875	0.8125	1	0.3125	1	6.403	1	0	0	0	0	110.246	0	0	0	0	0	0	79.711	0	0	0	0	107.394	0	0	0	0	0	0	0	0	0	35.0822	110.432	0	0	0	0	0	0	0	0	0	0	0	0	0
SM(46:00)	873.778	0	0	0	0	0	8.25724	5	33916.1	37647	17443	10735.7	12866.8	18898.7	11755	17069.5	41911.7	37896.7	26251.6	11553.9	21414	11719.9	21904.9	21831.6	20944.4	8922.15	9918.66	17325.6	21517.9	18885	13202.7	9053.93	12462.1	7368.3	4609.92	12398.7	11740.8	12909.5	2286.74	5728.75	26651.5	13099	10926	10486.9	14352.8	17448.9	7042.74	19068.2	27037.1
TG(40:06)	700.552	1	0.875	0.875	0.6875	0.8125	6.57724	1	0	0	0	0	0	0	0	0	0	0	0	0	0	0	0	0	0	0	0	0	0	97.4996	0	0	0	61.4404	0	0	0	0	0	0	0	0	0	0	0	0	0	121.593	0
TG(46:04)_[M+Na]1+	793.632	0.0625	0.25	0.25	0.625	0.125	8.34585	5	63.8029	40.7169	0.852057	0	36.6655	61.0537	104.501	290.442	31.3615	7.82054	78.981	146.131	312.149	5.13867	48.7951	7.03651	0	103.035	156.554	0	126.024	160.043	19.7409	0	0.283241	172.779	58.8573	89.7915	6.85655	8.81783	0	885.349	1.69069	331.442	258.575	0	3.14572	11.5985	139.664	676.788	92.1362
TG(47:03)_[M+Na]1+	809.663	0.875	0.8125	1	0.375	0.875	7.48597	1	0	0	0	0	117.122	0	0	0	0	0	0	59.8052	0	0	0	0	167.358	0	0	0	0	0	0	0	0	0	68.7868	110.432	0	0	0	0	0	0	0	0	0	0	0	0	0
TG(48:04)_[M+Na]1+	821.663	0.75	0.8125	0.9375	0.5	0.8125	4.41034	1	0	0	0	0	0	0	0	106.973	0	0	71.9774	0	85.7385	98.9036	0	0	106.518	0	0	0	72.1155	0	0	0	0	0	0	122.093	0	0	0	0	0	0	0	0	0	0	0	0	156.993
TG(50:06)_[M+Na]1+	845.663	0.5	0.875	0.875	0.1875	0.875	8.6533	2	0	0	0	0	234.567	37.1756	0	159.408	5.62386	12.5435	0	147.875	111.443	64.2643	0	0	0	0	0	0	0	60.5326	0	65.729	0	0	0	0	0	0	0	0	0	0	0	0	0	0	0	0	0
TG(52:00)_[M+Na]1+	885.788	0	0.0625	0	0	0.1875	3.08675	5	2117.41	2648.41	1743.93	353.242	898.981	1608.24	800.537	1173.82	3399.69	2211.82	1384.01	495.152	769.006	501.954	1050.81	2819.07	793.568	100.312	664.61	854.877	539.15	1071.46	442.266	663.345	92.9782	63.9383	192.145	1613.44	191.479	298.212	250.77	0	693.129	421.922	111.447	685.798	827.643	906.963	460.242	1372.48	410.256
TG(52:02)_[M+Na]1+	881.757	0	0	0	0	0	1.79446	5	17339.2	21440.2	18340.3	10141.5	16216.9	21527.9	13511	20521.2	19983.5	19089.6	25522.1	14903.5	16228.2	15879.8	22684.5	27945.5	14430	3578.81	7442.04	14835.9	15136	16156.4	10705.9	10330.3	4929.59	4107	3952.05	22355.3	7801.22	11452.2	4331.57	5268.88	11835.8	6477.73	12775.4	15441	15318.3	14842.4	5066.11	17651.7	12525
TG(52:03)_[M+Na]1+	879.741	0	0	0	0	0.125	2.40601	5	5234.05	6603.13	4949.14	2001.85	5058.48	7879.82	2810.58	7155.4	5813.64	5335.92	8391.82	5589.63	4609.46	4895.88	7999.82	11487	3914.7	352.672	1599.51	4258.16	4282.26	5042.8	2604.52	2709.37	575.139	456.991	294.562	7057.2	1960.56	2876.64	959.402	736.637	1553.48	475.384	2999.83	4865.08	5386.14	3151.41	516.071	5655.5	1304.48
TG(52:04)_[M+Na]1+	877.726	0.0625	0.25	0.375	0	0.6875	3.86446	5	300.818	326.845	348.879	148.304	413.466	362.108	282.546	624.936	231.794	0	915.91	690.138	383.335	423.412	608.049	1778.92	92.4156	0	80.5726	326.607	528.619	323.24	181.23	71.7753	0	0	0	1176.23	80.0283	518.201	71.8782	43.8777	313.703	0	0	484.988	727.255	194.564	0	358.235	0
TG(52:04)_[M+NH4]1+	872.77	0	0	0	0	0	3.55334	5	53196.6	60272	28142.5	17410.7	21860.5	32005.6	21602.3	27015.9	68632.2	63334	44624.2	18757.2	35675.4	19199.3	36396.7	38381.1	36114.9	14514	16081.2	27979	34333.2	32254.5	22005.5	14875.9	20555.2	13817	7804.84	19582.5	20023.7	21430	4755.11	10127.4	43857	21055.1	20594.5	17122.4	24616.3	28771.5	10509.3	32945.2	41211.8
TG(52:06)_[M+NH4]1+	868.739	0.125	0.375	0.5	0.0625	0.75	4.38481	4	548.731	629.733	326.264	169.061	0	186.532	216.609	85.245	439.002	674.456	126.555	0	311.412	265.272	309.268	564.538	64.4516	0	76.0788	72.2847	214.022	363.614	71.2738	0	120.76	0	0	567.307	98.8656	0	0	74.2964	198.644	101.342	76.5152	74.4888	0	273.292	0	209.163	0
TG(53:02)_[M+Na]1+	895.773	0.4375	0.75	0.625	0.4375	0.625	6.08899	4	169.235	0	78.2217	67.9081	0	0	150.553	0	141.553	0	91.031	77.8445	0	0	195.777	238.815	0	0	0	0	162.593	0	0	0	0	0	0	158.804	52.2681	0	83.4272	0	188.422	0	71.8886	0	0	0	0	82.9417	0
TG(53:06)_[M+NH4]1+	882.755	0	0	0	0	0	4.59641	5	9584.43	12155.7	10215.7	5272.83	8905.44	11400.9	8715.1	10567	11386.5	10289	14607.1	8793.01	10122	9773.95	11914	17279.6	7867.97	1478.82	3590.42	7789.51	7195.21	8431.94	5828.05	5717.25	2973.86	1913.19	1442.48	12701.9	4697.93	6942.18	1443.37	1489.88	7060.45	2399.74	7037.88	9009.89	8817.75	8548.25	1775.72	10089.2	6249.64
TG(53:07)_[M+NH4]1+	880.739	0	0.0625	0	0	0.125	4.5844	5	1544.39	1549.82	2664.5	1122	1729.02	2845.7	1142.15	2955.83	1447.02	1648.69	4904.32	2181.86	1775.47	1473.7	3031.41	5368.31	1677.73	200.505	400.443	2501.2	1947.88	1883.7	588.728	637.591	103.733	215.056	227.268	3856.5	530.358	666.431	80.4862	0	624.646	208.058	1132.28	2386.36	2255.82	1275.61	107.503	2133.22	690.994
TG(53:08)_[M+NH4]1+	878.723	0.3125	0.5	0.5	0.25	0.8125	5.05755	4	0	0	59.4839	0	129	223.2	0	0	141.815	221.382	111.843	254.979	100.739	221.96	115.816	750.608	208.201	0	0	83.1322	186.78	89.4858	82.744	0	0	0	0	79.359	68.0424	69.7745	0	0	0	0	0	0	99.2355	310.65	0	306.724	0
TG(54:03)_[M+NH4]1+	902.817	0	0	0	0	0	1.73069	5	146533	165570	79163.8	46450.9	62341.3	85681.3	57698.6	77352.9	182166	162290	116122	53767.9	97621.6	54375.3	98070.7	108305	94914.4	40049	45376.8	76090.4	87448.9	87304.9	63435.8	44885	55150.6	37299.3	23477.7	57620.7	55245.5	56547.9	15191.4	30591.1	121128	64586.5	60958.8	53661.3	68502.8	80972.2	35844.3	96789.3	125910
TG(54:04)_[M+NH4]1+	900.802	0	0	0	0	0	2.06622	5	63708.7	71380.6	32851.6	19723	26309.6	36933	23978	31415.3	78073.6	67171.2	50920.6	22986.7	39584.2	23430.3	41612.4	45568.6	38855.5	16706.6	19084.8	32935	40184.4	35322.6	27429.6	18368.2	24123.1	15372.3	9724.84	25712.6	22458.4	25131.4	6018.59	12295.2	49778	26376	24013.2	22170.4	27388.8	34024	14024.5	39027.8	51839.6
TG(54:05)_[M+NH4]1+	898.786	0	0	0	0	0	2.98356	5	24651.2	26166.6	12944.6	7173.39	9752.03	14569.8	9282.5	13178.6	31733.3	30509.9	20602.1	8425.84	17836.4	8632.11	15840.8	18371	15931.5	4996.79	5938.16	12872.8	15175.7	14127.6	9490.33	7379.5	9660.44	5492.14	2512.69	8626.09	8760.87	9125.66	1508.85	3395.08	19730.9	9203.77	8505.07	8456.31	10016.7	12392.2	4064.63	15617	19707.8
TG(54:06)_[M+NH4]1+	896.77	0	0.0625	0	0	0.1875	2.04081	5	4712.05	6585.79	1392.8	479.441	964.361	2453.85	1416.22	1087	7283.53	5771.56	4149.86	623.245	2747.5	608.911	2546.83	3096.74	2838.9	488.981	540.402	2194.14	3049.19	2420.14	1399.82	568.794	968.656	393.702	99.5245	1567.06	782.286	1108.7	0	95.3705	4243.84	736.762	748.18	667.853	1275.54	1118.21	431.789	2118.79	3765.56
TG(55:00)_[M+Na]1+	927.835	0.0625	0.3125	0.375	0.3125	0.5	7.96069	5	365.292	528.723	158.477	28.8356	42.9167	306.6	36.9317	70.0009	2184.44	265.364	228.365	87.5221	93.8857	0	361.98	382.939	181.302	102.139	0	120.116	136.699	338.87	128.569	0	19.0091	0	0	123.922	312.77	88.5115	0	66.4163	119.021	0	40.35	0	42.8676	215.685	29.4521	56.5774	86.1816
TG(55:01)_[M+NH4]1+	920.864	0	0.0625	0	0	0	1.37503	5	7293.78	11226.6	2673.58	1682.21	2435.52	3367.08	1661.25	3911.06	10101.5	9198.88	6972.06	2090.57	4225.73	2095.06	4862.6	5590.95	4180.52	1655.78	2154.79	3287.74	5856.41	4539.04	2483.75	1162.9	2193.24	858.568	177.051	2779.96	1928.32	2444.65	0	782.695	6640.35	3392.87	3444.09	1150.64	2509.89	3946.17	898.653	5673.69	6565.37
TG(55:02)_[M+NH4]1+	918.848	0	0.0625	0	0.0625	0.1875	1.24068	5	4739.16	5265.69	1788.24	1235.2	1446.02	2037.12	970.159	2299.93	4992.96	4381.29	3941.62	675.794	2642.3	586.236	2177.86	3672.94	2699.42	809.134	927.322	1691.25	3105.95	3020.56	1389.81	461.312	684.983	439.001	79.9005	851.383	571.727	1599.43	0	413.25	3928.11	1849.14	1091.92	825.672	2001.57	2782.07	427.096	2440.81	4668.71
TG(55:03)_[M+NH4]1+	916.833	0	0.3125	0	0.125	0.375	3.75634	5	548.545	1414.23	707.485	193.352	492.797	1063.3	196.659	980.671	1673.9	1627.46	1387.26	144.392	466.082	256.478	1097.36	469.512	559.45	0	163.443	542.79	480.682	410.376	271.168	0	0	67.8416	0	181.398	169.215	196.937	0	73.8453	1188.49	106.539	202.032	398.892	444.731	274.385	67.266	1511.51	1255.1
TG(55:04)_[M+NH4]1+	914.817	0.375	0.6875	0.75	0.5625	0.75	5.03538	3	248.047	135.928	101.178	0	0	138.156	109.302	0	0	369.881	207.066	0	92.8245	0	116.843	101.037	96.7027	148.616	0	0	144.168	0	0	0	0	128.127	0	0	0	0	0	89.928	0	106.632	71.7968	0	0	0	0	0	486.928
TG(55:05)_[M+NH4]1+	912.802	0.375	0.8125	0.375	0.3125	0.625	4.76555	4	0	0	0	0	76.7889	148.28	83.4441	75.8329	123.674	201.929	306.004	0	0	161.55	187.798	134.09	0	0	71.19	70.3553	0	0	0	0	0	69.109	0	0	0	0	0	0	86.8213	0	230.898	135.329	0	0	0	79.5886	195.293
TG(55:06)_[M+Na]1+	915.741	0.875	0.9375	1	0.625	1	5.73726	1	0	0	0	0	102.931	0	0	0	0	0	0	0	0	0	0	87.0403	0	87.2387	0	0	0	0	0	0	0	0	0	0	0	0	0	0	0	0	0	0	0	0	0	0	0
TG(55:10)_[M+Na]1+	907.679	1	0.8125	0.9375	0	0.9375	4.69425	1	0	0	0	0	0	0	0	0	0	0	0	0	0	0	0	0	0	75.9331	0	0	0	0	54.1028	80.1391	0	0	0	0	0	0	0	0	0	0	0	0	0	0	0	477.49	0
TG(55:11)_[M+NH4]1+	900.708	0.6875	1	0.9375	0.9375	0.9375	7.93027	1	0	0	0	0	0	0	60.7528	48.9997	0	0	0	0	2.48478	0	1.21273	72.1165	0	0	0	0	0	0	0	0	0	0	0	0	0	0	0	0	0	0	0	0	0	0	51.7861	0	0
TG(56:03)_[M+NH4]1+	930.848	0	0	0	0	0.1875	3.68509	5	3275	5463.18	1288.32	396.727	1064.63	897.381	596.284	1535.34	4949.93	2658.31	2718.69	651.14	1681.99	673.252	1190.9	2364.46	1603.76	167.746	508.514	2234.33	1520.89	1305.58	964.846	790.036	559.797	703.74	175.07	782.591	700.191	608.666	143.851	399.448	2730.52	956.344	628.208	906.854	1276.12	1415.08	247.901	1776.76	1879.16
TG(56:04)_[M+NH4]1+	928.833	0.125	0.3125	0.0625	0	0.5	2.41567	5	1344.35	1439.3	0	116.983	0	333.007	96.5632	354.869	1709.21	663.559	707.935	453.801	328.158	191.508	563.729	656.593	368.348	82.3302	137.766	577.828	548.487	906.1	598.138	0	199.502	77.7961	0	0	290.106	226.417	0	0	726.088	122.783	307.995	90.0726	83.7263	316.657	0	575.063	900.705
TG(56:05)_[M+NH4]1+	926.817	0	0.0625	0	0.25	0.25	2.94527	5	1874.05	3864.99	402.883	231.784	415.622	681.72	394.838	594.337	3913.18	2071.64	1902.19	210.555	355.656	471.957	548.064	1719.39	698.046	519.768	488.172	1713.12	1405.43	1016.44	654.462	123.318	359.674	242.604	146.231	548.6	632.542	557.882	68.7821	0	1856.45	748.426	260.12	207.329	638.054	397.322	82.1999	1594.4	1959.92
TG(56:07)_[M+NH4]1+	922.786	0.625	0.8125	0.8125	0.75	1	3.78684	1	0	175	0	0	0	426.225	0	183.392	156.112	180.902	0	0	0	0	0	111.647	164.326	0	0	353.319	180.967	0	0	0	0	0	0	0	0	0	0	0	0	0	0	0	0	69.9949	0	0	208.414
TG(57:02)_[M+NH4]1+	946.88	0.0625	0.0625	0	0.375	0.5625	3.77471	5	882.136	2294.31	594.894	190.584	441.4	315.161	241.594	740.947	3122	1311.03	1529.89	0	514.759	531.513	1039.75	1392.13	818.594	81.7357	325.438	1122.03	1184.73	565.547	897.831	342.537	0	94.9803	78.8003	455.491	158.133	361.505	147.13	75.162	1053.02	380.352	415.714	477.791	222.891	1032.97	86.3113	897.842	1445.5
TG(58:02)_[M+NH4]1+	960.895	0	0	0	0	0	3.05184	5	1378.62	2509.49	1255.7	507.855	383.413	2102.78	725.673	3518.69	1117.59	1100.52	3110.59	396.037	2211.95	1423.6	1707.49	3366.2	859.538	283.567	433.019	1869.08	2961.55	2860.4	924.711	1702.27	692.476	397.747	288.829	1057.63	976.978	2047.97	238.885	855.371	1090.09	991.994	1143.3	758.949	1454.4	2469.39	147.948	1100.37	1961.48
TG(58:03)_[M+NH4]1+	958.88	0.375	0.25	0.375	0.25	0.75	2.74696	4	263.474	458.78	0	0	0	83.8631	0	212.11	0	131.12	147.46	127.34	0	160.191	110.174	408.866	123.751	89.078	0	207.899	366.678	98.2932	82.4789	86.5553	0	59.2626	0	0	74.1457	88.4802	59.7524	63.8421	105.096	0	208.595	134.033	89.1116	415.742	0	107.094	104.383
TG(59:07)_[M+NH4]1+	964.833	0.75	0.875	1	0.3125	0.8125	5.02678	1	0	0	0	42.982	86.4971	0	0	3.08577	0	0	0	0	0	0	0	76.6369	169.523	0	0	0	0	0	0	0	0	0	0	3.76042	0	0	0	0	0	0	0	0	0	0	0	0	0
TG(59:08)_[M+NH4]1+	962.817	0.875	0.875	1	0.625	0.9375	6.14782	1	0	0	0	0	0	0	0	0	0	0	0	46.8178	0	97.964	0	0	0	0	75.638	0	0	0	75.4595	0	0	0	0	0	0	0	0	0	0	0	0	0	0	0	0	0	0
TG(60:02)_[M+NH4]1+	988.927	0.875	0.75	0.4375	0.625	0.625	3.84644	3	112.403	0	0	0	0	0	0	0	137.819	0	0	0	0	0	0	0	92.0846	0	0	0	0	151.648	0	0	0	0	0	91.1416	0	91.1458	0	0	0	0	166.157	68.1418	209.821	122.678	67.5261	0	203.972
TG(60:14)_[M+Na]1+	969.694	0.875	0.9375	1	0.625	1	6.50262	1	0	0	0	0	0	0	74.1656	0	0	0	0	96.1562	0	0	0	0	0	0	0	0	0	0	0	42.8435	0	0	0	0	0	0	0	0	0	0	0	0	0	0	0	0	0
TG(61:07)_[M+NH4]1+	992.864	0.6875	0.5625	0.4375	0	0.875	8.40705	4	0	0	0	0	0	0	0	106.363	0	0	8.5857	5.19799	0	67.6754	0	47.9654	0	0	0	81.3459	64.7999	1.21718	0	5.02618	0	0	0	11.6186	0	0	91.4632	404.909	0	0	0	68.3146	0.473962	3.4986	4.09475	5.16428	0
TG(61:08)_[M+NH4]1+	990.848	0.9375	0.875	0.9375	0.625	0.875	5.64255	1	0	0	0	0	0	0	0	0	0	0	0	0	68.4398	0	0	0	0	0	0	0	0	0	0	0	0	53.9674	0	0	0	0	0	75.7443	0	0	55.6343	0	0	0	0	0	0
TG(63:08)_[M+NH4]1+	1018.88	0.875	0.8125	0.75	0.5625	1	5.99654	1	0	0	0	0	0	0	0	1.87785	0	0	0	74.088	0	0	0	0	0	0	0	63.072	0	0	31.2715	0.0418694	0	0	0	0	0	0	0	0	0	62.8854	0	0	0	0	0	90.8355	0
TG(64:15)_[M+Na]1+	1023.74	1	1	0.9375	0	0.875	8.79594	1	0	0	0	0	0	0	0	0	0	0	0	0	0	0	0	0	0	0	0	0	0	0	0	0	0	0	0	0	0	0	0	0	0	0	0	0	0	0	0	0	0
[truncated: 46 more columns]

## Sheet: -ve
DMS solvent test (-ve ionisation mode)
								Total signal	112063	174260	145482	107061	129454	182212	139980	213170	152565	158887	187565	165432	155515	116455	183214	216647	62539.3	1331.84	76988.2	154006	200651	169073	99395.7	93071.7	37330.3	47013	28335.7	111946	69785.7	110564	54963.2	55496.2	59510.9	52494.2	63310.4	80989.5	73427.2	99076	46553.7	114876	70881.2
								0s/samples	148	141	182	117	201	157	156	122	135	130	152	141	169	191	121	139	163	270	156	117	105	131	124	168	188	110	175	151	146	134	204	155	155	151	166	178	194	91	105	106	133
		0s						Expt	DMT_AQ_01_Box2	DMT_AQ_02_Box2	DMT_AQ_03_Box2	DMT_AQ_04_Box2	DMT_AQ_05_Box2	DMT_AQ_06_Box2	DMT_AQ_07_Box2	DMT_AQ_08_Box2	DMT_AQ_09_Box2	DMT_AQ_10_Box2	DMT_AQ_11_Box2	DMT_AQ_12_Box2	DMT_AQ_13_Box2	DMT_AQ_14_Box2	DMT_AQ_15_Box2	DMT_AQ_16_Box2	DT_AQ_01_Box2	DT_AQ_02_Box2	DT_AQ_03_Box2	DT_AQ_04_Box2	DT_AQ_05_Box2	DT_AQ_06_Box2	DT_AQ_07_Box2	DT_AQ_08_Box2	DT_AQ_09_Box2	DT_AQ_10_Box2	DT_AQ_11_Box2	DT_AQ_12_Box2	DT_AQ_13_Box2	DT_AQ_14_Box2	DT_AQ_15_Box2	DT_AQ_16_Box2	TBME_AQ_01_Box2	TBME_AQ_02_Box2	TBME_AQ_03_Box2	TBME_AQ_04_Box2	TBME_AQ_05_Box2	TBME_AQ_06_Box2	TBME_AQ_07_Box2	TBME_AQ_08_Box2	TBME_AQ_09_Box2
Lipid variable	m/z	DMT_AQ	DT_AQ	TBME_AQ	XMI_dry	XT_AQ	Deviations	0s	Furse_Ex049_A02_DMT_AQ_01_Box2.mzXML	Furse_Ex049_B02_DMT_AQ_02_Box2.mzXML	Furse_Ex049_C02_DMT_AQ_03_Box2.mzXML	Furse_Ex049_D02_DMT_AQ_04_Box2.mzXML	Furse_Ex049_E02_DMT_AQ_05_Box2.mzXML	Furse_Ex049_F02_DMT_AQ_06_Box2.mzXML	Furse_Ex049_G02_DMT_AQ_07_Box2.mzXML	Furse_Ex049_H02_DMT_AQ_08_Box2.mzXML	Furse_Ex049_A03_DMT_AQ_09_Box2.mzXML	Furse_Ex049_B03_DMT_AQ_10_Box2.mzXML	Furse_Ex049_C03_DMT_AQ_11_Box2.mzXML	Furse_Ex049_D03_DMT_AQ_12_Box2.mzXML	Furse_Ex049_E03_DMT_AQ_13_Box2.mzXML	Furse_Ex049_F03_DMT_AQ_14_Box2.mzXML	Furse_Ex049_G03_DMT_AQ_15_Box2.mzXML	Furse_Ex049_H03_DMT_AQ_16_Box2.mzXML	Furse_Ex049_A06_DT_AQ_01_Box2.mzXML	Furse_Ex049_B06_DT_AQ_02_Box2.mzXML	Furse_Ex049_C06_DT_AQ_03_Box2.mzXML	Furse_Ex049_D06_DT_AQ_04_Box2.mzXML	Furse_Ex049_E06_DT_AQ_05_Box2.mzXML	Furse_Ex049_F06_DT_AQ_06_Box2.mzXML	Furse_Ex049_G06_DT_AQ_07_Box2.mzXML	Furse_Ex049_H06_DT_AQ_08_Box2.mzXML	Furse_Ex049_A07_DT_AQ_09_Box2.mzXML	Furse_Ex049_B07_DT_AQ_10_Box2.mzXML	Furse_Ex049_C07_DT_AQ_11_Box2.mzXML	Furse_Ex049_D07_DT_AQ_12_Box2.mzXML	Furse_Ex049_E07_DT_AQ_13_Box2.mzXML	Furse_Ex049_F07_DT_AQ_14_Box2.mzXML	Furse_Ex049_G07_DT_AQ_15_Box2.mzXML	Furse_Ex049_H07_DT_AQ_16_Box2.mzXML	Furse_Ex049_A04_TBME_AQ_01_Box2.mzXML	Furse_Ex049_B04_TBME_AQ_02_Box2.mzXML	Furse_Ex049_C04_TBME_AQ_03_Box2.mzXML	Furse_Ex049_D04_TBME_AQ_04_Box2.mzXML	Furse_Ex049_E04_TBME_AQ_05_Box2.mzXML	Furse_Ex049_F04_TBME_AQ_06_Box2.mzXML	Furse_Ex049_G04_TBME_AQ_07_Box2.mzXML	Furse_Ex049_H04_TBME_AQ_08_Box2.mzXML	Furse_Ex049_A05_TBME_AQ_09_Box2.mzXML
CL(63:0)_[M-H]1-	1337.94	0.8125	0.5625	0.5625	0.5625	0.625	5.58793	4	0	0	0	0	0	0	0	0	6.52368	11.7887	0	0	0	0	9.99535	0	10.4969	0	0	16.8915	30.1694	7.24044	0	8.98321	0	0	0	0	0	0	9.9986	8.84089	8.01669	0	0	0	0	0	2.29468	7.61854	0.166837
CL(65:0)_[M-H]1-	1365.97	0.6875	0.625	0.5	0.4375	0.875	3.89158	4	0	9.66129	0	0	0	8.06389	0	0	19.1614	0	8.57475	0	14.718	0	0	0	11.191	0	0	0	23.643	0	7.64419	10.6023	0	0	0	6.91523	0	4.82552	0	0	0	0	0	0	9.81792	8.00926	0	10.1802	14.0678
CL(65:1)_[M-H]1-	1363.96	0.5	0.6875	0.5	0.6875	0.8125	3.0398	4	0	8.11994	0	0	0	9.75716	7.02504	4.77908	8.27964	0	0	5.26043	9.50704	0	0	9.49592	11.3656	0	6.10855	8.83134	10.866	0	0	0	0	9.18786	0	0	0	0	0	0	18.9511	0	0	6.85524	0	23.1352	10.2524	49.2596	0
CL(65:2)_[M-H]1-	1361.94	0.1875	0.5	0.4375	0.5	0.8125	3.32286	4	18.5927	7.1259	0	7.24096	0	29.1025	0.348003	18.4242	10.4702	0.283854	6.56265	7.9082	9.41643	0	42.7007	7.73148	0	0	0	38.481	35.9964	33.8158	17.9939	10.817	0	9.21243	0	0	17.1083	8.80571	0	0	9.36308	16.2127	9.78556	0	0	30.5667	0	11.9122	11.4919
CL(67:0)_[M-H]1-	1394	0.6875	0.625	0.5625	0.6875	0.9375	3.30829	4	0	0	0	0	10.6704	7.64144	0	17.6559	0	6.06106	0	0	0	0	10.7766	0	9.49593	0	0	17.4683	15.5163	12.2127	0	0	0	7.9308	0	10.4203	0	0	0	0	0	0	10.4195	0	0	5.00441	14.0672	0.142804	0
CL(67:1)_[M-H]1-	1391.99	0.5625	0.6875	0.5	0.8125	0.875	3.33075	3	9.79594	5.64518	0	13.8711	0	0	0	0	13.0234	0	7.62222	9.23984	0	0	22.4667	0	0	0	0	18.0141	0	31.7241	25.5758	0	0	0	0	10.2111	7.29453	0	0	0	0	0	0	0	0	7.59083	6.81489	21.6913	7.97233
CL(67:2)_[M-H]1-	1389.97	0.3125	0.5	0.4375	0.3125	0.875	3.26197	4	8.33517	9.80099	0	6.18192	0	0	9.19908	17.0537	9.61825	10.3171	4.99307	0	0.366894	0	28.112	6.82151	0	0	0	19.0902	40.9078	19.0464	7.93133	8.29976	0	18.1355	0	16.6854	0	6.04691	0	0	0	0	0	7.39433	0	33.674	16.7342	7.16873	0
CL(67:3)_[M-H]1-	1387.96	0.1875	0.5	0.1875	0.25	0.8125	4.16013	4	12.823	25.9202	7.04686	16.078	0	21.2839	0	24.0881	6.08169	33.0122	12.7083	13.2026	26.5485	0	45.5307	49.5985	7.63543	0	0	26.9327	85.7456	17.1349	14.2457	8.95029	0	0	0	9.24081	0	22.8529	0	0	8.88457	19.8661	7.62794	9.0269	0	45.6716	9.10731	22.4814	0
CL(68:0)_[M-H]1-	1408.03	0.6875	0.625	0.6875	0.75	1	3.2842	3	0	11.8703	0	9.22147	0	0	0	9.77038	0	3.99827	0	0	0	0	0	5.10367	0	0	0	6.49407	7.52496	0	10.6311	12.2489	0	7.62923	0	0	16.9632	0	0	0	0	0	7.16334	0	0	0.220103	0	6.80709	0
CL(68:1)_[M-H]1-	1406.01	0.625	0.75	0.5625	0.8125	1	4.50696	2	0	12.7836	10.4693	0	0	0	0	0	14.3185	7.42212	0	3.4573	8.49855	0	0	0	0	0	0	18.6684	22.195	10.0351	20.4859	0	0	0	0	0	0	0	0	0	9.8326	0	11.7729	0	3.12926	4.88426	0	0	0
CL(68:2)_[M-H]1-	1404	0.625	0.5	0.3125	0.5	0.9375	3.24825	4	0	0	0	0	0	19.8795	0	22.5222	8.02015	11.8164	15.8541	0	0	0	0	36.4547	0	0	0	34.9955	48.216	21.0048	18.2855	9.82803	0	11.8108	0	8.12511	0.15064	0	0	0	0	0	0	8.7437	0	20.8672	12.1416	24.7939	0.239825
CL(68:4)_[M-H]1-	1399.96	0.125	0.5	0.125	0.3125	0.8125	2.9741	4	25.6286	26.0693	0	8.26214	0	8.01924	10.1707	40.7374	53.9844	24.2209	9.78184	34.371	25.9907	17.1576	9.63139	17.2972	0	0	0	53.4681	154.793	72.9005	7.75444	13.0661	0	7.21963	0	0	16.1981	18.1391	0	0	3.70787	0	0	7.14869	10.2191	16.7097	15.5304	28.712	28.9949
CL(69:1)_[M-H]1-	1420.02	0.625	0.6875	0.375	0.75	1	3.83546	3	10.2092	0	0	4.04291	0	0	0	0	11.7469	17.5086	0	6.8217	5.37637	0	0	0	0	0	0	0	15.5937	5.38255	9.03356	0	0	0	0	0	7.6115	9.31266	0	0	8.8129	0	0	0	6.74463	19.1992	0	44.5299	5.1863
CL(69:3)_[M-H]1-	1415.99	0.1875	0.5	0.25	0.1875	0.875	3.39253	4	5.28709	21.1832	0	16.0403	8.70497	10.4602	7.44072	20.5264	35.8967	17.6105	13.9368	32.7836	0	0	48.357	23.4288	0	0	0	63.8871	87.1879	40.4232	7.12164	19.7629	0	4.55242	0	8.67623	0	24.3614	0	0	0	0	10.2349	20.5923	0	26.7164	5.74558	11.9508	12.9655
CL(69:4)_[M-H]1-	1413.97	0.125	0.5	0.3125	0.125	0.9375	3.18122	4	26.6479	17.6212	21.7931	11.1702	0	9.80806	30.8537	26.115	31.7264	43.3053	15.4861	7.02943	8.83334	0	48.0385	22.6689	11.1884	0	0	50.5877	61.9197	86.4061	11.7053	5.51051	0	0	0	0	8.29252	8.84909	0	0	0	0	0	7.97726	0	13.7244	19.4502	45.2214	35.782
CL(69:5)_[M-H]1-	1411.96	0.1875	0.5625	0.375	0.375	0.875	3.69402	4	5.05753	5.47391	0	6.72248	8.8801	22.885	10.3269	9.99308	8.29379	18.3089	18.0561	23.2664	0	0	19.0752	3.01215	0	0	0	20.4486	53.6072	45.1337	0	6.43791	0	0	0	10.0244	5.29718	9.55474	0	0	0	0	0	17.8754	0	13.1575	6.50496	0	13.8963
CL(69:6)_[M-H]1-	1409.94	0.375	0.5625	0.375	0.6875	0.9375	3.27015	4	0	0	0	19.6924	9.55069	9.57757	0	13.622	0	16.174	7.3981	9.14208	8.18115	0	11.7155	5.95628	0	0	0	12.6172	19.8892	19.5971	18.3311	0	0	11.0458	0	0	5.82287	9.98779	0	0	0.127021	8.98907	0	6.05752	0	15.5926	0.356467	23.8987	15.5677
CL(70:1)_[M-H]1-	1434.04	0.5625	0.8125	0.75	0.875	0.875	3.27956	1	6.36521	0	0.562899	0	0	14.182	0	8.18205	10.7867	13.6032	0	0	0	0	9.93418	0	0	0	0	0.0705969	21.6219	0	0	0	0	0	0	0	7.31807	0	0	0	0	0	0	0	0	14.548	0	9.92613	0
CL(70:2)_[M-H]1-	1432.03	0.4375	0.6875	0.375	0.6875	0.875	5.23167	4	0	0	0	22.7321	0	13.8662	0	9.37797	19.5134	6.28063	18.7985	11.0543	21.3242	0	0	9.10579	0	0	0	20.9533	32.6049	17.767	9.09716	0	0	0	0	0	7.25456	0	0	0	0	0	11.9297	6.37992	0	26.8471	16.6904	30.7504	0.145243
CL(70:3)_[M-H]1-	1430.01	0.25	0.5625	0.3125	0.625	0.8125	4.34583	4	12.5118	32.8642	0	5.85576	0	30.5048	0	21.6767	23.7908	36.999	50.9504	17.6384	6.1882	0	58.2875	15.8554	0	0	0	75.7101	68.3124	41.7488	27.1543	0	0	0	0	28.9158	23.3621	12.7627	0	0	0	0	17.3305	34.3743	8.8688	54.0863	24.8087	35.3228	0
CL(70:4)_[M-H]1-	1428	0.25	0.5625	0.1875	0.4375	0.8125	3.55572	4	6.48658	59.3577	6.39491	6.77046	0	0	0	11.526	37.7652	40.535	12.9247	35.4372	11.2437	0	20.8042	8.94234	0	0	0	46.2499	129.663	51.476	6.77534	0	0	18.5862	0	10.5176	9.38811	0	0	0	19.8363	0	0	20.1238	9.44792	59.7868	20.1477	27.5709	0
CL(70:5)_[M-H]1-	1425.98	0.25	0.5625	0.375	0.5625	0.8125	3.36915	4	8.59287	0	0	28.0113	6.29422	0	16.2521	21.1151	25.6569	19.1595	32.9184	22.8049	10.7148	0	18.2395	8.80281	0	0	0	9.03424	102.589	29.933	23.1894	0	0	8.20739	0	20.7544	4.60979	0	0	0	0	0	0	22.1616	0	16.5777	11.0617	29.3651	9.52962
CL(70:6)_[M-H]1-	1423.96	0.375	0.6875	0.5	0.5625	0.875	3.23987	4	0	16.0338	8.9346	13.3158	0	0	8.75182	6.5501	7.93889	0	0.566096	9.0629	0	0	7.20604	6.90331	0	0	0	15.0286	38.0004	0	0	0	0	4.86572	0	0	8.36184	8.0599	0	0	0	0	7.48178	0	0	0	7.77395	14.1669	7.69278
CL(71:0)_[M-H]1-	1450.07	0.75	0.625	0.6875	0.8125	0.875	3.13995	2	0	0	0	7.19353	0	7.37817	0	0	6.40354	0.223438	0	0	0	0	0	0	0	0	0	7.54173	5.64132	7.52806	6.14665	0	0	8.63361	0	0	7.44236	0	0	0	8.2335	0	0	0	0	11.1222	4.12456	0	0
CL(71:1)_[M-H]1-	1448.05	0.5625	0.625	0.375	0.9375	0.875	3.15898	3	0	15.0285	0	0	0	0	5.94303	0	10.8649	6.40729	0	0	5.54369	0	30.8121	7.49881	0	0	0	0	33.0708	7.23526	15.2508	0	0	6.26504	0	11.5954	0.170729	0	0	0	0	0	0	7.40163	0	9.93964	8.55845	5.66151	0
CL(71:2)_[M-H]1-	1446.03	0.5625	0.6875	0.4375	0.875	0.8125	3.10998	3	12.3052	0	0	8.46644	0	0	0	9.82192	0	9.29091	0	0.315873	0	0	14.0954	8.5115	0	0	0	29.855	52.8068	26.0646	5.13712	0	0	0	0	0	0	12.2487	0	0	0	0	10.7064	0	0	4.15568	0	22.7087	11.1721
CL(71:3)_[M-H]1-	1444.02	0.25	0.6875	0.25	0.4375	0.875	3.22157	4	12.7022	0	0	8.65804	9.15791	9.04918	0	8.33192	19.2147	18.9508	0.329385	23.5045	0	8.51909	19.3765	8.09506	0	0	0	55.6884	84.1223	64.4155	0	0	0	0	0	0	7.50469	18.2357	0	0	0	0	0	42.2363	0	30.362	18.3157	36.7231	0.299075
CL(71:4)_[M-H]1-	1442	0.0625	0.5625	0.25	0.375	0.8125	3.86726	4	21.4767	17.2561	6.25034	23.4908	14.4028	15.8589	0	29.5728	19.005	17.5075	27.4511	12.7649	5.91065	21.7682	41.4321	7.6895	0	0	0	53.4123	96.6945	20.7323	28.5056	0	0	0	0	27.3563	17.1425	19.1638	0	0	0	12.4862	0	14.3952	0	33.6457	11.9277	10.5851	14.275
CL(71:5)_[M-H]1-	1439.99	0.0625	0.5	0.25	0.375	0.9375	3.19589	4	20.602	22.1867	5.80272	10.2366	0	12.7809	8.8727	37.6819	9.01126	13.6462	16.2421	23.4607	8.75108	6.57745	24.6801	7.68551	0	0	0	79.5148	61.1555	16.7103	42.371	0	0	8.99679	0	11.1174	17.3501	21.4529	0	0	0	0	0	13.19	0	37.25	11.7082	24.103	10.4232
CL(71:6)_[M-H]1-	1437.97	0.3125	0.75	0.375	0.375	0.8125	3.93665	3	6.83997	8.75754	0	28.7482	0	0	25.4418	10.2556	10.1365	10.3233	0	18.7737	0	0.0647207	0.0710527	14.5235	0	0	0	32.022	28.0818	0	0	0	0	17.5859	0	15.2977	0	0	0	0	18.6456	0	0	8.25178	0	5.30186	7.80437	15.432	8.27478
CL(71:7)_[M-H]1-	1435.96	0.4375	0.75	0.5	0.5625	0.9375	3.41236	3	0	21.2865	8.87692	6.37958	0	11.1845	18.6861	10.2039	8.97643	0	6.21887	12.0029	0	0	0	0	0	0	0	8.39052	9.50994	0	0.425599	0	0	7.65656	0	0	0	0	0	0	0	0	6.4232	0	9.12438	6.42785	12.5771	0	0
CL(71:8)_[M-H]1-	1433.94	0.4375	0.6875	0.6875	0.625	0.875	4.27996	4	12.4849	0	0	12.7491	0	0	0	11.3293	22.1847	7.82451	14.6594	0.0287495	8.74421	0	12.9956	0	7.76204	0	0	0	5.50031	11.2197	0	0	0	0	0	21.755	6.75988	0	0	0	0	0	0	0	0	19.338	4.66753	0	0
CL(72:2)_[M-H]1-	1460.06	0.4375	0.8125	0.5625	0.9375	1	3.66179	2	10.2691	0	6.99851	7.53191	0	11.3693	0	12.8835	0	16.9074	0	14.5668	0	0	13.2354	8.73878	0	0	0	7.3858	35.9292	0	0	0	0	0	0	0	6.09379	0	0	0	0	0	0	0	0	6.56737	0	23.6151	6.5919
CL(72:3)_[M-H]1-	1458.04	0.25	0.625	0.3125	0.5625	0.9375	4.92955	4	26.0801	17.0294	8.28864	16.53	0	0	0	6.77473	16.97	22.5283	34.2993	26.9269	6.80634	0	32.8468	21.529	0	0	0	30.4749	64.6865	48.0886	34.6111	0	0	8.01849	0	0	8.08101	0	0	0	0	0	0	5.24554	0	42.1922	7.66947	22.578	11.9511
CL(72:5)_[M-H]1-	1454.01	0.25	0.625	0.1875	0.625	1	3.16702	4	10.4626	11.566	0	14.014	0	28.5239	0	22.5417	25.5461	41.2102	5.18487	6.98378	5.33092	0	52.5506	8.19914	0	0	0	70.9759	76.8068	51.3523	25.0779	0	0	7.67104	0	0	10.487	0	0	0	22.2178	0	0	5.59932	8.70841	17.4641	22.0706	30.6978	38.2695
CL(72:6)_[M-H]1-	1452	0.3125	0.625	0.5625	0.5625	0.9375	3.61836	4	10.1655	0.231881	0	16.4898	0	5.69621	0	18.9197	16.4112	23.9153	7.01913	7.33727	0	0	15.1693	8.24021	9.97987	0	0	18.4552	18.3959	0	15.7582	0	0	8.64423	0	0	7.49822	0	0	0	0	0	0	4.0218	0	0	14.6254	0	0
CL(72:8)_[M-H]1-	1447.96	0.375	0.6875	0.4375	0.75	0.9375	2.77053	3	25.6869	0	0	13.6963	0	10.6056	0	7.78537	5.90523	31.1727	23.3051	7.09729	0	0	16.3761	5.14934	0	0	0	8.52777	10.6598	0	0	0	0	8.18274	0	7.56757	7.49253	0	0	0	0	0	0	4.68625	0	3.98625	8.59294	5.897	0
CL(73:1)_[M-H]1-	1476.08	0.5625	0.875	0.5	0.875	1	3.99425	2	0	0	0	0	0	0	0	11.6965	8.67969	10.1634	6.09531	8.49387	5.39055	0	19.5441	0	0	0	0	9.20814	14.2081	0	0	0	0	0	0	0	0	0	0	0	0	0	0	12.4254	0	7.81469	10.9306	0	0
CL(73:2)_[M-H]1-	1474.07	0.6875	0.8125	0.75	0.875	0.9375	3.34314	1	0	0	0	0	0	0	10.8693	5.88344	0	7.96764	0	13.9323	0	0	0	9.77048	0	0	0	21.5642	12.383	0	8.9063	0	0	0	0	0	0	0	0	0	0	0	0	0	0	15.7549	0	11.123	0
CL(73:3)_[M-H]1-	1472.05	0.375	0.75	0.4375	0.875	0.875	3.51602	2	6.87264	13.2619	0	9.92497	0	0	4.9519	0.484295	19.7802	27.5871	0	25.4066	0	0	48.8521	11.115	0	0	0	32.0145	42.4665	13.9759	23.26	0	0	0	0	0	0	0	0	0	10.7235	0	0	9.09882	8.14636	17.3276	16.4901	0	0
CL(73:4)_[M-H]1-	1470.03	0.3125	0.75	0.5	0.6875	0.875	3.59335	3	4.69615	0.0237903	0	20.259	0	0	0	25.7925	42.7194	20.137	17.7577	9.35241	11.141	0	33.2835	18.4819	0	0	0	63.2051	96.4084	31.0787	25.4788	0	0	0	0	0	0	0	0	0	0	0	0	0	0	36.7586	9.22883	12.2	0
CL(73:5)_[M-H]1-	1468.02	0.125	0.75	0.375	0.5625	0.875	3.16916	3	18.7834	22.2123	0.369722	9.60154	0	5.69241	11.6346	7.62845	31.0934	30.1877	17.2555	16.0063	8.41234	0	28.7835	8.68932	0	0	0	20.4278	80.3692	30.5283	6.42852	0	0	0	0	0	0	0	0	0	0	0	0	15.0238	0	34.6633	11.3268	10.4303	6.95613
CL(73:6)_[M-H]1-	1466	0.375	0.625	0.4375	0.875	0.875	3.58306	3	0.123018	12.0115	9.64349	12.0154	0	0	0	5.08651	15.5676	13.3827	8.39475	17.4174	0	0	27.6551	0	0	0	0	34.4283	61.2024	9.29907	4.48252	0	0	5.66217	0	0	11.0359	0	0	0	0	0	0	7.65748	0	33.5412	8.39325	30.7822	0
CL(73:7)_[M-H]1-	1463.99	0.3125	0.75	0.5625	0.625	0.9375	3.70782	3	8.7538	0	0	16.5122	0	5.86738	0	8.78788	19.8184	7.19796	0.40815	14.3004	10.7491	0	18.2212	17.2816	0	0	0	10.1884	20.4289	14.7479	0.296425	0	0	0	0	0	0	0	0	0	9.08827	0	0	0	0	12.5568	5.90941	7.8111	0
CL(73:8)_[M-H]1-	1461.97	0.6875	0.8125	0.5625	0.75	0.9375	4.93713	2	0	18.8955	0	13.2647	0	0	10.3895	0	0	0	0	10.1022	0	0	0	6.17178	0	0	0	31.4433	16.6629	0	0	0	0	7.55165	0	0	0	0	0	0	0	0	0	13.6537	0	9.62801	0	0	18.2591
CL(73:9)_[M-H]1-	1459.96	0.5	0.9375	0.5625	0.75	0.8125	2.97881	2	0.141385	5.44133	8.06062	0.219345	0	9.00547	0	0	0	7.97301	16.3344	0	0	0	16.7419	0	0	0	0	0	16.0903	0	0	0	0	0	0	0	0	0	0	0	0	0	0	0	0	0.906224	10.6775	0	0.641607
CL(74:02)_[M]2-	744.549	0	0	0	0	0	6.24637	5	2464.71	2907.74	3097.98	2833.19	3239.93	3241.09	3165.49	4726.81	2559.25	2658.48	2968.09	3214.16	3223.18	2667.12	2970.87	3936.71	648.321	21.7608	577.159	989.615	1239.08	1055.03	786.68	866.708	571.607	425.396	592.328	606.821	1045.03	616.003	990.26	459.443	124.266	119.382	189.884	344.815	191.966	239.078	277	299.814	148.541
CL(74:03)_[M]2-	743.541	0	0	0	0	0	4.23144	5	2708.74	3465.99	3645.2	2833.25	3642.42	3980.75	3748.03	5477.71	3066.3	3285.72	3735.46	3537.63	3892.56	3279.51	3828.17	4591.77	852.531	20.1692	753.173	1263.97	1775.12	1498.55	1032.67	1111.61	753.087	460.882	716.834	755.64	1108.4	830.34	1104.7	630.63	157.685	139.723	246.974	445.566	495.431	702.895	256.982	547.668	239.009
CL(74:05)_[M]2-	741.525	0	0	0	0	0	3.85017	5	1083.93	1228.65	1407.22	1089.36	1406.76	1526.88	1431.24	2124.26	1163.5	1200.92	1444.71	1401.26	1482.24	1265.32	1458.15	1976.81	279.567	10.7524	185.566	428.836	631.426	437.634	315.174	340.098	207.916	109.668	114.758	220.989	335.545	257	339.276	132.443	60.2647	65.9099	106.295	269.874	103.508	33.3367	35.6216	104.665	37.044
CL(74:06)_[M]2-	740.517	0	0	0	0	0	7.62668	5	2526.16	2911	3200.63	2417.64	3181.27	3304.89	3114.05	4812.67	2715.66	2908.69	3153.55	3128.85	3381.48	2708.06	3206.83	4003.57	685.458	8.53065	472.819	1045.77	1477.72	1101.3	789.341	915.083	554.98	341.938	526.585	651.875	853.257	577.557	910.542	377.859	120.972	115.627	190.759	345.598	218.361	289.835	264.013	396.707	252.989
CL(74:10)_[M-H]1-	1471.96	0.5625	0.875	0.625	0.875	0.875	4.79121	2	0	0	10.2639	6.32425	0	9.04522	4.72867	16.9549	0	0	0	7.3541	0	0	8.27983	0	0	0	0	29.2808	12.1525	0	0	0	0	0	0	0	0	0	0	0	0	0	0	3.78344	0	7.37456	0	4.59686	6.23898
CL(74:2)_[M-H]1-	1488.09	0.875	0.75	0.625	0.9375	1	3.497	1	5.68526	0	0	0	0	0	0	0	0	0	0	0	0	0	0	6.27471	0	0	0	10.924	8.31757	16.7377	0	0	0	9.5086	0	0	0	0	0	0	0	0	0	0	0	6.90875	7.90843	6.42408	0
CL(74:3)_[M-H]1-	1486.07	0.375	0.8125	0.375	0.8125	0.9375	3.33686	2	8.42595	18.7816	0	9.19606	0	8.35536	9.51685	5.26197	0	0	7.1564	17.3096	0	0	34.7523	8.90007	0	0	0	18.2088	26.0463	0	0	0	0	15.4963	0	0	0	0	0	0	0	0	0	9.0538	0	9.92943	11.7157	16.3017	0
CL(74:4)_[M-H]1-	1484.06	0.5	0.75	0.3125	0.8125	0.9375	3.37118	2	0	18.4062	0	10.8373	0	7.65684	0	8.83259	0	16.9922	0	5.07434	0	0	15.5753	11.5167	0	0	0	53.5266	43.3122	36.0193	22.9473	0	0	0	0	0	0	0	0	0	10.1652	0	0	6.67483	0	34.3014	27.3136	35.5049	0
CL(74:5)_[M-H]1-	1482.04	0.4375	0.6875	0.375	0.8125	0.9375	5.0895	3	0	0	0	14.1179	0	17.9418	0	9.48632	8.33527	27.0246	17.7072	17.9286	0	0	40.8238	13.9912	0	0	0	38.2309	55.7131	43.9301	21.0143	0	0	8.62131	0	0	0	0	0	0	9.51522	0	0	0	0	37.9839	5.68198	15.8956	0
CL(74:7)_[M-H]1-	1478.01	0.3125	0.6875	0.625	0.8125	0.875	3.3942	3	18.4373	0	0	21.7618	0	9.20358	7.5745	15.921	9.69379	47.4212	15.1247	0	6.10525	0	19.9853	15.752	0	0	0	14.9996	12.3546	13.9003	5.66998	0	0	9.48345	0	0	0	0	0	0	8.10081	0	0	0	0	16.2607	8.38675	0	0
CL(74:8)_[M-H]1-	1476	0.5	0.8125	0.6875	0.8125	0.9375	3.02912	2	32.8316	19.0167	0	20.5477	0	0	22.4518	0	23.8667	29.4449	0	9.90505	0	0	16.8897	0	0	0	0	41.2175	16.9151	9.72839	0	0	0	0	0	0	0	0	0	0	0	0	0	0	0	7.84687	0	13.3788	0
CL(74:9)_[M-H]1-	1473.98	0.5	0.9375	0.5625	0.75	0.875	3.12419	2	0	0	0	8.99843	0	9.5844	16.2941	11.0209	15.8992	0	4.45068	12.4945	0	0	8.19086	0	0	0	0	8.717	0	0	0	0	0	0	0	0	0	0	0	0	0	0	0	0	11.0266	6.80458	12.9361	12.6551	0
CL(75:11)_[M-H]1-	1483.96	0.5625	0.75	0.625	0.6875	1	2.63774	3	0	0	0	8.32965	0	0	0	0.253532	15.5711	6.73344	0	0.227245	0	8.97748	0.00224561	0	0	0	0	10.2209	20.72	5.14334	0	0	0	9.2828	0	0	0	0	0	0	0	0	0	9.56207	0	0	0	12.2364	0
CL(75:12)_[M-H]1-	1481.94	0.5625	0.875	0.5	0.6875	0.875	4.22935	3	15.1791	4.21435	0	7.35702	0	0	11.1819	0	5.68063	7.50412	0	7.98084	0	0	0	0	0	0	0	0	48.1468	15.4848	0	0	0	0	0	0	0	0	0	0	0	0	0	9.42804	0	0	14.891	20.5433	0
CL(75:3)_[M-H]1-	1500.08	0.5625	0.8125	0.5625	0.9375	0.9375	3.0752	2	0	9.32227	0	5.84787	0	0	9.28593	7.43046	0	7.48183	7.4879	0	0	0	13.7602	0	0	0	0	16.1797	19.167	44.0251	0	0	0	0	0	0	0	0	0	0	0	0	0	0	0	0	3.40264	9.84342	0
CL(75:4)_[M-H]1-	1498.07	0.5	0.75	0.5	0.875	0.9375	3.39979	2	16.781	21.2327	0	13.3343	0	0	0	14.2066	5.0964	3.6184	13.9029	0	0	0	39.773	0	0	0	0	19.3025	63.2236	0.135235	17.4102	0	0	0	0	0	0	0	0	0	0	0	0	2.61948	0	7.02413	23.4074	0	0
CL(75:5)_[M-H]1-	1496.05	0.375	0.75	0.5	0.6875	0.9375	4.22527	3	6.57801	24.5376	0	20.9289	0	6.73185	0	27.252	0	12.4617	19.8843	26.9701	0	0	26.4935	15.9563	0	0	0	12.5001	63.6081	23.3009	25.9774	0	0	0	0	0	0	0	0	0	0	0	0	0	0	22.6414	4.75766	6.5359	5.77821
CL(75:6)_[M-H]1-	1494.03	0.5	0.6875	0.5	0.75	1	3.70439	3	0.0197237	20.1255	0	19.4465	0	0	0	26.4337	0	9.29827	0	8.68186	0	0	21.8056	10.6758	0	0	0	33.109	51.1635	10.3591	19.4738	0	0	0.201925	0	0	0	0	0	0	0	0	0	0	0	14.8377	5.68522	0	0
CL(75:7)_[M-H]1-	1492.02	0.75	0.6875	0.625	0.75	0.9375	3.25286	2	24.0753	0	0	0	0	0	0	0	21.1958	19.3643	0	21.0656	0	0	0	0	0	0	0	13.8743	29.0572	7.06252	17.8544	0	0	8.50208	0	0	0	0	0	0	0	0	0	0	0	9.80643	0	0	11.4531
CL(75:8)_[M-H]1-	1490	0.5625	0.875	0.5625	0.875	0.875	3.14729	2	17.0097	6.55792	0	0	0	0	0	0	13.2463	7.79611	17.2253	0	0	0	8.63656	9.02466	0	0	0	29.264	0.37143	0	0	0	0	0	0	0	0	0	0	0	0	0	0	9.49723	0	6.26904	9.83252	17.9212	0
CL(75:9)_[M-H]1-	1487.99	0.4375	0.75	0.5625	0.875	0.875	3.2946	2	21.7383	0	0	6.00783	0	6.20765	0	14.4648	14.3719	8.87811	7.74586	24.2989	0	0	0	8.77509	0	0	0	13.1167	22.7619	19.1852	12.117	0	0	0	0	0	0	0	0	0	0	0	0	12.0057	0	6.32377	0	9.67615	0.281684
CL(76:10)_[M-H]1-	1500	0.3125	0.875	0.8125	0.875	0.9375	3.34409	1	14.7036	7.17052	5.81654	6.79595	0	9.20418	0	20.0305	8.052	6.77182	5.62934	0	0	8.02747	9.29178	0	0	0	0	0	12.5773	0	0	0	0	5.1888	0	0	0	0	0	0	0	0	0	0	0	4.29011	0	0	8.2887
CL(76:11)_[M-H]1-	1497.98	0.375	0.75	0.5	0.9375	0.9375	2.45158	2	4.30252	14.7461	0	5.21388	0	0	7.45599	0.202199	7.54819	16.7019	7.4835	4.18826	0	0	8.21554	0	0	0	0	0.256598	18.9129	17.9805	5.92772	0	0	0	0	0	0	0	0	0	0	0	0	20.383	0	2.47455	3.91252	0	0.293326
CL(76:12)_[M-H]1-	1495.96	0.5	0.75	0.4375	0.8125	0.9375	4.45574	2	0	8.15251	0	7.58449	0	0	0	0	14.2837	5.1105	15.7526	14.2926	0	0	5.05632	7.10741	0	0	0	6.87792	23.6763	10.2071	11.7025	0	0	0	0	0	0	0	0	0	0	0	0	14.615	0	7.84739	0	10.8191	0.387522
CL(76:5)_[M-H]1-	1510.07	0.4375	0.875	0.6875	1	0.9375	3.3514	2	24.406	16.3696	0	12.1942	0	0	0	16.1985	7.65373	6.74926	0	14.8663	0	0	10.062	14.8798	0	0	0	27.7274	42.7138	0	0	0	0	0	0	0	0	0	0	0	0	0	0	0	0	9.9504	9.59197	10.8019	0
CL(76:6)_[M-H]1-	1508.06	0.5625	0.8125	0.4375	0.875	1	3.13132	2	0	0	0	7.62762	0	0	0	6.83724	8.64067	16.2679	0	13.6252	0	0	20.4678	19.9189	0	0	0	0.163275	27.1043	11.5367	0	0	0	0	0	0	0	0	0	0	0	0	0	0	0	24.8376	10.5869	16.6057	5.32145
CL(76:7)_[M-H]1-	1506.04	0.4375	0.75	0.625	0.875	1	4.28749	2	7.72735	13.0535	0	7.10571	0	0	0	15.0387	15.0306	11.9695	7.0657	9.56404	0	0	22.3975	0	0	0	0	11.2066	16.1595	5.56495	7.0903	0	0	0	0	0	0	0	0	0	0	0	0	0	0	4.64537	6.10387	8.13024	0
CL(76:8)_[M-H]1-	1504.03	0.5	0.8125	0.6875	0.9375	1	4.21923	2	7.42228	5.00061	0	7.32781	0	0	10.7666	0	0	27.4557	11.2261	8.61987	0	0	26.9691	0	0	0	0	6.6844	39.0746	8.32729	0	0	0	0	0	0	0	0	0	0	0	0	0	0	0	0.34383	0	0	8.06653
CL(77:10)_[M-H]1-	1514	0.6875	0.9375	0.8125	0.875	0.9375	3.31474	1	0	0	0	6.0902	0	0	0	7.17675	14.5158	0	0	6.04799	0	0	0	7.82859	0	0	0	0	15.1644	0	0	0	0	0	0	0	0	0	0	0	0	0	0	9.41636	0	3.31907	0	0	0
CL(77:12)_[M-H]1-	1509.97	0.5625	0.75	0.6875	0.875	0.9375	5.7666	2	6.57098	5.42452	0	8.14718	0	0	0	0	4.63355	6.50819	0	7.44614	0	0	14.9106	0	0	0	0	8.42892	15.7465	0	0.131658	0	0	7.33836	0	0	0	0	0	0	0	0	0	0	0	2.8311	7.72282	0	0
CL(77:4)_[M-H]1-	1526.1	0.75	0.875	0.6875	0.9375	1	3.66949	1	0	0	0	6.09671	0	0	0	0	17.1093	0	6.84828	0	0	0	16.6369	0	0	0	0	12.8521	28.8769	0	0	0	0	0	0	0	0	0	0	0	0	0	0	0	0	15.3769	0	0	0
CL(77:6)_[M-H]1-	1522.07	0.4375	0.875	0.8125	0.875	0.9375	3.48524	1	20.1621	9.60662	0	7.29612	0	0	0	24.1167	4.67481	10.2151	6.62825	9.82415	0	0	21.2007	0	0	0	0	8.65855	17.5045	0	0	0	0	0	0	0	0	0	0	0	0	0	0	0	0	0	26.1481	0	0
CL(77:8)_[M-H]1-	1518.03	0.625	0.875	0.5625	0.9375	1	3.45372	2	7.80791	0	0	28.1504	0	0	0	14.416	0	15.7224	0	15.567	0	0	5.9992	0	0	0	0	8.29545	19.9746	0	0	0	0	0	0	0	0	0	0	0	0	0	0	0	0	30.2606	6.75292	12.7321	0
CL(78:04)_[M]2-	770.564	0	0.0625	0	0	0	6.30589	5	519.876	622.612	635.117	550.612	663.728	692.608	755.911	1109.63	427.462	493.98	539.544	570.747	727.6	483.359	605.018	800.619	53.0404	0	61.4458	121.7	159.875	117.738	89.7899	119.088	65.9976	59.128	82.8174	30.6048	173.44	70.7896	155.705	44.4916	25.8904	30.9602	21.7237	17.6141	32.2273	46.2077	30.4919	46.001	37.2702
CL(78:10)_[M]2-	764.517	0	0.125	0.375	0	0.4375	7.76468	5	104.007	104.997	148.934	98.3586	92.0556	154.871	154.969	344.781	100.449	130.427	178.53	80.6153	100.846	150.193	171.426	195.62	31.3333	2.26354	4.18487	11.9553	47.7997	31.8165	7.95593	16.6772	8.00612	5.4427	15.6449	0	5.87985	19.9882	9.00951	0	7.09427	6.24731	7.9754	0	0	11.4799	6.45721	10.6957	0
CL(78:10)_[M-H]1-	1528.03	0.625	0.9375	0.75	0.875	0.9375	3.33466	1	11.8354	7.39764	0	5.53876	0	0	0	7.67727	0	17.007	0	0	0	0	22.1117	0	0	0	0	29.3072	0	0	0	0	0	0	0	0	0	0	0	0	0	0	0	0	0	4.51832	0	15.9427	0
CL(78:13)_[M-H]1-	1521.98	0.625	0.875	0.5625	1	1	3.03666	2	0	8.26745	0	8.10142	0	0	0	10.0319	9.39195	6.62549	0	0	0	0	8.2859	0	0	0	0	31.2094	31.939	0	0	0	0	0	0	0	0	0	0	0	0	0	0	10.5738	0	0	16.4782	24.0032	0
CL(78:9)_[M-H]1-	1530.04	0.5625	0.9375	0.9375	1	1	3.19247	1	7.53018	0	0	25.7711	0	0	0	6.06794	0	0.137474	4.55108	0	0	0	10.2249	7.05964	0	0	0	0	27.9642	0	0	0	0	0	0	0	0	0	0	0	0	0	0	0	0	0	0	0	0
CL(79:12)_[M-H]1-	1538	0.8125	0.875	0.6875	1	1	3.32063	1	0	0	0	9.49828	0	0	0	16.401	0	11.6736	0	0	0	0	0	0	0	0	0	16.6079	13.8327	0	0	0	0	0	0	0	0	0	0	0	0	0	0	14.1318	0	5.13093	0	0	0
CL(80:16)_[M-H]1-	1543.96	0.6875	0.9375	0.875	1	1	3.15745	1	0	0	0	719.277	0	0	0	0	0	0	488.871	677.509	0	0	68.0595	945.71	0	0	0	0	15.1667	0	0	0	0	0	0	0	0	0	0	0	0	0	0	0	0	0	0	0	0
LPC_22:1_[M+Cl]1-	612.38	0.9375	0.8125	0.6875	0.9375	1	7.87456	1	0	0	0	5.0065	0	0	0	0	0	0	0	0	0	0	0	0	0	2.51942	0	0	6.30473	0	0	0	0	0	1.22508	0	0	0	0	0	0	5.17416	0	0	0	5.79994	0	0	0
LPE_16:0_[M-H]1-	452.278	0.125	0.625	0.625	0	0.5	6.97517	5	33.867	23.9093	15.2277	5.65148	22.0213	29.4484	0	18.5029	7.41816	30.4734	0	7.44123	15.8886	16.7095	30.1029	23.3336	5.54974	0	0	0	0	5.33412	6.07646	0	0	0	8.0536	0	0	6.12629	0	11.9034	0	0	4.87188	5.03972	0	0	6.9425	0	0
LPE_18:1_[M-H]1-	478.294	0	0.4375	0	0	0.625	2.76373	5	251.32	186.423	339.48	250.217	364.239	413.866	356.172	552.883	319.426	246.86	317.593	301.15	381.919	295.06	310.595	500.537	7.47486	0	13.7376	6.82088	5.08825	0	13.8241	0	8.45189	0	0	4.85271	0	5.87625	12.5497	0	26.0826	34.2357	15.9729	67.8377	43.8315	6.99483	60.5595	71.3633	44.6996
LPI_18:4_[M-H]1-	591.258	0.25	0.4375	0.75	0.75	0.625	7.34276	3	0	8.89508	29.5171	0	8.02889	34.2356	29.3904	31.8146	0	0	8.04788	10.6881	18.2936	11.1575	33.8088	6.57267	0	0	0	0	5.00174	26.4496	35.7132	22.3243	8.00577	0	0	8.15168	0	16.6292	8.97722	13.8379	0	0	0	0	0	12.2805	0	5.86068	0
PA(36:2)	699.496	0	0.0625	0	0	0	5.89902	5	507.76	771.097	629.987	541.06	746.175	803.159	832.492	986.907	533.431	546.294	692.567	717.703	692.554	607.196	725.055	958.739	29.3067	0	0.155686	87.0255	225.793	74.9432	23.3337	30.7347	31.5356	12.5329	19.6179	30.4468	42.5497	55.5589	17.7442	16.6691	11.9186	7.865	8.29816	11.3765	1.26958	21.0838	29.8706	14.2274	13.0951
PA(36:3)	697.481	0	0.5625	0.5625	0	0.6875	6.52912	5	8.06385	41.6697	26.9804	22.7164	49.9899	11.0848	29.2818	67.0246	13.3774	24.3268	49.0942	46.0326	75.1308	3.75117	51.7867	49.9252	0	4.63308	7.54372	9.0155	11.6533	0	0	0	0	0	0	8.03149	3.50328	0	0	0.21647	0	0	0	6.83395	1.08027	0	0	0	0
PC_30:0_[M+Cl]1-	740.5	0	0	0	0	0.3125	5.26285	5	525.845	608.34	731.496	499.089	702.82	779.503	678.476	1071.53	623.385	651.148	688.64	587.5	774.193	597.124	686.053	922.857	83.2978	3.12534	52.9755	115.18	258.759	80.732	99.5051	145.449	46.2528	63.3673	27.2357	52.3439	171.089	109.298	61.4631	53.2525	7.16531	11.3325	20.4383	28.4155	24.2056	19.7053	20.7505	35.3529	10.8568
PC_31:0_[M+OAC]1-	778.56	0.6875	0.125	0.0625	0.75	0	8.51862	4	0	0	0	5.46091	9.33571	9.40266	0	9.43954	0	0	9.55243	0	0	0	0	0	21.1753	2.77967	66.1819	6.78475	0	0.0357998	21.5591	0	11.7453	32.454	8.98936	16.3255	7.43096	11.7492	16.9272	50.3053	23.9995	30.8253	14.1241	0	7.58855	14.4589	5.36934	35.0364	40.3573
PC_32:0_[M+Cl]1-	768.532	0	0	0.0625	0	0.0625	3.41886	5	762.464	876.295	1004.05	693.073	1007.07	1061.89	1014.46	1579	828.245	964.727	1030.06	909.044	1063.63	905.946	884.396	1287.88	158.458	8.27141	128.15	325.661	476.616	407.412	285.309	218.589	105.443	61.6643	156.933	164.59	364.113	255.874	160.223	112.389	7.36605	45.2364	48.8338	48.5092	22.998	71.7877	57.3489	28.9399	21.5419
PC_32:0_[M+OAC]1-	792.576	0.625	0.5625	0.5625	0.5	0.3125	5.9826	5	0	0	0	0	0	0	0.337522	0.725601	0	0.103025	0	8.12371	0	6.09574	0	0.194355	0	3.06547	0	0	0	11.1221	0	0	0	6.47664	9.12465	0	9.09004	5.85113	0	22.1892	0	23.2874	0	0	0	0	5.26261	7.68998	9.16443
PC_32:1_[M+Cl]1-	766.516	0	0.0625	0.625	0	0.5	3.80477	5	138.457	161.689	329.313	166.855	241.398	284.962	239.529	506.252	142.649	266.4	233.665	193.89	263.023	236.156	177.342	380.847	8.41602	5.33867	8.14402	18.5881	44.7297	25.3462	4.91503	13.5385	10.2167	16.4369	0	12.0939	14.2353	24.6521	16.3806	8.14167	6.72721	0	8.36823	0	0	5.13915	10.1718	0	0
PC_32:2_[M+OAC]1- & PS_36:1_[M-H]1-	788.545	0	0.0625	0	0	0.125	2.05909	5	3149.82	3659.29	3624.63	2644.9	3636.8	4056.2	3849.52	5530.46	3280.06	2996.82	3613.81	3624.62	3793.15	3168.28	3677.95	4887.06	361.971	0	369.445	858.837	1066.98	842.082	630.755	565.242	237.214	210.17	298.621	310.812	344.944	229.019	647.821	109.887	77.0578	56.5683	117.133	122.534	82.4487	160.608	93.7301	186.161	51.5728
PC_32:3_[M+OAC]1- & PS_36:2_[M-H]1-	786.529	0	0.0625	0	0	0.1875	2.36449	5	2436.26	2820.73	2937.76	1900.79	2698.38	3144.13	3099.95	4144.81	2630.06	2309.51	2801.01	2941.07	3027.28	2324.76	2817.18	3582.69	310.895	0	211.542	615.525	882.53	640.687	462.038	545.381	164.121	135.688	155.575	280.022	231.876	152.378	400.777	70.3494	30.8727	17.1691	56.6092	55.2533	48.6932	35.021	84.3707	70.3661	12.2155
PC_33:1_[M+OAC]1- / PS_37:0_[M-H]1-	804.576	0.4375	0.1875	0.5	0.75	0.0625	8.01865	4	5.83112	0	0	4.4729	9.14811	8.77663	4.65571	0.0818576	6.47465	0	6.65791	0	4.89562	0	0	0	7.52545	5.31698	29.0675	7.29677	6.63287	7.65571	7.82394	6.54325	0	0.0195382	0	0	15.3611	7.45712	6.16378	29.5512	0	18.8266	6.92093	0	8.5091	7.28479	0	23.1377	10.9022
PC_33:2_[M+OAC]1- / PS_37:1_[M-H]1-	802.56	0.4375	0.4375	0.4375	0.5625	0	5.92078	5	9.00784	0	0	8.38152	7.14559	0	18.8057	18.91	0	0	6.4054	8.2672	0	0	17.9496	7.9908	7.43614	0	9.1081	0	0	0	6.15488	0	3.15974	20.3633	7.98413	7.52675	0	7.63463	0	26.5596	0	13.9846	15.5339	3.29668	7.7535	4.05473	8.19599	0	0
PC_34:1_[M+Cl]1-	794.547	0	0	0	0	0	2.59168	5	1676.66	1938.87	2248.56	1649.94	2195.21	2301.93	2214.15	3248.55	1843.12	1968.33	2082.93	2007.31	2325.39	1911.79	1996.06	2626.99	536.692	25.5944	407.012	766.586	988.551	924.488	650.844	723.186	445.163	293.401	414.505	555.355	820.729	673.181	732.045	426.258	22.5098	88.2957	173.279	202.954	114.965	174.113	124.49	184.677	112.263
PC_34:2_[M+Cl]1-	792.532	0	0	0.25	0	0.125	2.84601	5	446.004	497.126	624.871	434.469	514.27	671.142	611.088	947.657	450.441	510.146	575.223	503.773	665.7	528.128	547.62	708.79	78.8148	10.8235	23.2502	124.443	194.201	184.353	71.7185	104.068	46.5028	11.1002	23.9252	65.2025	140.785	91.5194	113.695	37.8957	0	7.30286	15.1723	26.6353	0	7.99851	4.47727	14.3107	14.5464
PC_34:2_[M+OAC]1- & PS_38:1_[M-H]1-	816.576	0	0.8125	0.6875	0	0.75	2.72879	3	41.0279	158.446	40.4772	42.5537	38.2581	119.855	74.3672	162.492	44.1337	51.3409	83.2886	79.1881	39.0342	30.2627	61.6159	121.987	0	3.03002	0	0	0	9.8883	0	0	0	0	0	8.31704	0	0	0	0	0	0	0	0	0	0	6.41165	0	6.62379
PC_34:4_[M+OAC]1- & PS_38:3_[M-H]1-	812.545	0	0.5	0.75	0	0.1875	3.89184	4	174.005	231.776	143.39	90.6136	137.865	226.584	256.393	370.667	193.588	177.958	159.192	235.063	207.56	151.362	159.943	282.832	4.5151	0	15.1746	0	7.79699	17.0271	0	16.4235	0	0	7.05355	9.36408	0	0	0	6.16214	14.1051	7.90933	8.52248	0	0	0	0	0	0
PC_36:1_[M+Cl]1-	822.578	0	0.0625	0.4375	0	0.4375	3.35941	5	273.009	335.95	490.84	291.097	412.958	439.856	415.423	641.649	316.916	300.99	367.217	351.375	361.298	190.297	329.703	550.578	26.3103	0	14.9771	29.1827	144.176	105.2	21.1287	75.837	20.6213	21.4126	22.883	31.6585	103.772	64.6094	43.1509	49.3275	0	0	8.62643	0	16.0386	6.23689	9.09979	31.6439	0
PC_36:2_[M+Cl]1-	820.563	0	0.0625	0.0625	0	0.25	2.37885	5	674.64	744.411	1014.48	724.023	1052.29	1130.97	887.92	1489.48	746.838	793.954	907.537	860.208	932.901	895.959	897.893	1166.8	112.711	0	116.012	282.292	374.015	238.95	231.947	195.144	49.2867	75.347	74.7279	101.906	260.824	184.13	217.444	94.8923	16.6288	14.7844	26.3069	12.9626	18.5644	37.82	15.6436	6.77537	6.75625
PC_36:3_[M+Cl]1-	818.547	0	0.1875	0.75	0	0.8125	3.3486	3	251.664	279.075	277.085	222.883	286.153	368.213	327.347	600.11	246.096	280.959	327.677	265.96	280.66	298.752	306.532	410.072	0	0	18.3475	26.3086	89.9013	27.3689	38.8283	37.7169	31.6592	0	17.3781	43.4849	62.7713	30.3434	25.0846	9.08682	0	0	0	0	0	7.928	0	0	0
PC_36:4_[M+Cl]1-	816.532	0.0625	0.6875	0.875	0.1875	0.875	3.17254	3	9.256	9.68031	16.2717	0	8.74576	27.4386	16.9524	34.8556	15.7733	16.031	7.17325	28.8839	16.4374	27.0207	15.9492	39.7956	0	0	0	7.59769	7.00339	0	0	8.46565	0	5.86331	0	0	6.61676	0	0	0	0	7.84829	0	0	0	0	0	0	0
PC_37:1_[M+Cl]1-	836.594	0.8125	0.6875	0.9375	1	1	7.11217	1	0	0	0	0	0	0	8.16863	0	0	0	0	0	13.992	7.80568	0	0	10.5776	0	0	0	0	0	4.52774	0	0	0	10.235	0	7.51259	0	0	7.80235	7.97381	0	0	0	0	0	0	0	0
PC_37:2_[M+Cl]1-	834.578	0.9375	0.875	0.875	1	0.625	6.1451	1	0	0	0	0	0	0	0	0	0	0	0	0	5.27652	0	0	0	8.89401	0	0	0	0	0	0	0	0	0	0	0	0	0	5.23843	0	0	0	7.13018	0	0	0	0	0	0
PC_37:5_[M+Cl]1-	828.532	0.6875	0.8125	0.9375	1	0.5	8.06849	2	4.0813	0	0	5.20586	0	0	0	5.07978	0	0	0	0	0	0	6.42019	7.09944	0	0	0	0	0	0	0	0	10.3569	0	12.1661	0	0	6.0152	0	0	0	0	0	0	0	0	0	0	0
PC_38:3_[M+OAC]1- & PS_42:2_[M-H]1-	870.623	0.625	0.9375	0.9375	0.8125	0.9375	6.31732	1	8.18031	8.1496	0	0	9.3383	0	5.85086	0	0	0	0	0	0	9.5139	0	8.8352	0	0	0	0	0	0	0	0	0	0	0	0	0	0	5.71021	0	0	0	0	7.40831	0	0	0	0	0
PC_38:7_[M+OAC]1- & PS_42:6_[M-H]1-	862.56	0	0.1875	0.625	0	0.8125	7.77114	4	712.795	739.888	817.669	608.85	806.673	954.379	892.435	1175.96	691.497	566.796	722.084	844.589	868.133	712.961	795.644	1035.9	16.0755	0	11.1816	48.4594	82.3472	33.8027	25.8715	9.41737	10.2376	35.3536	19.9464	20.5151	0	8.7433	49.6787	0	8.04013	0	0	0	0	0	7.60858	3.58772	0
PC_40:9_[M+OAC]1- & PS_44:8_[M-H]1-	886.56	0	0.625	0.875	0	0.4375	8.71601	4	6.4994	47.3421	7.60172	13.5235	49.7553	9.07176	44.5178	85.8855	30.4239	14.7921	33.9894	31.6786	44.6529	16.9365	6.66867	50.8333	9.99807	2.20167	0	0	0	0	0	0	0	6.89357	9.24823	0	4.87631	0	0	10.6343	0	0	0	0	0	0	2.89187	0	5.38271
PC_42:7_[M+Cl]1-	894.578	1	0.8125	0.875	1	0.6875	5.39696	1	0	0	0	0	0	0	0	0	0	0	0	0	0	0	0	0	0	0	0	0	0	0	0	0	0	0	8.1194	0	7.02289	0	0	6.90942	0	7.43304	0	0	0	0	0	0	0
PC_43:2_[M+Cl]1-	918.672	0.9375	0.875	0.9375	0.9375	0.6875	5.78813	1	0	0	0	0	0	0	0	0	0	0	0	0	0	8.66109	0	0	0	0	0	0	0	0	8.26589	8.63764	0	0	0	0	0	0	0	0	0	0	0	0	0	3.9425	0	0	0
PC_44:12_[M+OAC]1-	936.576	1	0.375	0.375	0.9375	0	5.8858	3	0	0	0	0	0	0	0	0	0	0	0	0	0	0	0	0	17.5713	2.77837	18.3782	0	5.34303	0	8.87355	0	12.4859	11.4414	53.0195	11.7192	0	0	0	10.1443	14.8472	14.6786	14.4398	0	6.97238	8.77305	7.30361	0	0
PC_44:2_[M+Cl]1-	932.688	0.9375	0.8125	0.6875	0.6875	0.5625	8.03532	3	0	0	0	0	0	0	0	0	0	3.26061	0	0	0	0	0	0	0	0	0	0	6.26748	0	0	0	0	0	0	6.24135	0	9.01883	0	0	0	6.99563	0	0	0	6.60989	4.66265	0	9.72352
PC_44:3_[M+OAC]1-	954.717	0.6875	0.5	0.375	0.5	0.25	6.32973	5	0	0	0	0	0	0	0	9.23746	0	0	8.51796	0	9.65103	0	5.3621	8.97235	10.3569	0	6.56747	0	5.39279	12.8976	7.09158	0	0	7.49485	0	7.09452	0	2.87135	0	0	8.61849	0	7.70121	7.14636	0	17.8527	0	3.55594	10.4875
PC_48:1_[M+Cl]1-	988.751	0.875	0.25	0.25	0.625	0.1875	6.0383	4	0	0	0	5.07733	9.24708	0	0	0	0	0	0	0	0	0	0	0	4.00801	0	52.9633	6.5753	0	14.4971	30.4657	9.26362	0	26.5066	12.8568	25.2899	0.204655	7.07485	0	11.4169	29.5118	13.1343	6.24821	13.7756	25.1934	9.28203	5.71367	7.89706	28.9459
PC_50:0_[M+Cl]1-	1020.81	0.9375	0.8125	0.5625	0.9375	0.6875	6.64503	2	0	0	5.21575	0	0	0	0	0	0	0	0	0	0	0	0	0	0	0	0	5.69851	0	0	0	0	0	4.5926	0	0	0	0	0	9.99143	7.29324	6.63371	0	0	7.65168	8.02844	0	0	5.4946
PC-2O_34:0_[M+Cl]1-	768.604	0.75	0.5	0.5625	0.75	0.5	7.89223	3	0	6.14269	0	0	0	0	0	8.7059	0	0	0	0	16.0695	0	7.02709	0	0	0	0	25.0012	24.4072	20.3094	6.9891	0	0	5.57764	0	5.19454	7.95332	0	0	9.10886	0	11.724	0	5.14215	8.06903	0	0	0	5.41862
PC-2O_40:0_[M+Cl]1-	852.698	0	0.125	0	0	0.125	6.80803	5	114.878	345.694	239.476	146.899	77.983	393.431	194.034	453.017	294.677	384.702	472.132	359.645	244.295	133.53	454.165	473.274	69.7847	0	75.0664	500.913	700.431	560.806	217.339	192.403	19.1997	40.4295	0	274.788	121.732	300.203	28.7947	52.576	41.2425	19.471	114.177	184.864	155.875	321.955	43.2803	381.975	144.836
PC-O_35:0_[M+Cl]1-	796.599	0.3125	0.4375	0.5625	0.375	0.375	7.9541	5	5.07175	0	0	5.92632	17.538	8.94038	0	18.0141	8.98283	0.10182	0	0	15.933	7.13794	4.52473	14.1863	0	2.23381	10.0784	0	5.63746	0	0	0	8.3785	10.9494	8.56743	0	0	13.5487	9.19754	10.368	6.75597	10.0895	0	0	0	0	5.70681	0	0
PC-O_35:1_[M+OAC]1- / PS-O_39:0_[M-H]1-	818.628	0	0.625	0.875	0	0.9375	4.77384	3	36.0438	45.3007	114.547	24.1085	78.8189	120.589	78.9505	183.881	41.7445	82.098	79.7059	51.832	125.478	68.1232	130.458	160.858	0	13.2815	0	10.526	38.0872	34.2013	12.1965	8.54004	0	0	0	0	0	0	0	0	0	0	0	0	0	0	0	5.63616	0
PC-O_35:2_[M+Cl]1-	792.568	0.1875	0.375	0.5625	0.0625	0.3125	8.99455	5	0	7.12302	5.88439	4.40312	7.33956	0	22.406	35.7927	9.883	28.6524	0	8.12371	16.065	21.8175	26.8284	12.1911	9.86183	3.06547	0	0	4.67534	10.8494	0	0	8.94	7.60777	9.12465	0	9.09004	5.85113	0	24.5673	0	23.2874	0	0	0	0	5.26261	7.02379	7.84336
PC-O_35:4_[M+Cl]1-	788.537	0	0.0625	0	0	0.1875	8.99101	5	3149.82	3659.29	3624.63	2644.9	3636.8	4056.2	3849.52	5530.46	3280.06	2996.82	3613.81	3624.62	3793.15	3168.28	3677.95	4887.06	361.971	0	369.445	858.837	1066.98	842.082	630.755	565.242	237.214	210.17	298.621	310.812	344.944	229.019	647.821	109.887	77.0578	56.5683	117.133	122.534	82.4487	160.608	93.7301	186.161	51.5728
PC-O_36:1_[M+OAC]1- & PS-O_40:0_[M-H]1-	832.644	0	0.5	0.5	0	0.875	4.75475	4	63.4853	91.1445	134.135	44.2448	74.1429	93.8623	77.9575	229.62	19.1176	58.3601	104.686	88.5639	129.009	77.1568	65.9369	181.899	0	0	20.6095	0.0862643	16.6421	13.32	7.58071	0	0	0	0	6.94267	5.50398	7.07914	0	0	0	5.39707	0	8.38422	0	11.3814	0	6.72246	0
PC-O_36:3_[M+Cl]1-	804.568	0.625	0.1875	0.5	0.875	0.125	7.58171	4	5.83112	0	0	4.4729	9.14811	8.77663	0	0	5.56049	0	6.65791	0	0	0	0	0	4.71656	3.62131	22.1179	5.37777	4.99514	7.65571	7.03981	10.656	0	8.64732	0	0	15.3611	7.45712	6.16378	29.5512	0	18.8266	8.49796	0	8.5091	5.9125	0	23.1377	10.9022
PC-O_36:5_[M+OAC]1- & PS-O_40:4_[M-H]1-	824.581	0.1875	0.6875	0.9375	0	0.75	7.38391	3	7.71042	0	24.9652	6.74026	0	20.5981	26.479	88.0798	16.5516	6.25005	37.8756	7.65958	9.31095	0	6.60944	46.5028	0	0	0	0	0	7.31619	5.06848	0	0	6.20158	11.3014	0	8.53337	0	0	0	0	0	0	0	0	0	8.14679	0	0
PC-O_37:4_[M+Cl]1-	816.568	0	0.875	0.625	0	0.6875	7.98311	4	41.0279	158.446	40.4772	42.5537	38.2581	119.855	74.3672	162.492	44.1337	51.3409	83.2886	79.1881	37.7864	30.2627	61.6159	121.987	0	0	0	0	0	9.8883	0	0	0	0	0	8.31704	0	0	0	0	0	4.5169	0	0	0	0	6.41165	0	6.62379
PC-O_39:0_[M+OAC]1-	876.706	0.6875	0.75	0.625	0.75	0.75	7.22876	2	8.28223	0	0	0	0	0	0	12.9591	0	3.24778	9.65142	0	0	0	0	28.4337	0	0	0	5.44711	23.0969	0	7.96606	0	0	0	11.0904	0	0	0	0	0	7.3955	0	7.54551	0	0	0	0	12.54	0
PC-O_40:1_[M+Cl]1-	864.662	0	0.125	0	0	0.6875	8.35153	5	13.28	63.5141	10.5759	7.33313	16.5053	62.1231	10.7819	16.7824	36.6853	34.0869	61.6541	20.8468	18.7689	46.0912	35.0932	84.1739	15.6631	4.10101	1.33321	58.5901	105.295	61.0886	14.161	7.09005	0	4.23138	0	26.5047	5.53604	45.1706	0.143058	0.115338	2.10555	1.53929	0.76263	7.90716	13.6802	7.69538	3.50868	41.9133	7.17997
PC-O_41:0_[M+Cl]1-	880.693	0	0.0625	0.0625	0	0.5625	6.97604	5	29.3161	72.394	68.4713	41.111	18.9726	105.129	51.3041	196.707	54.0882	138.852	103.683	90.2961	81.119	29.3239	167.272	149.004	31.8487	0	13.43	112.226	296.669	123.356	33.4315	10.7477	6.80413	7.92202	46.3421	60.7435	38.9645	79.2648	14.1765	0.988336	12.4154	6.91216	16.6674	35.0382	16.8792	43.275	7.13738	59.3532	0
PC-O_44:5_[M+OAC]1-	936.706	0.8125	0.375	0.5	0.75	0.5625	7.49752	3	0	0	0	0.151938	0	0	0	0	0	7.87938	0	0	0	0.349527	0	0	9.38116	0	0	0	8.27244	0	6.69341	10.8551	9.98799	2.53622	9.56492	0	0	8.64183	9.00711	6.74961	0	7.74679	0	0	0	7.52632	8.24732	8.49168	6.30677
PC-P_28:0_[M+OAC]1- / PS-O_32:0_[M-H]1-	720.519	0.125	0.125	0.125	0.1875	0.0625	8.40038	5	0	6.37156	0.644159	0.219558	0.51877	8.25835	9.0891	1.08591	0.774989	4.45317	2.48334	1.35608	0	8.31572	9.95869	0.0142469	21.034	0	42.8116	17.1028	1.09097	8.71241	14.4472	10.506	17.2513	19.1937	0	16.1653	20.8373	32.0502	8.1474	57.0471	21.9585	16.3291	34.3085	0	0	13.8489	10.0707	14.7011	63.7277
PC-P_29:0_[M+OAC]1- / PS-O_33:0_[M-H]1-	734.534	0	0.3125	0.375	0.0625	0.1875	5.19036	5	6.76964	68.9766	92.7678	58.0099	37.6105	60.3872	83.1861	63.453	30.6199	13.101	53.7916	63.7685	67.2664	15.6985	31.6806	65.7275	0	11.4315	10.1332	6.62454	0	13.2625	13.9164	0	15.6807	5.88568	15.4805	0	20.3884	0	8.27758	14.2633	12.2861	6.6751	13.3865	0	0	6.13365	6.104	6.1797	0
PC-P_34:4_[M+OAC]1- & PS-O_38:4_[M-H]1-	796.55	0	0	0.125	0	0.0625	8.5686	5	380.219	495.892	594.254	411.511	544.342	582.269	499.867	859.013	438.302	423.479	532.911	525.077	623.384	452.212	482.556	687.636	57.7016	3.79158	46.8029	117.595	162.969	153.647	69.8093	91.6095	70.8043	34.8368	20.7205	19.7146	98.7827	74.1317	77.3822	23.8744	16.6088	13.4803	17.8191	17.0424	28.6473	34.4489	13.9871	5.70136	13.6521
PC-P_35:2_[M+Cl]1-	790.552	0	0.1875	0.25	0	0.375	5.48507	5	322.372	302.041	277.308	185.079	245.967	387.27	269.982	554.607	300.648	163.18	257.404	335.748	317.753	206.881	289.679	473.539	15.271	0	6.46146	5.66803	7.12367	0	7.67434	7.97874	6.58199	10.6034	14.1651	6.02066	6.0146	7.1527	12.6009	0	0	4.0027	9.10162	0	5.64167	5.1852	7.3341	0	7.58919
PE_20:0_[M-H]1-	522.32	0.0625	0.1875	0.0625	0	0	2.4889	5	0	6.96879	36.4607	22.1073	47.7362	86.6296	127.965	63.6624	8.33725	7.70599	7.38477	39.2727	66.6358	72.4401	17.1332	26.5587	0	0	85.3467	33.968	70.3963	121.278	66.2186	14.3615	0	25.9348	63.1318	111.249	66.9227	189.02	69.8961	74.4616	6.79542	5.55388	73.1283	33.8372	39.8613	138.691	31.9266	90.0497	0
PE_32:0_[M-H]1-	690.508	0	0	0	0	0.3125	6.79854	5	687.456	781.753	785.928	715.441	884.133	889.479	968.543	1418.6	671.575	756.86	842.114	905.37	933.183	770.437	864.832	1072.13	263.553	8.20196	237.682	590.753	760.473	748.445	442.525	369.734	107.72	86.0409	91.2435	379.195	240.204	587.979	187.857	107.112	77.0491	31.4052	75.6252	272.733	134.099	316.936	58.166	260.392	168.058
PE_32:1_[M-H]1-	688.492	0	0.125	0.5	0	0.6875	4.81602	5	164.228	280.915	327.49	227.322	235.134	266.784	268.869	528.636	179.832	239.994	272.923	218.48	284.668	198.671	291.684	383.487	19.1514	0	0	58.2493	126.573	101.478	64.2652	35.0133	14.902	12.9219	18.6293	44.0139	30.7694	48.6662	14.6404	13.6376	5.27844	0	6.84558	6.69075	0	17.5413	0	9.4211	0
PE_32:2_[M-H]1-	686.477	0.25	0.625	0.75	0.5	0.9375	8.13273	3	5.35345	8.95963	7.743	4.64182	0	7.39381	16.0583	21.4816	5.3237	7.36479	0	8.97308	0	0	6.30547	15.5015	0	0	0	0	5.06089	8.31503	0	11.5307	0	0	16.496	0	6.13904	6.97089	0	0	0	9.9199	0	0	0	0	0	7.33114	0
PE_34:1_[M-H]1-	716.524	0	0	0	0	0.25	4.17331	5	2093.56	2543.13	2694.15	2039.96	2783.21	2931.68	2598.89	4203.71	2178.74	2312.73	2638.84	2581.35	2838.6	2462.37	2699.32	3669.06	557.343	10.9327	312.303	762.988	1065.77	977.46	639.236	753.071	355.26	271.287	435.543	475.713	713.743	397.09	829.145	398.882	84.2785	34.9341	183.478	340.881	157.881	181.897	216.041	310.796	120.437
PE_34:2_[M-H]1-	714.508	0	0.0625	0	0	0.0625	2.87198	5	1388.2	1634.96	1647.85	1324.27	1728.3	1882.19	1708.56	2478.08	1494.36	1587.31	1764.61	1642.51	1869.29	1477.91	1743.35	2321.7	228.269	0	161.391	462.444	712.325	615.345	350.058	457.595	204.134	137.15	208.078	211.7	432.226	283.178	435.119	136.926	29.1393	39.8203	73.0795	144.783	65.7013	90.8744	156.542	155.844	58.3541
PE_34:3_[M-H]1-	712.492	0	0.25	0.3125	0	0	6.77537	5	38.5552	89.9271	94.3908	74.5224	51.7776	90.865	100.065	280.161	83.5044	114.983	46.676	77.8654	100.663	30.4123	101.567	167.869	13.0164	0	0	0	27.3626	15.5342	2.76514	12.4147	7.89595	14.415	0	13.8116	38.915	11.9579	13.3201	13.8325	25.4372	43.5985	21.3071	3.50787	0	9.00067	0	16.2606	32.5794
PE_35:1_[M-H]1-	730.539	0	0.0625	0.0625	0	0.0625	7.24247	5	112.476	138.276	131.17	122.197	124.357	190.262	180.773	360.42	56.1133	135.07	94.0915	162.955	114.466	151.593	206.615	242.449	15.2171	0	25.2455	0.934173	33.3365	14.1678	21.4894	21.3642	24.7153	50.6209	39.6218	24.5647	22.3677	42.8672	11.9288	29.4729	27.6355	31.7693	26.4591	13.7069	12.5825	3.80621	21.7556	17.7003	30.3495
PE_36:1_[M-H]1-	744.555	0	0	0	0	0	4.55481	5	2464.71	2907.74	3097.98	2833.19	3239.93	3241.09	3165.49	4726.81	2559.25	2658.48	2968.09	3214.16	3223.18	2667.12	2970.87	3936.71	648.321	21.7608	577.159	989.615	1239.08	1055.03	786.68	866.708	571.607	425.396	592.328	606.821	1045.03	616.003	990.26	459.443	124.266	119.382	189.884	344.815	191.966	239.078	277	299.814	148.541
PE_36:2_[M-H]1-	742.539	0	0	0	0	0.0625	2.53266	5	6465.9	7406.26	8146.42	6312.07	8120.23	8568.99	8217.59	11940.6	6846.16	6941.74	7938.69	7793.96	8440.82	7319.82	7843.94	10183.5	1894.38	55.8785	1527.19	2610.58	3558.47	3018.5	2126.72	2467.1	1611.69	1106.8	1558.53	1588.38	2230.64	1782.28	2434.43	1298.1	499.522	576.185	781.341	993.32	716.117	765.165	807.412	1112.64	729.034
PE_36:3_[M-H]1-	740.524	0	0	0	0	0	4.85104	5	2526.16	2911	3200.63	2417.64	3181.27	3304.89	3114.05	4812.67	2715.66	2908.69	3153.55	3128.85	3381.48	2708.06	3206.83	4003.57	685.458	8.53065	472.819	1045.77	1477.72	1101.3	789.341	915.083	554.98	341.938	526.585	651.875	853.257	577.557	910.542	377.859	120.972	115.627	190.759	345.598	218.361	289.835	264.013	396.707	252.989
PE_36:4_[M-H]1-	738.508	0	0.0625	0.375	0	0.4375	6.33751	5	371.726	517.015	591.46	444.299	535.839	595.891	590.073	944.84	452.314	465.446	585.658	495.86	609.936	497.644	581.843	804.384	8.16575	0	12.2541	72.2855	202.441	117.656	87.1528	72.2822	32.52	0.00136257	35.3814	36.6401	84.5584	25.0517	33.0714	7.62782	6.80532	0	10.0537	4.15506	0	8.06877	7.60552	0	6.16012
PE_37:5_[M-H]1-	750.508	0.9375	0.6875	0.5	0.875	0.25	6.64849	3	0	6.66372	0	0	0	0	0	0	0	0	0	0	0	0	0	0	7.97915	0	0	0	0	0	0	7.09425	4.43944	6.68008	0	0	0	0	7.9056	0	11.8315	15.0368	21.323	0	7.03932	6.31192	6.18141	0	4.94947
PE_38:2_[M-H]1-	770.571	0	0.0625	0	0	0	3.65053	5	519.876	622.612	635.117	550.612	663.728	692.608	755.911	1109.63	427.462	493.98	539.544	570.747	727.6	483.359	605.018	800.619	53.0404	0	61.4458	121.7	159.875	117.738	89.7899	119.088	65.9976	59.128	82.8174	30.6048	173.44	70.7896	155.705	44.4916	24.8059	30.9602	21.7237	17.6141	32.2273	46.2077	30.4919	46.001	37.2702
PE_38:4_[M-H]1-	766.539	0	0.0625	0.3125	0	0	6.31409	5	237.738	269.297	356.713	256.33	315.253	396.055	345.138	594.004	280.271	312.711	354.753	367.491	381.745	257.627	346.013	521.054	64.1802	0	25.9454	42.48	100.277	25.3227	62.483	50.3383	186.288	31.3483	138.312	8.65254	36.9059	33.3298	93.5339	32.8878	19.6686	0.059463	9.07224	0	0	10.2178	11.5189	0.428356	4.19929
PE_38:5_[M-H]1-	764.524	0	0.125	0.3125	0	0.5	4.23318	5	104.007	104.997	148.934	98.3586	92.0556	154.871	154.969	344.781	100.449	130.427	178.53	80.6153	100.846	150.193	171.426	195.62	31.3333	2.39667	6.23768	11.9553	47.7997	31.8165	7.95593	16.6772	9.12351	8.55045	15.6449	0	5.87985	19.9882	9.00951	0	6.75141	6.24731	7.66209	0	0	5.90121	6.45721	10.6957	0
PE_40:2_[M-H]1-	798.602	0	0.4375	0.25	0	0.6875	8.95673	5	8.44144	44.6766	59.0026	21.1788	70.1119	60.0802	69.4736	113.005	72.9343	64.1989	19.1378	54.9668	84.5474	15.6921	121.883	81.2768	0	2.53839	0	22.1227	158.014	111.492	22.8951	22.54	0	0	0	27.2956	0	8.36515	0	21.8462	0	6.78198	0	24.2854	13.2599	12.3711	0	10.3486	7.27441
PE_40:5_[M-H]1-	792.555	0	0.0625	0.625	0	0.375	7.80575	5	1.15022	9.49492	20.6449	8.508	15.8344	17.7133	40.5118	46.1275	12.7201	33.574	5.59298	6.5448	32.567	22.9834	33.2525	29.8337	10.9	0	14.4347	0.623284	14.2357	7.37991	1.68466	2.50282	17.4308	10.7637	5.39742	0.637634	7.36717	1.63003	3.0762	24.4952	0	5.69234	0	0	0	0	0	6.73285	13.0668
PE_41:5_[M-H]1-	806.571	1	0.8125	0.875	0.9375	0.5	6.43672	1	0	0	0	0	0	0	0	0	0	0	0	0	0	0	0	0	7.48154	0	0	0	0	0	0	0	9.18096	5.41307	0	0	0	0	0	0	0	5.17736	0	0	0	0	0	0	0
PE_42:7_[M-H]1-	816.555	0	0.875	0.75	0	0.6875	8.93293	3	6.28039	66.933	12.0256	4.54861	6.80619	13.263	7.56863	22.3823	7.33815	4.21257	18.201	25.2132	0.352903	0.141562	7.61775	15.1665	0	0	0	0	0	4.43127	0	0	0	0	0	5.07206	0	0	0	0	0	6.89566	0	0	0	0	5.2729	0	0
PE_44:0_[M-H]1-	858.696	0	0	0	0	0	8.40665	5	425.394	868.193	604.048	482.246	523.514	780.852	591.114	912.839	692.432	825.188	890.713	825.728	600.25	546.5	909.176	1006.71	218.749	12.0933	462.864	827.654	1307.72	996.878	593.829	562.805	102.837	224.551	18.345	706.937	367.083	624.856	185.718	259.286	315.745	270.473	381.83	507.662	441.393	723.606	305.199	681.913	392.06
PE_46:1_[M-H]1-	884.711	0	0	0	0	0	8.91251	5	811.398	1387.04	1240.34	837.034	1044.97	1483.3	1037.47	1608.46	1230.61	1451.95	1669.95	1403.02	1252.22	1008.17	1527.03	1766.55	606.987	28.1506	728.715	1536.09	2044.04	1658.59	1031.62	961.909	254.928	418.518	163.82	1109.97	723.157	1224.1	587.019	494.473	505.104	512.086	605.409	946.948	754.169	1104.92	475.938	1103.63	651.82
PE_52:4_[M-H]1-	962.758	0.875	0.3125	0.0625	0.625	0.1875	6.38349	4	0	0	0	10.9391	0	0	0	0	4.40947	0	0	0	0	0	0	0	11.2066	0	27.8418	0	0	6.42339	13.826	8.67814	16.7513	18.0575	0	15.9671	4.68951	29.931	0	12.4851	8.22994	14.9004	12.0259	0	24.155	22.7822	8.18671	7.0964	28.9058
PE-O_36:1_[M-H]1-	730.576	0	0	0	0	0	8.23226	5	1207.93	2027.04	1589.71	1108.82	1403.43	2177.59	1650.14	1741.09	1857.9	1766.7	2213.1	1815.82	1913.26	1335.92	2128.82	1961.31	1213.37	7.40646	1450.19	2775.42	3193.62	2940.42	1832.22	1725.87	608.164	762.14	422.749	2233.72	1084.44	2254.66	835.487	1097.99	1354.26	1092.24	1247.22	1644.05	1620.65	1770.17	802.938	2287.15	1553.87
PE-O_36:2_[M-H]1-	728.56	0	0.0625	0	0	0	8.44131	5	1358.22	2166.71	1816.45	1144.06	1642.92	2383.04	1847.02	1960	1866.4	1926.06	2297.31	2074.59	2175.17	1381.94	2340.17	2066.49	1204.55	0	1098.27	2703.07	2959.66	2760.13	1643.95	1603.38	622.422	689.042	453.075	1802.89	1009.42	2175.47	686.303	1051.49	991.862	786.916	1000.01	1320.12	1331.34	1464.01	581.595	1933.34	1126.11
PE-O_36:5_[M-H]1-	722.513	0.4375	0.25	0.125	0.125	0.0625	7.61022	5	10.6423	27.1467	0	0	0	16.6884	6.92398	6.72096	0	7.90782	0	0	10.1218	0	14.8748	9.46843	14.4966	0	7.97668	13.2923	33.9747	0	0	13.6051	28.9967	15.5893	8.78069	8.77162	18.5922	33.4438	0	41.3427	32.1886	35.5737	0	0	13.6635	9.00567	12.4849	31.5864	68.7303
PE-O_38:5_[M-H]1-	750.544	0.6875	0.1875	0.125	0.5	0	6.83481	5	0	5.99279	0	0	0	8.29121	0	0	5.85792	0	0	6.85579	5.61674	0	0	0	7.07706	0	67.3059	21.8932	9.63966	0	0	23.2987	7.45434	37.2412	9.81305	11.3943	9.36559	17.7381	14.0691	7.3529	25.0606	33.8541	26.1785	6.97108	6.68495	18.971	21.3786	10.2732	33.851
PE-O_40:5_[M-H]1-	778.576	0.4375	0.0625	0.1875	0.5	0	7.09451	5	0.418196	0	0.237525	4.4883	0	7.03349	14.1991	6.72049	0	5.59493	12.6594	0	5.71275	0	0	0	17.4057	2.56916	66.7975	12.18	5.49753	33.7451	21.5591	0	13.7427	27.922	6.45983	21.6821	13.9549	33.717	16.9272	53.4737	26.478	30.8253	12.1564	0	7.79201	3.90405	5.51347	49.3138	43.7509
PE-O_42:1_[M-H]1-	814.669	0	0	0	0	0	8.83334	5	2210.89	4063.64	2677.98	1917.26	2097.52	3799.82	2624.78	3713.48	3384.79	3329.31	4156.4	3505.23	2635.1	2083.53	3999.14	4424.06	1705.73	27.0047	2565.78	4418.17	5841.17	5030.16	2932.72	2700.65	1040.52	1601.68	596.38	3860.71	1799.09	3393.01	1482.19	1674.98	2009.93	1839.78	2147.41	2505.19	2311.67	2681.14	1506.26	3692.85	2368.95
PE-O_42:2_[M-H]1-	812.654	0	0	0	0	0	8.81064	5	2322.08	4071.77	3015.78	2011.52	2522.18	4053.52	2745.97	3856.84	3548.54	3606.61	4494.78	3641.02	3356.75	2310	4159.26	4596.81	2052.8	31.9136	2372.25	4722.69	5804.06	5066.82	2948	2733.71	1103.58	1455.03	772.728	3547.88	2026.96	3563.69	1428.67	1789.43	2112.98	1774.49	2125	2737.99	2512.79	3258.81	1438.47	3875.98	2362.83
PE-P_33:2_[M-H]1-	684.497	0.5625	0.5625	0.625	0.25	0.3125	6.67156	5	0	0	0	11.5252	0	9.62832	10.4403	35.4298	7.22688	0	0	11.1664	0	0	0	21.1458	0	0	0	0	18.7581	0	0	7.3649	8.17934	4.52114	6.81055	0	0	7.18132	0	36.9169	5.81578	0	0	0	7.46436	0	0	0	5.47379
PE-P_42:2_[M-H]1-	810.638	0	0.0625	0	0	0	8.59613	5	872.328	1566.49	1117.21	727.124	888.233	1515.42	982.887	1471.22	1308.1	1455.01	1692.46	1374.5	1264.3	889.999	1549.81	1767.34	702.683	0	703.945	1739.87	2144.78	1814.15	1088.68	1025.5	298.818	458.014	145.264	1215.82	690.546	1272.32	457.34	491.403	684.346	471.137	702.562	960.971	933.562	1109.92	408.695	1383.49	708.943
PE-P_42:4_[M-H]1-	806.607	0.25	0.6875	0.5625	0.1875	0.9375	8.82615	4	7.47022	27.7074	15.1704	15.9091	17.0866	8.36291	18.024	0	8.62041	0	36.0946	23.014	0	0	15.9818	41.6723	0	0	0	21.1416	73.9459	38.8152	0	0	0	5.15328	0	0	0	19.8247	0	0	0	7.30135	0	0	8.27212	16.0013	13.8256	9.08992	0
PE-P_42:6_[M-H]1-	802.576	0.625	0.375	0.4375	0.5	0.0625	7.24319	5	0	0	0	2.81249	4.20424	0	11.4404	11.8087	0	0	0	0	0	0	10.5065	3.84163	7.44587	0	5.36786	3.96908	0	0	6.15488	0	8.12296	17.2484	8.6475	0	0	4.63176	7.41166	21.5648	0	11.8913	11.2646	5.74406	7.7535	15.2132	3.93669	0	0
PG(36:3)	771.518	0	0.4375	0.5625	0	0.4375	8.19116	5	34.4439	38.5255	33.5568	9.85503	42.8815	5.44616	6.10574	100.803	12.5336	21.849	14.233	15.6627	43.9435	12.4178	6.83847	43.2046	8.73746	3.64508	6.91134	0	0	0	8.76141	0	0	5.975	8.88734	0	9.41556	0	10.2043	11.7938	0	0	7.31147	0	0	4.72272	0	7.74731	9.2768
TG(47:5)+Cl-37	819.612	0	0.625	0.6875	0	0.9375	7.12238	4	23.7965	51.2894	39.035	36.7961	27.0004	69.3186	45.1781	63.4389	37.9279	47.2928	48.0413	40.8256	57.5571	32.9288	36.8197	48.017	0	3.03713	9.47417	7.23525	0	0	0	0	0	0	0	0	7.6861	0	9.35705	8.75564	0	0	0	3.48504	0	5.95206	0	0	0
TG(47:6)+Cl-37	817.596	0.375	0.875	0.8125	0.3125	1	8.62032	2	0	5.96804	5.36445	0.00562988	0	12.1076	10.4452	12.3394	0	0	0.407752	6.90846	0	11.0804	0	3.97287	0	0	0	0	0	0	0	0	0	0	17.7427	9.7518	0	0	0	0	0	0	0	0	0	5.24848	0	0	5.36382
TG(56:8)+Cl-37	939.705	0.1875	0.25	0.25	0.0625	0.5	7.09359	5	7.75844	9.51525	0	2.87399	0	7.73515	7.48923	20.6237	27.5287	6.89555	21.5778	16.8723	0	6.20315	16.7895	20.2972	0	4.21704	6.1158	43.5571	25.823	25.2462	0	6.44086	0	6.41373	0	9.50834	5.9197	5.14097	7.45592	5.02198	4.29949	11.5682	19.2236	7.33519	0	7.36652	5.51811	0.184057	0
TG(57:6)+Cl-37 & TG(56:10)+Acetate	957.752	0.6875	0.5625	0.3125	0.75	0.25	6.62647	4	0	0	8.25461	6.86895	0	0	0	0	5.48693	3.95007	0	5.535	0	0	0	0	0	0	19.2458	0	4.67238	7.42054	6.90206	0	0	5.47996	0	0	21.882	7.72681	0	0	0	19.4363	7.99878	0	0	9.57427	4.15036	6.12865	5.6538
TG(57:7)+Cl-37 & TG(56:11)+Acetate	955.737	0.625	0.5625	0.25	0.6875	0.3125	7.28438	5	0	6.89818	0	4.6291	0	0	10.8628	0	0	0	16.1895	7.44311	0	0	12.3205	0	13.214	0	0	6.40547	0	8.37126	28.5433	0	0	0	6.87773	4.91871	0	5.78467	0	0	8.62771	10.4048	5.07704	0	0	17.8014	0	18.1099	0
TG(58:5)+Cl-37 & TG(57:9)+Acetate	973.784	0.9375	0.3125	0.3125	0.75	0.125	6.65985	3	0	243.593	0	0	0	0	0	0	0	0	0	0	0	0	0	0	8.91002	0	25.474	7.01924	7.39635	0	0	30.9159	21.3252	8.92843	0	6.99662	17.0303	15.2942	0	31.9327	0.44312	13.8084	16.2759	0	9.94126	0	46.6739	17.7344	31.1449
TG(60:8)+Cl-37 & TG(59:12)+Acetate	995.768	0.75	0.25	0.625	0.8125	0.3125	6.28957	3	0	0	0	0	0	0	0	0	5.52956	0	0	0	6.77734	7.59876	6.39036	0	0	0	7.04825	6.85585	4.85289	0	0	10.2572	13.1382	16.9565	10.1134	9.39081	22.8654	3.79471	6.75098	10.8876	8.2974	0	7.93044	0	0	0	9.96194	0	0
TG(60:10)+Cl-37 & PI(45:0)	991.737	0.6875	0.375	0.1875	0.875	0.125	7.11452	4	0	7.82603	0	0	0	5.73403	5.98661	0	0	0	0	0	7.74666	0	0	8.94079	17.7841	0	10.1395	6.66916	5.71018	0	19.7404	0	0	6.56271	0	7.1536	0	7.28799	9.20065	26.9135	17.5522	13.9529	21.5566	0	0	2.34879	10.8632	15.1397	28.7939
PG-O_38:2_[M-H]1-	787.586	0.1875	0.0625	0.25	0.125	0.0625	7.52123	5	12.9555	14.1661	11.103	7.05979	10.5805	7.13755	0	31.1276	0	0	7.02571	5.55644	10.0327	16.4831	21.2762	15.7574	9.41448	14.4462	13.7104	15.8478	10.8193	13.7005	30.0452	8.50565	9.0105	11.2785	7.20689	19.9477	21.9988	8.66726	0	6.59992	29.7104	20.8289	0	0	8.15624	21.4535	26.8195	24.9154	31.6989
PG-O_40:2_[M-H]1-	815.617	0.375	0.75	0.6875	0.3125	0.875	4.05798	3	0	14.4566	26.6434	11.3589	7.56324	18.156	0	36.4506	0	0	0	36.1299	17.641	0	29.0794	70.7008	0	26.785	0	6.95914	0	7.85919	15.5539	0	0	0	0	0	0	0	0	0	8.68717	0	0	0	8.41132	0	0	4.35849	0
PI(34:0) & PA(47:10)	837.549	0	0.6875	0.8125	0	0.375	5.39377	4	44.7999	91.4085	107.228	78.2853	50.7791	122.28	72.1648	236.926	56.603	53.2735	66.564	71.4332	74.9497	84.5356	80.8032	121.078	30.6871	0	8.15938	0	9.91467	0	0	0	0	6.20696	19.5398	0	0	0	0	0	0	9.65508	0	0	7.35913	3.67186	0	0	0
PI(36:1)	863.565	0	0.125	0.625	0	0.875	2.15304	4	1356.28	1402.21	1588.58	1235.18	1693.84	1774.46	1700.27	2391.51	1403.3	1202.37	1593.5	1506.12	1765.78	1409.13	1643.89	2023.36	142.225	0	84.2457	278.344	268.79	207.744	209.952	226.103	70.1293	56.7454	71.4703	46.348	96.955	97.7673	366.66	0	0	4.97198	0	0	0	0	0	15.1818	0
PI(36:2)	861.549	0	0	0.3125	0	0.5625	3.61693	5	1463.96	1625.45	1715.05	1230.07	1801.84	1847.05	1780.46	2417.47	1402.37	1358.05	1597.56	1560.09	1778.99	1413.63	1588.99	2148.21	74.4112	4.03178	52.097	309.459	314.638	182.449	245.216	212.606	110.837	23.405	101.403	66.4538	167.171	60.194	307.518	24.2537	0.248402	7.25273	5.55482	22.6795	15.5387	0	0	0	0.874758
PI(36:3)	859.534	0	0.0625	0.5	0	0.625	2.38021	5	273.061	294.187	348.435	249.064	344.85	460.837	354.469	604.384	273.505	176.687	377.747	417.812	356.845	335.986	375.262	520.864	10.4687	0	8.93338	65.0763	78.9582	17.0612	14.8151	11.3435	8.5383	8.16797	27.409	8.78498	46.0718	8.81739	20.2812	17.1158	7.13892	0	0	6.75292	8.63945	0	0	7.36401	0
PI(38:3)	887.565	0	0.875	0.875	0	0.875	2.72835	2	44.0123	102.87	77.2643	105.256	44.3649	84.6356	64.1281	309.572	71.6077	47.3373	95.9396	124.756	60.168	43.7562	106.051	157.879	0	0	0	0	12.8933	0	0	0	0	0	0	0	11.6168	0	0	0	0	0	7.99942	0	0	0	0	0	6.08751
PI(38:4)	885.549	0	0.6875	0.9375	0	0.4375	3.73815	4	111.472	128.378	171.952	192.794	166.219	190.655	221.263	318.361	161.551	101.786	175.253	227.402	202.116	108.743	219.545	306.977	0	0	0	6.51545	0	0	17.2225	0	9.74737	12.2123	0	0	0	0	0	10.1073	0	0	0	0	0	0	0	0	0
PI(38:5)	883.534	0	0.4375	0.6875	0	0.0625	3.82268	5	41.5759	24.1752	88.3853	84.3656	64.329	39.4679	44.1166	101.745	27.857	32.5751	50.0083	40.2542	44.8635	21.2592	70.4285	182.553	11.0509	0	0	8.61155	0	10.3661	0	0	0	9.10027	12.4322	8.58844	9.19843	8.23204	0	17.9955	0	0	0	0	5.22406	0	0	0	0
PI-O_30:1_[M-H]1-	765.492	0.875	0.8125	0.4375	0.875	0.3125	8.93488	2	0	0	4.0865	0	0	0	0	0	0	0	0	0.0561234	0	0	0	0	0	0	0	8.06929	3.49988	0	0	0	10.8181	0	0	0	0	0	0	0	6.85332	0	0	0	0	0	0	0	6.28576
PI-O_35:0_[M-H]1-	837.586	1	0.75	0.8125	0.875	0.5625	7.30842	1	0	0	0	0	0	0	0	0	0	0	0	0	0	0	0	0	0	0	0	0	0	0	0	7.30359	17.8121	10.2574	0	6.70445	0	0	0	0	0	5.39228	0	0	0	0	5.33786	0	0
PI-O_36:2_[M-H]1-	847.571	0.6875	0.75	0.9375	1	0.75	6.99548	1	0	0	0	0	5.52852	0	3.54156	7.13939	0	0	0	4.97265	0	0	0	7.40529	8.85404	0	0	0	0	7.00881	8.43581	0	9.57803	0	0	0	0	0	0	0	0	0	0	0	0	0	0	0	0
PI-O_37:1_[M-H]1-	863.602	0.875	0.625	0.75	0.75	1	4.47737	1	0	0	0	0	0	0	0	0	0	3.67265	0	0	9.29948	0	0	0	0	0	0	0	7.00346	0	0.142753	0	5.85773	5.57964	8.94275	7.75698	0	0	0	0	0	0	0	0	0	7.59074	0	0	0
PI-O_38:5_[M-H]1-	869.555	1	0.875	0.9375	1	0.5625	6.31686	1	0	0	0	0	0	0	0	0	0	0	0	0	0	0	0	0	7.87582	0	8.56003	0	0	0	0	0	0	0	0	0	0	0	0	0	0	0	0	0	0	0	0	0	0
PI-O_42:1_[M-H]1-	933.68	0.125	0.1875	0.8125	0.0625	0.6875	6.76304	4	17.019	0	66.6088	0	39.3298	37.2675	41.4416	44.4452	14.6629	20.649	28.1591	5.0683	65.8758	34.0467	0.481917	16.7343	9.18208	1.76653	0.12122	27.0715	0	4.68399	0	39.1003	9.99202	3.4612	15.3171	4.58197	0	8.02386	100.234	7.80096	0	0	0	0	0	5.12703	0	0	0
PI-O_42:6_[M-H]1-	923.602	0.9375	0.8125	1	0	0.8125	5.55883	1	0	0	0	0	0	0	0	0	0	0	0	0	0	0	9.01214	0	0	1.24156	8.95019	0	0	0	0	0	0	0	0	0	0	7.16113	0	0	0	0	0	0	0	0	0	0	0
PS_34:5_[M-H]1-	752.451	0.9375	0.9375	0.6875	0.9375	1	8.61799	1	0	0	0	0	0	0	0	0	0	0	0	0	5.31904	0	0	0	0	0	0	0	0	0	0	0	0	5.38825	0	0	0	0	0	0	0	0	0	0	0	0	0	0	0
PS_40:9_[M-H]1-	828.482	0.9375	0.875	0.625	0.875	0.875	7.57074	1	0	0	8.2808	0	0	0	0	0	0	0	0	0	0	0	0	0	0	0	0	0	4.16982	0	0	0	0	5.60925	0	0	0	0	0	0	0	0	0	0	6.64851	0	0	0	0
PS-O_36:3_[M-H]1-	770.534	0	0.0625	0.3125	0	0.1875	8.75849	5	79.321	86.0781	145.015	86.9287	112.961	165.444	151.017	341.558	126.873	81.094	176.06	154.636	134.716	65.3855	115.279	217.025	21.4943	0	7.32114	35.9332	12.9891	23.9305	15.5769	0.0711217	63.9975	16.138	24.0177	13.6833	35.2797	7.20101	16.2535	20.4536	9.02742	5.01469	8.92541	0	0.476386	4.96025	3.93303	24.3336	11.0319
SM_33:1_[M+OAC]1-	747.566	0	0.0625	0	0	0	7.82279	5	186.265	354.038	419.205	240.199	359.894	569.275	311.32	684.067	401.669	434.421	511.42	428.03	509.206	217.88	571.391	648.267	155.875	0	246.937	531.563	775.899	608.208	367.244	328.486	38.6687	66.2499	27.7379	359.988	205.532	430.29	116.392	172.49	83.5047	87.4895	146.648	307.392	220.541	261.954	79.7331	467.352	200.696
SM_34:2_[M+OAC]1-	759.566	0.0625	0	0.0625	0	0	8.72036	5	10.1451	28.9925	12.5842	0	6.61975	0.255872	9.30795	22.1962	5.64905	7.85536	7.38996	9.69444	6.81388	0.344295	15.4812	36.0976	20.6934	5.39362	53.5876	6.47379	6.62519	16.6827	29.2977	16.8737	57.8617	66.9733	25.9071	18.6582	27.8748	35.5755	8.12983	71.4384	34.0072	60.9573	23.316	21.9883	19.591	24.5154	23.4772	22.9555	20.0318
SM_39:1_[M+OAC]1-	831.66	0	0.1875	0	0	0.625	7.47699	5	19.6413	55.1442	79.0936	45.8862	34.1631	118.046	57.4278	97.4429	86.2642	128.57	158.518	158.241	64.3597	17.9982	162.432	186.521	18.6568	0	48.7651	114.661	332.562	192.621	71.8349	43.4278	0	12.3983	0	110.152	31.1006	51.6052	13.0933	28.1128	15.5124	7.60972	19.0804	58.4658	48.1688	84.037	18.4978	74.3728	74.7315
SM_41:0_[M+OAC]1-	859.691	0	0.1875	0	0	0.25	6.57519	5	53.4714	144.411	51.7066	66.7727	40.9285	108.195	76.7333	253.366	116.686	185.029	217.434	171.833	88.1374	123.752	237.365	318.494	44.661	0	148.436	260.822	438.182	323.278	112.825	95.8002	0	16.2457	0	123.123	18.2184	98.4574	18.2797	29.0507	20.9886	33.4831	36.2302	75.1458	60.9369	105.678	55.0481	147.139	98.5545
SM_42:3_[M+OAC]1-	869.675	0	0.375	0.0625	0.0625	0.625	8.03006	5	13.2339	37.4322	6.23026	9.52491	13.7208	11.0858	1.01029	38.7743	18.9454	31.1141	31.7227	14.0046	23.3477	15.9159	30.6146	81.9627	2.52191	9.61222	0	7.6512	52.6976	43.7757	13.7492	2.31449	0	0	0	13.0761	10.4382	30.9886	0	0	1.61193	0.443262	0.560257	34.9595	0.525734	3.11578	0	7.81304	9.36309
SM_43_1_[M+OAC]1-	887.722	0	0.125	0	0	0.25	6.53796	5	38.4606	220.811	163.212	82.1151	83.0957	223.745	89.639	240.774	139.762	202.33	271.711	153.783	121.51	148.952	245.404	324.552	67.2106	0	82.2458	298.085	412.239	285.589	117.44	173.88	31.3805	55.4468	0	240.277	52.1713	152.997	41.5517	26.1738	103.32	37.6673	46.8017	132.836	57.5519	224.412	93.3535	229.485	46.0406
SM_44:2_[M+OAC]1-	899.722	0	0.1875	0.0625	0	0.4375	6.08336	5	4.18604	73.1495	44.0919	15.8718	30.656	57.0944	9.62718	91.3054	32.7574	72.4561	79.9442	53.9568	44.1898	25.2924	93.2332	109.072	6.05913	32.5701	21.9792	44.0368	136.13	67.2993	66.203	21.1352	0	10.4855	10.2206	27.899	29.789	47.6144	0	0	0	14.8174	7.18389	55.5608	7.73591	66.7228	4.26436	25.9564	23.1372
TG(30:0)+Cl-35	589.419	0.1875	0.5	0.625	0.0625	0.8125	8.98657	4	13.6749	10.2206	7.8219	0	0	48.2803	7.70762	35.7005	45.1093	7.07235	9.16663	16.7301	17.3197	0	20.2982	17.3509	0	0	15.4703	22.6149	27.4976	23.8531	12.5327	0	0	0	0	0	5.36187	31.0801	0	17.2199	0	0	0	0	0	13.4318	0	5.46081	0
TG(32:0)+Cl-35	617.451	0	0.0625	0	0	0.125	5.77962	5	261.252	303.101	451.223	237.638	475.396	555.469	499.115	395.709	443.439	393.67	341.427	379.241	566.51	282.479	439.652	401.429	254.237	0	161.097	453.843	534.865	634.004	332.032	237.509	17.0475	63.6127	41.282	241.55	110.27	503.112	23.7012	142.473	86.3203	29.5423	48.3294	125.408	114.422	133.605	13.2117	296.2	85.2115
TG(34:0)+Cl-37	647.479	0	0.0625	0	0	0	7.06024	5	317.279	443.384	438.459	223.621	362.707	633.092	525.392	386.559	441.303	464.274	535.158	459.028	649.636	170.646	492.331	370.867	273.937	0	194.195	665.446	769.438	821.855	429.969	393.654	36.118	102.141	61.3948	443.383	129.467	681.577	65.8963	196.085	226.679	120.908	82.8588	226.752	232.451	319.657	31.8257	426.391	207.208
TG(38:3)+Acetate	719.573	0.4375	0.5	0.4375	0.25	0.4375	7.92849	5	0.42663	0	0	8.07873	0	0.352272	6.34228	0.723576	0	6.62876	0	7.54903	0	0	4.20906	6.70888	5.54026	0	0.700465	4.40573	8.9869	4.78093	6.48129	0	0	0	0	6.65875	0	1.52412	0	0	5.1906	0	0	0	0	0.663823	4.22922	4.03231	0.634642
TG(39:0)+Cl-35	715.56	0	0.0625	0	0	0	6.02532	5	239.344	432.593	376.408	196.26	291.198	567.479	437.859	437.817	436.47	408.595	522.517	386.105	500.488	219.155	542.769	406.966	222.321	0	274.432	646.79	741.716	649.719	392.118	333.173	112.653	97.9581	77.3124	423.238	174.086	490.56	112.326	215.572	203.916	74.7151	169.939	343.198	248.452	306.196	106.256	502.168	265.974
TG(40:0)+Cl-37	731.573	0	0	0	0	0	3.85603	5	757.146	1199.22	980.315	649.035	884.61	1392.75	987.265	1107	1053.77	1081.54	1303.27	1231.97	1239.24	811.662	1348.06	1183.33	767.425	4.70086	924.934	1755.45	1939.04	1937.69	1182.69	1033.55	400.654	506.083	271.697	1407.67	560.205	1458.01	485.285	783.567	727.605	710.897	731.006	1002.75	1017.77	1131.92	457.949	1513.34	950.545
TG(40:3)+Cl-35	723.529	0	0	0	0	0.0625	3.88834	5	340.32	499.889	509.954	260.672	410.555	589.875	444.706	585.824	534.926	521.815	675.745	491.656	662.425	321.391	579.521	593.953	261.792	7.07536	134.536	711.765	710.769	691.672	470.001	340.349	60.6387	89.3043	41.3023	455.675	168.591	604.031	135.012	130.397	134.214	45.9958	88.407	157.145	128.951	221.778	34.823	424.772	121.822
TG(40:4)+Cl-35	721.513	0	0.0625	0.0625	0.0625	0	6.2167	5	20.2118	57.69	27.9951	12.1328	41.7636	30.1619	57.3447	42.9902	32.6841	28.5551	41.2484	44.5092	20.2886	19.141	18.6241	27.2404	15.0845	4.68236	41.6043	50.3899	166.878	67.0419	31.5422	19.6654	16.0893	15.1822	20.7392	26.7317	30.1564	54.3568	0	44.6494	47.5651	37.1449	10.6421	26.0607	0	31.959	21.0727	39.0916	52.8657
TG(41:1)+Cl-35	741.576	0	0	0	0	0	5.82702	5	90.0877	269.149	182.62	79.871	110.797	344.409	172.604	236.65	181.931	267.631	281.73	281.57	287.041	68.1784	285.841	259.607	76.4593	3.38301	54.7907	366.987	475.325	423.751	145.683	105.641	7.92016	61.1673	27.0413	220.417	61.5538	208.987	38.5454	123.627	50.8224	63.8547	43.2848	106.259	81.8081	149.101	28.2764	220.124	109.649
TG(41:2)+Cl-35	739.56	0	0.0625	0	0	0.0625	6.74011	5	24.128	110.906	55.1011	53.1717	65.8582	134.321	85.8382	158.523	88.6271	84.6838	59.8019	68.2725	91.192	49.7036	57.1472	72.3846	21.3111	0	45.4378	40.3705	72.9512	45.1333	17.4975	31.7472	50.2483	36.729	25.3482	28.8743	28.708	59.9143	21.2256	72.7094	25.7701	26.0417	31.3443	4.91388	42.2398	26.1311	21.4062	20.6637	13.6759
TG(42:0)+Cl-35	757.607	0	0	0	0	0	4.98137	5	2284.99	4024.81	3186.14	2126.96	2660.06	4176.85	3151.91	3519.58	3635.41	3449.64	4187.65	3432.91	3510.34	2562.93	4019.76	4089.39	2292.09	18.176	3253.39	5322	6027.89	5679.22	3566.18	3461.45	1436.4	1752.67	1145.77	4477.68	2195.75	4212.4	1736.94	2357.58	2748.5	2452.19	2849.74	3039.03	3024.36	3567.68	1713.69	4743.1	3031.47
TG(42:2)+Cl-35	753.576	0	0	0	0	0	5.26182	5	829.156	1248.8	1078.57	718.236	948.889	1404.45	1071.55	1295.17	1145.65	1333.98	1374.66	1190.2	1355.87	835.37	1405.28	1423.71	721.682	6.87331	655.099	1499.08	1833.49	1605.27	967.479	808.532	286.06	407.153	237.256	1105.64	565.915	1250.38	405.87	560.378	534.014	359.335	596.717	729.46	815.62	957.064	328.984	1068.01	648.516
TG(42:3)+Cl-35	751.56	0	0	0	0	0	4.56991	5	107.092	202.573	174.716	102.818	144.307	319.763	148.141	281.262	203.276	293.748	234.192	221.009	325.729	115.526	329.536	266.066	79.4083	2.50403	68.2671	282.977	484.521	348.69	178.544	85.5644	36.0778	66.8654	57.5723	197.933	64.6654	294.188	43.7884	82.6066	45.5407	37.5743	55.6885	64.3064	74.2466	137.982	56.041	175.482	129.601
TG(42:4)+Cl-35	749.544	0.1875	0.1875	0	0	0	6.73437	5	0	9.27873	34.344	11.5654	0	9.41504	26.0779	25.4776	0	17.3764	25.9899	5.55936	11.2091	7.21939	7.42698	15.5404	0	0	45.4259	49.4237	60.9919	44.1848	20.282	11.9153	13.9299	41.5244	34.2593	56.2334	15.2757	30.9788	0	63.1713	46.5127	51.9544	32.1857	14.3691	15.2062	24.6715	10.9704	8.69583	85.9832
TG(42:5)+Cl-35	747.529	0.25	0.125	0.25	0.125	0.125	6.84988	5	6.83298	26.0308	0	13.5658	8.01408	7.01834	0	23.5661	9.73105	16.1588	13.6398	0	5.89949	0	16.8106	16.8996	0	5.2356	9.04871	18.4244	13.5607	7.3313	21.5826	17.6747	15.9876	6.33568	17.6302	7.27545	22.6709	14.9453	0	17.672	5.86483	10.0741	0	0	0	5.98903	9.86628	25.6788	19.4958
TG(43:1)+Cl-35	769.607	0	0.0625	0	0	0.3125	6.06147	5	173.698	435.281	280.615	155.657	205.204	380.001	292.597	417.175	367.764	320.462	506.785	396.707	308.831	168.254	454.789	444.693	92.7154	0	98.3352	519.792	656.889	569.065	204.268	189.659	18.5356	50.9487	12.7169	382.346	165.445	308.993	40.7143	90.3425	106.81	41.0629	112.551	188.578	187.462	299.765	73.5273	338.956	140.888
TG(43:3)+Cl-35	765.576	0.3125	0.1875	0.25	0	0.1875	8.17536	5	0	17.4186	7.69386	0	0	10.7745	37.2071	8.47437	16.8973	13.1198	11.8402	0	0	16.5063	9.19016	20.9498	4.88299	0	9.03765	0	0	14.2729	8.56543	28.3076	22.6338	21.2257	11.58	8.45278	7.71567	26.4706	17.2674	19.9675	41.0658	16.8711	7.62863	5.34535	0	7.06446	6.24471	19.4923	34.0183
TG(43:5)+Cl-35	761.544	0.9375	0.375	0.25	0.5625	0.125	7.33911	4	0	0	0	0	0	0	0	0	0	0	7.0861	0	0	0	0	0	0	3.4532	25.6499	0	0	0	8.2725	10.3254	8.38756	18.2797	17.9853	6.95337	0	21.1693	0	7.1048	5.56876	29.606	18.0369	7.68558	0	6.01542	2.46115	7.86678	6.61347
TG(44:0)+Cl-35	785.638	0	0	0	0	0	4.9953	5	3431.84	5914.96	4170.2	3140.57	3454.7	5620.46	3905.83	5077.56	5298.93	4932.11	6167.3	5245.25	4333.04	3293.84	5942.04	6285.25	2820.41	39.9051	4160.83	7227.81	8610.25	7659.98	4641.79	4264.19	1868.98	2475.2	1256.21	5988.48	2850.56	5425.49	2274.48	2819.59	3438.81	3082.26	3762.11	4106.19	3934.64	4698.07	2504.74	6124.14	4020.69
TG(44:0)+Cl-37 & TG(43:4)+Acetate	787.635	0	0	0	0	0	4.86361	5	863.419	1607.16	1117.33	766.819	929.624	1647.45	1089.14	1382.94	1437.24	1312.59	1746.99	1463.14	1088.8	772.443	1581.91	1719.97	720.866	4.33696	1102.21	1931.31	2411.88	2233.33	1221.33	1143.46	421.239	637.215	269.842	1619.79	739.199	1488.01	619.976	847.852	898.521	822.97	947.614	1084.22	1010.24	1286.48	610.321	1665.76	1027.99
TG(44:1)+Cl-35	783.623	0	0	0	0	0	4.60298	5	3314.32	5343.06	4244.41	2841.41	3528.65	5459.48	3789.15	5357.52	4696.29	5091.84	5776.84	4900.2	4708.36	3158.15	5640.33	5840	2749.58	35.2861	2916.94	6531.51	7971.58	7009.9	4011.96	3745.61	1456.64	1937.28	1203.75	4591.15	2791.55	4864.8	1965.47	2518.82	2754.3	2358.5	2839.19	3474.61	3585.09	4326.32	1730.09	5064.94	3099.61
TG(44:2)+Cl-35	781.607	0	0	0	0	0	5.03386	5	1161.49	1897.86	1547.96	981.381	1304.83	2045.59	1382.15	1857.49	1628.25	1833.79	2075.04	1826.59	1799.37	1205.89	2013.24	2164.03	973.233	15.1571	1011.33	2263.43	2770.51	2369.51	1324.06	1233.41	383.726	589.462	296.326	1583.98	917.386	1735.46	676.75	838.809	867.039	618.762	865.075	1225.9	1225.58	1361.81	564.523	1515.88	898.825
TG(44:3)+Cl-35	779.591	0	0.125	0	0	0.125	6.19216	5	208.334	309.346	223.86	118.692	190.792	518.472	202.24	461.296	232.953	331.416	472.369	325.283	293.076	115.064	373.231	366.528	89.8878	0	59.0316	436.805	527.064	460.112	175.967	182.175	18.1657	61.1248	0	208.27	80.9548	248.91	51.0246	25.2547	49.1238	28.3129	58.1663	71.6399	116.988	157.77	28.8858	251.335	101.742
TG(44:5)+Cl-35	775.56	0.3125	0.0625	0	0.125	0	7.59997	5	0	25.7411	14.5523	0	0	16.5386	0	15.3848	5.74202	20.6674	5.354	9.58391	0	6.75657	13.8651	7.58804	14.7603	12.745	62.5473	0	19.4784	12.3632	12.1439	9.55912	21.6068	54.9929	13.6905	18.4535	13.5947	14.7243	9.90563	37.8217	38.2011	44.0789	7.92498	5.74628	19.7914	6.19997	31.6145	20.8776	50.1836
TG(45:0)+Cl-35	799.654	0	0.0625	0	0	0	6.30219	5	500.517	883.16	617.489	428.982	528.107	898.098	541.253	829.973	786.788	770.697	964.962	823.066	713.42	503.503	916.385	1062.15	399.828	0	532.622	1085.25	1410.8	1222.91	730.278	615.734	138.267	343.98	96.6429	851.005	358.687	795.638	187.076	337.843	504.877	476.763	467.58	633.1	550.739	691.861	289.036	945.575	602.948
TG(45:1)+Cl-35	797.638	0	0	0	0	0.1875	5.20076	5	389.646	668.564	501.11	306.616	363.011	650.406	447.261	654.485	568.123	653.091	760.759	606.366	538.89	370.837	711.963	802.682	253.198	5.78376	317.146	838.577	990.999	834.766	478.614	397.678	104.408	165.233	25.4449	563.067	236.437	589.975	123.999	162.385	241.574	269.452	201.932	346.111	343.264	513.071	148.001	568.858	267.063
TG(45:2)+Cl-35	795.623	0	0.375	0.125	0	0.5	3.7892	5	33.8956	96.0756	80.2577	32.4579	36.0598	111.649	55.6754	130.42	80.5565	113.785	148.201	89.8536	80.775	30.0977	106.943	145.711	25.1566	0	14.8878	116.076	240.545	122.823	36.2502	27.578	0	0	0	81.7825	25.6103	59.5617	0	0	0	0	12.0731	14.0221	31.5969	32.4821	14.5753	63.4326	14.4127
TG(45:3)+Cl-35	793.607	0	0.1875	0.25	0	0.625	8.56141	5	224.787	248.226	311.96	200.639	384.564	392.798	286.537	544.181	224.431	262.125	262.006	287.918	306.966	259.219	264.791	470.531	9.56654	0	13.8373	0	36.1796	8.84549	13.0004	6.95251	5.22547	0	12.7697	8.56859	13.4414	7.57285	31.569	0.339374	6.34915	7.41771	6.17014	0	0	8.77308	14.1627	5.64525	0
TG(45:4)+Cl-35	791.591	0.625	0.8125	0.5625	0.5	0.4375	7.17468	4	0	9.22782	0	0	0	0	0	8.09132	0	0	0	0	8.13059	6.95042	5.68536	7.49835	0	0	0	0	0	0	0	6.17708	0	4.03591	16.8792	0	0	0	0	0	4.42528	0	0	4.6417	0	14.5682	0	0	7.70593
TG(46:0)+Cl-35	813.67	0	0	0	0	0	6.29801	5	3826.35	7173.62	4676.3	3384.25	3888.8	6627.24	4600.95	6479.11	6185.73	5928.17	7222.65	6047.03	4821.5	3764.82	7157.36	7909.75	2882.34	52.7484	4820.74	8108.23	10074.9	8939.86	5359.56	4789.11	1916.92	2798.98	1249.57	6749.07	3160.47	6105.64	2676.05	3135.21	3626.4	3232.59	4010.66	4251.41	4077.91	4978.27	2668	6405.17	4090.76
TG(46:0)+Cl-37 & TG(45:4)+Acetate	815.667	0	0	0	0	0	4.73324	5	985.302	1827.48	1175.39	897.82	1014.49	1624.48	1092.86	1677.89	1554.95	1580.11	1816.79	1429.33	1200.63	888.735	1824.92	1942.62	673.274	8.59091	1126.86	2098.97	2595.06	2318.89	1261.58	1281.05	424.04	729.569	146.047	1665.84	755.046	1466.65	619.327	819.994	945.942	833.406	1044.18	1063.17	997.875	1267.49	686.735	1680.35	948.582
TG(46:1)+Cl-35	811.654	0	0	0	0	0	5.87165	5	4257.23	7311.83	5495.88	3893.14	4479.49	7352.08	5076.23	7192.04	6508.44	6768.21	8043	6720.55	5989.33	4271.17	7540.62	8328.33	3674.82	63.6447	4106.69	8576.39	10778.6	9310.92	5456.67	5124.26	1968.85	2641.11	1541.33	6595.69	3797.32	6682.64	2686.69	3414.43	3770.42	3262.32	3961.21	5002.37	4893.79	6119.03	2706.62	6829.55	4352.09
TG(46:3)+Cl-35	807.623	0	0.0625	0	0	0	4.70346	5	517.484	777.684	679.418	504.356	655.61	904.56	701.493	1029.93	724.416	736.409	941.547	786.074	744.717	533.426	926.856	957.241	234.203	0	242.393	884.519	1090.24	930.858	439.829	371.185	72.3672	143.682	19.8138	570.943	311.118	586.721	110.475	152.955	256.069	93.6956	236.69	452.524	426.979	551.872	98.0304	609.012	251.824
TG(46:4)+Cl-35	805.607	0	0.25	0.25	0	0.625	4.9902	5	9.39653	99.9508	50.6195	25.1215	18.6658	34.7958	50.2296	92.7146	30.608	88.1885	98.5242	67.9074	38.6906	31.5564	79.3774	103.381	11.0622	5.91702	0	113.951	161.918	106.365	8.47439	25.5665	0	0	0	5.93961	21.2873	37.1192	9.75632	14.674	0	10.418	0	34.075	42.3646	23.8153	6.99677	40.3602	0
TG(46:8)+Cl-35	797.544	0	0.0625	0.375	0	0.125	4.61318	5	79.2427	197.907	168.64	103.721	178.931	227.371	101.133	354.912	114.097	157.963	163.743	118.67	183.948	120.918	175.879	196.941	14.4279	0	12.7941	21.7036	34.0785	7.88056	7.81694	16.4661	30.3851	18.6532	26.3969	12.716	30.2272	22.2185	18.1472	25.6293	5.62027	5.58448	7.99693	0	14.4981	6.81579	4.00323	7.37051	0
TG(47:0)+Cl-35	827.685	0	0	0	0	0	5.9619	5	645.381	1405.27	950.99	646.257	774.189	1229.66	825.972	1325.63	1076.74	1121.12	1473.95	1138.9	1033.2	732.215	1386.06	1688.22	486.962	5.13384	875.302	1634.06	1964.46	1664.82	971.254	932.271	248.405	493.716	99.4383	1326.6	627.072	1162.87	418.128	486.122	635.352	642.019	728.386	857.2	766.669	989.659	496.375	1260.05	782.864
TG(47:1)+Cl-35	825.67	0	0	0	0	0	5.84768	5	652.597	1174.66	757.956	591.959	668.006	1148.2	779.307	1201.33	1038.18	1086.85	1243.5	1069.29	911.633	509.778	1237.52	1347.18	468.559	4.54423	652.987	1319.39	1673.52	1499.74	857.079	740.611	117.137	359.307	35.9257	1029.4	560.529	1063.74	361.789	352.659	575.505	473.89	582.993	844.087	744.668	994.845	369.467	1220.04	641.335
TG(47:3)+Acetate	845.713	0	0.25	0	0	0.5	5.32266	5	55.4742	251.652	69.0089	87.1296	86.5328	225.214	74.8206	224.283	225.887	178.989	252.38	177.301	78.9498	33.445	237.305	292.433	0	0	27.3438	313.12	483.993	300.22	157.694	102.743	0	38.8783	31.3225	209.238	50.4442	93.3721	31.1213	0	23.2918	28.1584	35.9524	44.017	73.6241	111.282	29.0195	216.433	52.8969
TG(47:5)+Cl-35	817.607	0.6875	0.875	0.875	0.8125	1	7.43181	1	0	0	7.85371	0	0	0	0	6.75452	0	0	0	7.88491	0	14.9757	0	12.6766	0	0	0	0	0	0	0.324109	0	0	0	14.294	0	0	0	0	0	0	0	0	0	6.56829	0	0	0	7.72682
TG(48:3)+Acetate	859.729	0.1875	0.375	0.4375	0.375	0.625	8.06036	5	0	8.77708	4.29295	4.42465	0	2.79207	17.7604	7.85416	8.14773	19.7211	14.5988	6.70936	0.152564	0	8.18978	71.5938	0.349961	0	5.98343	6.25312	54.2063	30.3442	7.74788	0	0	0	5.30981	10.5683	0	6.6692	0	10.7262	7.32862	0	0	0	0	11.6578	2.52877	5.54474	0
TG(48:9)+Cl-35	823.56	0	0.4375	0.625	0	0.5	7.93984	5	8.9759	20.657	6.99029	11.8517	30.147	52.2494	35.598	87.6622	9.29228	13.1611	26.7474	35.5634	47.9064	27.9414	27.6963	23.2002	0	0	8.42328	0	15.5686	0	0	0	0	5.82261	20.3738	8.49185	0.239458	9.27699	13.8823	5.89038	0	6.36006	4.46227	0	0	9.07307	0	6.14313	0
TG(49:0)+Cl-35	855.717	0	0	0	0	0	6.28955	5	537.198	1143.16	693.168	582.639	606.907	1103.73	617.85	1124.91	1055.94	1016.65	1262.23	1064.42	729.345	565.3	1227.63	1448.71	355.839	6.3298	746.666	1268.17	1715.22	1422.6	790.382	749.604	225.484	373.982	59.0433	1026.72	485.299	885.422	369.086	353.749	373.803	454.444	560.237	667.922	508.491	813.188	365.623	941.648	548.33
TG(49:1)+Cl-35	853.701	0	0	0	0	0	4.31445	5	1363.99	2676.29	1846.83	1357.5	1442.97	2535.89	1606.99	2682.84	2270.35	2441.22	2848.03	2360.69	1865.18	1439.6	2674.4	3052.04	1173.29	9.39514	1456.81	2957.42	3738.71	3213.86	1849.88	1733.46	635.865	908.983	352.266	2173.65	1306.21	2072.84	952.405	1108.98	1383.19	1137.48	1362.23	1668.65	1587.75	2122.77	987.621	2338.16	1473.93
TG(49:3)+Cl-35	849.67	0	0.125	0.1875	0	0.4375	7.04776	5	319.874	473.651	563.57	461.273	506.25	656.901	555.315	932.824	465.868	454.79	419.933	562.878	645.662	402.778	528.183	735.388	14.1229	2.60903	8.08709	72.681	164.334	152.469	49.8159	74.1299	15.1418	5.9945	0	19.5894	0	25.7256	40.3045	12.5151	9.136	0	13.3959	26.2709	14.9071	22.0887	4.32142	49.7382	7.52772
TG(50:1)+Cl-35	867.717	0	0	0	0	0	3.94945	5	10859	20611.5	14056.9	10096.2	11082.3	19512.4	12257.9	20675.6	17427.8	18718.1	22282.6	18241.2	14738.2	10717.1	21251.6	24283.9	9150.33	164.251	12392.4	23280.9	30164.5	25001	14872.1	13684.7	5473.18	7307.29	3752.53	17503.8	10277.5	16409.8	7505.57	8140.14	10132.3	9335.77	10821.9	13739.2	12635.9	17870.7	8182.3	19212.6	12470.8
TG(50:11)+Cl-35	847.56	0.9375	0.75	0.875	1	0.625	7.3448	1	0	0	0	0	0	0	0	3.44633	0	0	0	0	0	0	0	0	7.85767	0	0	0	0	7.00881	8.43581	0	9.57813	0	0	0	0	0	0	0	0	0	0	0	0	0	0	0	0
TG(50:2)+Acetate	889.776	0.875	0.5625	0.4375	0.75	0.375	8.30348	3	0	0	0	6.11019	0	0	8.71913	0	0	0	0	0	0	0	0	0	8.54388	0	0	0	0	0	17.3532	0	13.9673	0	0	14.3129	7.26959	19.31	8.02623	0	0	0	9.80361	2.95255	0	4.90346	10.6584	0	12.3651
TG(50:4)+Cl-35	861.67	0	0.0625	0	0	0.0625	5.28012	5	255.504	753.154	391.008	258.605	308.526	561.45	280.928	716.647	511.23	622.456	766.475	610.624	446.229	325.762	700.939	901.072	218.733	0	223.827	831.076	988.506	829.438	393.038	291.66	8.90133	57.2319	8.73639	499.529	290.524	441.32	98.9969	145.924	187.546	113.675	168.346	335.501	335.243	511.941	115.762	619.464	205.242
TG(50:5)+Cl-35	859.654	0.125	0.4375	0.1875	0	0.5	4.65918	5	21.2567	77.6805	20.0946	14.4727	38.6554	75.0179	0	75.7516	38.9817	144.879	51.3343	68.1581	0	9.17916	101.754	119.754	0	6.78532	0	120.3	222.087	111.769	29.3137	16.831	0	0	0	21.0883	22.7911	68.1929	0	0	9.89689	0	0	20.4164	9.58376	46.6202	11.9848	34.8918	20.7148
TG(51:1)+Acetate	905.807	0.875	0.375	0.4375	0.75	0.1875	5.77067	3	0	7.74278	6.89094	0	0	0	0	0	0	0	0	0	0	0	0	0	25.5174	0	10.2026	0	0	14.1306	0	7.26454	10.8353	7.75531	0	13.4693	15.5846	7.95928	0	9.38428	15.83	46.5942	0	0	7.43825	4.55132	0	0	16.0357
TG(51:1)+Cl-35	881.732	0	0	0	0	0	5.44326	5	1086.55	2194.46	1491.33	1055.43	1251.82	2103.35	1335.65	2296.89	1911.61	1964.77	2410.41	1987.26	1625.61	1200.66	2257.55	2766.06	979.001	4.26144	1247.19	2468.72	3160.9	2780.72	1526.75	1416.92	505.152	699.113	279.222	1843.42	1114.97	1787.44	788.23	818.186	1079.63	944.042	1095.35	1552.05	1329.87	1990.78	913.555	1895.93	1285.79
TG(51:2)+Acetate	903.792	0.875	0.75	0.5625	0.875	0.375	7.80287	2	0	0	7.30429	0	0	0	8.9949	0	0	0	0	0	0	0	0	0	0	0	13.0702	0	0	0	0	7.97646	8.65819	5.55781	0	0	0	0	0	0	9.94504	8.89948	5.80043	0	9.41062	0	5.86277	0	0
TG(51:2)+Cl-35	879.717	0	0	0	0	0	5.19997	5	940.753	1687.31	1146.79	878.969	1003.55	1659.85	1126.93	1669.56	1470.18	1591.09	1748.1	1508.2	1420.97	884.83	1843.27	2097.39	798.007	4.46343	865.549	1893.5	2583.23	2058.21	1225.29	1083.13	303.109	548.028	162.197	1423.57	861.182	1364.5	581.213	686.27	776.807	626.123	863.757	1187.66	1055.82	1407.67	675.521	1491.89	902.072
TG(51:3)+Cl-35	877.701	0	0.0625	0	0	0.4375	4.33161	5	136.943	423.439	140.087	84.4917	140.376	306.783	149.24	511.76	283.707	325.68	460.717	377.134	263.479	58.9942	434.179	525.329	60.0263	2.59455	81.5439	543.994	660.811	550.332	237.618	192.011	9.62903	45.0786	0	289.941	117.338	181.159	39.1867	8.47621	83.2382	49.9179	61.3778	221.001	122.08	273.932	37.2593	326.087	96.304
TG(52:1)+Cl-35	895.748	0	0	0	0	0	4.2738	5	5961.44	11364.2	7869.86	5840.35	6100.61	10674	6735.71	11812.3	9512.01	10432.1	12421	9893.71	7769.13	5760.5	11428.4	13693.4	4812.01	93.1992	6476.89	12537.1	16462	13971.4	8080.37	7473.19	3059.71	3875.63	1992.11	9409.26	5795.82	8855.14	4269.55	4387.21	5552.4	5094.39	5983.83	7717.21	6759.53	9707.98	4689.38	10419.8	6647.09
TG(53:0)+Acetate	935.854	0.875	0.1875	0.375	0.6875	0	6.54864	4	0	0	0	14.4311	0	0	0	0	6.81932	0	0	0	0	0	0	0	32.2494	0	34.924	14.3984	0	7.3655	0	6.25975	12.5354	13.9427	30.1844	7.34888	5.90046	14.7128	16.2935	0.0471477	27.3638	23.1652	15.2196	0	0	0.282006	17.7782	17.9141	18.0023
TG(53:0)+Cl-35	911.779	0	0.0625	0	0	0.1875	8.8174	5	22.5529	110.528	91.2477	43.6342	67.7545	143.772	62.96	188.037	129.551	107.862	122.09	105.496	82.9813	46.3679	150.362	194.202	41.3878	0	42.0831	148.573	1921.13	1740.36	124.315	72.9119	8.32792	35.4859	0.437409	109.547	57.4923	148.25	17.9586	49.5621	13.4125	14.7295	39.2971	57.4786	49.2527	136.459	62.3151	118.727	49.0815
TG(53:2)+Acetate	931.823	0.6875	0.1875	0.1875	0.625	0.25	7.42555	5	0	0	7.96491	0	0	0	9.06237	0	5.78114	0	0	0	6.83515	7.01851	0	0	21.0818	0	35.3762	6.57317	0	0	7.4806	13.6828	24.928	43.6112	12.6663	21.4661	12.5691	28.6211	23.2347	20.1027	40.7853	13.5454	18.3845	9.76915	10.0904	8.72159	22.1714	16.3599	17.9441
TG(53:2)+Cl-35	907.748	0	0	0	0	0.0625	4.04405	5	496.457	964.286	659.464	467.52	458.983	946.94	629.749	999.628	873.577	986.673	1112.84	814.251	702.435	470.605	1092.76	1289.96	407.285	6.86774	427.647	1147.08	1420.59	1172.55	655.768	537.325	102.445	235.566	23.3986	780.243	521.055	771.391	182.055	275.458	412.475	247.241	439.181	649.806	520.972	867.817	296.881	821.604	535.579
TG(53:3)+Cl-35	905.732	0	0.125	0	0	0	5.22416	5	132.668	312.944	218.928	147.043	148.779	373.115	121.497	490.626	366.908	389.602	498.067	283.182	234.579	62.3754	458.83	596.43	38.9045	0	105.025	530.97	644.35	557.793	251.132	184.756	0	62.6459	6.86674	255.988	110.121	263.511	61.9345	68.9339	81.9603	42.6582	63.8083	179.118	152.59	282.661	72.4419	337.741	125.262
TG(53:5)+Cl-35	901.701	0.5625	0.5	0.3125	0.4375	0.875	6.81316	4	0	20.6291	0	0	0	8.64504	0	0	0	22.5314	0	11.1232	8.38867	0	17.863	29.9639	0	0	9.42117	0	44.7651	21.3817	11.8078	15.532	0	0	0	8.70233	8.64494	8.40817	0	0	0	0	8.31562	8.63804	7.99362	12.8772	14.4355	4.62361	7.38175
TG(54:0)+Cl-37 & TG(53:4)+Acetate	927.792	0.0625	0.1875	0.125	0.125	0.375	5.68247	5	0	51.5328	9.64868	14.0053	5.53995	28.2624	8.30441	8.85857	34.677	12.1292	31.8314	21.8812	26.9882	23.013	20.0334	43.8901	9.62841	0	9.19812	26.1457	45.6458	60.7324	22.9817	15.4154	5.17096	25.1631	0	62.2552	31.3166	9.53605	0	16.3427	11.3031	9.01896	15.3207	24.8025	26.4351	5.82349	20.3871	28.4344	29.5606
TG(54:1)+Cl-35	923.779	0	0	0	0	0	4.39715	5	1083.44	2160.08	1414.72	1055.76	1056.51	2020.35	1195.77	2288.5	1817.36	1995.94	2347.25	1916.88	1400.79	1003.18	2128.21	2641.87	797.445	6.96266	1306.39	2156	3112.42	2333.42	1376.55	1307	435.909	664.26	219.277	1694.58	1047.5	1569.09	688.068	698.097	946.729	835.546	1081.39	1349.55	1260.27	1788.94	832.821	1770.04	1183.43
TG(54:2)+Cl-35	921.764	0	0	0	0	0	4.05554	5	2371.74	4462.72	2906.3	2157.92	2266.92	4205.23	2658.78	4768.63	3919.52	4015.75	5011.97	3936.65	3130.02	2280.95	4665.92	5524.77	1908.16	27.1263	2421.21	4877.2	6390.92	5268	3010.8	3006.93	1130.3	1472.48	762.868	3505.15	2290.55	3273.69	1614.72	1728.49	2174.03	1853.51	2202.18	2946.31	2604.55	3963.23	1693.71	3960.52	2573.43
TG(54:6)+Cl-35	913.701	0	0.0625	0	0	0.375	4.104	5	72.1539	188.292	125.674	60.9975	49.2536	183.893	73.6616	254.753	129.739	195.144	279.172	166.684	99.2964	30.6738	246.299	378.75	24.9635	8.40411	17.5614	279.513	393.243	329.771	105.277	88.0076	10.9486	33.2831	9.67447	90.2948	33.2326	142.951	0	38.4821	42.3056	13.9118	9.24203	128.727	87.3816	178.159	39.3214	194.357	38.2624
TG(55:2)+Acetate	959.854	0.875	0.125	0.1875	0.25	0	6.73713	4	0	0	0	0	0	0	6.12364	0	5.46509	0	0	0	0	0	0	0	41.4629	0	84.8555	11.8248	0	8.84086	15.0337	32.5819	45.4138	24.7143	37.172	11.2403	14.5263	23.6654	18.1816	35.2724	73.83	72.8961	39.5234	10.0349	10.9137	36.5354	24.0703	27.5562	24.492
TG(56:1)+Cl-35	951.811	0	0.125	0	0	0.25	4.51854	5	110.526	175.472	25.5883	44.2361	22.9683	128.5	58.1461	262.64	146.411	189.045	302.67	195.552	107.981	32.6007	215.77	286.686	33.0178	0	73.0733	280.681	403.048	307.602	77.5169	56.8383	0	49.2082	7.30312	129.553	34.8138	95.9778	17.582	36.2649	39.3735	49.7215	35.3628	102.611	55.5689	195.088	67.378	110.922	101.866
TG(56:1)+Cl-37 & TG(55:5)+Acetate	953.808	0.1875	0.25	0.125	0.25	0.625	6.96595	5	6.71803	16.0629	0	4.55634	0	29.2996	0	28.5356	18.9494	16.9009	40.0167	2.13131	7.64983	9.59388	34.9557	55.6184	0	0	24.1952	20.7916	63.3096	39.2647	21.9492	8.12287	13.7855	7.82088	13.2266	35.505	0	16.4515	0	16.9476	0	16.2356	14.2752	23.4338	12.3879	24.6217	5.85326	25.74	12.5263
TG(56:10)+Cl-35	933.67	0.5625	0.625	1	0.5	0.625	7.51961	4	0	0	0.589303	0	0	0.252906	0	0	0.453145	0	0.0882072	0	0.325311	0.229838	0	0.268671	6.10313	0	0	0	0	0	0	8.46934	0	0	6.69668	0	0	5.64617	1.88677	7.70933	0	0	0	0	0	0	0	0	0
TG(56:6)+Cl-35	941.732	0	0	0	0	0.375	4.68088	5	33.6369	120.754	74.6804	76.4468	54.8254	108.965	44.692	180.241	104.029	151.624	202.937	123.138	48.8308	25.2772	149.082	247.521	15.6577	6.65306	60.9825	170.049	335.599	190.016	69.9082	89.1877	28.1131	9.79496	18.5855	97.1063	54.9393	129.134	24.268	28.674	31.906	23.966	41.9331	60.3248	65.5132	121.239	85.8567	142.219	22.5412
TG(56:7)+Cl-35	939.717	0.1875	0.1875	0.25	0.0625	0.5	5.58603	5	9.83709	7.82133	0	5.54053	0	7.73515	7.51769	20.6237	30.1509	8.46893	24.4121	16.8723	0	8.27746	16.7961	22.422	0	3.22416	7.98649	53.1332	33.3709	28.0308	0	9.82267	0	3.56489	11.0362	7.15577	6.84668	20.0196	8.26736	14.8185	7.65513	11.5682	21.3602	8.99564	0	7.36652	6.67265	17.2736	0
TG(57:1)+Cl-35	965.826	0	0.125	0.125	0.125	0.1875	4.86453	5	8.20611	35.8249	6.11739	13.9583	9.52986	12.6225	15.6928	30.1399	28.8096	15.2814	31.5107	30.2394	10.2205	9.14696	31.2389	23.7565	9.74894	0	9.88015	39.3742	121.597	78.6931	17.1949	19.0916	0	23.7465	5.3731	14.4371	7.34348	23.0036	18.5007	14.9058	18.0527	10.3762	10.4067	12.9044	11.4566	16.7335	10.7533	20.405	36.5451
TG(57:5)+Cl-35	957.764	0.75	0.5	0.375	0.875	0.25	6.70496	3	0	11.8032	4.46684	4.39276	0	0	0	0	7.31849	0	0	0	0	0	0	0	0	0	19.2458	0	8.63937	8.33584	8.34037	0	0	5.94182	0	5.76397	21.882	7.38409	0	0	0	19.4363	7.91137	0	0	3.56034	0	5.84471	12.9049
TG(58:4)+Cl-35	973.795	0.875	0.25	0.1875	1	0.125	6.94833	3	3.82086	211.228	0	0	0	0	0	0	0	0	0	0	0	0	0	0	8.91002	0	29.8239	0.0239458	0.410444	0	0	30.9159	21.3252	7.69692	0	16.29	15.9888	10.1871	4.6702	8.57222	4.6602	18.2341	13.6083	0	11.5961	0	24.4575	17.6934	16.9576
TG(58:5)+Cl-35	971.779	0.8125	0.25	0.125	0.5	0.25	6.75689	4	0	0	0	0	0	0	10.5235	6.57411	0	0	0	0	7.74914	0	0	0	0	0	24.9953	0	5.68386	27.437	13.7735	5.26549	9.42082	21.9988	8.2141	27.5793	6.28263	21.4382	0	22.1427	32.5599	28.6305	0.468344	11.8121	0	4.80935	13.5145	26.8673	24.0427
TG(59:11)+Cl-35	973.701	0.5	0.5625	0.3125	0.625	0.375	8.07688	5	6.03046	0	16.2366	4.40733	0	0	0	23.7593	0	9.65547	0	0	12.5094	0	11.3047	8.42643	0	0	0	5.07668	38.6063	13.6183	0	0	0	6.98862	25.2616	0	0	12.4944	0	5.12923	7.84064	0	0	0	0	4.34397	12.1109	5.60293	4.72017
TG(59:7)+Cl-35	981.764	0.9375	0.25	0.3125	0.6875	0.375	6.10676	4	0	0	0	0	0	0	3.14575	0	0	0	0	0	0	0	0	0	4.63772	0	14.0712	0	0	11.3282	6.95153	10.1952	33.8187	22.7742	18.9546	7.47289	7.21127	11.959	0	36.7561	21.6818	0	7.61195	0	9.24012	8.98719	16.9685	10.0951	16.0261
TG(59:8)+Cl-35	979.748	0.75	0.25	0.1875	0.625	0.3125	6.35197	4	0	0	0	0	0	0	13.8823	0	7.99017	0	0	0	7.8454	5.46309	0	0	11.9753	2.3902	32.3408	0	0	7.26162	19.5328	0	12.9692	19.0604	9.97393	13.8	13.9368	27.6694	0	35.1766	8.57818	16.2597	20.5842	0	14.9161	0	17.6791	8.1184	12.5528
TG(60:1)+Cl-37 & TG(59:5)+Acetate	1009.87	0.9375	0.25	0.625	0.8125	0.1875	5.73093	3	9.17997	0	0	0	0	0	0	0	0	0	0	0	0	0	0	0	0	0	12.674	15.2872	4.86858	8.68503	0	10.0596	10.805	9.55242	16.4405	10.1906	11.9398	0	14.804	20.4126	28.6893	12.8943	13.376	0	0	0	0	5.2125	0
TG(60:14)+Acetate & PI(46:0)	1005.74	0.75	0.375	0.25	0.8125	0.1875	6.42845	3	0	8.86395	0	0	0	8.16952	0	9.85979	0	0	0	0	12.0725	0	0	0	8.149	0	21.466	0	0	0	4.18893	28.4355	0.310109	7.94374	0	9.9857	5.59471	8.25104	0	16.3757	12.8093	12.8224	0	0	5.2366	5.77057	7.09565	16.7135	11.9699
TG(60:7)+Cl-35	995.779	0.8125	0.3125	0.5625	0.8125	0.3125	5.31245	3	0	0	0	0	0	0	0	0	5.52956	0	0	0	0	7.59876	6.39036	0	0	0	7.04825	6.62553	5.13438	0	0	21.3211	16.5953	10.9875	10.1468	10.8498	22.3901	13.6909	0	10.5597	0	5.011	8.78189	0	0	0	5.18506	0	5.61092
TG(60:9)+Cl-35	991.748	0.875	0.1875	0.1875	0.9375	0.3125	7.05074	3	0	7.82603	0	0	0	0	0	0	0	0	0	0	0	0	0	8.94079	14.4531	0	25.5303	7.54292	5.71018	6.47652	19.805	0	7.1812	13.0308	0	10.5041	4.52409	8.75974	9.20065	26.7064	13.8618	17.7398	11.4453	0	0	10.4043	12.5743	15.1397	38.4929
TG(61:7)+Cl-35	1009.79	0.875	0.5625	0.125	0.8125	0.3125	6.53859	3	0	0	0	6.9782	5.56172	0	0	0	0	0	0	0	0	0	0	0	17.9414	0	13.0942	0	0	0	8.93837	0	0	4.87141	0	0	6.96947	19.9527	25.4888	0	12.8586	8.69963	9.99438	0	0	9.6123	17.1386	7.99075	13.3122
TG(62:11)+Cl-37 & PI(47:1)	1017.75	0.9375	0.4375	0.4375	0.5625	0.625	5.87185	4	0	0	0	0	0	0	0	0	0	0	0	0	0	4.71404	0	0	10.3501	0	0	9.31091	0	7.7047	0	0.596939	0	0	17.7324	15.9309	8.51928	5.68105	0	9.14104	15.1162	16.0899	5.02228	0	8.7191	4.46412	0	0	4.99506
TG(62:14)+Cl-35	1009.7	0.8125	0.875	0.75	0.75	0.6875	7.18587	1	0	0.351056	0	6.0511	0	0	0	0	0	0	0	0	8.35789	0	0	0	0	0	0	0	0	0	11.1248	0	0	0	9.49768	0	0	0	0	0	0	7.78884	18.6093	0	0	0	0	0	0
TG(62:2)+Cl-37 & TG(61:6)+Acetate	1035.89	1	0.5625	0.8125	1	0.125	6.32924	2	0	0	0	0	0	0	0	0	0	0	0	0	0	0	0	0	12.215	0	12.6572	0	0	0	0	0	0	8.99293	16.0438	10.4253	10.5289	5.304	0	0	0	18.0015	0	0	9.87845	0	0	0	0
TG(62:5)+Cl-35	1027.84	0.9375	0.5625	0.625	0.8125	0.0625	5.21033	3	0	0	0	0	0	0	0	0	5.58153	0	0	0	0	0	0	0	5.73669	0	4.94767	0	0	8.61629	0	0	10.1187	10.2436	0	0	0	23.4469	0	10.389	14.2041	7.97795	5.64057	0	0	0	5.64287	0	10.431
TG(62:5)+Cl-37 & TG(61:9)+Acetate	1029.84	1	0.75	0.625	1	0.5	5.25916	2	0	0	0	0	0	0	0	0	0	0	0	0	0	0	0	0	0	0	9.81306	0	0	0	0	0	7.8511	6.43035	0	0	0	6.44995	0	0	0	0	4.05943	0	0	7.76965	14.6325	0	7.82029
TG(62:6)+Cl-35	1025.83	0.875	0.5625	0.75	0.875	0.3125	7.63714	2	0	0	0	0	0	0	8.95511	0	0	0	0	0	17.3848	0	0	0	0	2.62419	37.7061	0	0	0	0	27.0221	7.79067	17.3366	11.5606	0	0	0	0	9.51817	6.21424	0	8.67621	0	0	0	11.9308	0	0
TG(62:7)+Cl-37 & TG(61:11)+Acetate	1025.81	0.875	0.375	0.5	0.9375	0.25	6.24285	3	0	0	0	0	0	0	8.95511	0	0	0	0	0	17.3848	0	0	0	5.84023	2.96709	37.7061	0	0	0	4.56803	27.0221	0	14.5925	11.7909	9.18263	0	5.68257	0	8.8037	9.08808	0.100774	8.78711	0	5.04266	0	11.9308	0	9.1168
TG(62:9)+Cl-35	1019.78	1	0.625	0.6875	0.875	0.5	5.2837	3	0	0	0	0	0	0	0	0	0	0	0	0	0	0	0	0	0	0	20.1413	0	0	5.50956	0	0	0	13.3512	10.2402	8.52433	0	0	9.80209	0	0	0	0	0	0	8.39451	12.0241	6.14922	0
TG(63:10)+Cl-35	1031.78	0.875	0.6875	0.875	0.875	0.5	6.39112	2	0	6.72152	0	0	0	0	0	0	0	0	0	0	0	0	9.39284	0	0	0	0	0	0	0	7.65594	11.0489	0	0	0	0	0	9.58837	11.8153	17.2073	0	0	9.09175	0	0	0	0	0	0
TG(63:10)+Cl-37 & TG(62:14)+Acetate & PI(48:0)	1033.78	0.9375	0.625	0.4375	0.8125	0.5625	6.80886	3	0	0	0	6.42082	0	0	0	0	0	0	0	0	0	0	0	0	0	0	10.193	0	0	0	9.0284	0	0	8.73082	0	0	8.50609	0	7.41538	6.47863	15.3346	13.7575	7.62003	0	0	0	0	8.14005	8.11048
TG(63:11)+Cl-37 & TG(62:15)+Acetate & PI(48:1)	1031.76	0.875	0.6875	0.875	0.8125	0.4375	7.85938	2	0	6.23469	0	0	0	0	0	0	0	0	0	0	0	0	3.52952	0	0	0	0	0	0	0	7.65594	5.56738	0	0	0	0	0	9.21492	11.8153	10.6374	0	0	0	0	0	0	4.68809	0	0
TG(63:8)+Cl-37 & TG(62:12)+Acetate	1037.81	1	0.5	0.4375	0.9375	0.1875	5.33081	3	0	0	0	0	0	0	0	0	0	0	0	0	0	0	0	0	0	2.82353	10.1419	14.2287	0	0	0	0	0	19.1169	4.56375	9.15203	0	0	5.72441	6.69169	20.8847	8.56528	0	4.83722	0	0	12.2986	0	14.8821
TG(63:9)+Cl-37 & TG(62:13)+Acetate	1035.79	0.8125	0.4375	0.375	0.875	0.375	5.99603	3	0	0	8.19729	0	0	0	9.48795	0	0	0	0	0	0	6.85038	0	0	11.5816	0	5.17486	16.724	0	0	9.21418	0	0	20.2772	9.20325	9.7645	0	18.5899	0	17.5535	17.6914	11.9451	25.1414	9.55667	0	14.7045	6.84292	6.63847	6.55534
TG(64:4)+Cl-37 & TG(63:8)+Acetate	1059.89	0.9375	0.625	0.5625	0.875	0.125	4.41473	3	0	0	0	0	0	0	9.43299	0	0	0	0	0	0	0	0	0	0	0	12.1518	0	0	0	5.21968	0	9.68998	6.49623	21.5241	0	0	0	0	9.18878	11.6713	7.84022	0	0	10.1695	0	6.75864	0	0
TG(65:11)+Cl-35	1057.79	0.875	0.8125	0.9375	0.6875	0.75	4.65646	1	0	0	0	0	10.4807	0	9.21312	0	0	0	0	0	0	0	0	0	7.9989	0	0	0	0	0	0	0	0	0	10.0055	0	0	0	0	0.357733	9.22822	0	0	0	0	0	0	0	0
TG(65:8)+Cl-35	1063.84	1	0.75	0.4375	1	0.1875	4.44338	2	0	0	0	0	0	0	0	0	0	0	0	0	0	0	0	0	0	0	0	0	0	0	0	8.8647	10.1451	0	0	0	14.8762	0	0	20.1537	12.5912	8.87276	20.7306	0	6.44621	0	0	0	6.01079
TG(65:9)+Cl-37	1063.82	0.9375	0.5	0.3125	0.9375	0.3125	5.99909	3	0	0	0	5.88979	0	0	0	0	0	0	0	0	0	0	0	0	8.92096	0	0	8.785	0	0	0	5.85463	15.8821	0	0	6.76527	12.4528	0	9.85423	7.47148	29.1021	3.67118	5.40645	0	9.2423	6.42569	6.49054	4.26967	7.34271
TG(66:0)+Acetate	1118.06	0.875	0.5625	0.3125	0.625	0.4375	5.62633	4	6.3159	0	0	6.51982	0	0	0	0	0	0	0	0	0	0	0	0	6.29198	0	7.91454	0	7.78793	0	15.5829	8.60963	0	20.4557	0	0	0	0	8.26547	0	0	7.51144	24.898	0	8.72104	5.93783	14.3925	17.3654	6.31172
TG(67:0)+Acetate	1132.07	0.75	0.3125	0.3125	0.375	0.1875	4.83212	4	15.4242	0	9.19772	0	0	0	0	0	6.23883	0	0	0	0	8.32305	0	0	6.82247	2.43016	16.8975	0	6.60566	0	11.3704	8.09921	0	19.8429	0	14.5875	7.43216	28.2519	0	5.69719	14.0666	16.2321	7.10635	0	14.1865	18.324	13.1039	11.9562	21.865
TG(67:1)+Acetate	1130.06	0.9375	0.375	0.5	0.625	0.125	4.71749	4	0	0	0	0	0	0	8.95438	0	0	0	0	0	0	0	0	0	0.436345	2.79574	0	7.16237	11.8284	0	12.4024	0	9.50553	16.2732	22.6393	0.0518868	0	6.50951	0	0	12.862	0	0	0	0	0	0	13.0191	8.9335
TG(67:5)+Cl-35	1097.92	0.875	0.5625	0.5625	0.9375	0.0625	4.42333	3	0	0	0	0	0	0	0	0	0	5.20371	0	0	0	0	7.03758	0	0	0	12.136	9.15198	0	0	0	0	0	16.941	34.5181	6.5899	8.13315	0	0	6.80168	14.3232	12.0108	22.2215	0	0	0	8.28838	16.2776	15.2403
TG(68:0)+Acetate	1146.09	0.75	0.25	0.0625	0.4375	0.25	5.66495	4	0	0	0	0	0	0	8.56748	7.79942	4.88618	0	0	0	0	4.6256	0	0	19.1791	0	26.9005	9.8071	0.618132	0	19.279	24.5919	0	27.7521	11.6342	47.8508	29.3276	18.7751	0	8.18408	18.6959	20.2363	9.80888	13.6023	17.7938	0.00858649	14.5941	6.83052	7.01563
TG(68:1)+Acetate	1144.07	0.8125	0.4375	0.3125	0.375	0.3125	7.15235	4	0	0	0	7.80395	0	0	7.37368	0	0	0	0	3.06177	0	0	0	0	5.78773	0	0	0	0	9.86546	6.82961	5.81921	5.74474	6.31349	0	0	18.5138	16.2391	0	11.1372	28.8073	4.956	18.8789	0	9.71753	0	8.30677	27.1495	15.1533
TG(68:6)+Cl-35	1109.92	1	0.625	0.6875	0.875	0	5.89365	3	0	0	0	0	0	0	0	0	0	0	0	0	0	0	0	0	18.9331	0	9.58209	0	0	0	0	0	10.0958	11.0279	7.09353	0	0	0	0	45.8164	0	0	8.74381	9.72456	0	0	8.46892	0	0
TG(69:0)+Acetate	1160.1	0.5	0.0625	0.0625	0.25	0.1875	5.66	5	0	16.4484	0	11.4321	0.0563439	0.455674	0	9.21799	9.25253	0	7.88505	0	0	0	0	8.22665	14.5929	0	11.7728	14.2086	10.5277	22.2781	32.1799	8.40096	16.0624	40.4136	26.4765	32.1563	27.1669	17.3265	8.75629	49.0397	22.092	41.1114	32.4048	6.23925	18.5975	0.222818	28.9188	29.2017	29.0792
TG(69:1)+Acetate	1158.09	0.625	0.1875	0.1875	0.4375	0.25	4.2325	5	0.150975	0	11.9546	0	0	0	8.20069	8.54614	0	0	0	8.55224	0	0	3.16592	0	13.8696	0	53.3511	0	4.75696	46.804	4.91174	19.7002	13.4354	34.6163	20.5715	10.2445	40.3288	45.6699	0	17.5256	23.2321	53.1124	38.7281	17.5129	10.9747	16.229	12.8406	26.7006	41.2402
TG(70:1)+Acetate	1172.1	0.6875	0.25	0.1875	0.3125	0.1875	4.4683	5	7.90299	0	0	0	8.2898	9.27973	19.023	0	7.93798	0	0	0	0	0	0	0	8.69456	0	23.6264	8.58182	16.9327	10.8587	7.35678	0	7.81533	7.12319	0	8.64688	0	43.3554	38.7011	24.4765	32.4726	14.6765	14.133	9.81345	8.34073	0	19.3793	14.574	40.927
TG_oxid(34:0)+Cl-37	663.473	0	0.3125	0.1875	0	0.8125	8.14869	4	64.2818	67.1446	148.721	28.1439	138.184	141.537	139.286	210.2	65.6728	124.604	166.627	124.977	129.597	77.8288	101.221	124.683	33.1483	2.51258	5.37737	21.1941	87.6702	109.789	16.7017	5.18825	0	0	0	33.7787	12.7834	16.907	0	0	11.7522	11.4277	0	20.4663	0	25.3206	4.9962	5.57347	8.76735
TG_oxid(36:0)+Cl-37	691.505	0	0	0	0	0.25	5.92476	5	512.394	742.197	810.912	592.428	769.549	925.646	742.712	1146.73	592.979	752.503	854.181	765.066	908.151	710.245	906.17	914.973	236.299	3.34113	217.632	554.092	781.695	685.518	441.046	365.073	105.082	81.5889	65.1217	311.282	236.974	471.494	100.291	129.165	46.2238	32.4552	124.166	160.496	113.528	186.465	19.7108	249.033	93.4135
TG_oxid(36:1)+Acetate	711.567	0.9375	0.6875	0.6875	0.8125	0.5	8.77953	3	0	0	0	0	0	8.02816	0	0	0	0	0	0	0	0	0	0	0	0	0	0	0	0	6.02872	0	19.3697	0	7.01572	0	0	0	8.0001	15.0217	3.35959	0	0	0	0	5.80064	0	10.8	0
TG_oxid(38:0)+Cl-37	719.536	0	0	0	0	0.0625	5.94423	5	693.652	976.66	1116.24	736.094	999.081	1237.97	1120.46	1440.04	869.29	1052.46	1118.12	1061.77	1157.67	895.723	1158.78	1174.44	440.651	4.30246	376.61	900.002	1199.96	1139.2	694.533	593.651	202.845	198.583	169.079	636.674	316.336	782.228	337.962	250.128	213.579	157.119	241.301	447.493	298.009	484.893	138.913	562.327	367.088
TG_oxid(39:0)+Cl-37 & TG_oxid(38:4)+Acetate	733.552	0.3125	0.1875	0.125	0.125	0	8.30979	5	0	7.99914	9.06519	0	8.05678	8.80112	0	8.25977	0	30.3384	8.48112	7.35787	0	26.9179	23.9227	31.7446	27.505	23.2257	39.9341	36.9626	29.8513	21.622	0	10.4733	0	11.7159	10.6016	8.63718	7.53993	8.17745	0	38.7583	20.5684	34.69	28.7864	8.38219	0	21.7183	8.94053	22.7994	27.1111
TG_oxid(40:0)+Cl-37	747.567	0	0.0625	0	0	0	5.90138	5	186.265	354.038	419.205	240.199	359.894	569.275	311.32	684.067	401.669	434.421	511.42	428.03	509.206	217.88	571.391	648.267	155.875	0	246.937	531.563	775.899	608.208	367.244	328.486	38.6687	66.2499	27.7379	359.988	205.532	430.29	116.392	172.49	83.5047	87.4895	146.648	307.392	220.541	261.954	79.7331	467.352	200.696
TG_oxid(40:3)+Cl-37	741.52	0	0	0	0	0.0625	8.4115	5	1083.93	1228.65	1407.22	1089.36	1406.76	1526.88	1431.24	2124.26	1163.5	1200.92	1444.71	1401.26	1482.24	1265.32	1458.15	1976.81	279.567	10.7524	185.566	428.836	631.426	437.634	315.174	340.098	207.916	109.668	114.758	220.989	335.545	257	339.276	132.443	60.2647	65.9099	106.295	269.874	103.508	33.3367	35.6216	104.665	37.044
TG_oxid(41:1)+Cl-37 & TG_oxid(40:5)+Acetate	759.567	0	0	0.0625	0	0	8.90989	5	10.1451	28.9925	12.5842	0.0252574	6.61975	0.255872	9.30795	22.1962	6.06486	7.85536	7.38996	9.69444	6.81388	0.344295	15.4812	36.0976	20.6934	3.79237	53.5876	6.47379	6.62519	16.6827	29.2977	16.8737	57.8617	66.9733	25.9071	18.7826	27.8748	35.5755	8.12983	71.4384	34.0072	60.9573	23.316	21.9883	19.591	24.5154	23.4772	22.9555	20.0318
TG_oxid(42:5)+Cl-37	765.52	0.0625	0.25	0.375	0	0.375	8.53041	5	6.17086	8.36249	4.35537	6.28117	25.6496	61.0247	0	103.855	32.1227	12.4025	31.756	52.7617	29.0753	14.8723	45.9285	34.3006	8.02668	2.75074	4.59799	0	6.78976	0	10.6224	0	10.7507	12.8602	17.1727	0	6.28412	4.0841	6.40476	11.6916	0.370528	6.19409	0	0	6.47988	0	10.3165	0	10.4443
TG_oxid(43:1)+Cl-37 & TG_oxid(42:5)+Acetate	787.599	0.1875	0.1875	0.1875	0.125	0.125	8.52634	5	12.9555	10.2159	9.52185	6.36859	10.5805	4.94223	0	31.1276	0	0	4.64073	8.0054	10.0327	9.29431	19.8991	15.5844	7.40526	12.3978	8.31403	17.8052	5.96199	5.44983	24.3052	0	0	7.84673	7.09205	12.4908	9.22269	8.66726	0	8.07743	0.189937	4.48169	0.435651	0	5.05557	21.0731	9.68955	8.03168	0
TG_oxid(46:0)+Cl-37 & TG_oxid(45:4)+Acetate	831.661	0	0.1875	0	0	0.625	6.48963	5	19.6413	55.1442	79.0936	45.8862	34.1631	118.046	57.4278	97.4429	86.2642	128.57	158.518	158.241	64.3597	17.9982	162.432	186.521	18.6568	0	48.7651	114.661	332.562	192.621	71.8349	43.4278	0	12.3983	0	110.152	31.1006	51.6052	13.4422	29.6341	20.9996	7.83781	19.0804	58.4658	48.1688	84.037	18.4978	74.3728	74.7315
TG_oxid(46:6)+Cl-37	819.567	0	0.375	0.6875	0	0.25	8.17891	5	14.9767	23.8532	23.2943	4.55698	38.1746	39.8312	24.2665	38.4881	16.1798	20.7384	9.28924	24.2538	33.9162	4.66396	17.066	23.644	9.7785	3.10328	0	5.93081	5.94941	6.93462	0	5.6373	31.0522	0	19.8511	0	0	0	7.50122	5.39869	0	8.39472	0	0	7.76595	8.18769	0	0	0
TG_oxid(48:0)+Acetate	881.77	0.4375	0.375	0.1875	0.3125	0.4375	6.36503	5	0.0994179	0	3.65296	0	0.249155	0	0	0.578693	0.00581929	0.000815453	0	0	0.0133213	0	0.051673	0.216995	7.67423	0	0	0.613721	1.2268	1.71851	0.169619	1.20288	0	0.00209601	19.7324	0.929248	0	0.753596	0	0	6.25493	4.86531	5.37562	0.538695	0	9.43642	0.0199565	8.63058	0.429354
TG_oxid(48:0)+Cl-37 & TG_oxid(47:4)+Acetate	859.692	0	0.1875	0	0	0.25	5.2359	5	53.4714	144.411	51.7066	66.7727	40.9285	108.195	76.7333	253.366	116.686	185.029	217.434	171.833	88.1374	123.752	237.365	318.494	44.661	0	148.436	260.822	438.182	323.278	112.825	95.8002	0	16.2457	0	123.123	18.2184	98.4574	18.2797	30.3366	20.9886	33.4831	36.2302	75.1458	60.9369	105.678	55.0481	147.139	98.5545
TG_oxid(50:0)+Cl-37 & TG_oxid(49:4)+Acetate	887.724	0	0.125	0	0	0.25	5.27956	5	38.4606	220.811	163.212	82.1151	83.0957	223.745	89.639	240.774	139.762	202.33	271.711	153.783	121.51	148.952	245.404	324.552	67.2106	0	82.2458	298.085	412.239	285.589	117.44	173.88	31.3805	55.4468	0	240.277	52.1713	152.997	41.5517	29.5898	103.32	37.6673	48.8386	132.836	57.5519	224.412	93.3535	229.485	46.0406
TG_oxid(50:10)+Cl-37	867.567	0.75	1	0.875	0.6875	0.375	5.26899	2	0	0	0	0.295311	0	0	0	6.70477	0	0	0	0	6.81001	0	5.42903	0	0	0	0	0	0	0	0	0	0	0	0	0	0	0	0	0	0	0	0	0	0	0	0	0	0.108938
TG_oxid(50:7)+Cl-37	873.614	0.6875	0.6875	0.875	0.875	0.9375	7.31693	2	0	6.79357	0	3.61948	0	0	6.00668	0	0	0	0	0	0	0	15.7593	8.5795	0	5.3733	0	0	0	0	0	0	4.01645	6.92331	8.91141	0	6.99992	0	0	0	0	0	0	0	0	0	0	0	0
TG_oxid(51:1)+Cl-37 & TG_oxid(50:5)+Acetate	899.724	0	0.1875	0.0625	0	0.4375	6.90522	5	4.18604	73.1495	44.0919	15.8718	30.656	57.0944	9.62718	91.3054	32.7574	72.4561	79.9442	53.9568	44.1898	25.2924	93.2332	109.072	6.05913	24.6052	21.9792	44.0368	136.13	67.2993	66.203	21.1352	0	10.4855	10.2206	27.899	29.789	47.6144	0	0	0	14.8174	7.7721	55.5608	7.73591	66.7228	4.26436	25.9564	23.1372
TG_oxid(51:2)+Cl-37 & TG_oxid(50:6)+Acetate	897.708	0	0	0	0	0.3125	7.79618	5	27.0905	63.7635	58.8785	18.4961	26.4932	97.0367	31.7426	107.681	36.6225	87.8341	80.8528	93.1505	89.9157	14.8182	80.9642	133.393	18.6021	21.2163	18.0411	92.0133	140.18	79.6028	39.6031	25.134	0.655325	0.411642	23.2833	32.3848	27.08	51.6783	11.0141	44.1345	6.63321	28.3424	5.57302	24.6417	15.3507	34.3057	0.657906	27.4528	16.1189
TG_oxid(52:4)+Cl-37	907.692	0	0	0	0	0.125	8.49977	5	82.1885	195.492	171.181	71.855	92.6424	148.081	87.0163	183.582	155.469	200.314	191.247	180.685	127.068	85.4229	158.799	163.446	36.5191	2.95739	60.6769	211.019	243.164	160.495	78.3786	43.3733	0.388229	27.7676	0.691242	63.4655	62.345	109.372	51.526	12.3787	27.4601	14.6559	26.2057	84.0236	45.8645	84.4026	16.6107	56.8317	15.8596
TG_oxid(53:3)+Cl-37 & TG_oxid(52:7)+Acetate	923.724	0	0.0625	0.0625	0	0.0625	8.13173	5	5.26184	62.1818	31.9477	5.39788	17.5073	43.4314	7.46078	76.9354	42.3131	59.1573	51.6832	58.4822	43.2178	15.2087	45.1941	98.4347	10.2693	3.96776	1.73001	32.8667	95.2279	52.068	16.5764	11.245	0	14.9773	16.4278	11.8833	10.7118	43.9095	2.29718	17.6984	14.1696	16.5979	14.3952	8.86874	7.08499	21.5011	0	25.1018	14.0747
TG_oxid(54:0)+Cl-35	941.789	0.1875	0.25	0.3125	0	0.125	5.94134	5	0	26.6776	24.9238	10.6417	14.1311	20.2431	0	33.2291	9.76912	35.2974	5.37057	0	34.2482	6.88888	11.3307	23.0768	0	0	7.20054	31.4812	59.1135	52.574	24.4149	0	14.4334	5.47015	10.4375	7.99329	6.65846	17.3103	8.88506	0	21.6182	0	0	9.01817	0	52.9137	20.9131	29.9623	28.3478
TG_oxid(54:5)+Cl-37	933.708	0	0	0.125	0	0.0625	7.43372	5	61.9405	19.7461	227.519	10.8221	206.667	191.132	171.793	226.188	57.8777	45.1731	79.686	26.2848	327.43	189.995	46.6317	68.607	23.8704	6.26878	19.8393	85.9426	31.786	33.6344	2.11709	166.319	71.4879	23.1603	83.7202	7.63619	12.0027	4.03293	370.455	18.2872	0.0106842	3.58718	0	6.07743	6.87653	9.2786	0	7.60432	18.812
TG_oxid(55:1)+Cl-35	953.789	0.375	0.25	0.125	0.5	0.5	7.68475	5	5.58188	0	7.49295	6.30926	0	11.159	0	6.90109	18.9494	6.10738	10.3925	0	0	0	3.88084	25.9063	0	0	24.1952	0	7.25959	5.54209	16.1193	9.16423	6.61191	2.98733	14.9976	35.505	5.20035	13.8726	0	0.489408	13.3113	12.2083	13.9947	9.42279	12.3879	21.4097	7.79343	0.756208	12.9477
TG_oxid(56:0)+Cl-37 & TG_oxid(55:4)+Acetate	971.818	0.625	0.125	0.125	0.5	0.0625	5.82205	5	0	0	0	6.84389	0	7.54407	0.0872158	0	0	4.11477	0	6.63827	0	9.91622	0	0	21.1385	0	8.82474	14.8505	5.62887	5.72887	20.5701	31.0967	19.2591	19.3768	9.26304	6.14153	0	18.7476	6.37537	0.423895	0	0.193343	34.3516	7.23565	20.5415	10.9638	11.1319	8.82509	36.362
TG_oxid(56:6)+Cl-35	957.727	0.4375	0.6875	0.4375	0.5625	0.25	7.37978	5	0	4.27305	7.91198	7.78074	8.01299	0	0	4.01834	6.92364	5.27002	0	6.39493	7.03994	0	0	0	0	0	0.383243	0	0	8.30456	0	0	0	8.45678	0	0	5.98211	6.42193	0	0	0	7.45474	8.2881	0	0	11.0976	3.98172	6.53117	0
TG_oxid(56:9)+Cl-35	951.68	0.8125	0.8125	0.8125	0.875	0.625	7.79485	1	0	0	0	0	0	5.54451	0	0	0	0	0	13.8853	0	8.43818	0	0	5.68817	0	0	0	0	0	0	0	0	0	0.0250687	0	10.6559	0	0	0	0	0	0	0	0	0	0	0	0
TG_oxid(57:1)+Cl-35	981.821	0.75	0.25	0.4375	0.75	0.1875	7.34702	3	0	0	0	0	0	11.2675	6.97173	0	0	0	0.180931	0	0	0	0	0.0336987	12.7177	0	7.62504	0	0	0	9.25066	5.43276	17.5264	10.337	6.90415	5.29271	5.89796	19.1695	4.56153	18.422	20.8513	8.98846	0	6.5996	4.92078	12.2207	0	8.0065	11.1753
TG_oxid(57:1)+Cl-37 & TG_oxid(56:5)+Acetate	983.818	0.5	0.25	0.1875	0.5625	0.125	6.26989	5	12.1126	3.86361	0	0	0	0	0	5.63917	5.41904	3.94232	0	0	5.98476	7.78528	0.293615	0	7.28699	0	26.1074	0	0.417591	0.0225478	0	7.94211	27.1518	27.7044	21.2648	7.47147	0	18.064	0.206318	20.9978	0	20.4049	7.62636	8.39557	10.071	6.34288	9.07653	8.77659	11.8994
TG_oxid(57:4)+Cl-35	975.774	0.75	0.5625	0.375	0.8125	0.3125	7.17497	3	0	9.41219	0	0	0	8.37446	5.59985	0	0	0	0	0	0	0	0	0.0133102	15.584	0	0	0	0	0	4.5656	0	5.3174	12.7631	0	19.2395	6.9471	0	0	8.98012	3.52697	16.4261	0	0	0.126668	4.77662	12.5112	20.9085	7.61538
TG_oxid(57:7)+Cl-35	969.727	0.75	0.25	0.1875	0.75	0.375	6.65186	3	5.59824	0	0	0	0	0	0	5.74442	0	7.49219	0	0	0	0	7.86431	0	21.8474	3.90998	0	9.51786	0	13.1814	0	7.61739	5.65557	13.249	29.6193	8.32909	12.3629	9.16233	0	29.1832	13.7341	10.9866	14.8537	6.86601	7.57426	4.15187	13.189	4.61511	16.9241
TG_oxid(57:7)+Cl-37 & TG_oxid(56:11)+Acetate	971.724	0.4375	0.125	0.0625	0.75	0.3125	7.52612	4	8.08544	7.10183	0	5.83536	0	0	7.87731	0	0	13.8392	0	7.24028	0.334004	7.93971	4.90639	0	0	2.54852	9.9448	8.21263	28.5463	7.12262	12.9924	10.725	14.8062	8.40119	11.5024	6.69111	10.424	15.1207	0	23.0044	6.20556	3.40755	10.669	0	12.7988	32.4909	3.47183	23.5921	13.8492
TG_oxid(57:8)+Cl-35	967.711	0.625	0.5625	0.3125	0.625	0.625	6.55838	5	8.35044	0	7.62324	4.71876	0	0	0	0	0	0	7.95004	0	0	0	0.112035	7.84768	9.3178	0	0	0	0	0	0	7.19032	7.08044	0	17.5103	7.20519	0	6.99805	0	6.5621	12.165	0	15.3207	0	6.71054	6.06948	7.16572	14.8527	13.8111
TG_oxid(57:8)+Cl-37	969.708	0.75	0.375	0.25	0.6875	0.4375	6.91208	4	8.11548	0	0	0	0	7.98344	0	0	0	0	0	0	0	0	9.25048	8.31745	7.77319	2.32689	7.74479	8.96465	6.85413	0	0	6.71933	0	7.63556	36.6774	0	0	3.95918	0	17.5256	11.3396	6.79826	0	6.19853	0	6.29241	8.13638	18.9189	9.80801
TG_oxid(58:4)+Cl-37 & TG_oxid(57:8)+Acetate	991.786	0.875	0.5	0.1875	0.875	0.125	7.01906	3	0	4.76287	0	0	0	0	10.6088	0	0	0	0	0	0	0	0	0	0	0	15.0329	0	0	14.8216	6.41976	15.0626	0	15.845	0	16.441	6.74105	0	0	15.5871	6.89128	26.9431	14.8835	0	7.11265	10.1456	25.9229	12.431	24.8484
TG_oxid(58:5)+Cl-37 & TG_oxid(57:9)+Acetate	989.771	0.875	0.375	0.125	0.5	0.1875	5.97088	4	0	0	0	0	7.41538	0	0	0	0	0	0	0	0	5.03087	0	0	0	0	41.5668	0	0	0	11.7592	7.65411	0	47.8129	5.63104	25.3034	10.1628	48.976	24.313	35.8021	29.921	11.7618	15.1528	6.82942	8.09761	4.40106	11.9084	26.1578	20.4754
TG_oxid(59:0)+Cl-37 & TG_oxid(58:4)+Acetate	1013.86	0.9375	0.25	0.3125	0.8125	0	5.01989	3	0	0	0	0	0	0	8.6011	0	0	0	0	0	0	0	0	0	9.73716	0	17.3629	0	5.97941	0	0	10.5155	12.0644	38.172	34.5251	18.2373	26.6912	21.0262	21.0262	57.5908	34.3417	27.0529	26.0349	6.95404	0	7.80153	51.6634	7.30325	38.7927
TG_oxid(59:6)+Cl-35	999.774	0.9375	0.1875	0.0625	0.75	0.125	5.22453	3	0	0	0	0	0	0	0	0	0.246666	0	0	0	0	0	0	0	24.6192	0	29.2461	0.276651	0	14.2762	28.507	12.2676	8.42887	47.3275	0	31.2135	6.11478	15.9436	8.66313	50.9418	57.4668	55.9319	20.1773	6.45033	0	15.4249	8.10109	21.8644	43.7483
TG_oxid(59:7)+Cl-37 & TG_oxid(58:11)+Acetate	999.755	0.4375	0.0625	0.0625	0.5625	0.0625	6.73901	5	5.18281	0.208158	0	6.70391	0	0	6.23596	0	12.6486	28.661	5.58596	7.62407	0	0	7.9681	0	22.8797	0	44.3123	30.839	70.5654	18.2009	28.9029	12.9218	0.319789	41.1813	6.72104	32.0419	13.3591	7.04946	5.35802	45.1089	57.4668	57.2442	14.3702	7.59358	0	36.9172	23.1238	37.9644	43.7483
TG_oxid(59:8)+Cl-35	995.742	0.875	0.5625	0.5	0.75	0.5625	5.10788	3	0	0	0	11.2539	0	0	0	0	0	0	0	0	5.69242	0	0	0	2.83544	0	6.93145	0	6.50062	0	0	15.9821	0	15.0415	0	0	3.63768	0	10.046	0	7.31792	17.4719	0	0	0	3.96675	12.7646	5.92399	0
TG_oxid(60:10)+Cl-35	1005.73	0.8125	0.5	0.25	0.875	0.625	7.25899	3	0	0	0	0	0	7.43099	0	9.03942	0	0	0	0	11.7573	0	0	0	3.07694	0	21.466	0	0	0	0	20.8096	6.49199	0	5.04888	10.8682	0	18.4883	0	9.31474	7.23063	0	0	6.1067	0	5.84047	4.47998	10.5062	15.8982
TG_oxid(60:10)+Cl-37	1007.72	1	0.6875	0.6875	0.75	0.6875	6.79645	3	0	0	0	0	0	0	0	0	0	0	0	0	0	0	0	0	0	0	8.521	16.4668	0	0	0	0	5.51819	7.52254	0	0	0	0.0107917	0	0	0	0	0	6.02023	0	8.52855	0	8.51026	5.67408
TG_oxid(60:9)+Cl-35	1007.74	1	0.4375	0.375	0.6875	0.5	6.77913	4	0	0	0	0	0	0	0	0	0	0	0	0	0	0	0	0	10.0896	0	24.7493	15.2901	0	0	6.18722	22.0327	13.0986	14.3222	0	0	0	17.2072	0	7.45647	0	9.6264	4.67107	9.20846	0	17.872	17.4673	8.51026	23.0888
TG_oxid(61:8)+Cl-35	1023.77	1	0.5	0.5	0.75	0.5	6.94058	3	0	0	0	0	0	0	0	0	0	0	0	0	0	0	0	0	0	0	8.82346	0	0	0	0	17.0572	0	16.1577	13.0819	0	7.09756	8.98274	15.4371	11.1128	0	0	0	6.88097	0	0	6.76905	6.19866	7.76189
TG_oxid(62:11)+Cl-35	1031.74	1	0.8125	0.9375	0.8125	0.6875	5.11696	1	0	0	0	0	0	0	0	0	0	0	0	0	0	0	0	0	0	0	0	0	0	0	0	0	11.829	0	13.1744	0	0	0	9.49693	0	0	0	0	0	0	0	5.11896	0	0
TG_oxid(62:5)+Cl-37 & TG_oxid(61:9)+Acetate	1045.83	0.9375	0.5625	0.5625	0.875	0.3125	6.73434	3	0	0	0	0	0	0	10.5284	0	0	0	0	0	0	0	0	0	10.0562	0	8.01602	0	0	0	0	9.41752	0	18.3515	0	8.71596	0	12.4888	0	8.71949	0	9.69166	0	0	0	7.54396	5.02239	0	4.81205
TG_oxid(62:9)+Cl-35	1035.77	0.875	0.5625	0.375	0.8125	0.3125	6.87689	3	0	0	8.67027	0	0	0	9.78441	0	0	0	0	0	0	0	0	0	6.56028	0	0	16.724	0	0	8.05962	0	0	18.0949	8.75406	0	0	18.5899	0	18.3421	20.6231	20.4004	23.5007	0	8.54606	5.26782	6.66827	6.63847	7.19666
TG_oxid(63:11)+Cl-37 & TG_oxid(62:15)+Acetate	1047.76	1	0.875	0.5625	0.75	0.6875	5.59215	2	0	0	0	0	0	0	0	0	0	0	0	0	0	0	0	0	0	0	0	0	0	10.0439	0	0	0	9.93159	0	0	0	0	0	0	15.1338	0	13.6291	0	0	0	0	0	0
TG_oxid(63:2)+Cl-35	1063.9	0.9375	0.6875	0.5625	0.9375	0.1875	5.91516	3	4.58216	0	0	0	0	0	0	0	0	0	0	0	0	0	0	0	10.7777	2.84915	0	0	0	0	0	0	0	20.2922	43.3059	0	0	0	0	10.9533	0	30.3396	0	9.03049	0	0	7.60137	6.81904	0
TG_oxid(63:4)+Cl-35	1059.87	1	0.8125	0.4375	0.875	0.125	5.18128	2	0	0	0	0	0	0	0	0	0	0	0	0	0	0	0	0	0	0	8.64622	0	0	0	0	0	12.3485	0	34.3155	0	0	0	0	0	0	8.92043	0	0	8.67278	0	5.03262	8.10665	7.50476
TG_oxid(63:5)+Cl-37 & TG_oxid(62:9)+Acetate	1059.85	0.9375	0.75	0.625	0.8125	0.1875	7.01447	2	0	6.1763	0	0	0	0	0	0	0	0	0	0	0	0	0	0	0	0	12.5219	0	0	0	0	0	7.40188	6.58346	11.5591	0	0	0	0	0	0	4.51784	0	0	0	0	0	8.25251	6.20254
TG_oxid(64:16)+Acetate	1073.77	0.9375	0.8125	0.8125	0.9375	0.5	5.3666	1	0	0	0	0	8.35096	0	0	0	0	0	0	0	0	0	0	0	0	0	6.90251	0	0	0	0	0	0	14.5675	0	8.7879	0	0	0	0	0	0	8.91892	0	0	0	0	7.92821	0
TG_oxid(64:2)+Cl-37 & TG_oxid(63:6)+Acetate	1079.91	0.9375	0.625	0.6875	0.875	0.0625	6.5849	3	0	0	0	0	0	0	3.23432	0	0	0	0	0	0	0	0	0	8.02674	0	23.3754	0	0	0	0	0	12.3878	7.18214	42.8542	0	0	0	0	13.2244	19.7042	7.6594	0	0	0	0	0	0	0
TG_oxid(64:8)+Cl-37	1067.82	0.9375	0.6875	0.6875	0.8125	0.5	6.61244	3	0	0	7.52802	0	0	0	0	0	0	0	0	0	0	0	0	0	0	0	0	0	0	0	8.20522	0	16.5509	0	0	0	0	7.90368	11.1635	6.31801	7.44723	0	8.46063	0	0	0	4.77365	0	0
TG_oxid(64:9)+Cl-35	1063.8	0.9375	0.375	0.375	0.9375	0.375	6.11842	3	0	0	0	5.92601	0	0	0	0	0	0	0	0	0	0	0	0	18.3602	0	0	12.6275	0	0	7.04697	0	8.52156	4.59896	0.623441	8.92347	0	9.38043	15.2111	24.6163	29.1021	7.52159	0	0	4.30471	8.96292	10.1975	7.07043	7.94853
TG_oxid(66:12)+Cl-37	1087.79	0.625	0.625	0.8125	0.9375	0.5	5.8745	3	0.100338	0	0	0	0	0	9.42055	0.492065	0	0.0134186	0	0	0	0.0593002	6.53168	0	0	0	0	8.63974	0	0	10.5667	0	7.29277	8.34476	7.69865	0	10.2796	0	0	0	0	0	7.17138	0	0	0	0	0	0
TG_oxid(67:0)+Acetate	1148.07	0.875	0.3125	0.25	0.5625	0.1875	6.76544	4	0	0	0	0	0	0	0.140301	0	0	0	5.83426	0	0	0	0	0	7.6343	0	8.75594	6.01844	0	6.84835	6.77894	0	0	25.1733	0	0.408132	19.2861	30.622	6.86277	29.9681	11.6418	14.4618	0	0	22.5625	4.38708	7.11649	0	8.34205
TG_oxid(68:0)+Acetate	1162.08	0.6875	0.4375	0.5625	0.75	0.25	4.55775	4	8.03265	0	0	0	0	0	0	6.61629	0	7.16921	7.09952	0	0	5.528	0	0	0	0	11.1445	0	0	7.76959	0	0	30.058	4.75028	6.48854	0	23.8406	17.0127	8.22066	11.4116	0	20.1894	0	21.9096	0	25.0637	0	11.2895	0.688622
TG_oxid(68:11)+Cl-37	1117.83	0.4375	0.6875	0.3125	0.75	0.375	4.48152	4	9.31452	26.6332	0	6.10046	0	5.96376	8.88325	0	6.03051	0	29.5667	0	0	0	20.8139	51.4726	0	0	10.8553	0	8.99395	8.12026	0	0	0	14.7004	0	0	0	0	7.03173	0	4.56707	15.399	0	8.87173	33.9578	4.80631	8.33996	15.4314	0
TG_oxid(68:6)+Cl-37	1127.91	1	0.5625	0.8125	0.875	0.1875	5.40161	2	0	0	0	0	0	0	0	0	0	0	0	0	0	0	0	0	0	0	9.04505	0	0	0	0	5.48949	0	0	9.70978	0	8.53778	9.23463	9.63078	28.3761	7.09995	0	0	0	0	0	0	0	9.08842
TG_oxid(71:1)+Acetate	1202.11	0.6875	0.1875	0.125	0.4375	0.3125	4.72526	5	0	0	0	5.1071	7.01378	0	0	0	6.6761	3.32065	0	0	0	0	5.91027	0	20.8649	0	27.2303	9.08677	5.0726	4.0511	13.1499	43.7158	13.2268	41.2965	10.2592	0	16.0011	14.9897	0	33.2427	20.2836	50.1487	15.5489	4.98522	18.5845	8.14061	7.78386	15.7802	7.62139
[truncated: 45 more columns]
