# Supplementary material for: Lipid extraction from dried blood spots and dried milk spots for untargeted high throughput lipidomics
Source: Royal Society of Chemistry journal article supplement (doi:10.1039/d0mo00102c), 2020-09-10
Supplement: d0mo00102c5.pdf [file d0mo00102c5.pdf]

Supplementary Table 1. List of internal standards used for lipid profiling in the present study

| Lipid Class                      | Isoform                                                      | Mass     | Stock concentration ( $\mu\text{M}$ ) |
|----------------------------------|--------------------------------------------------------------|----------|---------------------------------------|
| Cholesteryl ester                | CE(18:0- $d_6$ )                                             | 658.6603 | 3.80                                  |
| Ceramide                         | C16- $d_{31}$ Ceramide                                       | 566.6928 | 4.40                                  |
| Fatty acid                       | C15:0- $d_{29}$ FA                                           | 271.4076 | 9.23                                  |
| Fatty acid                       | C17:0- $d_{33}$ FA                                           | 303.4635 | 8.25                                  |
| Fatty acid                       | C20:0- $d_{39}$ FA                                           | 351.5484 | 7.13                                  |
| <i>lyso</i> -Phosphatidylcholine | <i>lyso</i> -PC(C14:0)- $d_{42}$                             | 421.5481 | 5.93                                  |
| Phosphatidic acid                | PA(C16:0- $d_{31}$ /C18:1) Na <sup>+</sup> salt              | 704.6784 | 3.55                                  |
| Phosphatidylcholine              | PC(C16:0- $d_{31}$ /C18:1)                                   | 789.7637 | 3.18                                  |
| Phosphatidylethanolamine         | PE(C16:0- $d_{31}$ /C18:1)                                   | 747.7171 | 3.35                                  |
| Phosphatidylglycerol             | PG(C16:0- $d_{31}$ /C18:1) Na <sup>+</sup> salt              | 778.7157 | 3.20                                  |
| Phosphatidylinositol             | PI(C16:0- $d_{31}$ /C18:1) NH <sub>4</sub> <sup>+</sup> salt | 881.7441 | 1.13                                  |
| Phosphatidylserine               | PS(C16:0- $d_{62}$ ) Na <sup>+</sup> salt                    | 733.7794 | 3.40                                  |
| Sphingomyelin                    | SM(C16:0- $d_{31}$ )                                         | 733.7603 | 2.04                                  |
| Triglyceride                     | TG(45:0- $d_{29}$ )                                          | 852.2314 | 2.93                                  |
| Triglyceride                     | TG(48:0- $d_{31}$ )                                          | 900.3167 | 2.78                                  |
| Triglyceride                     | TG(54:0- $d_{35}$ )                                          | 996.4851 | 2.50                                  |
